# Supplementary material for: Convergent evolution and horizontal gene transfer in Arctic Ocean microalgae
Source: Life Sci Alliance. 2022 Dec 15;6(3):e202201833. doi: 10.26508/lsa.202201833 (PMC9756366; doi:10.26508/lsa.202201833)
Supplement: Supplementary file 3 [file LSA-2022-01833_Supplemental_Data_3.xlsx]

## Sheet: Overview
	Data Folder S3. Identification and phylogenetics of PFAMs that have undergone convergent expansions and contractions in Arctic algae.
	This workbook documents global CAFEs (Computational Analyses of gene Family Evolution) of PFAM expansion and contraction across the diversity of sequenced Arctic algae across the pan-algal dataset, along with phylogenies of three Arctic-enriched PFAMs (IBPs/ PF11999, DUF347/ PF03988, PhnA/ PF03831) incorporating meta-sequence data (MATOUs) from the Tara Oceans Ecpedition.
	Additional supporting data pertaining to these analyses is found at the linked osf.io https://osf.io/3pmxb/; in the folders "CAFE and phylPCA" and "Environmentally-curated PFAM trees".
Figures	Worksheet content descriptions:
Fig 3	Sheet 1.	CAFE scores tabulates the occurrence of expansions and contractions of 6993 PFAMs in each library in the pan-algal dataset, based on CAFE. Genomes and transcriptomes were decomposed into separate datasets for these studies; and CAFE for transcriptome libraries were performed using separately constructed orthologous gene groups, which were subsequently related to PFAM content.
		Columns A-C list the PFAM number and assigned function.
		Columns D-K list the number of algal strains (genomes, transcriptomes, Arctic, Antarctic and other) in the dataset inferred to have undergone expansions (signed +ve CAFE scores) or contractions (signed -ve CAFE scores) of the given PFAM.
		Columns L-U list the enrichment ratio, and Log10 chi-squared enrichment Pvalue, of contractions and expansions in Arctic strains compared to non-Arctic strains, excluding freshwater, non-photosynthetic and fragmented strains, in the dataset. P-values are signed such that PFAMs that are over-enriched in Arctic strains are positive; and PFAMs under-enriched in Arctic strains have negative P-values.
		Column V provides the difference in log10 Pvalue between expansion and contraction frequency, used to determine the relative rate of expansion of each PFAM in Arctic species.
		Columns W-JR list the aggregate CAFE score calculated for each PFAM in each library. Each library is identified at multiple levels given in Rows 1-4:
			Row 1 : the strains name
			Row 2 : algal group designated (chlorophytes, chrysophyte-related strains, dinoflagellates, dictyochophytes, diatoms, pelagophytes, haptophytes, cryptomonads)
			Row 3: type of library (genome or transcriptome) from which the sequences were generated. MMETSP transcriptomes were decontaminated using the BLAST based pipeline benchmarked in Marron et al 2016, Dorrell et al 2017.
			Row 4: origin (sampling habitat) of each library. Broadly these are: Arctic Ocean (>60°N); Antarctic Ocean (>55°S); other marine; In addition we note designations as freshwater Arctic; non-photosynthetic strains; or fragmented (defined as < 15% total eukaryotic BUSCOs retrieved).
Fig 3	Sheet 2.	Arctic PFAM log10 Pvalues" details the log2 enrichment ratio, and -log10 chi-squared P-value, for PFAM presence, PFAM expansions, and PFAM contractions in Arctic versus non-Arctic strains in the pan-algal dataset , as plotted in Fig. 3. Pvalues are only provided for PFAMs that are: present in at least one Arctic genome and transcriptome (PFAM presence); present in at least one genome and trancrip…
Fig 4; S10, S11	Sheet 3	Tree topologies provides fasta reads, alignments and best-scoring RAxML trees realised for each PFAM, consisting of all classified TARA sequences, labelled "MATOUv2_"; additional sequences from Northwater metaT data in the Canadian Arctic, labelled "G02_"; all sequences containing the PFAM from all algal genomes and transcriptomes studied; and all remaining sequences containing the PFAM from a co…
Fig 5	Sheet 4.	"IBD BLAST searches" tabulates the best-scoring hit s(defined by e-value) retrieved by, or retrieving, either Arctic or Antarctic eukaryotic algae, in a BLASTp search of the IBD domain in Sheet 3 against itself. Congeneric matches were excluded, incuding reciprocal hits between Scrippsiella and Peridinium which are closely related to one another (Dorrell et al., 2017), as are hits involving Tara …
	Sheet 5.	IBD BLAST heatmap tabulates the frequency with which IBPs from pairs of Arctic and Antarctic eukaryotic algae retrieve one another as best hits in the within-alignment search. Values in rows correspond to the frequency with which each strain was recovered as a BLAST best hit by the taxonomic query on the left hand side; and values in columns correspond to the frequency with which each strain in t…
Fig 5	Sheet 6.	Environmental correlations lists linear correlation coefficients for each PFAM, separated into metaT and metaG data; Northern and Southern hemisphere stations only; and all reads, and reads only inferred to be "Arctic" as above. Only significant correlations (t-test, P < 0.05) are shown.
		Cultured sequences were labelled either as having “Arctic”, “Antarctic” or “Other” provenances by NCBI keyword search.
		Alignments were generated using MAFFT with parameters —op 12, —ep 3, —maxiterations 2, and poorly aligned or incomplete sequences were manually identified and removed from each alignment.
		Refined alignments were trimmed with trimal using the -gt 0.5 parameter, and consensus trees were generated for each alignment using RAxML, integrated into the CIPRES web server, three substitution matrices (GTR, JTT and WAG), and automated bootstrapping.
Fig 5	Sheets 7-9 labelled: 7. "PF11999", 8. "PF03831", 9. "P03988" show tabulated abundances for all sequences (ice-binding protein); in TARA Oceans V2 (Arctic inclusive) metaT and metaG data, respectively of ice-binding proteins, DUF347 and PhnA domains.
		Columns A to VU list the MATOU v2 sequence ID and its relative abundance across all TARA samples. With rows 4 to 1615 containg MetaT counts (columns A to VM) and rows 1919 to 2908 containing MetaG (columns A to VU)
		Columns VU to VX calculate the correlation, and signficance of correlation, of the total abundance of all metaT and all metaG meta-gene sequences containing the PFAM to station latitude.
		Columns VY to WC list the total abundance of each MATOU Id, and the total % assigned to Arctic (>60°N); Antarctic (>55°S); or other biomes. Each MATOU sequence was then assigned as being either "Arctic" or "Antarctic" if > 70% of all read abundance was attributable to either habitat; or "Bipolar" if >35% of all read abundance was attributable both to Arctic and Antarctic habitats.
		Values for the columns are from Sheet 3, e.g. for the IBP rows 1609 to 1614 and rows 2903 to 2908 are total relative metaT and metaG abundances, respecitvely, for all MATOUs assigned to IBP Arctic Clades A to D, or Antarctic Clades 1 and 2.

## Sheet: 1. CAFE scores
							Total number of changes															Species	Aureococcus_genomic	Chrysochromulina	Cryptophyceae_sp_CCMP2293	Emiliania_genomic	Fracy	Guillardia	Micromonas_genomic	Micromonas_sp-Genome-Other<22>	Ngaditana	Noceanica	Ochromonadaceae_sp_CCMP2298	Ostreococcus	Pavlovales_sp_CCMP2436	Pelagophyceae_sp_CCMP2097	Phatr3	Psemu	Symbiodinium_minutum_genomic	Thalassiosira_oceanica_genomic	Thalassiosira_pseudonana_genomic	Alexandrium_catenella	Alexandrium_margalefii	Alexandrium_monilatum_CCMP3105SAR_Alveolates_Dinos_Gonyaulacales-Transcriptome-Other	Alexandrium_tamarense_CCMP1771SAR_Alveolates_Dinos_Gonyaulacales-Transcriptome-Other	Alexandrium_andersonii	Amphidinium_carterae_CCMP1314SAR_Alveolates_Dinos_Gymnodiniales-Transcriptome-Other	Amphiprora_paludosa	Amphiprora_spStramenopiles_Diatoms_Raphid_pen-Transcriptome-Other
							Arctic		Antarctic		Other		Enrichment ratio		Expected value		Chistat		Log10 Chi-squared P-value			Group	Pelagophytes	Haptophytes	Cryptomonads	Haptophytes	Diatoms	Geminigeraceae	Chlorophytes	Chlorophytes	Chrysophytes	Chrysophytes	Chrysophytes	Chlorophytes	Haptophytes	Pelagophytes	Diatoms	Diatoms	Dinoflagellates	Diatoms	Diatoms	Dinoflagellates	Dinoflagellates	Dinoflagellates	Dinoflagellates	Dinoflagellates	Dinoflagellates	Diatoms	Diatoms
			Genomes		Transcriptomes		Total	19	Total	21	Total	204	Arctic v non-Arctic									Library type	Genome	Genome	Genome	Genome	Genome	Genome	Genome	Genome	Genome	Genome	Genome	Genome	Genome	Genome	Genome	Genome	Genome	Genome	Genome	Transcriptome	Transcriptome	Transcriptome	Transcriptome	Transcriptome	Transcriptome	Transcriptome	Transcriptome
PFAM	Function	Description	Expansions	Contractions	Expansions	Contractions	Expansions	Contractions	Expansions	Contractions	Expansions	Contractions	Expansions	Contractions	Expansions	Contractions	Expansions	Contractions	Expansions	Contractions	Differential	Habitat	Other	Other	Arctic	Other	Antarctic	Other	Other	Other	Other	Other	Arctic	Other	Arctic	Arctic	Other	Other	Other	Other	Other	Other	Other	Other	Other	Other	Other	Other	Other
PF00001	7tm_1	7 transmembrane receptor (rhodopsin family)	0	0	23	59	0	4	1	4	22	49	0	0.893744	1.94222	4.47556	2.12136	0.0548364	-0.837861	-0.0889214	-0.74894		0	0	0	0	0	0	0	0	0	0	0	0	0	0	0	0	0	0	0	0	0	0	4	0	0	-2	15
PF00002	7tm_2	7 transmembrane receptor (Secretin family)	0	0	10	41	0	3	1	3	9	32	0	1.01504	0.844444	2.95556	0.92233	0.000724703	-0.472546	0.00942883	-0.481974		0	0	0	0	0	0	0	0	0	0	0	0	0	0	0	0	0	0	0	0	0	0	2	0	0	0	0
PF00003	7tm_3	7 transmembrane sweet-taste receptor of 3 GCPR	0	0	98	5	5	0	12	0	79	5	0.650665	0	7.68444	0.422222	1.01937	0.461165	-0.504915	-0.303574	-0.201341		0	0	0	0	0	0	0	0	0	0	0	0	0	0	0	0	0	0	0	0	0	0	0	0	0	41	65
PF00004	AAA	ATPase family associated with various cellular activities (AAA)	9	10	167	62	6	13	15	6	146	51	0.441321	2.70083	13.5956	4.81333	4.61956	14.9523	-1.50018	3.95756	-5.45775		3	-11	-10	25	10	10	1	-1	1	-2	4	-1	-15	-2	-10	-6	18	9	-7	39	-1	40	87	-18	20	17	23
PF00005	ABC_tran	ABC transporter	7	11	183	50	9	9	17	4	155	46	0.619645	2.13158	14.5244	4.22222	2.28458	5.82316	-0.883838	1.80089	-2.68473		27	-28	0	57	20	4	-1	-1	2	-2	-18	-8	-14	-19	-14	-11	54	13	-14	108	31	146	265	-15	64	41	61
PF00006	ATP-synt_ab	ATP synthase alpha/beta family, nucleotide-binding domain	5	4	166	24	12	1	15	3	136	23	0.941094	0.455466	12.7511	2.19556	0.0479995	0.708646	-0.0827143	-0.398055	0.315341		0	0	0	0	-1	0	0	0	2	-1	4	0	1	0	-1	2	0	1	-2	28	19	56	43	12	11	7	6
PF00008	EGF	EGF-like domain	2	4	43	67	4	4	4	5	35	56	1.21457	0.776531	3.29333	5.15111	0.16421	0.279377	0.164113	-0.223946	0.388059		0	0	4	0	-1	0	0	0	0	0	-1	0	0	0	-1	0	0	1	-1	0	0	0	7	0	0	1	-2
PF00009	GTP_EFTU	Elongation factor Tu GTP binding domain	6	6	217	17	12	5	21	0	179	18	0.710526	3.28947	16.8889	1.52	1.53771	8.53117	-0.667643	2.45703	-3.12467		0	-5	-5	6	5	6	-1	0	0	0	2	3	0	-1	-2	-3	1	0	0	65	6	77	166	7	50	21	37
PF00010	HLH	Helix-loop-helix DNA-binding domain	4	10	42	54	3	6	5	6	37	50	0.845865	1.2688	3.54667	4.72889	0.0914698	0.369883	-0.117864	0.265146	-0.38301		-2	0	-1	-1	0	5	0	-1	2	-1	-2	-1	-1	1	0	0	-2	-1	2	0	0	0	1	0	0	0	1
PF00011	HSP20	Hsp20/alpha crystallin family	6	5	57	77	3	10	3	10	57	58	0.592105	1.74149	5.06667	5.74222	0.916707	3.40797	-0.470645	1.18787	-1.65852		0	0	-2	2	0	6	0	0	-1	1	4	0	-3	0	3	0	-1	5	-2	0	2	0	2	0	-1	-4	5
PF00012	HSP70	Hsp70 protein	7	7	236	0	19	0	20	0	193	7	1.05634	0	17.9867	0.591111	0.0618872	0.645631	0.0949938	-0.375018	0.470012		-2	-5	8	5	0	-3	0	-1	0	-1	6	-2	2	2	0	0	14	3	-2	95	41	80	108	45	39	12	14
PF00013	KH_1	KH domain	8	10	217	13	12	4	21	0	181	19	0.703491	2.49307	17.0578	1.60444	1.62957	3.84496	-0.695158	1.30194	-1.9971		-1	-4	5	5	2	-2	2	2	-2	2	-2	-7	-2	1	-4	-1	48	0	-1	65	-7	99	127	-2	46	8	9
PF00014	Kunitz_BPTI	Kunitz/Bovine pancreatic trypsin inhibitor domain	0	0	10	18	0	1	3	0	7	15	0	0.789474	0.844444	1.26667	0.92233	0.0609669	-0.472546	-0.094218	-0.378327		0	0	0	0	0	0	0	0	0	0	0	0	0	0	0	0	0	0	0	0	0	0	0	0	0	0	0
PF00015	MCPsignal	Methyl-accepting chemotaxis protein (MCP) signalling domain	0	0	6	43	0	4	0	5	5	33	0	1.24654	0.422222	3.20889	0.461165	0.211172	-0.303574	0.189868	-0.493442		0	0	0	0	0	0	0	0	0	0	0	0	0	0	0	0	0	0	0	0	-1	0	-1	0	0	0	0
PF00016	RuBisCO_large	Ribulose bisphosphate carboxylase large chain, catalytic domain	1	6	32	63	2	7	1	6	30	51	0.764007	1.45429	2.61778	4.81333	0.158353	1.07418	-0.160725	0.522873	-0.683597		0	0	0	0	-1	-1	0	0	0	-1	-1	0	0	0	-1	0	13	0	-1	3	-4	0	16	-8	-1	0	0
PF00017	SH2	SH2 domain	1	4	14	33	2	5	0	5	11	24	2.15311	2.04174	0.928889	2.44889	1.33015	2.86387	0.604188	1.04292	-0.438736		0	0	-1	0	0	0	0	0	1	0	-1	0	0	0	0	0	-1	-1	0	0	0	0	0	0	0	0	0
PF00018	SH3_1	SH3 domain	5	4	99	26	9	2	4	2	83	24	1.22505	0.910931	7.34667	2.19556	0.402909	0.0188999	0.279352	-0.050291	0.329643		2	-1	4	5	0	0	0	0	0	0	2	0	-1	-1	0	0	4	0	-1	31	10	24	30	8	9	0	0
PF00020	TNFR_c6	TNFR/NGFR cysteine-rich region	0	0	9	40	1	4	1	2	7	33	1.48026	1.35338	0.675556	2.95556	0.168464	0.399354	0.166546	0.277841	-0.111294		0	0	0	0	0	0	0	0	0	0	0	0	0	0	0	0	0	0	0	0	0	0	0	0	0	0	0
PF00021	UPAR_LY6	u-PAR/Ly-6 domain	0	0	0	0	0	0	0	0	0	0	0	0	0	0	0	0	FALSE	FALSE	FALSE		0	0	0	0	0	0	0	0	0	0	0	0	0	0	0	0	0	0	0	0	0	0	0	0	0	0	0
PF00022	Actin	Actin	7	6	235	0	16	3	20	0	196	3	0.877193	11.8421	18.24	0.253333	0.298561	31.0924	-0.233003	7.60902	-7.84202		3	-5	-2	17	0	3	0	0	-2	1	4	1	-4	-2	-1	0	16	0	0	30	26	28	68	23	27	3	6
PF00023	Ank	Ankyrin repeat	14	5	0	0	4	0	1	0	9	5	4.73684	0	0.844444	0.422222	12.5487	0.461165	3.40178	-0.303574	3.70535		-13	247	1017	250	2	343	66	87	-16	9	29	36	95	26	-13	-2	632	2	-5	0	0	0	0	0	0	0	0
PF00024	PAN_1	PAN domain	4	7	36	92	0	9	3	9	35	75	0	1.2688	3.20889	7.09333	3.50485	0.554824	-1.21333	0.340699	-1.55402		0	0	-1	3	0	3	-1	0	0	0	-1	-1	-1	-1	0	0	20	1	-1	1	-13	19	8	-11	-1	0	0
PF00025	Arf	ADP-ribosylation factor family	8	10	233	3	15	3	21	0	194	10	0.826193	3.55263	18.1556	0.844444	0.59546	5.88459	-0.356236	1.81605	-2.17228		3	-9	-4	11	2	6	-1	1	-1	-1	13	-5	0	-1	-5	-2	23	-3	2	95	53	99	184	41	70	18	33
PF00026	Asp	Eukaryotic aspartyl protease	5	7	151	30	8	6	13	2	127	27	0.676692	2.45009	11.8222	2.44889	1.34304	5.53684	-0.608185	1.73002	-2.3382		1	5	-2	-1	2	6	0	0	0	-1	-7	0	-3	-2	0	-1	47	0	0	133	57	85	123	-9	39	1	5
PF00027	cNMP_binding	Cyclic nucleotide-binding domain	8	10	229	2	15	4	20	0	192	8	0.837885	5.92105	17.9022	0.675556	0.510776	17.3357	-0.323487	4.50411	-4.8276		28	30	-15	-9	0	34	-2	4	-3	1	-7	-13	-12	-13	-6	1	53	8	-4	105	43	114	185	22	117	21	26
PF00028	Cadherin	Cadherin domain	0	0	0	0	0	0	0	0	0	0	0	0	0	0	0	0	FALSE	FALSE	FALSE		0	0	0	0	0	0	0	0	0	0	0	0	0	0	0	0	0	0	0	0	0	0	0	0	0	0	0
PF00030	Crystall	Beta/Gamma crystallin	0	0	11	24	0	3	1	4	9	17	0	1.69173	0.844444	1.77333	0.92233	0.91622	-0.472546	0.47048	-0.943026		0	0	0	0	0	0	0	0	0	0	0	0	0	0	0	0	0	0	0	0	0	0	0	0	0	0	0
PF00031	Cystatin	Cystatin domain	1	7	27	48	2	3	4	2	20	46	0.986842	0.740132	2.02667	4.05333	0.00038054	0.297362	-0.00681238	-0.232442	0.22563		-1	-2	-1	0	0	0	0	0	0	0	1	-1	0	0	-1	-1	-1	0	0	0	0	3	0	0	0	0	0
PF00032	Cytochrom_B_C	Cytochrome b(C-terminal)/b6/petD	2	7	4	19	1	4	0	5	5	16	2.36842	2.25564	0.422222	1.77333	0.850493	3.00935	0.448046	1.08205	-0.634		0	0	0	0	-1	0	0	0	1	-1	-1	0	0	-1	-1	0	-1	3	-1	0	0	0	0	0	-1	0	0
PF00033	Cytochrome_B	Cytochrome b/b6/petB	0	0	17	50	0	3	2	6	14	38	0	0.807416	1.35111	3.71556	1.47573	0.149634	-0.648892	-0.155594	-0.493298		0	0	0	0	0	0	0	0	0	0	0	0	0	0	0	0	0	0	0	0	0	0	1	0	2	0	0
PF00034	Cytochrom_C	Cytochrome c	4	6	50	63	2	7	7	2	44	55	0.464396	1.45429	4.30667	4.81333	1.34473	1.07418	-0.608709	0.522873	-1.13158		1	-3	0	8	0	0	0	0	0	-1	0	-1	-1	-1	0	0	5	2	-1	-5	5	1	4	0	6	-1	1
PF00035	dsrm	Double-stranded RNA binding motif	4	4	44	72	4	8	5	6	38	58	1.10159	1.48026	3.63111	5.40444	0.0406136	1.34771	0.075573	0.609633	-0.53406		0	-2	0	1	1	0	0	0	0	0	0	0	2	-1	0	-1	4	0	-1	8	-4	1	2	-8	0	-1	1
PF00036	EF-hand_1	EF hand	8	10	0	0	1	3	0	1	7	6	1.69173	5.07519	0.591111	0.591111	0.305407	10.4334	0.236188	2.90743	-2.67124		9	85	-12	-16	-3	24	-1	3	-2	0	4	-13	-29	-5	-1	2	44	4	-3	0	0	0	0	0	0	0	0
PF00037	Fer4	4Fe-4S binding domain	6	4	43	52	1	5	2	4	42	42	0.269139	1.28719	3.71556	3.88444	2.16331	0.346784	-0.849736	0.254973	-1.10471		0	0	-1	2	-1	0	0	0	1	0	-1	1	0	0	-1	1	8	0	1	0	0	0	21	-4	-1	2	0
PF00038	Filament	Intermediate filament protein	0	0	33	77	0	6	3	5	26	62	0	1.06049	2.44889	5.65778	2.67476	0.0224391	-0.991609	0.0550612	-1.04667		0	0	0	0	0	0	0	0	0	0	0	0	0	0	0	0	0	0	0	0	-2	3	0	-2	4	1	-1
PF00040	fn2	Fibronectin type II domain	4	5	30	50	2	6	4	3	28	42	0.740132	1.57895	2.70222	3.8	0.198241	1.37623	-0.183001	0.618443	-0.801443		0	-1	0	1	0	3	0	0	0	0	-1	0	-1	-1	0	0	3	1	-1	1	0	-1	-1	-2	0	0	-1
PF00041	fn3	Fibronectin type III domain	7	6	155	25	13	2	15	4	126	23	1.09183	0.877193	11.9067	2.28	0.108808	0.0373201	0.129886	-0.0722116	0.202097		0	6	-1	-1	-1	4	-1	0	1	-2	1	0	-3	1	0	0	14	2	0	7	7	21	51	6	22	1	0
PF00042	Globin	Globin	6	6	119	14	10	2	6	1	102	15	1.09649	1.48026	9.12	1.35111	0.0920247	0.336928	0.118262	0.250567	-0.132304		-1	-1	2	3	0	0	-1	1	0	0	-1	-2	0	1	0	0	7	2	-1	8	8	19	37	3	12	19	41
PF00043	GST_C	Glutathione S-transferase, C-terminal domain	7	8	176	31	12	5	15	2	147	30	0.877193	1.85033	13.68	2.70222	0.223921	2.10781	-0.196496	0.834016	-1.03051		4	-4	-4	5	4	5	0	0	0	0	4	-2	-1	-2	-1	-2	2	-3	2	41	30	41	48	8	27	9	19
PF00044	Gp_dh_N	Glyceraldehyde 3-phosphate dehydrogenase, NAD binding domain	3	8	168	17	11	3	15	0	137	20	0.856994	1.77632	12.8356	1.68889	0.284932	1.0985	-0.226589	0.530774	-0.757362		-1	-1	-2	1	0	1	0	0	0	-1	-1	-1	-1	0	0	0	9	-1	0	24	15	33	49	11	11	5	10
PF00046	Homeodomain	Homeodomain	5	8	47	60	6	5	6	8	38	53	1.61483	0.970664	3.71556	5.15111	1.5173	0.00480821	0.661488	-0.0246978	0.686185		-3	-7	-1	8	0	0	3	-1	0	0	-2	-2	6	4	-3	0	-2	0	3	0	0	0	0	0	0	0	1
PF00047	ig	Immunoglobulin domain	0	0	1	17	0	1	0	1	1	13	0	0.845865	0.0844444	1.18222	0.092233	0.0304899	-0.118411	-0.0648036	-0.0536079		0	0	0	0	0	0	0	0	0	0	0	0	0	0	0	0	0	0	0	0	0	0	0	0	0	0	0
PF00050	Kazal_1	Kazal-type serine protease inhibitor domain	4	3	20	42	3	3	4	3	16	35	1.77632	0.934903	1.68889	3.20889	1.0985	0.0147527	0.530774	-0.0441553	0.574929		-1	0	0	0	0	0	0	0	1	0	2	0	0	1	0	0	-1	6	-1	0	0	0	0	0	0	0	0
PF00051	Kringle	Kringle domain	6	4	52	57	4	7	5	1	48	49	0.893744	1.65789	4.47556	4.22222	0.0548364	1.97368	-0.0889214	0.795724	-0.884646		3	-5	-1	3	0	0	0	0	0	0	-1	1	6	-1	0	0	3	2	0	4	-3	-1	2	-5	0	0	0
PF00052	Laminin_B	Laminin B (Domain IV)	1	1	7	22	1	1	1	2	6	18	1.69173	0.592105	0.591111	1.68889	0.305407	0.305569	0.236188	-0.236264	0.472452		0	0	0	0	0	1	0	0	0	0	0	0	0	0	0	0	-1	0	0	0	0	0	0	0	0	0	0
PF00053	Laminin_EGF	Laminin EGF domain	3	4	6	40	2	6	0	2	7	34	3.38346	1.97368	0.591111	3.04	3.59408	3.10699	1.23668	1.10815	0.128534		0	0	4	0	0	-1	0	0	0	0	5	0	0	-1	0	0	-1	-1	1	0	0	0	2	0	0	0	0
PF00054	Laminin_G_1	Laminin G domain	0	0	5	22	0	2	1	3	4	15	0	1.31579	0.422222	1.52	0.461165	0.164046	-0.303574	0.164019	-0.467593		0	0	0	0	0	0	0	0	0	0	0	0	0	0	0	0	0	0	0	0	0	0	0	0	0	0	0
PF00056	Ldh_1_N	lactate/malate dehydrogenase, NAD binding domain	2	0	55	57	0	3	5	3	50	47	0	0.710526	4.64444	4.22222	5.07282	0.384426	-1.61432	-0.271448	-1.34288		0	0	0	1	0	0	0	0	0	0	0	0	0	0	0	0	6	0	0	7	-6	1	4	-11	0	-1	0
PF00057	Ldl_recept_a	Low-density lipoprotein receptor domain class A	0	0	17	38	1	4	0	0	15	33	0.789474	1.43541	1.26667	2.78667	0.0609669	0.571323	-0.094218	0.347045	-0.441263		0	0	0	0	0	0	0	0	0	0	0	0	0	0	0	0	0	0	0	0	-4	0	2	-4	0	0	0
PF00058	Ldl_recept_b	Low-density lipoprotein receptor repeat class B	0	0	14	31	0	1	0	2	12	26	0	0.422932	1.01333	2.36444	1.1068	0.857272	-0.533459	-0.45038	-0.0830795		0	0	0	0	0	0	0	0	0	0	0	0	0	0	0	0	0	0	0	0	-1	2	1	-1	0	0	0
PF00059	Lectin_C	Lectin C-type domain	5	2	106	18	12	2	9	1	84	16	1.52801	1.39319	7.85333	1.43556	2.3665	0.240072	0.906701	0.204708	0.701992		0	-4	1	12	0	0	0	0	0	0	3	0	-1	1	0	0	2	0	0	5	2	6	18	1	2	14	36
PF00060	Lig_chan	Ligand-gated ion channel	6	7	124	22	5	4	15	3	103	20	0.501784	2.0595	9.96444	1.94222	2.6914	2.3492	-0.996147	0.901884	-1.89803		2	0	-1	4	4	8	-1	1	0	0	-2	-1	-1	-1	-1	0	11	0	0	9	7	11	20	1	12	3	5
PF00061	Lipocalin	Lipocalin / cytosolic fatty-acid binding protein family	0	4	5	31	0	4	0	2	5	27	0	1.63339	0.422222	2.44889	0.461165	1.06122	-0.303574	0.518646	-0.82222		0	0	0	0	0	0	0	0	0	0	-1	0	0	0	-1	-1	-1	0	0	0	0	0	0	0	0	0	-1
PF00062	Lys	C-type lysozyme/alpha-lactalbumin family	0	0	2	19	0	1	0	1	1	16	0	0.696594	0.0844444	1.43556	0.092233	0.143603	-0.118411	-0.15198	0.0335686		0	0	0	0	0	0	0	0	0	0	0	0	0	0	0	0	0	0	0	0	0	0	0	0	0	0	0
PF00063	Myosin_head	Myosin head (motor domain)	7	7	232	0	17	2	20	0	191	5	0.954103	4.73684	17.8178	0.422222	0.0407151	6.27436	-0.0756748	1.91187	-1.98755		15	-7	-1	13	0	1	0	0	-2	0	16	-1	2	-8	-2	0	4	2	-1	17	5	41	43	6	18	19	17
PF00066	Notch	LNR domain	3	7	47	61	5	7	6	5	39	55	1.31579	1.38158	3.8	5.06667	0.410116	0.798071	0.282404	0.429842	-0.147438		0	-2	5	9	0	-1	0	0	-1	0	0	0	0	1	-1	-1	-1	-1	0	0	0	0	16	0	0	0	0
PF00067	p450	Cytochrome P450	7	9	235	0	15	4	21	0	196	5	0.818579	9.47368	18.3244	0.422222	0.654848	31.8092	-0.378424	7.76934	-8.14777		2	-4	-5	10	10	5	0	0	-2	2	-2	0	-4	-3	-7	-2	23	3	-3	25	23	30	53	8	14	22	27
PF00069	Pkinase	Protein kinase domain	8	11	0	0	1	3	1	0	6	8	1.69173	4.44079	0.591111	0.675556	0.305407	8.52125	0.236188	2.45466	-2.21848		55	-29	-56	146	31	160	-6	-1	-15	10	33	-41	-81	-35	-29	-17	476	16	-16	0	0	0	0	0	0	0	0
PF00070	Pyr_redox	Pyridine nucleotide-disulphide oxidoreductase	9	9	235	0	15	4	21	0	198	5	0.811103	9.47368	18.4933	0.422222	0.716506	31.8092	-0.40089	7.76934	-8.17023		2	1	-4	1	7	6	3	-1	-2	1	-4	-3	-2	-1	-3	-4	15	1	0	39	26	56	76	12	34	20	27
PF00071	Ras	Ras family	8	10	233	3	15	4	21	0	194	9	0.826193	5.26316	18.1556	0.76	0.59546	14.6703	-0.356236	3.89262	-4.24886		4	-5	-1	8	1	4	-2	1	-2	0	15	-5	-1	-2	-3	-2	38	-1	1	92	48	100	183	41	76	17	35
PF00072	Response_reg	Response regulator receiver domain	7	7	233	2	18	0	21	0	191	8	1.00546	0	17.9022	0.675556	0.000579115	0.737864	0.00841914	-0.40855	0.416969		-15	-6	0	1	3	1	1	-1	0	0	73	-2	14	26	-1	0	-13	-2	0	6	8	12	23	2	1	30	32
PF00073	Rhv	picornavirus capsid protein	0	0	0	7	0	1	0	0	0	6	0	1.97368	0	0.506667	0	0.517832	FALSE	0.326272	FALSE		0	0	0	0	0	0	0	0	0	0	0	0	0	0	0	0	0	0	0	0	0	0	0	0	0	0	0
PF00075	RNase_H	RNase H	3	6	54	58	8	7	6	5	39	49	2.10526	1.53509	3.8	4.56	5.00064	1.4111	1.59623	0.629165	0.967064		-1	0	0	4	3	-1	0	0	0	-2	-3	0	-1	0	-1	0	91	0	0	0	-2	0	2	-1	0	0	0
PF00076	RRM_1	RNA recognition motif. (a.k.a. RRM, RBD, or RNP domain)	9	10	0	0	1	3	1	0	7	7	1.48026	5.07519	0.675556	0.591111	0.168464	10.4334	0.166546	2.90743	-2.74089		-38	-20	-17	29	9	27	3	1	-3	2	-12	-16	-9	54	-12	-5	85	-5	3	0	0	0	0	0	0	0	0
PF00077	RVP	Retroviral aspartyl protease	0	0	24	38	2	3	5	0	14	34	1.24654	1.04489	1.60444	2.87111	0.105586	0.00627279	0.127712	0.0283194	0.0993925		0	0	0	0	0	0	0	0	0	0	0	0	0	0	0	0	0	0	0	0	0	0	0	0	0	0	3
PF00078	RVT_1	Reverse transcriptase (RNA-dependent DNA polymerase)	5	9	64	84	5	7	7	8	55	74	0.955008	1.01091	5.23556	6.92444	0.0114964	0.000893972	-0.0387623	0.0104846	-0.049247		-3	0	-4	1	7	11	-1	0	0	-1	-22	0	-3	0	-5	-2	635	25	-11	0	0	0	4	0	0	0	7
PF00079	Serpin	Serpin (serine protease inhibitor)	3	6	29	40	2	6	4	3	25	35	0.816697	1.86981	2.44889	3.20889	0.0893403	2.61871	-0.116329	0.976293	-1.09262		0	0	4	0	0	-1	0	-1	0	0	-1	-1	-1	0	0	0	1	2	-1	1	-1	0	1	0	0	0	0
PF00080	Sod_Cu	Copper/zinc superoxide dismutase (SODC)	4	4	40	62	2	7	2	2	35	56	0.640114	1.42922	3.12444	4.89778	0.439915	0.975845	-0.294852	0.490493	-0.785345		1	0	0	0	0	-2	0	0	1	0	0	0	-1	-1	0	0	1	3	-2	0	3	0	10	-8	0	0	1
PF00081	Sod_Fe_N	Iron/manganese superoxide dismutases, alpha-hairpin domain	5	0	52	50	6	3	4	3	43	39	1.51176	0.845865	3.96889	3.54667	1.12358	0.0914698	0.538877	-0.117864	0.656742		0	0	0	0	0	2	0	0	0	1	0	0	1	0	0	0	1	0	1	-2	-2	2	0	0	0	-1	1
PF00082	Peptidase_S8	Subtilase family	8	9	230	0	16	3	21	0	191	6	0.893744	5.92105	17.9022	0.506667	0.219346	13.0018	-0.194133	3.50697	-3.7011		0	-4	-6	11	5	8	1	0	-3	2	-1	-4	-2	2	1	-3	-4	3	-4	40	20	47	61	17	11	13	21
PF00083	Sugar_tr	Sugar (and other) transporter	8	8	180	54	9	10	15	6	155	44	0.626935	2.36842	14.3556	4.22222	2.17218	8.50493	-0.852239	2.45077	-3.30301		-3	-16	-9	47	5	10	-1	0	0	0	3	1	-10	3	-6	-1	37	-2	1	66	16	132	172	-14	33	13	27
PF00084	Sushi	Sushi repeat (SCR repeat)	2	1	19	27	1	3	3	1	16	20	0.623269	1.69173	1.60444	1.77333	0.247574	0.91622	-0.208458	0.47048	-0.678938		0	0	-1	0	0	5	0	0	0	0	0	0	0	0	0	0	3	0	0	0	-4	0	8	-1	0	0	0
PF00085	Thioredoxin	Thioredoxin	7	12	100	125	3	15	11	9	89	106	0.355263	1.54462	8.44444	9.71111	3.82372	3.11299	-1.29643	1.10975	-2.40618		2	-11	-5	26	13	10	-1	2	-1	-1	-7	-11	-12	-1	-8	-4	19	-8	8	13	-8	7	71	-40	1	-4	9
PF00088	Trefoil	Trefoil (P-type) domain	2	3	24	32	1	6	1	2	21	26	0.538278	2.53759	1.85778	2.36444	0.430857	6.00781	-0.291096	1.84641	-2.1375		-1	0	-1	0	0	1	0	0	0	0	0	0	-1	0	0	0	1	0	0	1	-4	1	3	-6	1	0	0
PF00089	Trypsin	Trypsin	8	8	149	58	6	11	16	4	129	47	0.490018	2.55418	12.2444	4.30667	3.46557	11.1792	-1.20302	3.08239	-4.2854		0	-8	1	35	3	0	2	0	1	-2	-8	-3	-7	-1	-15	5	10	13	-5	15	-3	12	15	0	2	3	6
PF00090	TSP_1	Thrombospondin type 1 domain	3	3	30	46	2	7	2	3	26	37	0.845865	2.07237	2.36444	3.37778	0.0609799	4.18513	-0.094229	1.38955	-1.48378		0	0	-1	0	0	3	1	0	0	0	-1	-1	0	0	0	0	42	0	0	0	-15	0	24	-3	8	0	0
PF00091	Tubulin	Tubulin/FtsZ family, GTPase domain	6	7	235	0	16	3	20	0	195	4	0.881273	8.88158	18.1556	0.337778	0.277753	22.0463	-0.22317	5.57488	-5.79805		5	-1	1	7	0	-2	0	0	0	0	-1	0	-4	-4	1	-1	18	-2	1	18	14	27	50	6	16	9	18
PF00092	VWA	von Willebrand factor type A domain	6	7	71	135	1	15	10	11	61	111	0.16679	1.456	5.99556	10.3022	4.54044	2.31636	-1.48013	0.892724	-2.37285		0	1	2	2	2	0	0	0	-1	0	-1	-1	-4	-1	0	-1	15	8	-3	5	-22	10	23	-15	3	1	1
PF00094	VWD	von Willebrand factor type D domain	0	0	25	45	0	2	1	5	22	35	0	0.592105	1.94222	3.37778	2.12136	0.611138	-0.837861	-0.362151	-0.475711		0	0	0	0	0	0	0	0	0	0	0	0	0	0	0	0	0	0	0	-1	5	1	0	0	6	0	4
PF00095	WAP	WAP-type (Whey Acidic Protein) 'four-disulfide core'	0	0	6	25	0	1	1	3	4	20	0	0.514874	0.422222	1.94222	0.461165	0.497344	-0.303574	-0.318154	0.0145799		0	0	0	0	0	0	0	0	0	0	0	0	0	0	0	0	0	0	0	0	0	0	0	-1	0	0	0
PF00096	zf-C2H2	Zinc finger, C2H2 type	3	4	47	75	4	8	5	5	37	61	1.12782	1.43541	3.54667	5.57333	0.0627857	1.14265	0.0957466	0.545012	-0.449265		0	0	59	0	0	-14	0	0	0	1	-1	0	-1	0	0	0	1	0	-1	0	-2	2	0	-1	0	-1	1
PF00097	zf-C3HC4	Zinc finger, C3HC4 type (RING finger)	8	11	218	16	13	6	19	2	184	18	0.758361	3.55263	17.1422	1.68889	1.0872	11.7692	-0.52711	3.22026	-3.74737		-16	-23	-8	57	12	13	3	-2	-4	1	-16	-9	-15	16	-18	-5	57	77	-41	70	6	140	153	3	93	52	53
PF00098	zf-CCHC	Zinc knuckle	7	9	160	32	13	4	16	2	131	33	1.04726	1.35338	12.4133	2.95556	0.0300585	0.399354	0.0643126	0.277841	-0.213528		-6	-6	-3	14	-1	2	1	2	-1	0	-4	-4	-2	6	-3	8	186	0	0	11	10	12	17	6	5	3	12
PF00101	RuBisCO_small	Ribulose bisphosphate carboxylase, small chain	2	4	8	20	1	1	1	0	8	21	1.31579	0.56391	0.76	1.77333	0.0820232	0.36681	0.110937	-0.263804	0.374741		0	0	0	0	0	0	1	0	0	-1	-1	1	0	0	0	0	-1	0	-1	0	0	0	0	0	0	0	0
PF00102	Y_phosphatase	Protein-tyrosine phosphatase	3	7	59	64	3	8	6	4	51	54	0.623269	1.63339	4.81333	4.89778	0.742722	2.12243	-0.410285	0.838165	-1.24845		0	1	-3	0	0	14	-1	0	-2	0	1	0	-2	0	-1	0	-1	0	-1	0	-3	0	4	-7	0	0	0
PF00106	adh_short	short chain dehydrogenase	8	10	224	12	14	5	21	0	186	17	0.800915	3.48297	17.48	1.43556	0.752319	9.46824	-0.413702	2.67973	-3.09343		-2	-27	2	60	18	-1	0	2	1	-1	-16	-11	-11	1	-9	-8	32	8	-9	84	42	84	199	-43	20	29	32
PF00107	ADH_zinc_N	Zinc-binding dehydrogenase	7	7	235	0	15	3	21	0	196	4	0.818579	8.88158	18.3244	0.337778	0.654848	22.0463	-0.378424	5.57488	-5.9533		0	1	-3	3	7	6	0	0	3	-2	-5	1	-5	0	-4	-2	15	0	-1	35	38	33	61	9	17	11	15
PF00108	Thiolase_N	Thiolase, N-terminal domain	4	2	166	26	13	1	14	3	134	23	1.04018	0.455466	12.4978	2.19556	0.0218802	0.708646	0.0543315	-0.398055	0.452387		1	0	2	0	0	0	0	0	0	0	0	0	2	-1	0	0	3	-1	0	17	10	13	29	5	6	5	3
PF00109	ketoacyl-synt	Beta-ketoacyl synthase, N-terminal domain	8	9	121	62	8	8	13	3	100	59	0.838379	1.52801	9.54222	5.23556	0.270595	1.57766	-0.219731	0.679651	-0.899382		46	-1	1	5	0	-1	2	-2	3	-4	-8	0	-4	-19	-2	1	32	-2	1	124	84	120	169	57	49	0	1
PF00111	Fer2	2Fe-2S iron-sulfur cluster binding domain	7	7	168	29	14	2	14	2	139	30	1.08359	0.740132	12.92	2.70222	0.0978487	0.198241	0.122383	-0.183001	0.305384		-5	-7	-1	9	0	1	0	1	1	-1	11	-1	1	6	-1	0	-2	0	0	10	17	25	32	10	14	9	6
PF00112	Peptidase_C1	Papain family cysteine protease	8	9	179	32	12	5	18	3	148	32	0.856056	1.69173	14.0178	2.95556	0.315276	1.52703	-0.24074	0.664425	-0.905165		14	2	-1	-2	3	0	-1	1	-1	1	-4	0	2	-8	-5	-1	36	-1	1	112	60	84	163	38	37	9	10
PF00113	Enolase_C	Enolase, C-terminal TIM barrel domain	4	4	162	20	11	1	15	0	132	22	0.886144	0.538278	12.4133	1.85778	0.174637	0.430857	-0.170038	-0.291096	0.121058		0	-1	-1	2	0	1	0	0	0	0	1	0	0	0	-2	0	7	-1	0	26	18	32	45	20	10	2	1
PF00115	COX1	Cytochrome C and Quinol oxidase polypeptide I	1	5	9	30	0	6	0	4	9	23	0	2.63158	0.76	2.28	0.830097	6.51994	-0.440998	1.97195	-2.41295		0	0	-1	0	0	0	0	0	1	-1	-1	0	0	0	-1	-1	0	0	0	1	0	-1	4	-1	0	0	0
PF00116	COX2	Cytochrome C oxidase subunit II, periplasmic domain	0	0	12	31	0	5	0	4	12	21	0	2.36842	1.01333	2.11111	1.1068	4.25246	-0.533459	1.40679	-1.94025		0	0	0	0	0	0	0	0	0	0	0	0	0	0	0	0	0	0	0	0	2	-1	-1	-1	0	0	0
PF00117	GATase	Glutamine amidotransferase class-I	7	4	177	23	13	1	15	1	147	24	0.950292	0.473684	13.68	2.11111	0.0366675	0.636475	-0.0715306	-0.371621	0.30009		0	-2	-3	5	0	3	0	1	0	1	0	-1	0	1	-1	0	1	1	0	16	16	93	38	5	14	7	8
PF00118	Cpn60_TCP1	TCP-1/cpn60 chaperonin family	7	7	233	0	17	1	20	0	193	6	0.945145	1.97368	17.9867	0.506667	0.0587158	0.517832	-0.0922999	0.326272	-0.418572		3	-2	0	2	3	-1	-1	0	0	0	4	1	3	-2	-1	-2	4	-1	0	32	21	44	69	23	11	13	13
PF00119	ATP-synt_A	ATP synthase A chain	0	0	13	25	0	2	1	4	11	17	0	1.12782	1.01333	1.77333	1.1068	0.0313929	-0.533459	0.0658215	-0.599281		0	0	0	0	0	0	0	0	0	0	0	0	0	0	0	0	0	0	0	0	-2	3	1	-3	1	0	0
PF00120	Gln-synt_C	Glutamine synthetase, catalytic domain	6	5	161	22	10	3	16	2	133	20	0.794772	1.61483	12.5822	1.85778	0.575484	0.758652	-0.348637	0.415951	-0.764587		1	0	0	3	1	1	0	0	0	0	-1	-2	-1	-1	-1	0	11	1	0	8	10	19	21	3	10	5	7
PF00121	TIM	Triosephosphate isomerase	6	4	166	14	13	1	16	1	135	15	1.01952	0.740132	12.7511	1.35111	0.00526762	0.0991205	0.0258838	-0.12327	0.149154		1	-1	1	0	2	0	0	-1	0	0	3	1	0	-1	-1	0	1	0	0	17	7	24	18	6	4	4	3
PF00122	E1-E2_ATPase	E1-E2 ATPase	8	10	179	44	11	7	17	3	151	42	0.775376	1.84211	14.1867	3.8	0.777416	2.90718	-0.422586	1.0546	-1.47719		2	-4	-1	7	3	3	-1	1	-1	2	-1	-1	-3	-1	0	-3	9	-4	4	25	7	31	68	-1	25	17	15
PF00124	Photo_RC	Photosynthetic reaction centre protein	0	0	30	62	1	6	1	3	26	49	0.438596	1.3664	2.28	4.39111	0.782298	0.637777	-0.424305	0.372105	-0.79641		0	0	0	0	0	0	0	0	0	0	0	0	0	0	0	0	0	0	0	-1	-1	0	0	0	0	-1	1
PF00125	Histone	Core histone H2A/H2B/H3/H4	6	10	234	0	15	4	21	0	194	6	0.826193	7.89474	18.1556	0.506667	0.59546	25.3711	-0.356236	6.32518	-6.68142		19	-10	-3	19	6	4	0	0	-1	0	-1	-1	-2	-15	-4	-4	4	9	-4	17	15	15	32	10	13	12	13
PF00126	HTH_1	Bacterial regulatory helix-turn-helix protein, lysR family	2	4	6	20	1	3	0	4	7	15	1.69173	1.86981	0.591111	1.60444	0.305407	1.30935	0.236188	0.597718	-0.36153		0	0	1	0	0	-1	0	0	0	0	-1	0	0	0	0	0	-1	1	-1	0	0	0	0	0	0	0	0
PF00127	Copper-bind	Copper binding proteins, plastocyanin/azurin family	3	7	17	45	0	5	6	2	13	42	0	1.34569	1.60444	3.71556	1.75243	0.480456	-0.731488	0.311388	-1.04288		0	-1	0	7	0	0	0	1	0	0	-1	0	-1	0	-1	-1	-1	1	-1	0	0	0	0	0	0	0	0
PF00128	Alpha-amylase	Alpha amylase, catalytic domain	3	4	50	82	1	10	3	10	45	62	0.246711	1.64474	4.05333	6.08	2.50746	2.72977	-0.945739	1.00659	-1.95233		0	-1	-1	0	0	0	1	1	0	0	0	-1	-1	0	0	0	27	0	0	6	-14	3	21	-21	2	0	0
PF00130	C1_1	Phorbol esters/diacylglycerol binding domain (C1 domain)	0	0	16	42	0	5	0	3	13	32	0	1.69173	1.09778	2.95556	1.19903	1.52703	-0.563018	0.664425	-1.22744		0	0	0	0	0	0	0	0	0	0	0	0	0	0	0	0	0	0	0	0	-1	-1	-1	-1	0	0	0
PF00132	Hexapep	Bacterial transferase hexapeptide (six repeats)	7	10	172	29	12	3	17	1	141	34	0.8994	1.01504	13.3422	2.95556	0.146527	0.000724703	-0.153739	0.00942883	-0.163168		0	-3	-1	7	3	3	1	-1	-3	4	1	-1	-1	0	-1	-2	-3	-1	1	5	3	9	17	1	6	8	7
PF00133	tRNA-synt_1	tRNA synthetases class I (I, L, M and V)	5	6	173	32	11	3	15	2	143	32	0.82445	1.04489	13.3422	2.87111	0.44642	0.00627279	-0.297535	0.0283194	-0.325855		0	-2	0	1	0	0	0	-1	-2	2	-1	0	1	0	-1	0	3	1	-1	14	8	9	27	5	9	7	8
PF00134	Cyclin_N	Cyclin, N-terminal domain	8	8	234	0	16	1	21	0	195	7	0.877193	1.69173	18.24	0.591111	0.298561	0.305407	-0.233003	0.236188	-0.469191		-1	-5	0	4	2	3	-1	0	-4	3	-6	-1	3	0	-3	-1	1	2	4	45	19	41	59	10	19	26	40
PF00135	COesterase	Carboxylesterase family	5	7	155	28	9	5	13	2	129	26	0.750556	2.11466	11.9911	2.36444	0.810476	3.16449	-0.434176	1.12346	-1.55763		4	-2	0	16	3	0	0	0	0	1	-2	0	-3	-4	-3	-1	27	0	-1	44	30	27	72	11	15	3	2
PF00136	DNA_pol_B	DNA polymerase family B	6	6	72	73	5	6	9	6	59	62	0.870743	1.04489	5.74222	5.74222	0.104128	0.0125456	-0.12672	0.0405685	-0.167288		1	0	1	1	1	-1	0	0	0	1	0	-1	-1	-1	-2	0	0	2	-1	2	-1	0	15	0	1	0	0
PF00137	ATP-synt_C	ATP synthase subunit C	6	6	156	27	10	2	14	3	129	26	0.828119	0.816697	12.0756	2.44889	0.387317	0.0893403	-0.272692	-0.116329	-0.156364		0	-1	0	2	-1	1	-1	0	0	-1	-2	1	-1	0	2	0	10	0	1	44	37	30	36	7	20	8	11
PF00139	Lectin_legB	Legume lectin domain	1	6	26	57	4	7	3	7	19	46	2.15311	1.56405	1.85778	4.47556	2.6603	1.53869	0.987665	0.66794	0.319724		-1	0	-1	-1	0	0	0	0	-1	0	0	0	-1	1	0	0	-1	0	0	0	0	0	4	0	0	4	0
PF00140	Sigma70_r1_2	Sigma-70 factor, region 1.2	1	5	23	34	1	4	2	3	20	31	0.538278	1.39319	1.85778	2.87111	0.430857	0.480144	-0.291096	0.311263	-0.602358		0	0	0	-1	0	-1	0	0	0	0	-1	0	1	-1	0	0	-1	0	0	0	0	0	0	0	0	0	1
PF00141	peroxidase	Peroxidase	7	6	79	90	4	8	7	8	72	76	0.5996	1.12782	6.67111	7.09333	1.16299	0.125571	-0.55153	0.14082	-0.692351		-3	-2	0	3	1	0	0	1	0	0	2	-1	-1	2	0	-1	8	6	-2	2	-15	14	8	-23	-1	-2	1
PF00142	Fer4_NifH	4Fe-4S iron sulfur cluster binding proteins, NifH/frxC family	2	5	36	47	5	1	4	2	27	45	1.91002	0.25196	2.61778	3.96889	2.33786	2.42103	0.898725	-0.921848	1.82057		0	-2	0	0	1	0	0	0	0	-1	0	0	1	0	-1	0	-1	-1	0	0	0	0	0	0	5	0	1
PF00144	Beta-lactamase	Beta-lactamase	6	8	156	29	9	6	16	3	129	27	0.735027	2.36842	12.2444	2.53333	0.933947	5.10296	-0.476462	1.62187	-2.09834		1	-1	0	13	4	0	-2	1	0	0	-2	0	-4	-2	-3	-1	18	6	-5	25	24	25	52	10	19	3	6
PF00145	DNA_methylase	C-5 cytosine-specific DNA methylase	6	8	69	79	4	9	11	6	55	67	0.717703	1.45999	5.57333	6.16444	0.482568	1.41034	-0.312238	0.628932	-0.94117		2	-1	0	5	1	0	4	0	-1	0	-9	-1	-2	-4	-2	0	127	2	-2	4	-6	4	3	-13	0	1	0
PF00147	Fibrinogen_C	Fibrinogen beta and gamma chains, C-terminal globular domain	0	0	11	28	1	2	0	2	9	23	1.31579	0.947368	0.76	2.11111	0.0820232	0.00634398	0.110937	-0.0284847	0.139422		0	0	0	0	0	0	0	0	0	0	0	0	0	0	0	0	0	0	0	0	3	0	0	0	0	0	0
PF00148	Oxidored_nitro	Nitrogenase component 1 type Oxidoreductase	0	0	9	20	0	2	1	1	7	16	0	1.39319	0.675556	1.43556	0.737864	0.240072	-0.40855	0.204708	-0.613259		0	0	0	0	0	0	0	0	0	0	0	0	0	0	0	0	0	0	0	0	0	0	0	0	4	0	0
PF00149	Metallophos	Calcineurin-like phosphoesterase	6	9	167	57	7	10	15	5	142	50	0.527992	2.15311	13.2578	4.64444	3.2135	6.65076	-1.13648	2.00387	-3.14035		3	-6	-6	22	2	9	-1	0	-2	1	-9	-3	-15	-2	0	-3	80	0	0	94	38	96	140	8	45	8	12
PF00150	Cellulase	Cellulase (glycosyl hydrolase family 5)	6	8	71	97	5	13	6	11	59	79	0.910931	1.71053	5.48889	7.6	0.0472497	4.1425	-0.0820116	1.37862	-1.46063		-1	-2	-2	13	1	2	0	0	-1	3	-3	0	-6	1	-2	0	16	0	-1	3	-15	23	12	-11	1	1	0
PF00151	Lipase	Lipase	0	0	0	0	0	0	0	0	0	0	0	0	0	0	0	0	FALSE	FALSE	FALSE		0	0	0	0	0	0	0	0	0	0	0	0	0	0	0	0	0	0	0	0	0	0	0	0	0	0	0
PF00152	tRNA-synt_2	tRNA synthetases class II (D, K and N)	4	4	170	23	12	1	15	2	138	22	0.928793	0.493421	12.92	2.02667	0.0710763	0.565969	-0.102496	-0.344991	0.242495		-1	0	0	1	0	0	0	0	1	-1	2	0	-2	0	1	0	-2	0	0	7	5	7	18	5	7	6	5
PF00153	Mito_carr	Mitochondrial carrier protein	8	10	182	51	12	7	17	4	152	48	0.84086	1.59413	14.2711	4.39111	0.392362	1.67466	-0.274856	0.708551	-0.983407		-4	-27	-9	56	2	15	-3	1	2	-2	-4	-5	-12	4	-3	0	16	4	-5	43	19	85	138	-9	27	25	24
PF00154	RecA	recA bacterial DNA recombination protein	4	3	47	54	7	6	3	1	40	48	1.92778	1.45005	3.63111	4.13778	3.37037	0.906282	1.17797	0.467115	0.710855		-2	0	0	-1	0	0	0	0	0	0	-1	0	2	2	0	0	2	1	0	0	-4	2	2	-3	0	-1	0
PF00155	Aminotran_1_2	Aminotransferase class I and II	8	10	235	0	16	3	21	0	196	7	0.873151	5.07519	18.3244	0.591111	0.320023	10.4334	-0.242912	2.90743	-3.15034		7	-7	-8	14	5	13	2	-2	-2	2	2	-1	-3	-6	-3	-2	1	-1	0	35	25	49	89	7	22	23	23
PF00156	Pribosyltran	Phosphoribosyl transferase domain	7	7	168	25	12	3	17	0	137	28	0.922761	1.2688	13.0044	2.36444	0.0841762	0.184941	-0.112543	0.17577	-0.288312		1	-2	-1	3	3	2	0	0	1	0	-1	1	-1	0	1	-1	-3	-1	0	18	10	11	21	9	8	6	8
PF00158	Sigma54_activat	Sigma-54 interaction domain	5	7	47	65	4	7	4	5	42	56	1.02975	1.35893	3.88444	5.15111	0.00372714	0.718013	0.0216738	0.401432	-0.379758		-1	1	0	0	0	-1	1	0	1	-1	-1	2	-1	0	-1	2	-1	0	0	0	0	0	-1	0	0	2	0
PF00160	Pro_isomerase	Cyclophilin type peptidyl-prolyl cis-trans isomerase/CLD	6	10	184	40	9	6	18	2	154	40	0.619645	1.69173	14.5244	3.54667	2.28458	1.83244	-0.883838	0.754883	-1.63872		3	-10	0	25	9	0	-1	2	-1	0	-6	-4	-7	-2	-11	-2	13	8	-7	58	40	64	82	21	54	20	19
PF00162	PGK	Phosphoglycerate kinase	4	4	164	18	12	0	15	1	133	20	0.960171	0	12.4978	1.77333	0.021506	1.93689	-0.0538382	-0.78514	0.731301		-1	-1	0	2	0	0	0	0	0	0	3	0	0	0	-1	0	6	-2	1	13	11	29	34	26	10	4	3
PF00163	Ribosomal_S4	Ribosomal protein S4/S9 N-terminal domain	3	5	42	57	5	5	3	5	35	50	1.55817	1.07656	3.20889	4.64444	1.08037	0.0295033	0.524889	0.0636763	0.461213		0	-1	0	0	-1	0	-1	0	2	-1	-1	0	0	0	0	0	2	1	0	7	-1	-1	4	0	-1	0	0
PF00164	Ribosom_S12_S23	Ribosomal protein S12/S23	1	5	46	39	4	1	2	1	37	39	1.21457	0.296053	3.29333	3.37778	0.16421	1.82411	0.164113	-0.752457	0.916569		-1	0	0	0	0	0	0	0	0	-1	-1	0	0	1	-1	0	0	0	-1	1	-3	1	15	-3	0	0	0
PF00165	HTH_AraC	Bacterial regulatory helix-turn-helix proteins, AraC family	0	0	2	19	0	2	0	2	2	14	0	1.48026	0.168889	1.35111	0.184466	0.336928	-0.175508	0.250567	-0.426075		0	0	0	0	0	0	0	0	0	0	0	0	0	0	0	0	0	0	0	0	0	0	0	0	0	0	0
PF00166	Cpn10	Chaperonin 10 Kd subunit	4	3	53	62	3	4	4	4	48	54	0.683198	0.816697	4.39111	4.89778	0.478944	0.178681	-0.310779	-0.172302	-0.138478		0	-1	0	1	1	0	0	0	0	0	-1	1	0	1	0	0	-1	0	0	0	-2	10	8	-4	0	0	-3
PF00167	FGF	Fibroblast growth factor	0	0	12	25	0	3	3	3	8	19	0	1.61483	0.928889	1.85778	1.01456	0.758652	-0.50333	0.415951	-0.919281		0	0	0	0	0	0	0	0	0	0	0	0	0	0	0	0	0	0	0	0	0	0	-1	0	0	0	0
PF00168	C2	C2 domain	7	10	179	49	10	8	15	5	151	45	0.71338	1.89474	14.0178	4.22222	1.25123	3.6455	-0.579521	1.2501	-1.82962		-8	13	-17	-2	0	54	-2	0	-2	1	-2	-10	-17	14	-1	1	37	1	-2	92	40	100	118	17	58	2	9
PF00169	PH	PH domain	8	9	75	142	3	13	10	10	65	122	0.473684	1.16627	6.33333	11.1467	1.90942	0.333811	-0.777213	0.249165	-1.02638		-4	3	-8	2	1	24	-1	0	1	-2	26	-3	-8	9	0	-3	-9	1	-1	0	-8	6	9	-2	3	-3	-2
PF00170	bZIP_1	bZIP transcription factor	5	8	157	30	11	2	16	1	130	33	0.892213	0.696594	12.3289	2.87111	0.155443	0.287205	-0.159024	-0.227666	0.0686417		-4	-1	-2	0	5	3	0	0	1	0	0	-2	0	2	-1	-1	-5	-1	1	1	3	1	8	1	0	28	28
PF00171	Aldedh	Aldehyde dehydrogenase family	8	9	234	0	16	2	21	0	195	7	0.877193	3.38346	18.24	0.591111	0.298561	3.59408	-0.233003	1.23668	-1.46968		6	-4	0	10	1	1	-1	1	-1	0	2	-1	-3	-4	-2	-1	8	2	-2	45	22	48	66	18	14	16	16
PF00172	Zn_clus	Fungal Zn(2)-Cys(6) binuclear cluster domain	6	7	32	49	3	6	7	6	26	43	1.07656	1.45005	2.78667	4.13778	0.017702	0.906282	0.0485873	0.467115	-0.418527		0	-5	-18	3	1	71	0	0	8	-3	-2	0	2	0	-1	0	-2	-2	1	0	0	0	0	0	0	0	1
PF00173	Cyt-b5	Cytochrome b5-like Heme/Steroid binding domain	7	10	184	40	9	9	17	3	155	37	0.619645	2.66447	14.5244	3.37778	2.28458	10.0509	-0.883838	2.81737	-3.70121		3	-9	-2	13	2	1	0	1	-1	0	-9	-1	-1	-3	-1	-2	32	-1	1	80	43	100	103	34	49	13	21
PF00174	Oxidored_molyb	Oxidoreductase molybdopterin binding domain	6	3	59	64	4	10	5	6	54	48	0.802855	2.19298	4.98222	4.56	0.210269	6.9877	-0.189394	2.08581	-2.2752		2	-2	0	1	2	0	0	0	0	0	-1	0	1	-1	0	0	9	1	0	0	-4	4	4	-2	-1	1	0
PF00175	NAD_binding_1	Oxidoreductase NAD-binding domain	5	7	176	30	11	4	17	3	144	28	0.809088	1.52801	13.5956	2.61778	0.538053	0.788832	-0.334193	0.426602	-0.760795		0	0	-1	4	7	0	0	0	-1	0	-6	2	-6	0	-1	-4	20	2	-3	39	30	46	61	15	22	13	26
PF00176	SNF2_N	SNF2 family N-terminal domain	6	10	228	0	15	4	21	0	188	6	0.849912	7.89474	17.6489	0.506667	0.43157	25.3711	-0.291393	6.32518	-6.61657		3	-10	-4	30	4	7	0	0	-1	0	-4	-5	-12	-2	-7	-1	8	1	-2	16	2	44	59	7	28	34	33
PF00177	Ribosomal_S7	Ribosomal protein S7p/S5e	6	2	44	41	8	3	0	2	40	36	2.36842	0.934903	3.37778	3.20889	6.80394	0.0147527	2.04116	-0.0441553	2.08532		0	-1	0	0	0	0	0	0	1	-1	1	0	1	0	0	1	2	2	0	4	-1	-2	9	0	0	-1	0
PF00179	UQ_con	Ubiquitin-conjugating enzyme	8	8	235	0	17	1	21	0	195	7	0.932018	1.69173	18.24	0.591111	0.0914579	0.305407	-0.117856	0.236188	-0.354044		0	-4	2	15	3	1	-1	1	0	-1	2	-6	-10	0	-3	-1	16	2	-2	44	34	57	86	24	33	17	22
PF00180	Iso_dh	Isocitrate/isopropylmalate dehydrogenase	3	1	52	45	3	7	3	0	48	35	0.696594	2.36842	4.30667	2.95556	0.430808	5.95345	-0.291076	1.83302	-2.1241		0	0	-1	0	0	0	0	0	0	0	1	1	0	0	0	0	2	0	0	0	0	0	6	-2	-1	-1	0
PF00181	Ribosomal_L2	Ribosomal Proteins L2, RNA binding domain	5	0	43	54	4	3	1	3	42	44	1.10159	0.755879	3.63111	3.96889	0.0406136	0.25692	0.075573	-0.213075	0.288648		0	0	0	0	0	0	0	0	1	0	1	0	0	0	0	1	2	1	0	-2	-1	0	8	0	0	-1	0
PF00182	Glyco_hydro_19	Chitinase class I	2	3	15	38	0	4	2	2	13	33	0	1.35338	1.26667	2.95556	1.3835	0.399354	-0.620682	0.277841	-0.898523		0	-1	0	3	0	0	0	0	0	0	-1	0	-1	0	0	0	0	0	3	2	0	0	17	0	0	0	0
PF00183	HSP90	Hsp90 protein	7	2	166	23	14	0	15	2	135	21	1.10526	0	12.6667	1.94222	0.152098	2.12136	0.157055	-0.837861	0.994916		1	-1	0	1	1	0	0	0	0	0	2	0	1	0	0	0	8	-1	1	31	49	47	61	14	32	5	6
PF00185	OTCace	Aspartate/ornithine carbamoyltransferase, Asp/Orn binding domain	2	3	42	41	0	3	4	0	40	38	0	0.934903	3.71556	3.20889	4.05825	0.0147527	-1.35698	-0.0441553	-1.31283		0	0	-1	1	0	0	0	0	1	-1	0	0	0	0	0	0	-1	0	0	0	0	4	1	-1	0	0	0
PF00186	DHFR_1	Dihydrofolate reductase	0	4	37	50	2	4	3	2	30	47	0.717703	0.966702	2.78667	4.13778	0.241284	0.00497615	-0.205317	-0.0251373	-0.180179		0	0	0	0	0	0	0	0	0	0	-2	0	0	-1	-1	0	0	-1	0	3	0	1	3	-2	0	1	0
PF00187	Chitin_bind_1	Chitin recognition protein	1	5	19	38	0	5	4	3	16	35	0	1.55817	1.68889	3.20889	1.84466	1.08037	-0.758439	0.524889	-1.28333		0	-1	0	0	-1	0	0	0	-1	0	-1	0	0	0	0	0	-1	1	0	0	0	0	0	0	0	-1	0
PF00188	CAP	Cysteine-rich secretory protein family	3	6	55	67	0	8	8	7	48	55	0	1.52801	4.72889	5.23556	5.16505	1.57766	-1.63741	0.679651	-2.31706		0	0	0	2	-1	-1	0	-1	0	-1	-2	-1	0	0	0	0	9	0	5	9	-7	0	4	-16	0	-1	3
PF00189	Ribosomal_S3_C	Ribosomal protein S3, C-terminal domain	6	1	31	29	6	1	1	1	29	25	2.36842	0.455466	2.53333	2.19556	5.10296	0.708646	1.62187	-0.398055	2.01993		0	0	1	0	0	0	0	0	1	-1	0	0	1	0	0	1	1	1	0	0	0	-1	10	-1	0	0	0
PF00190	Cupin_1	Cupin	3	5	18	42	1	3	3	6	14	35	0.696594	0.866496	1.43556	3.46222	0.143603	0.0669791	-0.15198	-0.0992031	-0.052777		-1	-1	0	0	1	-1	0	0	0	0	-1	0	0	1	-1	0	2	0	0	0	1	0	0	-1	0	-1	0
PF00191	Annexin	Annexin	4	3	49	49	3	3	6	4	41	43	0.755879	0.755879	3.96889	3.96889	0.25692	0.25692	-0.213075	-0.213075	0		1	1	0	-2	0	0	-1	0	0	0	0	0	0	-1	1	0	1	0	0	0	-1	1	3	0	0	0	2
PF00193	Xlink	Extracellular link domain	0	0	2	13	1	2	0	1	1	10	11.8421	2.15311	0.0844444	0.928889	10.3641	1.33015	2.89114	0.604188	2.28696		0	0	0	0	0	0	0	0	0	0	0	0	0	0	0	0	0	0	0	0	0	0	0	0	0	0	-1
PF00194	Carb_anhydrase	Eukaryotic-type carbonic anhydrase	6	7	58	77	5	9	8	3	48	68	1.05733	1.50111	4.72889	5.99556	0.0168492	1.62754	0.0473426	0.694554	-0.647212		0	-3	-2	1	2	7	0	0	1	-1	-1	-1	1	0	0	-1	4	-1	0	0	-9	3	5	-4	0	0	-2
PF00195	Chal_sti_synt_N	Chalcone and stilbene synthases, N-terminal domain	2	3	18	40	2	2	1	4	17	36	1.31579	0.592105	1.52	3.37778	0.164046	0.611138	0.164019	-0.362151	0.52617		0	0	0	1	0	0	0	0	-1	0	3	0	-1	0	0	0	0	-1	0	0	-1	-1	0	0	0	0	0
PF00196	GerE	Bacterial regulatory proteins, luxR family	3	3	14	27	1	3	3	2	11	24	0.845865	1.3664	1.18222	2.19556	0.0304899	0.318889	-0.0648036	0.242394	-0.307198		0	-1	0	1	0	-1	0	0	0	0	1	0	0	0	1	0	0	-1	0	0	0	0	0	0	0	-1	0
PF00198	2-oxoacid_dh	2-oxoacid dehydrogenases acyltransferase (catalytic domain)	5	5	56	55	5	7	6	4	48	45	1.09649	1.69173	4.56	4.13778	0.0460123	2.13785	0.0808417	0.842533	-0.761691		-1	-1	-1	1	0	1	0	0	0	0	2	1	-1	0	0	0	0	-1	1	0	0	-1	11	-1	0	-2	0
PF00199	Catalase	Catalase	0	0	3	16	0	1	0	2	3	13	0	0.789474	0.253333	1.26667	0.276699	0.0609669	-0.222665	-0.094218	-0.128447		0	0	0	0	0	0	0	0	0	0	0	0	0	0	0	0	0	0	0	0	0	0	0	0	0	0	0
PF00200	Disintegrin	Disintegrin	1	2	11	27	0	6	2	1	10	21	0	3.22967	1.01333	1.85778	1.1068	9.8921	-0.533459	2.77992	-3.31338		0	0	0	0	0	0	-1	2	0	0	-1	0	0	0	0	0	0	0	0	0	0	0	0	0	3	0	-1
PF00201	UDPGT	UDP-glucoronosyl and UDP-glucosyl transferase	4	6	49	68	2	7	8	6	41	57	0.483351	1.31579	4.13778	5.32	1.202	0.574163	-0.563962	0.348132	-0.912093		0	-4	0	9	3	0	0	0	0	0	-2	0	0	-1	-1	-1	34	2	-1	23	-6	-1	36	-26	0	0	2
PF00202	Aminotran_3	Aminotransferase class-III	6	7	169	25	12	3	16	2	138	26	0.922761	1.2688	13.0044	2.36444	0.0841762	0.184941	-0.112543	0.17577	-0.288312		1	0	2	1	1	-2	-1	1	-1	0	0	0	-2	-1	0	-1	0	1	-1	17	10	24	29	7	16	8	9
PF00203	Ribosomal_S19	Ribosomal protein S19	6	1	37	38	4	1	2	3	35	33	1.28023	0.328947	3.12444	3.04	0.265595	1.49149	0.217311	-0.653676	0.870987		0	0	0	0	0	0	0	0	1	-1	1	0	0	1	0	1	2	1	0	5	0	0	4	-5	0	0	-1
PF00204	DNA_gyraseB	DNA gyrase B	3	2	50	54	7	5	8	5	37	43	1.84211	1.23355	3.8	4.05333	2.90718	0.239406	1.0546	0.204373	0.850229		0	0	-1	-1	0	0	0	0	0	0	1	0	2	0	0	0	3	0	0	0	-6	4	7	-1	0	0	2
PF00205	TPP_enzyme_M	Thiamine pyrophosphate enzyme, central domain	3	5	48	40	0	6	6	1	41	36	0	1.92034	3.96889	3.12444	4.33495	2.85386	-1.42785	1.04022	-2.46807		0	0	0	1	0	-1	0	0	1	0	-1	0	-1	0	0	-1	4	-1	0	0	-4	3	10	-4	0	0	4
PF00206	Lyase_1	Lyase	4	4	55	53	0	8	7	2	49	42	0	2.15311	4.72889	3.71556	5.16505	5.32061	-1.63741	1.67624	-3.31365		2	0	0	1	0	-1	0	0	1	0	-1	0	0	-1	0	0	1	0	-1	2	-1	0	1	0	0	-1	0
PF00207	A2M	Alpha-2-macroglobulin family	0	4	14	36	0	5	1	4	11	29	0	1.79426	1.01333	2.78667	1.1068	1.89708	-0.533459	0.773643	-1.3071		0	-1	0	0	0	0	-1	0	0	0	0	-1	-1	0	0	0	0	0	0	0	0	0	1	0	0	0	0
PF00208	ELFV_dehydrog	Glutamate/Leucine/Phenylalanine/Valine dehydrogenase	4	2	53	58	4	5	7	5	43	46	0.947368	1.16099	4.22222	4.30667	0.012688	0.12092	-0.0408082	0.137845	-0.178653		-1	0	0	1	2	2	0	0	0	0	1	0	0	0	0	0	-1	0	0	4	-5	0	12	-7	0	0	0
PF00209	SNF	Sodium:neurotransmitter symporter family	4	4	45	50	2	5	5	2	40	44	0.526316	1.28719	3.8	3.88444	0.927632	0.346784	-0.474335	0.254973	-0.729307		0	-3	1	1	0	0	0	0	0	0	-1	-1	0	0	0	0	1	2	-2	0	0	0	4	-4	0	0	-1
PF00210	Ferritin	Ferritin-like domain	2	1	33	49	0	5	1	3	34	40	0	1.37699	2.95556	3.63111	3.22816	0.55829	-1.14037	0.342036	-1.4824		0	0	0	0	0	0	0	0	0	0	-1	1	0	0	0	1	0	0	0	0	-1	4	0	-1	0	2	0
PF00211	Guanylate_cyc	Adenylate and Guanylate cyclase catalytic domain	8	6	185	33	11	6	18	2	155	30	0.752966	2.22039	14.6089	2.70222	0.968405	4.33269	-0.488012	1.42728	-1.91529		1	0	7	2	0	7	0	-1	-2	0	1	-3	-4	-2	3	-2	18	0	3	22	0	48	59	0	31	47	96
PF00213	OSCP	ATP synthase delta (OSCP) subunit	2	0	39	36	1	3	4	2	34	27	0.311634	1.22505	3.20889	2.44889	1.65685	0.134303	-0.70327	0.146295	-0.849565		0	0	0	0	0	0	0	0	0	0	0	0	0	0	0	0	4	2	0	0	0	0	4	-5	0	-1	0
PF00215	OMPdecase	Orotidine 5'-phosphate decarboxylase / HUMPS family	2	3	23	33	0	2	1	2	22	28	0	0.789474	1.94222	2.53333	2.12136	0.121934	-0.837861	-0.138498	-0.699364		0	0	0	1	-1	0	0	0	0	0	0	1	0	0	-1	0	0	0	-1	1	0	0	1	0	0	0	0
PF00216	Bac_DNA_binding	Bacterial DNA-binding protein	4	2	46	52	0	4	2	4	46	42	0	1.02975	4.05333	3.88444	4.42718	0.00372714	-1.45135	0.0216738	-1.47303		0	1	0	0	0	0	0	0	0	0	0	0	0	0	-1	1	8	1	-2	-2	-1	1	-1	2	-2	0	-1
PF00217	ATP-gua_Ptrans	ATP:guanido phosphotransferase, C-terminal catalytic domain	5	1	40	57	7	4	6	4	29	48	2.36842	0.910931	2.95556	4.39111	5.95345	0.0377998	1.83302	-0.0727088	1.90573		0	0	3	0	1	0	0	0	0	0	2	0	-1	1	0	0	6	0	0	0	-5	6	14	0	0	0	0
PF00218	IGPS	Indole-3-glycerol phosphate synthase	4	3	34	55	2	2	4	3	32	50	0.657895	0.446872	3.04	4.47556	0.386728	1.49059	-0.272439	-0.653404	0.380965		0	-1	-1	1	0	2	0	0	0	0	1	0	0	0	0	0	-2	1	0	0	-2	0	2	-1	0	0	0
PF00221	Lyase_aromatic	Aromatic amino acid lyase	1	6	13	33	1	5	0	2	12	30	0.986842	1.85033	1.01333	2.70222	0.00019027	2.10781	-0.00480614	0.834016	-0.838823		0	-1	0	1	0	0	0	0	0	0	-1	0	-1	-1	0	0	-1	0	-1	0	0	0	0	0	0	0	0
PF00223	PsaA_PsaB	Photosystem I psaA/psaB protein	4	7	17	51	2	6	0	6	19	44	1.24654	1.42105	1.60444	4.22222	0.105586	0.809578	0.127712	0.433863	-0.306151		0	-1	0	0	-1	0	0	0	1	-1	-1	0	2	0	-1	1	-1	1	-1	0	0	0	0	0	0	-1	1
PF00224	PK	Pyruvate kinase, barrel domain	5	6	171	30	11	3	15	3	141	28	0.83502	1.14601	13.1733	2.61778	0.389262	0.0604636	-0.273527	0.0937918	-0.367319		0	0	3	2	1	-2	1	1	-1	0	0	-3	-2	0	0	-1	0	0	-1	17	14	30	43	14	9	7	5
PF00225	Kinesin	Kinesin motor domain	8	7	235	0	18	0	20	1	194	6	0.996065	0	18.0711	0.591111	0.000303465	0.645631	-0.00607844	-0.375018	0.36894		5	11	6	-8	-3	0	-2	5	0	-3	29	-18	3	0	-4	1	63	0	-1	68	23	120	144	32	81	15	16
PF00226	DnaJ	DnaJ domain	9	9	236	0	16	3	21	0	197	6	0.869145	5.92105	18.4089	0.506667	0.34213	13.0018	-0.252897	3.50697	-3.75986		1	-24	-8	62	16	10	2	3	0	-3	-31	-15	-21	3	-14	-8	131	25	-20	165	66	288	318	31	155	40	55
PF00227	Proteasome	Proteasome subunit	8	7	233	0	19	0	20	0	192	7	1.06132	0	17.9022	0.591111	0.0729718	0.645631	0.103993	-0.375018	0.479011		-2	-3	2	2	0	-1	-1	0	0	1	6	2	1	1	-2	0	-10	4	-2	34	19	27	61	16	16	20	21
PF00229	TNF	TNF(Tumour Necrosis Factor) family	0	0	0	0	0	0	0	0	0	0	0	0	0	0	0	0	FALSE	FALSE	FALSE		0	0	0	0	0	0	0	0	0	0	0	0	0	0	0	0	0	0	0	0	0	0	0	0	0	0	0
PF00230	MIP	Major intrinsic protein	5	8	159	19	11	4	15	1	129	20	0.904605	2.25564	12.16	1.77333	0.120078	3.00935	-0.137302	1.08205	-1.21935		-1	-1	-1	5	0	4	0	0	-2	3	-4	0	-2	1	0	-1	23	-1	0	47	46	45	48	30	23	3	1
PF00231	ATP-synt	ATP synthase	4	1	45	43	2	2	3	1	43	35	0.514874	0.657895	3.88444	3.04	0.994689	0.386728	-0.496755	-0.272439	-0.224317		0	-1	0	1	0	0	0	0	0	0	4	0	0	0	0	0	1	1	0	3	-3	0	27	-3	0	0	0
PF00232	Glyco_hydro_1	Glycosyl hydrolase family 1	3	3	49	62	1	8	7	3	41	52	0.246711	1.72249	4.05333	4.64444	2.50746	2.6173	-0.945739	0.975908	-1.92165		0	-2	0	7	0	0	0	0	-1	1	-1	0	0	0	0	0	6	0	0	8	-5	0	5	-6	0	0	0
PF00233	PDEase_I	3'5'-cyclic nucleotide phosphodiesterase	8	9	222	0	16	3	21	0	183	6	0.928793	5.92105	17.2267	0.506667	0.0947684	13.0018	-0.120216	3.50697	-3.62718		2	4	27	-2	1	-7	-1	1	0	0	-2	-3	-2	-2	2	-1	13	-1	2	46	23	50	64	24	34	43	93
PF00234	Tryp_alpha_amyl	Protease inhibitor/seed storage/LTP family	0	0	0	0	0	0	0	0	0	0	0	0	0	0	0	0	FALSE	FALSE	FALSE		0	0	0	0	0	0	0	0	0	0	0	0	0	0	0	0	0	0	0	0	0	0	0	0	0	0	0
PF00235	Profilin	Profilin	3	0	25	37	3	2	1	2	22	31	1.54462	0.717703	1.94222	2.78667	0.622598	0.241284	0.366447	-0.205317	0.571764		0	1	0	0	0	1	0	0	0	0	0	0	0	0	0	0	1	0	0	2	0	-1	2	-2	0	0	0
PF00237	Ribosomal_L22	Ribosomal protein L22p/L17e	4	3	46	58	4	3	4	3	39	50	1.10159	0.670308	3.63111	4.47556	0.0406136	0.528736	0.075573	-0.330554	0.406127		-1	-1	1	0	0	-1	0	0	1	0	0	0	0	0	0	0	1	1	0	0	-1	1	14	-2	0	0	-1
PF00238	Ribosomal_L14	Ribosomal protein L14p/L23e	6	1	40	41	5	1	2	1	35	38	1.60028	0.303644	3.12444	3.29333	1.21635	1.74026	0.568512	-0.727912	1.29642		0	0	0	1	0	0	0	0	1	-1	1	0	0	0	0	1	1	1	0	4	-2	0	14	-3	0	0	0
PF00239	Resolvase	Resolvase, N terminal domain	0	0	3	16	0	2	0	4	3	10	0	1.69173	0.253333	1.18222	0.276699	0.610813	-0.222665	0.362028	-0.584694		0	0	0	0	0	0	0	0	0	0	0	0	0	0	0	0	0	0	0	0	0	0	0	0	0	0	0
PF00240	ubiquitin	Ubiquitin family	7	8	230	3	16	1	20	0	191	9	0.89798	1.31579	17.8178	0.76	0.201247	0.0820232	-0.184611	0.110937	-0.295548		0	-17	0	20	7	4	-2	1	0	-1	-8	-8	2	0	-7	-3	71	15	-13	73	26	75	85	22	45	12	12
PF00241	Cofilin_ADF	Cofilin/tropomyosin-type actin-binding protein	5	4	52	56	3	4	2	3	48	49	0.710526	0.910931	4.22222	4.39111	0.384426	0.0377998	-0.271448	-0.0727088	-0.198739		-1	-2	0	5	-1	1	0	0	0	0	2	1	0	2	0	0	-1	0	0	7	0	-1	13	-4	0	0	4
PF00244	37694	14-3-3 protein	5	4	67	61	9	6	2	2	57	53	1.80642	1.29187	4.98222	4.64444	3.49619	0.428247	1.21105	0.290009	0.921043		0	0	0	0	0	1	0	0	0	0	-1	1	-1	1	-1	0	6	1	-1	1	1	-8	5	0	1	0	0
PF00245	Alk_phosphatase	Alkaline phosphatase	1	5	14	30	3	4	0	3	11	25	3.22967	1.69173	0.928889	2.36444	4.94605	1.22163	1.58252	0.57018	1.01234		0	0	1	0	0	0	0	0	0	0	-1	0	-1	0	0	-1	-1	-1	0	0	0	0	0	0	0	0	0
PF00246	Peptidase_M14	Zinc carboxypeptidase	8	7	169	33	12	3	17	2	139	34	0.910931	0.986842	13.1733	3.04	0.113399	0.00057081	-0.132941	-0.00835797	-0.124583		1	1	-3	1	4	6	0	0	-1	0	4	-3	-3	0	-2	-1	8	4	-3	19	7	21	29	1	11	6	4
PF00248	Aldo_ket_red	Aldo/keto reductase family	6	11	177	48	9	7	16	5	149	46	0.645933	1.62539	13.9333	4.30667	1.89878	1.81948	-0.774135	0.751106	-1.52524		16	-7	0	22	7	1	-1	1	-1	-1	-10	-6	-8	-10	-7	-2	26	-1	0	50	47	70	82	4	30	20	25
PF00249	Myb_DNA-binding	Myb-like DNA-binding domain	8	11	173	54	10	8	16	4	145	52	0.735534	1.69173	13.5956	4.72889	1.03303	2.44325	-0.509413	0.928003	-1.43742		7	-15	-9	46	12	12	-3	3	1	-1	11	-3	-14	-5	-4	-7	-24	4	-3	2	-3	4	15	2	3	11	14
PF00250	Forkhead	Forkhead domain	0	0	3	14	0	1	0	0	3	12	0	0.986842	0.253333	1.01333	0.276699	0.00019027	-0.222665	-0.00480614	-0.217859		0	0	0	0	0	0	0	0	0	0	0	0	0	0	0	0	0	0	0	0	0	0	0	0	0	0	0
PF00251	Glyco_hydro_32N	Glycosyl hydrolases family 32 N-terminal domain	2	5	21	56	1	6	1	10	19	40	0.592105	1.42105	1.68889	4.22222	0.305569	0.809578	-0.236264	0.433863	-0.670127		4	-1	0	0	0	0	0	0	0	0	-1	0	-1	-1	0	0	1	0	-1	0	0	3	0	-1	0	0	0
PF00252	Ribosomal_L16	Ribosomal protein L16p/L10e	5	3	39	39	3	4	1	2	38	34	0.910931	1.31579	3.29333	3.04	0.0283498	0.328093	-0.0623372	0.246582	-0.308919		0	0	1	1	0	0	0	0	1	-1	0	0	0	0	-1	1	3	0	-1	0	-3	0	13	-4	-1	0	5
PF00253	Ribosomal_S14	Ribosomal protein S14p/S29e	5	1	26	55	2	4	1	3	27	48	0.845865	0.928793	2.36444	4.30667	0.0609799	0.0236921	-0.094229	-0.0566683	-0.0375607		0	-1	0	1	0	0	0	0	1	0	0	0	0	1	0	1	0	1	0	-1	5	-1	3	0	1	0	1
PF00254	FKBP_C	FKBP-type peptidyl-prolyl cis-trans isomerase	7	11	236	0	15	4	21	0	196	7	0.818579	6.76692	18.3244	0.591111	0.654848	20.7752	-0.378424	5.28695	-5.66537		9	-2	-5	15	16	8	1	-1	0	-1	-3	-4	-14	-5	-7	-6	23	3	-3	69	57	82	127	19	45	19	16
PF00255	GSHPx	Glutathione peroxidase	5	5	60	71	6	6	4	4	50	61	1.31579	1.09312	4.56	5.48889	0.492139	0.051581	0.316076	0.0860089	0.230067		0	0	2	0	1	-1	0	0	0	0	4	1	-1	0	0	-1	-2	2	-1	2	1	-1	9	-4	0	-1	1
PF00256	0	0	0	0	0	0	0	0	0	0	0	0	0	0	0	0	0	0	FALSE	FALSE	FALSE		0	0	0	0	0	0	0	0	0	0	0	0	0	0	0	0	0	0	0	0	0	0	0	0	0	0	0
PF00257	Dehydrin	Dehydrin	0	0	1	6	0	0	0	0	1	6	0	0	0.0844444	0.506667	0.092233	0.553398	-0.118411	-0.340148	0.221736		0	0	0	0	0	0	0	0	0	0	0	0	0	0	0	0	0	0	0	0	0	0	0	0	0	0	0
PF00258	Flavodoxin_1	Flavodoxin	6	9	170	22	12	5	16	2	140	23	0.910931	2.36842	13.1733	2.11111	0.113399	4.25246	-0.132941	1.40679	-1.53973		0	-1	-1	4	5	1	0	0	-1	0	-2	1	-1	-1	-2	-2	10	2	-1	12	5	34	30	6	12	9	11
PF00259	0	0	0	0	0	0	0	0	0	0	0	0	0	0	0	0	0	0	FALSE	FALSE	FALSE		0	0	0	0	0	0	0	0	0	0	0	0	0	0	0	0	0	0	0	0	0	0	0	0	0	0	0
PF00261	Tropomyosin	Tropomyosin	0	0	16	46	0	3	0	5	14	35	0	0.888158	1.18222	3.37778	1.29126	0.0458534	-0.592073	-0.0806904	-0.511383		0	0	0	0	0	0	0	0	0	0	0	0	0	0	0	0	0	0	0	-1	-1	0	1	0	0	0	0
PF00262	Calreticulin	Calreticulin family	3	3	50	41	2	6	6	0	40	36	0.514874	1.97368	3.88444	3.04	0.994689	3.10699	-0.496755	1.10815	-1.6049		0	0	0	3	0	0	0	0	-1	0	1	-1	-1	0	0	0	4	0	0	9	-2	-1	7	-10	-1	0	0
PF00263	Secretin	Bacterial type II and III secretion system protein	0	0	2	15	0	3	0	4	2	8	0	2.96053	0.168889	1.01333	0.184466	4.1771	-0.175508	1.38749	-1.563		0	0	0	0	0	0	0	0	0	0	0	0	0	0	0	0	0	0	0	0	0	0	0	0	0	0	0
PF00264	Tyrosinase	Common central domain of tyrosinase	5	6	40	52	2	8	5	3	37	45	0.56391	1.97368	3.54667	4.05333	0.73362	4.14266	-0.407033	1.37866	-1.7857		19	-1	0	9	1	0	0	0	0	0	1	0	-1	-6	-1	-1	3	0	-1	6	-3	0	1	-3	1	3	0
PF00265	TK	Thymidine kinase	1	3	15	46	2	4	2	6	12	35	1.69173	1.15533	1.18222	3.46222	0.610813	0.090494	0.362028	0.117163	0.244866		0	0	0	-1	0	0	0	0	0	0	1	0	-1	0	0	0	-1	0	0	0	1	0	0	0	0	0	0
PF00266	Aminotran_5	Aminotransferase class-V	8	8	176	37	12	5	16	3	147	35	0.871811	1.55817	13.7644	3.20889	0.24549	1.08037	-0.20742	0.524889	-0.732309		3	2	-2	-1	1	5	-1	1	-1	0	3	-1	-1	-2	1	0	9	-1	0	20	15	52	66	6	18	12	15
PF00268	Ribonuc_red_sm	Ribonucleotide reductase, small chain	7	2	54	49	6	2	5	0	47	46	1.3664	0.514874	4.39111	3.88444	0.637777	0.994689	0.372105	-0.496755	0.86886		1	-1	2	1	1	-1	0	0	0	0	0	0	1	0	0	0	5	1	0	5	0	-1	21	-3	-3	0	2
PF00270	DEAD	DEAD/DEAH box helicase	9	10	228	8	16	3	21	0	189	15	0.902256	2.36842	17.7333	1.26667	0.18385	2.55148	-0.175168	0.957853	-1.13302		-13	-9	-13	26	12	11	-2	2	-4	2	-13	2	-19	15	-11	-7	46	1	-2	169	58	187	271	36	113	78	81
PF00271	Helicase_C	Helicase conserved C-terminal domain	8	11	228	8	16	3	21	0	188	16	0.906573	2.22039	17.6489	1.35111	0.167164	2.16635	-0.165805	0.850593	-1.0164		-11	-16	-16	44	21	16	-1	3	-7	4	-18	-5	-26	15	-20	-8	51	4	-6	169	59	185	265	35	113	78	81
PF00274	Glycolytic	Fructose-bisphosphate aldolase class-I	6	8	59	57	5	8	6	1	54	53	0.986842	1.75439	5.06667	4.56	0.000951349	2.8011	-0.0108199	1.02595	-1.03677		1	-1	-1	2	0	1	-1	0	0	0	-1	0	-1	-2	-1	3	6	1	-1	-4	-5	3	-2	1	0	0	1
PF00275	EPSP_synthase	EPSP synthase (3-phosphoshikimate 1-carboxyvinyltransferase)	6	0	34	36	6	3	2	2	32	28	2.08978	1.18421	2.87111	2.53333	3.67349	0.093113	1.2574	0.11904	1.13836		0	0	1	1	0	0	1	0	1	0	1	0	0	0	0	0	0	1	0	1	0	0	1	-1	0	0	-1
PF00276	Ribosomal_L23	Ribosomal protein L23	1	6	45	58	2	3	3	4	38	55	0.577664	0.602141	3.46222	4.98222	0.671627	0.857557	-0.384592	-0.450478	0.065886		-1	0	-1	-1	0	0	0	0	0	0	0	0	0	0	-1	0	-1	1	-1	2	-1	-2	8	0	0	0	-1
PF00278	Orn_DAP_Arg_deC	Pyridoxal-dependent decarboxylase, C-terminal sheet domain	5	2	53	59	6	2	7	4	41	53	1.48026	0.415512	4.05333	4.81333	1.01078	1.79042	0.502082	-0.742623	1.24471		0	0	0	2	2	0	1	0	0	0	1	0	0	1	0	0	-1	0	-1	0	-1	0	1	-3	0	2	0
PF00280	potato_inhibit	Potato inhibitor I family	3	6	28	57	2	5	4	3	23	49	0.877193	1.13866	2.28	4.39111	0.0373201	0.0914782	-0.0722116	0.11787	-0.190082		-1	-1	-1	4	1	0	0	0	1	0	0	0	-1	0	-1	0	-1	0	0	-1	-1	-1	0	0	0	-1	1
PF00281	Ribosomal_L5	Ribosomal protein L5	5	0	35	40	3	1	2	0	33	36	1.01504	0.328947	2.95556	3.04	0.000724703	1.49149	0.00942883	-0.653676	0.663105		1	0	0	1	0	0	0	0	1	0	0	0	0	0	0	0	2	1	0	1	1	-3	4	-3	0	0	0
PF00282	Pyridoxal_deC	Pyridoxal-dependent decarboxylase conserved domain	7	2	63	69	3	6	6	4	57	59	0.56391	1.12782	5.32	5.32	1.10043	0.0941786	-0.531399	0.119798	-0.651197		0	0	-1	3	2	2	0	0	1	0	0	1	-2	0	0	0	1	1	0	0	-2	2	3	-1	-2	1	-1
PF00283	Cytochrom_B559	Cytochrome b559, alpha (gene psbE) and beta (gene psbF)subunits	0	0	9	28	0	3	0	2	8	20	0	1.61483	0.675556	1.85778	0.737864	0.758652	-0.40855	0.415951	-0.824501		0	0	0	0	0	0	0	0	0	0	0	0	0	0	0	0	0	0	0	0	0	5	4	-7	1	0	0
PF00284	Cytochrom_B559a	Lumenal portion of Cytochrome b559, alpha (gene psbE) subunit	0	0	0	17	0	1	0	2	0	13	0	0.789474	0	1.26667	0	0.0609669	FALSE	-0.094218	FALSE		0	0	0	0	0	0	0	0	0	0	0	0	0	0	0	0	0	0	0	0	0	0	0	0	0	0	0
PF00285	Citrate_synt	Citrate synthase, C-terminal domain	4	2	50	47	3	6	4	3	44	38	0.740132	1.73299	4.05333	3.46222	0.297362	2.00809	-0.232442	0.805591	-1.03803		0	0	0	1	0	0	0	0	-1	1	2	0	0	0	0	0	3	-1	0	6	-7	0	1	-9	0	0	-1
PF00288	GHMP_kinases_N	GHMP kinases N terminal domain	7	6	69	71	6	6	10	2	59	63	1.02975	1.09312	5.82667	5.48889	0.0055907	0.051581	0.0266888	0.0860089	-0.0593201		0	-2	-1	8	1	2	0	1	-1	1	2	0	-1	0	-1	0	-4	0	1	0	-2	2	1	-1	-1	-1	0
PF00289	Biotin_carb_N	Biotin carboxylase, N-terminal domain	5	4	165	25	13	0	15	2	133	25	1.04018	0	12.4978	2.28	0.0218802	2.49029	0.0543315	-0.941003	0.995334		1	0	0	1	0	0	-1	0	-1	1	1	0	0	0	0	0	-1	-1	1	9	2	23	23	4	5	6	9
PF00290	Trp_syntA	Tryptophan synthase alpha chain	2	1	32	24	3	1	3	0	27	18	1.18421	0.657895	2.53333	1.52	0.093113	0.193364	0.11904	-0.18037	0.299409		0	0	0	0	0	0	0	0	0	0	0	0	1	0	0	0	-1	0	1	-1	-3	1	5	0	0	0	0
PF00291	PALP	Pyridoxal-phosphate dependent enzyme	8	8	235	0	16	3	21	0	196	5	0.873151	7.10526	18.3244	0.422222	0.320023	16.6149	-0.242912	4.33923	-4.58215		2	-3	-3	15	2	2	-1	3	0	0	3	-1	-6	-1	-2	0	5	1	-1	18	14	37	44	7	15	10	20
PF00292	PAX	'Paired box' domain	0	0	0	0	0	0	0	0	0	0	0	0	0	0	0	0	FALSE	FALSE	FALSE		0	0	0	0	0	0	0	0	0	0	0	0	0	0	0	0	0	0	0	0	0	0	0	0	0	0	0
PF00293	NUDIX	NUDIX domain	5	8	235	0	16	2	21	0	193	6	0.885391	3.94737	18.0711	0.506667	0.257608	4.69901	-0.213413	1.52028	-1.73369		-1	-14	-2	17	4	3	-2	0	-1	1	-5	0	0	1	-3	-1	0	0	0	17	25	38	43	7	12	18	18
PF00294	PfkB	pfkB family carbohydrate kinase	5	6	177	30	10	4	15	4	148	26	0.72651	1.57895	13.7644	2.53333	1.11853	0.917484	-0.537251	0.470908	-1.00816		0	-3	-3	6	0	2	0	1	0	1	0	-2	-1	0	-3	0	4	0	-1	16	10	21	37	5	10	12	7
PF00295	Glyco_hydro_28	Glycosyl hydrolases family 28	4	2	50	47	4	3	4	8	43	35	1.00784	0.826193	3.96889	3.63111	0.000264452	0.119092	0.00567168	-0.136664	0.142336		0	0	0	5	1	0	0	0	0	0	0	0	-1	2	0	-1	3	0	0	0	-2	0	1	-1	0	0	0
PF00296	Bac_luciferase	Luciferase-like monooxygenase	0	0	0	0	0	0	0	0	0	0	0	0	0	0	0	0	FALSE	FALSE	FALSE		0	0	0	0	0	0	0	0	0	0	0	0	0	0	0	0	0	0	0	0	0	0	0	0	0	0	0
PF00297	Ribosomal_L3	Ribosomal protein L3	4	1	51	47	2	5	5	2	46	38	0.464396	1.48026	4.30667	3.37778	1.34473	0.84232	-0.608709	0.445227	-1.05394		0	0	0	2	1	0	0	0	1	0	0	0	0	0	0	0	4	-1	0	6	0	-1	18	-3	0	0	0
PF00298	Ribosomal_L11	Ribosomal protein L11, RNA binding domain	4	4	42	44	4	4	2	2	38	39	1.18421	1.15533	3.37778	3.46222	0.124151	0.090494	0.139916	0.117163	0.0227537		1	-1	0	0	1	0	0	0	0	-1	-1	0	0	0	0	0	3	1	-1	2	0	-1	16	-2	-1	0	-1
PF00300	His_Phos_1	Histidine phosphatase superfamily (branch 1)	6	10	153	63	9	10	16	4	126	57	0.750556	1.94133	11.9911	5.15111	0.810476	4.92145	-0.434176	1.57634	-2.01052		-2	-11	-4	19	8	7	-2	0	-3	1	-10	-2	-1	4	-6	-3	37	0	0	11	-9	30	46	-23	13	11	9
PF00301	Rubredoxin	Rubredoxin	3	1	46	40	4	0	3	3	40	34	1.10159	0	3.63111	3.12444	0.0406136	3.41262	0.075573	-1.1891	1.26467		0	0	0	0	0	0	2	0	0	-1	1	0	0	0	0	0	1	0	0	0	-1	3	2	-3	0	0	1
PF00303	Thymidylat_synt	Thymidylate synthase	2	1	42	42	1	3	2	1	39	36	0.288832	0.960171	3.46222	3.12444	1.90837	0.0053765	-0.776908	-0.0261576	-0.75075		0	0	0	2	1	0	0	0	0	0	0	0	0	0	0	-1	0	0	0	3	1	0	4	-2	0	0	0
PF00305	Lipoxygenase	Lipoxygenase	4	3	44	58	2	3	3	7	38	47	0.577664	0.657895	3.46222	4.56	0.671627	0.580092	-0.384592	-0.350396	-0.0341958		-1	-1	0	7	0	0	0	0	1	0	0	0	0	2	-1	0	5	0	0	0	0	-1	0	-2	0	-1	1
PF00306	ATP-synt_ab_C	ATP synthase alpha/beta chain, C terminal domain	5	1	63	71	3	5	6	4	57	59	0.56391	0.93985	5.32	5.32	1.10043	0.0208818	-0.531399	-0.053007	-0.478392		0	0	0	0	0	0	0	1	1	-1	3	0	0	0	0	1	0	1	0	2	-1	6	14	-10	0	1	0
PF00307	CH	Calponin homology (CH) domain	4	8	146	34	12	4	14	3	116	34	1.09312	1.28023	10.9778	3.12444	0.103162	0.265595	0.126059	0.217311	-0.0912517		4	-4	-2	15	0	5	0	0	0	-1	-1	-1	-4	-1	0	0	1	-1	0	9	7	11	23	2	12	1	1
PF00308	Bac_DnaA	Bacterial dnaA protein	0	0	4	24	0	1	0	7	4	16	0	0.514874	0.337778	1.94222	0.368932	0.497344	-0.264731	-0.318154	0.0534227		0	0	0	0	0	0	0	0	0	0	0	0	0	0	0	0	0	0	0	0	0	0	0	0	0	0	0
PF00309	Sigma54_AID	Sigma-54 factor, Activator interacting domain (AID)	0	0	0	0	0	0	0	0	0	0	0	0	0	0	0	0	FALSE	FALSE	FALSE		0	0	0	0	0	0	0	0	0	0	0	0	0	0	0	0	0	0	0	0	0	0	0	0	0	0	0
PF00310	GATase_2	Glutamine amidotransferases class-II	4	4	166	25	14	2	15	1	132	24	1.12782	0.947368	12.4133	2.11111	0.21975	0.00634398	0.194343	-0.0284847	0.222827		0	-1	1	0	0	-1	0	0	0	0	1	-1	2	0	0	0	1	-1	0	1	1	7	14	0	6	5	5
PF00311	PEPcase	Phosphoenolpyruvate carboxylase	5	1	41	30	3	4	5	3	36	21	0.866496	1.97368	3.46222	2.02667	0.0669791	2.07133	-0.0992031	0.823646	-0.922849		0	0	0	1	1	0	0	0	0	0	1	0	-1	0	0	0	1	1	0	0	-1	0	-1	0	0	0	0
PF00312	Ribosomal_S15	Ribosomal protein S15	4	2	59	58	4	2	6	3	52	50	0.816697	0.446872	4.89778	4.47556	0.178681	1.49059	-0.172302	-0.653404	0.481103		1	-2	0	1	0	0	0	0	0	0	1	-1	0	0	0	0	2	0	0	1	1	0	17	-4	-2	0	1
PF00313	CSD	'Cold-shock' DNA-binding domain	6	10	159	46	12	5	17	3	128	47	0.980036	1.18421	12.2444	4.22222	0.0052928	0.155188	-0.0259474	0.158875	-0.184822		-1	-4	1	16	3	-1	0	-1	0	0	-5	-1	-3	2	-1	-1	61	1	-1	79	39	53	79	16	23	4	3
PF00314	Thaumatin	Thaumatin family	2	2	15	16	0	3	1	2	14	12	0	2.53759	1.26667	1.18222	1.3835	3.0039	-0.620682	1.08059	-1.70127		0	0	0	0	0	0	0	0	0	1	-1	0	-1	0	0	0	5	0	0	0	-3	2	1	-7	0	0	0
PF00316	FBPase	Fructose-1-6-bisphosphatase, N-terminal domain	4	2	171	20	11	1	15	1	141	18	0.83502	0.623269	13.1733	1.60444	0.389262	0.247574	-0.273527	-0.208458	-0.0650696		0	-2	0	4	4	0	0	0	0	0	1	0	0	0	-1	0	1	0	0	12	7	14	18	8	7	5	8
PF00317	Ribonuc_red_lgN	Ribonucleotide reductase, all-alpha domain	4	2	45	51	4	5	6	4	37	40	1.10159	1.34569	3.63111	3.71556	0.0406136	0.480456	0.075573	0.311388	-0.235815		2	1	0	-1	1	0	0	0	0	0	0	0	0	-1	0	0	4	0	0	1	0	0	9	-1	0	0	1
PF00318	Ribosomal_S2	Ribosomal protein S2	7	2	39	32	4	2	2	0	36	30	1.24654	0.789474	3.20889	2.53333	0.211172	0.121934	0.189868	-0.138498	0.328366		1	-1	0	0	0	0	0	0	1	-1	1	0	1	0	0	1	1	1	0	1	0	0	8	-6	1	1	0
PF00319	SRF-TF	SRF-type transcription factor (DNA-binding and dimerisation domain)	0	0	15	17	1	1	1	2	13	12	0.845865	0.845865	1.18222	1.18222	0.0304899	0.0304899	-0.0648036	-0.0648036	0		0	0	0	0	0	0	0	0	0	0	0	0	0	0	0	0	0	0	0	0	0	0	0	0	0	0	0
PF00320	GATA	GATA zinc finger	0	0	25	30	2	0	1	3	21	26	1.07656	0	1.85778	2.44889	0.0118013	2.67476	0.0392949	-0.991609	1.0309		0	0	0	0	0	0	0	0	0	0	0	0	0	0	0	0	0	0	0	0	0	0	2	0	0	0	0
PF00324	AA_permease	Amino acid permease	4	6	155	25	10	1	16	4	124	24	0.845865	0.422932	11.8222	2.36444	0.304899	0.857272	-0.235953	-0.45038	0.214427		-2	3	0	0	-1	0	-1	0	0	1	0	-1	-3	1	-1	0	6	0	0	7	4	10	16	0	0	4	5
PF00325	Crp	Bacterial regulatory proteins, crp family	0	0	1	10	0	1	0	4	1	4	0	1.48026	0.0844444	0.675556	0.092233	0.168464	-0.118411	0.166546	-0.284958		0	0	0	0	0	0	0	0	0	0	0	0	0	0	0	0	0	0	0	0	0	0	0	0	0	0	0
PF00326	Peptidase_S9	Prolyl oligopeptidase family	7	7	233	0	15	3	21	0	194	4	0.826193	8.88158	18.1556	0.337778	0.59546	22.0463	-0.356236	5.57488	-5.93111		2	-5	0	11	3	1	0	0	1	-2	-1	0	-2	-1	-5	0	12	1	-1	53	27	45	76	8	23	21	16
PF00327	Ribosomal_L30	Ribosomal protein L30p/L7e	1	3	38	42	5	5	1	1	32	35	1.79426	1.64474	2.78667	3.04	1.89708	1.36489	0.773643	0.614944	0.158699		0	0	0	1	-1	0	0	-1	-1	0	0	0	0	0	0	0	0	0	0	2	0	-1	13	-1	0	0	0
PF00328	His_Phos_2	Histidine phosphatase superfamily (branch 2)	4	4	161	34	11	1	17	3	128	33	0.898367	0.328947	12.2444	3.04	0.13725	1.49149	-0.148112	-0.653676	0.505564		-3	-2	0	4	1	0	0	0	0	1	0	0	0	4	0	-2	0	-1	0	2	3	12	12	0	8	3	4
PF00329	Complex1_30kDa	Respiratory-chain NADH dehydrogenase, 30 Kd subunit	1	5	2	27	0	2	0	5	3	24	0	0.816697	0.253333	2.44889	0.276699	0.0893403	-0.222665	-0.116329	-0.106337		0	0	0	0	-1	0	0	0	1	-1	-1	0	0	0	-1	0	-1	0	0	0	0	0	0	0	0	0	0
PF00330	Aconitase	Aconitase family (aconitate hydratase)	3	1	53	37	3	3	3	1	48	31	0.696594	1.1102	4.30667	2.70222	0.430808	0.0355598	-0.291076	0.0703627	-0.361438		0	-1	0	0	0	0	0	0	0	0	2	0	1	0	0	0	1	0	0	0	-4	13	1	-5	0	0	0
PF00331	Glyco_hydro_10	Glycosyl hydrolase family 10	4	3	24	36	2	2	7	3	17	33	0.986842	0.657895	2.02667	3.04	0.00038054	0.386728	-0.00681238	-0.272439	0.265626		0	-2	0	2	1	0	0	0	0	0	-1	0	2	0	0	0	-1	1	0	0	0	-1	1	-1	0	0	0
PF00332	Glyco_hydro_17	Glycosyl hydrolases family 17	1	4	9	28	0	5	0	0	9	25	0	2.36842	0.76	2.11111	0.830097	4.25246	-0.440998	1.40679	-1.84778		0	-1	0	4	0	0	0	0	0	-1	-1	0	-1	0	0	0	0	0	0	0	7	0	0	0	0	0	0
PF00333	Ribosomal_S5	Ribosomal protein S5, N-terminal domain	6	2	34	33	2	3	5	0	32	29	0.640114	1.22505	3.12444	2.44889	0.439915	0.134303	-0.294852	0.146295	-0.441147		0	0	-1	-1	2	0	0	0	1	0	0	1	1	0	0	0	1	1	0	0	-2	0	13	-5	1	0	0
PF00334	NDK	Nucleoside diphosphate kinase	5	3	165	24	13	2	15	3	134	21	1.0332	0.986842	12.5822	2.02667	0.0150399	0.00038054	0.0446037	-0.00681238	0.0514161		1	0	0	0	-1	1	0	0	0	0	0	-1	2	-1	0	0	2	1	0	7	10	10	28	2	6	2	2
PF00335	Tetraspanin	Tetraspanin family	3	6	35	68	1	5	2	8	33	57	0.338346	0.910931	2.95556	5.48889	1.40963	0.0472497	-0.628715	-0.0820116	-0.546703		-1	0	0	2	0	2	1	-1	0	0	-1	-1	-1	0	0	0	-1	0	0	0	1	0	9	0	0	0	0
PF00337	Gal-bind_lectin	Galactoside-binding lectin	0	0	0	0	0	0	0	0	0	0	0	0	0	0	0	0	FALSE	FALSE	FALSE		0	0	0	0	0	0	0	0	0	0	0	0	0	0	0	0	0	0	0	0	0	0	0	0	0	0	0
PF00338	Ribosomal_S10	Ribosomal protein S10p/S20e	5	2	39	51	5	3	3	0	34	46	1.60028	0.772311	3.12444	3.88444	1.21635	0.218717	0.568512	-0.193807	0.762318		0	0	0	0	0	-1	0	0	1	-1	0	0	2	1	0	0	2	1	0	3	0	-1	8	-2	1	0	-1
PF00339	Arrestin_N	Arrestin (or S-antigen), N-terminal domain	5	6	39	57	5	5	4	6	31	49	1.69173	1.07656	2.95556	4.64444	1.52703	0.0295033	0.664425	0.0636763	0.600749		1	-1	0	0	3	0	0	1	1	0	2	-1	-1	-1	0	-1	-1	0	0	0	0	0	0	0	0	0	4
PF00342	PGI	Phosphoglucose isomerase	5	2	50	51	3	4	4	5	46	41	0.710526	1.02975	4.22222	3.88444	0.384426	0.00372714	-0.271448	0.0216738	-0.293122		0	0	1	1	1	0	0	0	0	0	-1	0	0	0	0	0	1	1	-1	0	-1	0	2	-1	0	1	0
PF00343	Phosphorylase	Carbohydrate phosphorylase	1	0	23	28	0	1	0	5	23	19	0	0.493421	1.94222	2.02667	2.12136	0.565969	-0.837861	-0.344991	-0.49287		0	0	0	0	0	0	0	0	0	0	0	0	0	0	0	0	5	0	0	0	-7	5	11	-4	0	0	0
PF00344	SecY	SecY translocase	4	0	37	43	0	2	2	1	37	35	0	0.657895	3.29333	3.04	3.59709	0.386728	-1.23746	-0.272439	-0.965026		0	1	0	0	0	0	0	0	1	0	0	0	0	0	0	0	1	1	0	0	-2	0	6	-1	0	0	0
PF00345	PapD_N	Pili and flagellar-assembly chaperone, PapD N-terminal domain	0	0	2	15	0	1	0	0	2	14	0	0.845865	0.168889	1.18222	0.184466	0.0304899	-0.175508	-0.0648036	-0.110704		0	0	0	0	0	0	0	0	0	0	0	0	0	0	0	0	0	0	0	0	0	0	0	0	0	0	0
PF00346	Complex1_49kDa	Respiratory-chain NADH dehydrogenase, 49 Kd subunit	0	4	5	31	0	2	1	5	4	27	0	0.740132	0.422222	2.70222	0.461165	0.198241	-0.303574	-0.183001	-0.120573		0	0	0	-1	0	0	0	0	0	-1	-1	0	0	0	0	0	-1	0	0	0	0	0	0	0	0	0	0
PF00347	Ribosomal_L6	Ribosomal protein L6	4	2	37	47	5	1	2	1	34	45	1.64474	0.257437	3.04	3.88444	1.36489	2.33485	0.614944	-0.897885	1.51283		1	-1	0	0	0	0	0	0	1	-1	1	0	0	0	0	0	0	1	0	2	-3	0	10	-3	0	0	0
PF00348	polyprenyl_synt	Polyprenyl synthetase	6	6	60	79	5	7	8	3	52	71	0.986842	1.1202	5.06667	6.24889	0.000951349	0.0978302	-0.0108199	0.12237	-0.13319		1	-1	-1	2	1	1	1	0	1	-1	0	0	-1	0	0	0	-2	-1	0	4	0	0	12	-2	-1	1	-1
PF00349	Hexokinase_1	Hexokinase	0	0	8	24	0	3	1	2	7	17	0	1.86981	0.675556	1.60444	0.737864	1.30935	-0.40855	0.597718	-1.00627		0	0	0	0	0	0	0	0	0	0	0	0	0	0	0	0	0	0	0	0	0	0	0	0	0	0	0
PF00350	Dynamin_N	Dynamin family	7	10	233	0	16	3	21	0	193	7	0.885391	5.07519	18.0711	0.591111	0.257608	10.4334	-0.213413	2.90743	-3.12085		2	1	3	2	1	-1	0	-1	-1	0	-2	-3	-4	-2	-2	-1	12	3	-3	31	15	35	43	10	20	12	11
PF00351	Biopterin_H	Biopterin-dependent aromatic amino acid hydroxylase	1	0	24	29	3	2	1	5	19	19	1.77632	0.986842	1.68889	2.02667	1.0985	0.00038054	0.530774	-0.00681238	0.537586		0	0	0	0	0	0	0	0	0	0	1	0	0	0	0	0	0	0	0	0	0	1	3	-2	0	0	0
PF00352	TBP	Transcription factor TFIID (or TATA-binding protein, TBP)	3	2	31	39	3	2	1	1	29	36	1.18421	0.640114	2.53333	3.12444	0.093113	0.439915	0.11904	-0.294852	0.413892		0	0	5	0	0	-1	0	0	0	0	0	0	1	0	0	0	1	-1	0	0	-1	1	1	-3	0	0	0
PF00353	HemolysinCabind	RTX calcium-binding nonapeptide repeat (4 copies)	0	0	8	26	0	4	0	4	7	17	0	2.25564	0.591111	1.77333	0.645631	3.00935	-0.375018	1.08205	-1.45706		0	0	0	0	0	0	0	0	0	0	0	0	0	0	0	0	0	0	0	0	0	0	0	0	0	0	0
PF00354	Pentaxin	Pentaxin family	0	0	14	38	1	3	0	3	12	31	0.986842	1.04489	1.01333	2.87111	0.00019027	0.00627279	-0.00480614	0.0283194	-0.0331255		0	0	0	0	0	0	0	0	0	0	0	0	0	0	0	0	0	0	0	0	0	0	0	0	0	0	0
PF00355	Rieske	Rieske [2Fe-2S] domain	7	10	172	27	11	6	14	2	146	27	0.814145	2.45009	13.5111	2.44889	0.506742	5.53684	-0.321889	1.73002	-2.0519		2	-3	-3	6	0	1	-1	2	-3	3	-1	-1	-2	-2	-2	0	13	2	-3	25	20	35	52	13	21	7	9
PF00356	LacI	Bacterial regulatory proteins, lacI family	0	0	2	23	0	3	0	7	2	13	0	1.77632	0.168889	1.68889	0.184466	1.0985	-0.175508	0.530774	-0.706281		0	0	0	0	0	0	0	0	0	0	0	0	0	0	0	0	0	0	0	0	0	0	0	0	0	0	0
PF00359	PTS_EIIA_2	Phosphoenolpyruvate-dependent sugar phosphotransferase system, EIIA 2	0	0	4	32	0	4	0	4	4	24	0	1.69173	0.337778	2.36444	0.368932	1.22163	-0.264731	0.57018	-0.834911		0	0	0	0	0	0	0	0	0	0	0	0	0	0	0	0	0	0	0	0	0	0	0	0	0	0	0
PF00360	PHY	Phytochrome region	1	5	12	33	1	2	1	2	11	32	0.986842	0.696594	1.01333	2.87111	0.00019027	0.287205	-0.00480614	-0.227666	0.22286		0	0	-1	0	0	2	0	-1	0	0	0	-1	0	0	0	0	-1	-1	0	0	0	0	0	0	0	0	0
PF00361	Proton_antipo_M	Proton-conducting membrane transporter	0	0	11	33	0	3	0	7	9	21	0	1.2688	0.76	2.36444	0.830097	0.184941	-0.440998	0.17577	-0.616768		0	0	0	0	0	0	0	0	0	0	0	0	0	0	0	0	0	0	0	0	0	0	0	0	0	0	0
PF00362	Integrin_beta	Integrin beta chain VWA domain	0	0	2	7	0	1	0	2	2	4	0	1.97368	0.168889	0.506667	0.184466	0.517832	-0.175508	0.326272	-0.501779		0	0	0	0	0	0	0	0	0	0	0	0	0	0	0	0	0	0	0	0	0	0	0	0	0	0	0
PF00364	Biotin_lipoyl	Biotin-requiring enzyme	7	8	170	30	11	3	15	2	142	31	0.829702	1.07656	13.2578	2.78667	0.417438	0.017702	-0.285487	0.0485873	-0.334075		-1	-2	-2	8	-1	1	1	0	-1	1	3	0	-4	2	0	0	-3	-2	1	22	14	18	54	11	13	7	12
PF00365	PFK	Phosphofructokinase	4	4	53	64	1	6	4	4	50	55	0.219298	1.20428	4.56	4.98222	3.03056	0.225173	-1.08773	0.19714	-1.28487		1	1	-1	0	0	1	0	0	0	0	0	-1	-1	0	0	0	6	0	-1	0	-3	4	3	-3	0	0	1
PF00366	Ribosomal_S17	Ribosomal protein S17	3	2	46	62	4	7	5	3	38	49	1.10159	1.59413	3.63111	4.39111	0.0406136	1.67466	0.075573	0.708551	-0.632978		0	-1	-1	0	1	0	0	0	1	0	0	0	0	0	0	0	2	0	0	1	0	0	8	-1	0	0	0
PF00368	HMG-CoA_red	Hydroxymethylglutaryl-coenzyme A reductase	2	0	23	23	1	2	2	1	21	20	0.514874	1.12782	1.94222	1.77333	0.497344	0.0313929	-0.318154	0.0658215	-0.383975		0	0	0	2	0	0	0	0	0	0	3	0	0	0	0	0	0	0	0	0	0	0	5	0	0	0	0
PF00370	FGGY_N	FGGY family of carbohydrate kinases, N-terminal domain	7	7	59	73	6	4	7	7	51	64	1.22505	0.667161	4.89778	5.99556	0.268606	0.721909	0.21877	-0.402833	0.621603		1	-1	-1	4	-1	1	1	0	-1	0	-1	-1	0	0	1	1	0	-1	1	0	-1	1	6	-2	0	0	0
PF00373	FERM_M	FERM central domain	2	2	18	37	2	2	1	4	16	32	1.39319	0.657895	1.43556	3.04	0.240072	0.386728	0.204708	-0.272439	0.477147		0	0	0	0	0	0	0	0	0	0	2	0	-1	1	0	0	-1	0	0	0	0	0	9	0	0	0	0
PF00375	SDF	Sodium:dicarboxylate symporter family	4	5	28	34	1	3	3	1	26	31	0.408348	1.1102	2.44889	2.70222	0.933433	0.0355598	-0.476289	0.0703627	-0.546652		0	-2	0	3	3	0	0	0	0	0	-1	-1	0	0	0	-1	1	2	-1	0	0	-1	3	-2	0	0	0
PF00376	MerR	MerR family regulatory protein	0	0	4	24	0	4	0	5	4	14	0	2.49307	0.337778	1.60444	0.368932	3.84496	-0.264731	1.30194	-1.56667		0	0	0	0	0	0	0	0	0	0	0	0	0	0	0	0	0	0	0	0	0	0	0	0	0	0	0
PF00378	ECH_1	Enoyl-CoA hydratase/isomerase	6	8	235	0	15	4	21	0	195	4	0.822368	11.8421	18.24	0.337778	0.624866	41.4566	-0.367295	9.91895	-10.2862		7	-4	-1	11	1	2	0	0	-1	0	-3	0	-3	-6	-2	0	9	1	-1	67	65	82	90	26	21	11	12
PF00380	Ribosomal_S9	Ribosomal protein S9/S16	4	1	52	54	2	6	2	1	49	46	0.464396	1.51176	4.30667	3.96889	1.34473	1.12358	-0.608709	0.538877	-1.14759		0	0	-1	0	0	0	0	0	1	0	0	0	0	0	0	1	2	1	0	2	0	-1	14	-2	0	1	0
PF00381	PTS-HPr	PTS HPr component phosphorylation site	0	0	0	0	0	0	0	0	0	0	0	0	0	0	0	0	FALSE	FALSE	FALSE		0	0	0	0	0	0	0	0	0	0	0	0	0	0	0	0	0	0	0	0	0	0	0	0	0	0	0
PF00382	TFIIB	Transcription factor TFIIB repeat	3	2	29	54	2	2	3	7	27	45	0.789474	0.455466	2.53333	4.39111	0.121934	1.41729	-0.138498	-0.631063	0.492566		0	-1	0	0	0	1	0	0	0	0	1	2	0	0	0	0	0	-1	0	1	0	0	0	-1	0	0	0
PF00383	dCMP_cyt_deam_1	Cytidine and deoxycytidylate deaminase zinc-binding region	8	8	165	25	14	3	17	1	134	27	1.09794	1.2688	12.7511	2.36444	0.132565	0.184941	0.145216	0.17577	-0.0305534		-2	-5	-1	4	1	1	1	-1	0	-1	-2	0	1	1	-1	0	6	-1	1	8	9	16	17	2	6	4	4
PF00384	Molybdopterin	Molybdopterin oxidoreductase	1	3	10	22	1	3	2	4	8	17	1.18421	1.69173	0.844444	1.77333	0.0310377	0.91622	0.0654226	0.47048	-0.405058		0	0	0	0	0	0	0	0	0	-1	-1	0	2	0	0	0	-1	0	0	0	0	0	0	0	0	0	0
PF00385	Chromo	Chromo (CHRromatin Organisation MOdifier) domain	6	8	166	29	15	2	16	3	132	31	1.20021	0.696594	12.4978	2.87111	0.54258	0.287205	0.335955	-0.227666	0.563621		-2	-16	6	22	0	-5	0	-1	-1	2	-1	-1	8	1	0	0	-1	0	1	5	0	4	10	2	7	3	3
PF00386	C1q	C1q domain	0	0	3	8	0	1	0	2	3	5	0	1.69173	0.253333	0.591111	0.276699	0.305407	-0.222665	0.236188	-0.458854		0	0	0	0	0	0	0	0	0	0	0	0	0	0	0	0	0	0	0	0	0	0	0	0	0	0	0
PF00387	PI-PLC-Y	Phosphatidylinositol-specific phospholipase C, Y domain	3	5	51	53	3	6	8	4	39	46	0.755879	1.42105	3.96889	4.22222	0.25692	0.809578	-0.213075	0.433863	-0.646938		0	-2	1	15	1	-1	0	0	0	0	0	0	-1	-1	-1	0	0	0	0	0	-2	0	1	-1	0	0	0
PF00388	PI-PLC-X	Phosphatidylinositol-specific phospholipase C, X domain	5	5	55	55	3	5	6	4	47	48	0.670308	1.13866	4.47556	4.39111	0.528736	0.0914782	-0.330554	0.11787	-0.448425		2	-2	1	15	3	-1	0	0	0	0	0	1	-1	-1	-1	0	0	0	0	0	-3	4	0	-1	0	0	0
PF00389	2-Hacid_dh	D-isomer specific 2-hydroxyacid dehydrogenase, catalytic domain	5	5	70	72	5	7	8	3	60	61	0.870743	1.29523	5.74222	5.40444	0.104128	0.509867	-0.12672	0.323127	-0.449846		1	-1	0	3	1	0	0	0	-1	1	-1	0	-1	0	0	-2	3	0	0	7	-10	5	8	-14	0	-1	0
PF00390	malic	Malic enzyme, N-terminal domain	6	3	53	55	5	6	3	2	49	46	1.13866	1.48026	4.39111	4.05333	0.0914782	1.01078	0.11787	0.502082	-0.384212		2	0	-2	0	0	2	0	0	0	-1	0	1	1	-1	1	0	1	0	0	-1	0	0	2	0	0	0	1
PF00391	PEP-utilizers	PEP-utilising enzyme, mobile domain	4	5	44	56	2	6	4	3	39	48	0.550796	1.39319	3.63111	4.30667	0.797014	0.720216	-0.429472	0.402225	-0.831696		1	-1	0	0	1	0	0	0	0	0	5	0	-1	-1	-1	0	7	-1	0	0	1	0	10	-3	0	0	1
PF00392	GntR	Bacterial regulatory proteins, gntR family	0	0	7	33	0	4	0	5	6	22	0	1.75439	0.506667	2.28	0.553398	1.40055	-0.340148	0.625928	-0.966076		0	0	0	0	0	0	0	0	0	0	0	0	0	0	0	0	0	0	0	0	0	0	0	0	0	0	0
PF00393	6PGD	6-phosphogluconate dehydrogenase, C-terminal domain	3	2	39	33	1	3	4	3	35	26	0.303644	1.22505	3.29333	2.44889	1.74026	0.134303	-0.727912	0.146295	-0.874207		0	0	0	-1	0	0	0	0	0	0	-1	0	0	0	0	1	1	1	0	0	-1	2	2	0	0	0	2
PF00394	Cu-oxidase	Multicopper oxidase	2	6	27	59	1	6	2	6	24	51	0.455466	1.24654	2.19556	4.81333	0.708646	0.316759	-0.398055	0.24142	-0.639475		0	-1	-1	0	2	0	0	0	0	0	-1	0	-1	-1	0	-1	0	1	0	1	-2	0	0	-1	-1	0	0
PF00395	SLH	S-layer homology domain	0	0	1	3	0	0	0	0	0	2	0	0	0	0.168889	0	0.184466	0	-0.175508	0.175508		0	0	0	0	0	0	0	0	0	0	0	0	0	0	0	0	0	0	0	0	0	0	0	0	0	0	0
PF00396	Granulin	Granulin	0	0	5	31	0	2	0	1	5	26	0	0.877193	0.422222	2.28	0.461165	0.0373201	-0.303574	-0.0722116	-0.231362		0	0	0	0	0	0	0	0	0	0	0	0	0	0	0	0	0	0	0	0	0	0	1	0	0	0	0
PF00397	WW	WW domain	8	10	144	77	8	10	13	8	123	67	0.696594	1.57895	11.4844	6.33333	1.14882	2.29371	-0.546994	0.886394	-1.43339		-5	-7	-10	23	1	24	-1	1	1	-2	-2	-8	-10	11	-4	-1	13	1	0	49	20	99	94	-2	51	6	15
PF00398	RrnaAD	Ribosomal RNA adenine dimethylase	4	1	54	51	3	6	3	2	46	42	0.725027	1.61483	4.13778	3.71556	0.339906	1.5173	-0.251902	0.661488	-0.91339		0	1	0	0	0	0	0	1	0	0	-1	0	0	0	0	0	4	1	0	0	-2	1	2	-2	0	1	0
PF00400	WD40	WD domain, G-beta repeat	10	9	0	0	3	1	1	0	6	8	5.07519	1.48026	0.591111	0.675556	10.4334	0.168464	2.90743	0.166546	2.74089		-22	14	24	-2	2	7	-5	6	-5	2	22	-36	-26	40	-9	-1	15	-15	9	0	0	0	0	0	0	0	0
PF00401	ATP-synt_DE	ATP synthase, Delta/Epsilon chain, long alpha-helix domain	0	0	9	16	0	1	0	0	9	13	0	0.910931	0.76	1.09778	0.830097	0.00944995	-0.440998	-0.0350059	-0.405992		0	0	0	0	0	0	0	0	0	0	0	0	0	0	0	0	0	0	0	2	-1	2	-2	-2	0	0	0
PF00403	HMA	Heavy-metal-associated domain	3	4	69	83	5	6	9	7	54	70	0.93985	0.922761	5.32	6.50222	0.0208818	0.0420881	-0.053007	-0.0770401	0.0240331		0	-1	0	5	1	0	0	0	0	0	0	-1	-1	0	0	0	1	0	-1	1	-1	0	3	-3	0	0	2
PF00404	Dockerin_1	Dockerin type I domain	0	0	0	0	0	0	0	0	0	0	0	0	0	0	0	0	FALSE	FALSE	FALSE		0	0	0	0	0	0	0	0	0	0	0	0	0	0	0	0	0	0	0	0	0	0	0	0	0	0	0
PF00405	Transferrin	Transferrin	0	0	4	8	0	0	1	0	3	8	0	0	0.337778	0.675556	0.368932	0.737864	-0.264731	-0.40855	0.143819		0	0	0	0	0	0	0	0	0	0	0	0	0	0	0	0	0	0	0	0	0	0	0	0	0	0	0
PF00406	ADK	Adenylate kinase	9	7	174	30	14	3	15	4	145	28	1.03618	1.1102	13.5111	2.70222	0.0191793	0.0355598	0.0506814	0.0703627	-0.0196813		1	2	-1	-2	0	2	-1	1	-2	2	2	-3	3	-2	-1	0	5	1	0	24	12	25	36	9	17	7	10
PF00408	PGM_PMM_IV	Phosphoglucomutase/phosphomannomutase, C-terminal domain	3	2	51	55	4	7	6	3	41	43	1.00784	1.80206	3.96889	3.88444	0.000264452	2.69649	0.00567168	0.997534	-0.991862		0	0	0	0	2	1	0	0	0	0	1	0	-2	0	0	0	0	-1	0	0	0	0	2	-1	0	0	0
PF00410	Ribosomal_S8	Ribosomal protein S8	3	0	38	52	3	4	1	1	35	42	0.986842	1.10159	3.04	3.63111	0.00057081	0.0406136	-0.00835797	0.075573	-0.083931		0	0	0	1	0	0	0	0	1	0	0	0	0	0	0	0	0	1	0	0	1	0	10	-2	0	0	1
PF00411	Ribosomal_S11	Ribosomal protein S11	3	2	45	43	2	2	3	2	40	38	0.550796	0.592105	3.63111	3.37778	0.797014	0.611138	-0.429472	-0.362151	-0.0673211		0	-1	0	0	0	0	0	0	1	-1	0	0	0	0	0	1	0	1	0	3	1	-2	14	-4	-2	0	0
PF00412	LIM	LIM domain	4	5	48	67	4	8	3	6	39	55	1.12782	1.55306	3.54667	5.15111	0.0627857	1.70273	0.0957466	0.716854	-0.621108		0	-2	0	7	0	0	0	1	-1	0	1	-1	-1	0	0	0	1	0	-1	1	-2	6	4	-5	0	0	0
PF00413	Peptidase_M10	Matrixin	2	4	24	47	2	4	3	7	21	38	0.986842	1.05263	2.02667	3.8	0.00038054	0.0114113	-0.00681238	0.0386126	-0.045425		0	0	0	2	-1	0	0	0	0	0	-1	0	0	0	-1	1	-1	0	0	0	0	2	1	0	1	0	0
PF00415	RCC1	Regulator of chromosome condensation (RCC1) repeat	7	11	236	0	17	2	21	0	194	9	0.936353	2.63158	18.1556	0.76	0.0797925	2.17331	-0.109256	0.852561	-0.961816		-1	-11	31	30	1	-8	-7	4	-1	0	-5	-9	-11	4	-2	-1	25	-2	2	66	56	98	147	21	80	26	31
PF00416	Ribosomal_S13	Ribosomal protein S13/S18	3	1	36	54	3	2	1	5	35	42	0.986842	0.503919	3.04	3.96889	0.00057081	1.06281	-0.00835797	-0.519168	0.51081		0	0	0	1	0	0	0	0	1	-1	0	0	0	0	0	0	3	0	0	0	0	1	8	-6	0	0	0
PF00417	0	0	0	0	0	0	0	0	0	0	0	0	0	0	0	0	0	0	FALSE	FALSE	FALSE		0	0	0	0	0	0	0	0	0	0	0	0	0	0	0	0	0	0	0	0	0	0	0	0	0	0	0
PF00418	Tubulin-binding	Tau and MAP protein, tubulin-binding repeat	0	0	0	0	0	0	0	0	0	0	0	0	0	0	0	0	FALSE	FALSE	FALSE		0	0	0	0	0	0	0	0	0	0	0	0	0	0	0	0	0	0	0	0	0	0	0	0	0	0	0
PF00420	Oxidored_q2	NADH-ubiquinone/plastoquinone oxidoreductase chain 4L	0	0	2	16	0	2	0	4	2	10	0	1.69173	0.168889	1.18222	0.184466	0.610813	-0.175508	0.362028	-0.537536		0	0	0	0	0	0	0	0	0	0	0	0	0	0	0	0	0	0	0	0	0	0	0	0	0	0	0
PF00421	PSII	Photosystem II protein	0	0	42	72	2	7	0	7	39	54	0.607287	1.35893	3.29333	5.15111	0.552269	0.718013	-0.339712	0.401432	-0.741144		0	0	0	0	0	0	0	0	0	0	0	0	0	0	0	0	0	0	0	0	0	0	0	0	0	0	1
PF00423	HN	Haemagglutinin-neuraminidase	0	0	0	0	0	0	0	0	0	0	0	0	0	0	0	0	FALSE	FALSE	FALSE		0	0	0	0	0	0	0	0	0	0	0	0	0	0	0	0	0	0	0	0	0	0	0	0	0	0	0
PF00425	Chorismate_bind	chorismate binding enzyme	4	3	52	56	4	2	8	4	44	49	0.910931	0.446872	4.39111	4.47556	0.0377998	1.49059	-0.0727088	-0.653404	0.580695		0	-1	0	0	0	0	0	0	0	1	0	0	1	1	-1	0	-1	0	1	1	-2	0	0	-1	0	0	0
PF00427	PBS_linker_poly	Phycobilisome Linker polypeptide	0	0	2	4	0	0	0	1	1	2	0	0	0.0844444	0.253333	0.092233	0.276699	-0.118411	-0.222665	0.104254		0	0	0	0	0	0	0	0	0	0	0	0	0	0	0	0	0	0	0	0	0	0	0	0	0	0	0
PF00428	Ribosomal_60s	60s Acidic ribosomal protein	6	3	161	22	12	3	14	1	133	20	0.966702	1.69173	12.4133	1.77333	0.0149285	0.91622	-0.0444302	0.47048	-0.514911		1	-2	0	2	0	2	0	0	0	1	1	0	0	-2	0	0	4	-1	0	26	20	23	45	13	9	3	5
PF00430	ATP-synt_B	ATP synthase B/B' CF(0)	2	3	24	44	2	5	1	6	22	34	1.02975	1.48026	1.94222	3.37778	0.00186357	0.84232	0.0152177	0.445227	-0.430009		0	0	0	0	0	0	0	0	0	-1	-1	0	0	0	0	0	2	1	-1	3	1	0	10	-7	1	0	0
PF00431	CUB	CUB domain	2	2	33	47	1	5	2	2	29	38	0.382003	1.48026	2.61778	3.37778	1.08886	0.84232	-0.527646	0.445227	-0.972873		0	0	-2	8	0	9	0	0	0	0	0	0	-1	0	0	0	0	0	0	0	0	0	1	-1	0	0	0
PF00432	Prenyltrans	Prenyltransferase and squalene oxidase repeat	3	4	61	64	8	3	8	6	44	55	1.82186	0.582399	4.39111	5.15111	3.20022	0.976937	1.13295	-0.490856	1.62381		0	-1	1	1	-1	0	0	0	0	-1	1	0	0	0	0	0	0	-1	0	0	-2	2	2	-3	-1	0	0
PF00433	Pkinase_C	Protein kinase C terminal domain	5	2	28	48	1	6	3	4	28	39	0.382003	1.65239	2.61778	3.63111	1.08886	1.66912	-0.527646	0.706911	-1.23456		1	0	0	1	0	0	0	0	0	1	1	0	-1	0	0	1	-1	0	0	0	0	0	1	0	0	0	-1
PF00435	Spectrin	Spectrin repeat	0	0	8	11	0	0	1	0	7	11	0	0	0.675556	0.928889	0.737864	1.01456	-0.40855	-0.50333	0.0947799		0	0	0	0	0	0	0	0	0	0	0	0	0	0	0	0	0	0	0	0	0	0	3	0	0	0	0
PF00436	SSB	Single-strand binding protein family	1	1	19	21	0	1	0	0	19	18	0	0.657895	1.60444	1.52	1.75243	0.193364	-0.731488	-0.18037	-0.551118		0	0	0	0	0	0	0	0	0	0	0	0	0	0	0	0	-1	1	0	0	0	0	0	0	0	0	0
PF00437	T2SSE	Type II/IV secretion system protein	0	0	19	50	0	6	0	8	17	33	0	1.73299	1.43556	3.46222	1.56796	2.00809	-0.676741	0.805591	-1.48233		0	0	0	0	0	0	0	0	0	0	0	0	0	0	0	0	0	0	0	1	0	0	1	0	1	0	0
PF00438	S-AdoMet_synt_N	S-adenosylmethionine synthetase, N-terminal domain	4	3	41	40	4	4	1	2	39	35	1.18421	1.28023	3.37778	3.12444	0.124151	0.265595	0.139916	0.217311	-0.0773945		2	0	0	1	0	0	0	0	0	0	0	1	0	-1	-2	0	6	-1	0	2	-1	-3	7	-1	0	0	-1
PF00439	Bromodomain	Bromodomain	7	8	223	0	15	1	19	0	190	7	0.849912	1.69173	17.6489	0.591111	0.43157	0.305407	-0.291393	0.236188	-0.527581		-2	-4	-2	3	0	6	0	-2	-3	3	11	0	0	3	-2	1	-13	9	-7	3	2	7	12	0	1	21	20
PF00440	TetR_N	Bacterial regulatory proteins, tetR family	0	0	0	0	0	0	0	0	0	0	0	0	0	0	0	0	FALSE	FALSE	FALSE		0	0	0	0	0	0	0	0	0	0	0	0	0	0	0	0	0	0	0	0	0	0	0	0	0	0	0
PF00441	Acyl-CoA_dh_1	Acyl-CoA dehydrogenase, C-terminal domain	6	4	173	26	12	2	15	2	143	25	0.8994	0.877193	13.3422	2.28	0.146527	0.0373201	-0.153739	-0.0722116	-0.0815277		2	0	0	2	0	1	0	0	0	0	2	0	-3	-2	-1	0	7	-2	1	31	25	41	30	10	11	5	4
PF00443	UCH	Ubiquitin carboxyl-terminal hydrolase	9	8	235	0	17	2	21	0	196	6	0.927723	3.94737	18.3244	0.506667	0.103861	4.69901	-0.126537	1.52028	-1.64682		2	-2	2	9	3	1	0	0	-2	1	2	-3	-8	-3	-2	-2	40	5	-5	42	17	63	60	11	28	20	20
PF00444	Ribosomal_L36	Ribosomal protein L36	1	2	2	37	0	2	0	4	3	33	0	0.640114	0.253333	3.12444	0.276699	0.439915	-0.222665	-0.294852	0.0721869		0	0	0	0	0	0	0	0	1	0	0	0	0	0	0	0	-1	0	-1	-1	-1	0	-1	0	0	0	0
PF00445	Ribonuclease_T2	Ribonuclease T2 family	4	4	41	48	4	5	2	4	33	40	1.35338	1.34569	2.95556	3.71556	0.399354	0.480456	0.277841	0.311388	-0.0335475		0	0	-1	2	-1	0	0	0	-1	0	1	0	0	0	-1	1	4	0	0	0	-2	3	0	-3	-1	-1	2
PF00447	HSF_DNA-bind	HSF-type DNA-binding	8	8	136	19	9	7	14	2	117	18	0.81358	4.14474	11.0622	1.68889	0.417423	17.8165	-0.285481	4.61392	-4.8994		4	-5	-3	2	17	3	0	2	0	0	-3	-2	4	-7	3	-9	-11	-18	34	0	0	0	3	0	0	63	72
PF00448	SRP54	SRP54-type protein, GTPase domain	2	4	49	62	1	7	6	3	43	50	0.241676	1.56405	4.13778	4.47556	2.59413	1.53869	-0.969562	0.66794	-1.6375		0	0	-1	1	0	0	0	0	0	0	-2	1	-1	0	0	0	-1	0	0	1	0	0	4	-1	0	0	1
PF00449	Urease_alpha	Urease alpha-subunit, N-terminal domain	3	3	17	41	0	3	2	5	18	32	0	0.960171	1.68889	3.12444	1.84466	0.0053765	-0.758439	-0.0261576	-0.732282		1	0	0	0	0	0	-1	0	0	1	0	0	-1	0	0	0	1	-1	0	0	-1	0	0	-1	0	0	0
PF00450	Peptidase_S10	Serine carboxypeptidase	7	7	167	24	12	3	15	3	138	24	0.928793	1.31579	12.92	2.28	0.0710763	0.24607	-0.102496	0.207709	-0.310205		3	0	4	6	5	-2	0	0	1	-1	3	0	-6	-3	-1	-2	3	0	-1	15	9	19	28	9	8	7	6
PF00453	Ribosomal_L20	Ribosomal protein L20	2	1	16	46	1	2	0	1	16	43	0.740132	0.538278	1.35111	3.71556	0.0991205	0.861714	-0.12327	-0.451906	0.328636		0	-1	0	0	0	0	0	0	1	0	0	0	0	0	0	0	0	1	0	0	0	0	1	0	0	0	0
PF00454	PI3_PI4_kinase	Phosphatidylinositol 3- and 4-kinase	5	10	235	0	15	4	21	0	194	6	0.826193	7.89474	18.1556	0.506667	0.59546	25.3711	-0.356236	6.32518	-6.68142		1	-3	-3	7	1	4	0	-1	1	0	-2	0	-2	-1	-1	-1	-1	-1	0	9	7	19	19	3	13	10	10
PF00455	DeoRC	DeoR C terminal sensor domain	0	0	0	0	0	0	0	0	0	0	0	0	0	0	0	0	FALSE	FALSE	FALSE		0	0	0	0	0	0	0	0	0	0	0	0	0	0	0	0	0	0	0	0	0	0	0	0	0	0	0
PF00456	Transketolase_N	Transketolase, thiamine diphosphate binding domain	6	0	60	53	4	5	4	2	57	42	0.776531	1.34569	5.15111	3.71556	0.279377	0.480456	-0.223946	0.311388	-0.535334		0	0	0	0	0	1	0	0	1	0	1	0	1	0	0	1	5	0	0	0	-8	4	10	-10	-1	0	1
PF00458	WHEP-TRS	WHEP-TRS domain	7	5	57	65	9	6	9	3	41	59	2.13158	1.14601	4.22222	5.23556	5.82316	0.120927	1.80089	0.13785	1.66304		-2	0	1	1	0	-2	0	2	0	1	1	-1	-1	2	0	0	-1	1	0	0	-1	0	1	0	0	0	0
PF00459	Inositol_P	Inositol monophosphatase family	8	6	166	30	13	5	17	2	137	27	0.999658	2.04174	13.0044	2.44889	1.64722e-06	2.86387	-0.000444962	1.04292	-1.04337		-1	-1	-1	2	1	1	0	1	0	0	-2	0	-2	2	-3	1	1	2	0	2	4	11	11	1	4	7	7
PF00460	Flg_bb_rod	Flagella basal body rod protein	0	0	0	0	0	0	0	0	0	0	0	0	0	0	0	0	FALSE	FALSE	FALSE		0	0	0	0	0	0	0	0	0	0	0	0	0	0	0	0	0	0	0	0	0	0	0	0	0	0	0
PF00462	Glutaredoxin	Glutaredoxin	9	7	169	29	12	4	16	3	142	27	0.8994	1.57895	13.3422	2.53333	0.146527	0.917484	-0.153739	0.470908	-0.624647		-3	-6	-6	11	2	7	1	1	0	0	-1	-3	-2	3	-4	1	8	1	0	16	16	28	39	7	18	13	16
PF00463	ICL	Isocitrate lyase family	3	2	52	70	4	4	6	4	43	62	0.966702	0.717703	4.13778	5.57333	0.00497615	0.482568	-0.0251373	-0.312238	0.287101		0	0	0	1	0	0	0	0	0	0	0	-1	0	0	-1	0	4	1	0	3	-13	26	0	-13	0	-1	0
PF00464	SHMT	Serine hydroxymethyltransferase	6	3	51	52	5	2	5	2	43	47	1.23355	0.483351	4.05333	4.13778	0.239406	1.202	0.204373	-0.563962	0.768335		0	-1	-1	0	0	0	0	0	1	0	1	0	1	1	0	0	2	1	-1	0	-5	5	13	-3	0	0	0
PF00465	Fe-ADH	Iron-containing alcohol dehydrogenase	4	5	54	63	2	11	3	5	51	49	0.438596	2.41228	4.56	4.56	1.5646	9.78128	-0.675731	2.75375	-3.42949		0	-1	-1	3	-1	1	0	0	0	0	1	0	-1	-1	0	0	2	0	0	0	-5	22	5	-1	0	0	1
PF00466	Ribosomal_L10	Ribosomal protein L10	4	3	54	61	9	1	2	4	47	53	2.17508	0.207756	4.13778	4.81333	6.15242	3.29449	1.88196	-1.15794	3.0399		0	-1	0	1	0	0	0	0	-1	1	1	0	1	0	0	0	-1	0	0	0	1	0	13	-2	0	0	0
PF00467	KOW	KOW motif	5	4	64	62	6	6	3	5	56	53	1.20428	1.22505	4.98222	4.89778	0.225173	0.268606	0.19714	0.21877	-0.0216301		0	-2	0	0	-1	0	0	1	0	1	0	1	1	0	0	0	-1	1	-3	4	4	-2	15	-5	0	-1	0
PF00468	Ribosomal_L34	Ribosomal protein L34	2	5	12	57	4	6	3	1	7	53	4.73684	1.31579	0.844444	4.56	12.5487	0.492139	3.40178	0.316076	3.08571		-1	-1	-1	0	0	0	0	0	0	0	-1	0	1	0	0	0	-1	1	0	0	0	0	2	0	0	0	-1
PF00469	F-protein	Negative factor, (F-Protein) or Nef	0	0	0	0	0	0	0	0	0	0	0	0	0	0	0	0	FALSE	FALSE	FALSE		0	0	0	0	0	0	0	0	0	0	0	0	0	0	0	0	0	0	0	0	0	0	0	0	0	0	0
PF00471	Ribosomal_L33	Ribosomal protein L33	2	1	20	43	3	1	0	3	18	37	1.97368	0.296053	1.52	3.37778	1.5535	1.82411	0.672396	-0.752457	1.42485		0	-1	0	1	0	0	0	0	0	0	0	0	0	0	0	1	0	0	0	0	0	1	5	0	1	0	0
PF00472	RF-1	RF-1 domain	6	5	60	65	4	4	9	4	50	57	0.802855	0.776531	4.98222	5.15111	0.210269	0.279377	-0.189394	-0.223946	0.0345522		0	-1	-1	2	1	1	1	0	-1	0	2	0	0	0	0	-1	0	1	-1	0	0	2	-1	0	0	0	0
PF00474	SSF	Sodium:solute symporter family	6	5	62	67	5	8	7	5	55	54	0.955008	1.60571	5.23556	4.98222	0.0114964	1.97474	-0.0387623	0.796028	-0.83479		0	-4	-2	4	0	4	0	0	0	0	-2	0	1	1	0	-2	5	1	-2	0	-5	8	5	-10	-1	0	1
PF00475	IGPD	Imidazoleglycerol-phosphate dehydratase	3	2	25	37	2	2	3	1	21	34	0.986842	0.676692	2.02667	2.95556	0.00038054	0.335759	-0.00681238	-0.250042	0.243229		0	-1	0	1	0	0	0	0	0	0	1	0	-1	0	1	0	0	0	0	0	0	0	0	-1	0	0	0
PF00476	DNA_pol_A	DNA polymerase family A	7	3	56	51	6	3	4	5	49	40	1.34062	0.789474	4.47556	3.8	0.561872	0.182901	0.343416	-0.174644	0.51806		-1	0	-1	1	0	1	0	0	-1	1	2	0	0	1	0	0	1	0	1	0	-2	2	3	-1	1	0	0
PF00478	IMPDH	IMP dehydrogenase / GMP reductase domain	8	5	168	21	11	3	16	0	140	22	0.83502	1.61483	13.1733	1.85778	0.389262	0.758652	-0.273527	0.415951	-0.689478		0	0	-1	1	2	1	0	-1	-1	1	3	1	0	-1	0	0	6	1	-1	26	20	36	36	9	12	4	4
PF00479	G6PD_N	Glucose-6-phosphate dehydrogenase, NAD binding domain	5	2	37	48	0	9	4	1	36	38	0	2.73279	3.37778	3.29333	3.68932	10.6169	-1.26152	2.95056	-4.21208		1	0	0	2	0	0	0	0	0	1	-1	0	-1	0	0	1	1	0	0	0	0	0	0	-2	0	0	1
PF00480	ROK	ROK family	1	2	27	41	4	2	1	4	22	34	2.0595	0.623269	1.94222	3.20889	2.3492	0.495148	0.901884	-0.317278	1.21916		-1	0	0	-2	0	0	0	0	0	0	0	0	0	1	0	0	0	0	0	0	0	0	0	0	0	0	0
PF00481	PP2C	Protein phosphatase 2C	7	11	187	37	11	8	17	4	157	34	0.748639	2.49307	14.6933	3.20889	1.00846	7.68992	-0.501313	2.25547	-2.75679		3	2	-7	3	1	11	0	-2	-1	-1	-9	-3	-6	-2	-1	-1	66	-1	1	82	48	108	128	32	71	20	18
PF00482	T2SSF	Type II secretion system (T2SS), protein F	0	0	2	20	0	3	0	4	2	12	0	2.22039	0.168889	1.35111	0.184466	2.16635	-0.175508	0.850593	-1.0261		0	0	0	0	0	0	0	0	0	0	0	0	0	0	0	0	0	0	0	0	0	0	0	0	0	0	0
PF00483	NTP_transferase	Nucleotidyl transferase	3	1	49	55	3	2	4	5	42	47	0.772311	0.455466	3.88444	4.39111	0.218717	1.41729	-0.193807	-0.631063	0.437256		0	0	-1	1	0	0	0	0	0	0	1	0	0	0	1	0	0	0	0	0	0	0	8	0	0	0	0
PF00484	Pro_CA	Carbonic anhydrase	6	4	49	54	6	2	4	3	43	50	1.51176	0.446872	3.96889	4.47556	1.12358	1.49059	0.538877	-0.653404	1.19228		-3	0	0	-1	0	1	0	-1	-1	0	1	0	5	4	1	0	6	0	0	0	-5	4	2	0	-1	0	0
PF00485	PRK	Phosphoribulokinase / Uridine kinase family	9	3	60	60	3	5	6	10	57	44	0.56391	1.09649	5.32	4.56	1.10043	0.0460123	-0.531399	0.0808417	-0.612241		-1	1	-1	0	0	3	0	0	1	0	2	1	-1	1	2	0	2	1	0	0	-6	2	4	-6	2	0	2
PF00486	Trans_reg_C	Transcriptional regulatory protein, C terminal	1	4	9	23	1	3	0	5	7	17	1.69173	1.61483	0.591111	1.85778	0.305407	0.758652	0.236188	0.415951	-0.179762		0	0	0	0	-1	-1	0	0	0	0	3	0	0	0	-1	0	-1	0	0	0	0	0	0	0	0	0	0
PF00487	FA_desaturase	Fatty acid desaturase	8	9	234	0	17	2	21	0	195	7	0.932018	3.38346	18.24	0.591111	0.0914579	3.59408	-0.117856	1.23668	-1.35454		-2	-5	-2	14	4	2	0	0	-2	1	3	-1	-5	2	-3	-2	3	-1	1	31	20	50	73	17	24	15	10
PF00488	MutS_V	MutS domain V	5	6	73	74	8	6	10	5	57	65	1.41398	1.01504	5.65778	5.91111	1.04875	0.00144941	0.514571	0.0133935	0.501177		-1	-1	-2	0	1	1	0	0	-1	1	1	-1	0	0	0	0	-2	1	0	0	-3	2	2	-2	0	0	2
PF00490	ALAD	Delta-aminolevulinic acid dehydratase	3	1	24	16	2	0	1	0	23	14	0.986842	0	2.02667	1.18222	0.00038054	1.29126	-0.00681238	-0.592073	0.585261		-1	0	1	0	0	0	0	0	0	0	1	0	0	0	0	1	0	0	0	1	0	0	3	0	0	0	0
PF00491	Arginase	Arginase family	6	2	47	56	2	3	3	5	44	48	0.503919	0.670308	3.96889	4.47556	1.06281	0.528736	-0.519168	-0.330554	-0.188614		1	-2	0	1	0	0	0	1	0	0	1	-1	0	0	1	0	4	0	0	1	-1	0	1	-2	-1	0	-1
PF00493	MCM	MCM P-loop domain	5	7	173	28	12	2	15	2	142	29	0.905129	0.764007	13.2578	2.61778	0.129484	0.158353	-0.143291	-0.160725	0.0174338		2	-3	2	5	0	-2	0	-1	0	0	-1	1	0	-1	0	-1	-1	1	0	20	10	20	40	9	9	12	9
PF00494	SQS_PSY	Squalene/phytoene synthase	3	4	54	55	3	5	5	3	46	47	0.696594	1.18421	4.30667	4.22222	0.430808	0.155188	-0.291076	0.158875	-0.449951		0	-2	-2	2	0	1	0	0	0	0	0	0	0	0	0	0	-2	-1	1	0	0	-1	3	-2	0	1	-1
PF00496	SBP_bac_5	Bacterial extracellular solute-binding proteins, family 5 Middle	4	5	33	80	0	8	2	9	33	65	0	1.28023	2.95556	6.24889	3.22816	0.531189	-1.14037	0.331514	-1.47188		0	-1	0	1	-1	0	0	0	0	0	-1	0	-1	0	0	1	4	2	-1	0	-2	0	1	-1	1	0	-1
PF00497	SBP_bac_3	Bacterial extracellular solute-binding proteins, family 3	4	5	52	68	1	7	5	7	49	57	0.219298	1.29523	4.56	5.40444	3.03056	0.509867	-1.08773	0.323127	-1.41085		0	-1	0	2	0	0	0	0	0	-1	-1	0	-1	1	0	-1	6	3	0	0	-1	2	1	-1	0	-1	2
PF00498	FHA	FHA domain	7	11	142	74	8	10	16	5	116	69	0.717703	1.60028	11.1467	6.24889	0.965137	2.43271	-0.486921	0.925083	-1.412		-4	-12	-5	31	3	12	1	-1	1	-1	-5	-3	-6	6	-1	-2	28	0	-1	10	-19	24	22	-14	10	1	4
PF00499	Oxidored_q3	NADH-ubiquinone/plastoquinone oxidoreductase chain 6	0	0	1	15	0	1	0	5	1	8	0	0.910931	0.0844444	1.09778	0.092233	0.00944995	-0.118411	-0.0350059	-0.0834056		0	0	0	0	0	0	0	0	0	0	0	0	0	0	0	0	0	0	0	0	0	0	0	0	0	0	0
PF00501	AMP-binding	AMP-binding enzyme	7	10	177	54	9	10	17	4	148	49	0.645933	2.23436	13.9333	4.47556	1.89878	7.34063	-0.774135	2.17126	-2.94539		11	-10	4	30	2	-2	-1	0	3	-2	-12	-3	-8	-6	-4	0	33	2	-2	40	8	36	95	-1	18	16	25
PF00502	Phycobilisome	Phycobilisome protein	0	0	0	0	0	0	0	0	0	0	0	0	0	0	0	0	FALSE	FALSE	FALSE		0	0	0	0	0	0	0	0	0	0	0	0	0	0	0	0	0	0	0	0	0	0	0	0	0	0	0
PF00503	G-alpha	G-protein alpha subunit	4	2	174	30	13	1	15	3	141	26	0.986842	0.408348	13.1733	2.44889	0.00247351	0.933433	-0.0175777	-0.476289	0.458712		1	0	0	2	0	0	0	0	0	0	1	0	-1	0	0	0	-1	1	0	28	16	30	63	12	25	5	7
PF00504	Chloroa_b-bind	Chlorophyll A-B binding protein	8	10	229	3	17	2	21	0	193	10	0.940728	2.36842	18.0711	0.844444	0.068875	1.70099	-0.100737	0.716339	-0.817076		0	-11	8	33	14	-8	-1	2	-3	1	-7	-6	-14	1	-14	-4	53	15	-14	129	82	169	218	94	123	48	55
PF00505	HMG_box	HMG (high mobility group) box	8	10	172	37	12	7	16	3	143	35	0.893744	2.18144	13.4267	3.20889	0.164509	4.82289	-0.164285	1.55154	-1.71582		1	-4	-2	7	6	5	0	1	-1	1	-5	-3	-2	-2	3	-3	-4	5	-5	35	18	59	74	18	16	64	90
PF00507	Oxidored_q4	NADH-ubiquinone/plastoquinone oxidoreductase, chain 3	0	3	3	14	0	2	0	5	3	9	0	1.69173	0.253333	1.18222	0.276699	0.610813	-0.222665	0.362028	-0.584694		0	0	0	0	0	0	0	0	0	-1	-1	0	0	0	0	0	-1	0	0	0	0	0	0	0	0	0	0
PF00510	COX3	Cytochrome c oxidase subunit III	0	0	3	19	0	3	0	4	3	12	0	2.22039	0.253333	1.35111	0.276699	2.16635	-0.222665	0.850593	-1.07326		0	0	0	0	0	0	0	0	0	0	0	0	0	0	0	0	0	0	0	0	0	0	0	0	0	0	0
PF00512	HisKA	His Kinase A (phospho-acceptor) domain	5	5	233	0	17	2	21	0	190	3	0.954103	7.89474	17.8178	0.253333	0.0407151	12.6855	-0.0756748	3.43357	-3.50924		0	0	-3	-2	1	6	1	0	0	0	17	-3	23	-1	0	0	-3	0	0	4	8	12	22	3	1	30	31
PF00514	Arm	Armadillo/beta-catenin-like repeat	7	8	93	115	5	12	6	10	83	97	0.665287	1.32809	7.51556	9.03556	0.915159	1.05251	-0.470122	0.5158	-0.985922		17	53	0	-35	0	4	0	-1	-1	0	18	-4	5	-9	-1	-1	1	-3	1	13	-19	8	10	-23	-2	1	-1
PF00515	TPR_1	Tetratricopeptide repeat	7	8	222	14	13	6	20	0	186	15	0.747317	4.73684	17.3956	1.26667	1.20652	18.8231	-0.565394	4.84339	-5.40878		1	1	-1	-1	0	7	-3	1	-1	0	-1	0	-1	-1	1	0	3	-1	1	158	39	183	275	-14	98	58	56
PF00517	GP41	Retroviral envelope protein	0	0	0	0	0	0	0	0	0	0	0	0	0	0	0	0	FALSE	FALSE	FALSE		0	0	0	0	0	0	0	0	0	0	0	0	0	0	0	0	0	0	0	0	0	0	0	0	0	0	0
PF00520	Ion_trans	Ion transport protein	6	11	0	0	0	4	0	0	6	7	0	6.76692	0.506667	0.591111	0.553398	20.7752	-0.340148	5.28695	-5.6271		22	89	-30	-21	0	99	-5	5	0	-3	-21	-11	-21	-10	-2	-2	527	1	-1	0	0	0	0	0	0	0	0
PF00521	DNA_topoisoIV	DNA gyrase/topoisomerase IV, subunit A	3	2	59	69	4	6	8	1	48	60	0.845865	1.1648	4.72889	5.15111	0.12196	0.151546	-0.138514	0.156728	-0.295242		0	0	0	0	0	0	0	0	0	0	2	0	-1	0	0	0	6	2	-1	1	-5	0	4	-4	0	0	1
PF00526	Dicty_CTDC	Dictyostelium (slime mold) repeat	0	0	1	21	0	1	0	1	1	19	0	0.592105	0.0844444	1.68889	0.092233	0.305569	-0.118411	-0.236264	0.117852		0	0	0	0	0	0	0	0	0	0	0	0	0	0	0	0	0	0	0	0	0	0	0	0	0	0	0
PF00527	E7	E7 protein, Early protein	0	0	0	0	0	0	0	0	0	0	0	0	0	0	0	0	FALSE	FALSE	FALSE		0	0	0	0	0	0	0	0	0	0	0	0	0	0	0	0	0	0	0	0	0	0	0	0	0	0	0
PF00528	BPD_transp_1	Binding-protein-dependent transport system inner membrane component	0	0	6	17	0	3	0	4	6	9	0	2.73279	0.506667	1.09778	0.553398	3.53897	-0.340148	1.22226	-1.56241		0	0	0	0	0	0	0	0	0	0	0	0	0	0	0	0	0	0	0	0	0	0	0	0	0	0	0
PF00529	HlyD	HlyD membrane-fusion protein of T1SS	0	0	9	51	0	3	0	6	8	39	0	0.789474	0.675556	3.8	0.737864	0.182901	-0.40855	-0.174644	-0.233906		0	0	0	0	0	0	0	0	0	0	0	0	0	0	0	0	0	0	0	0	0	0	0	0	0	0	0
PF00530	SRCR	Scavenger receptor cysteine-rich domain	3	4	35	39	4	7	3	3	31	31	1.39319	2.43808	2.87111	2.87111	0.480144	6.38478	0.311263	1.93891	-1.62765		3	0	8	-1	0	-1	0	0	0	0	-1	0	0	-1	0	0	7	0	0	2	-2	1	0	-2	0	0	0
PF00532	Peripla_BP_1	Periplasmic binding proteins and sugar binding domain of LacI family	0	0	8	27	0	3	0	5	8	19	0	1.48026	0.675556	2.02667	0.737864	0.505392	-0.40855	0.321354	-0.729904		0	0	0	0	0	0	0	0	0	0	0	0	0	0	0	0	0	0	0	0	0	0	0	0	0	-1	0
PF00533	BRCT	BRCA1 C Terminus (BRCT) domain	10	9	78	85	10	5	10	7	63	79	1.62221	0.688494	6.16444	7.26222	2.57797	0.76581	0.96513	-0.418487	1.38362		-4	-2	-1	2	2	3	-1	1	-2	1	2	-1	1	3	-1	-1	2	2	-1	1	-4	11	-1	-8	2	0	4
PF00534	Glycos_transf_1	Glycosyl transferases group 1	9	6	172	34	13	4	17	2	142	32	0.968222	1.39319	13.4267	2.87111	0.0147064	0.480144	-0.0440829	0.311263	-0.355345		-2	-2	-7	5	1	9	0	1	-2	1	1	1	-2	4	-2	0	14	0	0	38	15	34	55	9	29	9	16
PF00535	Glycos_transf_2	Glycosyl transferase family 2	8	10	174	37	10	4	17	2	147	39	0.72208	1.15533	13.8489	3.46222	1.16218	0.090494	-0.551274	0.117163	-0.668436		6	-6	-3	19	1	6	-1	1	-1	0	-5	-2	-4	-4	2	-2	13	1	-1	62	32	86	98	6	34	6	13
PF00536	SAM_1	SAM domain (Sterile alpha motif)	7	7	171	30	14	4	15	2	140	29	1.06961	1.52801	13.0889	2.61778	0.0687463	0.788832	0.100633	0.426602	-0.325969		-2	5	-4	-2	0	13	0	1	0	0	5	-5	-4	4	-1	0	7	7	-3	27	11	32	59	3	13	2	9
PF00538	Linker_histone	linker histone H1 and H5 family	4	6	45	55	6	3	9	3	33	54	1.69173	0.623269	3.54667	4.81333	1.83244	0.742722	0.754883	-0.410285	1.16517		-1	-1	0	0	2	-1	0	0	0	0	0	-1	2	1	0	0	-2	12	-3	0	0	0	4	0	0	0	0
PF00542	Ribosomal_L12	Ribosomal protein L7/L12 C-terminal domain	2	4	52	47	2	5	4	1	46	42	0.473684	1.37699	4.22222	3.63111	1.27295	0.55829	-0.586342	0.342036	-0.928378		2	0	0	1	0	0	0	0	0	-2	-1	0	0	-2	0	0	0	0	-1	0	0	0	6	-2	0	0	-1
PF00543	P-II	Nitrogen regulatory protein P-II	0	0	4	34	0	2	0	5	4	25	0	0.789474	0.337778	2.53333	0.368932	0.121934	-0.264731	-0.138498	-0.126233		0	0	0	0	0	0	0	0	0	0	0	0	0	0	0	0	0	0	0	0	0	0	0	0	0	0	0
PF00544	Pectate_lyase_4	Pectate lyase	0	0	4	7	0	3	0	1	4	3	0	8.88158	0.337778	0.337778	0.368932	22.0463	-0.264731	5.57488	-5.83961		0	0	0	0	0	0	0	0	0	0	0	0	0	0	0	0	0	0	0	0	0	0	0	0	0	0	0
PF00545	Ribonuclease	ribonuclease	0	0	0	11	0	0	0	1	0	10	0	0	0	0.928889	0	1.01456	FALSE	-0.50333	FALSE		0	0	0	0	0	0	0	0	0	0	0	0	0	0	0	0	0	0	0	0	0	0	0	0	0	0	0
PF00547	Urease_gamma	Urease, gamma subunit	2	4	16	49	0	6	2	5	16	38	0	1.65239	1.52	3.63111	1.66019	1.66912	-0.704263	0.706911	-1.41117		1	0	-1	0	0	0	-1	0	0	1	0	0	-1	0	0	0	0	-1	0	0	-1	0	0	0	0	0	0
PF00548	Peptidase_C3	3C cysteine protease (picornain 3C)	0	0	0	0	0	0	0	0	0	0	0	0	0	0	0	0	FALSE	FALSE	FALSE		0	0	0	0	0	0	0	0	0	0	0	0	0	0	0	0	0	0	0	0	0	0	0	0	0	0	0
PF00549	Ligase_CoA	CoA-ligase	4	3	52	50	0	6	5	3	49	40	0	1.65239	4.56	3.63111	4.98058	1.66912	-1.59119	0.706911	-2.29811		1	-1	-1	1	0	0	0	0	1	0	0	0	0	0	0	0	2	-1	0	1	-8	6	4	-4	1	0	0
PF00550	PP-binding	Phosphopantetheine attachment site	3	7	171	52	8	8	14	5	142	45	0.607287	1.89474	13.1733	4.22222	2.20908	3.6455	-0.862644	1.2501	-2.11275		3	-2	0	12	0	-1	0	0	0	-1	-5	-1	-5	-2	0	0	39	0	0	217	125	201	266	77	80	6	11
PF00551	Formyl_trans_N	Formyl transferase	1	3	52	65	3	5	5	2	44	58	0.725027	0.986842	4.13778	5.06667	0.339906	0.000951349	-0.251902	-0.0108199	-0.241082		0	0	0	2	0	0	0	0	0	0	0	0	0	0	0	-1	-1	0	-1	0	-4	2	2	-4	0	0	1
PF00553	CBM_2	Cellulose binding domain	0	0	2	10	0	1	0	1	2	8	0	1.31579	0.168889	0.76	0.184466	0.0820232	-0.175508	0.110937	-0.286445		0	0	0	0	0	0	0	0	0	0	0	0	0	0	0	0	0	0	0	0	0	0	0	0	0	0	0
PF00557	Peptidase_M24	Metallopeptidase family M24	7	8	173	30	10	4	16	1	145	31	0.735534	1.48026	13.5956	2.70222	1.03303	0.673856	-0.509413	0.385408	-0.894821		2	-1	-1	2	1	1	0	0	-1	1	0	1	-1	-1	-2	-1	10	-1	0	11	5	20	32	4	11	6	6
PF00560	LRR_1	Leucine Rich Repeat	7	9	0	0	1	3	1	0	5	6	1.97368	5.92105	0.506667	0.506667	0.517832	13.0018	0.326272	3.50697	-3.18069		2	-6	-8	6	1	28	-3	5	-1	0	6	-6	-1	-2	-8	6	0	-1	0	0	0	0	0	0	0	0	0
PF00561	Abhydrolase_1	alpha/beta hydrolase fold	8	11	83	142	4	15	10	11	71	122	0.584795	1.33558	6.84	11.2311	1.28237	1.36861	-0.589294	0.616092	-1.20539		-4	-18	-4	29	6	7	-1	1	-2	2	-4	-4	-3	5	-1	-6	14	1	-2	4	-21	48	36	-46	1	0	3
PF00562	RNA_pol_Rpb2_6	RNA polymerase Rpb2, domain 6	4	7	62	59	2	7	6	5	55	50	0.388266	1.50718	5.15111	4.64444	2.09929	1.29142	-0.831598	0.592124	-1.42372		1	-2	-1	2	0	0	-1	0	0	-1	0	0	1	-1	-1	0	1	0	-1	1	-2	-1	5	0	1	2	0
PF00563	EAL	EAL domain	1	4	0	0	1	0	0	1	0	3	0	0	0	0.337778	0	0.368932	0	-0.264731	0.264731		0	0	0	0	-1	-1	0	0	0	0	1	0	0	0	-1	0	-1	0	0	0	0	0	0	0	0	0	0
PF00564	PB1	PB1 domain	5	4	46	60	5	5	2	5	41	50	1.37699	1.07656	3.63111	4.64444	0.55829	0.0295033	0.342036	0.0636763	0.27836		0	-1	-1	0	0	3	2	0	0	0	1	-2	3	-1	0	0	1	0	0	0	0	4	4	0	0	3	0
PF00565	SNase	Staphylococcal nuclease homologue	5	6	56	52	5	6	8	1	48	47	1.05733	1.48026	4.72889	4.05333	0.0168492	1.01078	0.0473426	0.502082	-0.45474		0	-2	-1	2	1	0	0	0	0	0	-1	1	1	0	0	-1	-1	1	-1	1	-1	0	3	-1	0	1	-1
PF00566	RabGAP-TBC	Rab-GTPase-TBC domain	8	9	234	0	16	3	20	1	196	5	0.877193	5.92105	18.24	0.506667	0.298561	13.0018	-0.233003	3.50697	-3.73997		-5	1	-3	0	-1	8	-1	1	-1	1	-2	-1	-1	5	2	0	19	1	-1	26	17	48	52	4	43	7	7
PF00567	TUDOR	Tudor domain	4	3	34	30	1	6	4	0	32	24	0.328947	2.96053	3.04	2.02667	1.49149	8.3542	-0.653676	2.41477	-3.06844		0	0	-1	1	0	1	0	0	0	0	-1	1	0	1	0	0	-1	0	0	0	-1	0	4	0	0	0	0
PF00568	WH1	WH1 domain	0	0	2	17	0	0	0	4	2	13	0	0	0.168889	1.43556	0.184466	1.56796	-0.175508	-0.676741	0.501233		0	0	0	0	0	0	0	0	0	0	0	0	0	0	0	0	0	0	0	0	0	0	0	0	0	0	0
PF00569	ZZ	Zinc finger, ZZ type	6	6	69	86	5	9	8	7	58	72	0.897129	1.3491	5.57333	6.67111	0.0640034	0.879705	-0.0967598	0.458068	-0.554828		-2	0	-1	-1	2	1	1	0	0	-1	-1	0	2	2	0	0	4	0	-1	0	-2	2	8	-5	2	1	-1
PF00570	HRDC	HRDC domain	5	8	54	63	7	6	8	1	39	60	1.76372	1.1648	3.96889	5.15111	2.49855	0.151546	0.943282	0.156728	0.786554		-1	-1	-1	14	0	2	0	0	0	0	1	-1	-3	1	-1	0	-1	1	-1	0	-2	0	0	-1	0	0	0
PF00571	CBS	CBS domain	8	7	235	0	16	3	20	0	197	4	0.873151	8.88158	18.3244	0.337778	0.320023	22.0463	-0.242912	5.57488	-5.81779		-2	-4	-4	8	0	2	1	2	0	0	-5	-2	-2	2	-1	1	6	1	0	55	21	45	60	15	21	18	21
PF00572	Ribosomal_L13	Ribosomal protein L13	6	3	44	55	4	5	2	7	43	42	1.05263	1.20838	3.8	4.13778	0.0114113	0.194578	0.0386126	0.181027	-0.142414		0	-2	-1	1	0	1	0	0	1	0	-1	0	0	0	0	2	1	1	0	3	0	-1	12	-3	-1	0	0
PF00573	Ribosomal_L4	Ribosomal protein L4/L1 family	3	1	51	57	3	2	2	3	48	48	0.710526	0.464396	4.22222	4.30667	0.384426	1.34473	-0.271448	-0.608709	0.337261		0	-1	0	1	0	0	0	0	1	0	0	0	0	0	0	0	0	1	0	1	-1	0	13	-4	0	0	0
PF00574	CLP_protease	Clp protease	5	6	61	68	5	6	4	4	56	58	0.986842	1.14601	5.06667	5.23556	0.000951349	0.120927	-0.0108199	0.13785	-0.14867		1	-2	-1	4	0	0	0	0	-1	0	2	0	-1	0	-1	1	-1	1	0	0	-2	4	10	-3	0	0	-1
PF00575	S1	S1 RNA binding domain	5	6	172	31	11	4	16	3	141	28	0.829702	1.52801	13.2578	2.61778	0.417438	0.788832	-0.285487	0.426602	-0.712089		1	-2	-1	4	-1	0	0	0	0	0	-3	0	-2	0	0	1	11	1	-1	54	33	67	84	22	18	10	10
PF00576	Transthyretin	HIUase/Transthyretin family	1	2	23	47	1	3	0	4	20	38	0.592105	0.845865	1.68889	3.54667	0.305569	0.0914698	-0.236264	-0.117864	-0.118399		0	0	0	0	0	0	-1	0	0	0	0	-1	0	0	0	1	0	0	0	0	0	0	0	0	0	-1	0
PF00578	AhpC-TSA	AhpC/TSA family	7	7	173	27	13	3	16	1	143	28	0.968222	1.22505	13.4267	2.44889	0.0147064	0.134303	-0.0440829	0.146295	-0.190378		-2	-5	-4	7	8	9	-2	0	0	1	5	0	-1	2	0	-4	0	-4	2	38	27	36	57	14	21	9	13
PF00579	tRNA-synt_1b	tRNA synthetases class I (W and Y)	8	4	56	48	3	5	7	1	51	42	0.612523	1.37699	4.89778	3.63111	0.799542	0.55829	-0.430357	0.342036	-0.772393		1	-1	-1	1	1	1	0	0	1	0	2	1	0	0	0	0	-2	-1	1	0	-1	0	7	-1	0	1	0
PF00580	UvrD-helicase	UvrD/REP helicase N-terminal domain	8	7	63	80	6	4	5	5	57	74	1.14601	0.5996	5.23556	6.67111	0.120927	1.16299	0.13785	-0.55153	0.689381		-1	-1	-2	5	0	4	1	0	-2	1	0	0	-1	2	-2	2	2	4	-2	0	-1	0	4	0	0	0	0
PF00581	Rhodanese	Rhodanese-like domain	8	9	175	38	11	4	15	3	149	38	0.794288	1.15533	13.8489	3.46222	0.636416	0.090494	-0.371599	0.117163	-0.488762		-1	-3	-9	3	1	8	5	0	-1	1	-3	-4	-1	0	3	-1	4	-2	1	20	13	40	38	3	21	12	13
PF00582	Usp	Universal stress protein family	3	4	38	56	3	8	2	8	33	41	1.01504	1.9334	2.95556	4.13778	0.000724703	3.8872	0.00942883	1.31287	-1.30344		-1	0	-1	-1	0	0	2	0	0	0	0	0	-1	1	0	0	3	0	0	0	2	0	3	-1	0	0	0
PF00583	Acetyltransf_1	Acetyltransferase (GNAT) family	7	10	75	147	3	14	10	11	64	129	0.480085	1.18421	6.24889	11.8222	1.83833	0.434527	-0.756599	0.292621	-1.04922		-5	-17	-6	32	7	8	0	3	-2	2	-3	-5	-6	4	-1	-3	30	0	-2	3	-10	9	30	-21	1	1	-3
PF00584	SecE	SecE/Sec61-gamma subunits of protein translocation complex	1	5	38	56	3	9	1	4	34	45	1.01504	2.17508	2.95556	4.13778	0.000724703	6.15242	0.00942883	1.88196	-1.87253		-1	0	-1	0	0	0	0	0	0	0	0	0	-1	1	0	0	-1	-1	0	1	-2	3	2	-2	0	0	0
PF00585	Thr_dehydrat_C	C-terminal regulatory domain of Threonine dehydratase	2	2	24	32	2	4	3	1	20	27	1.02975	1.69173	1.94222	2.36444	0.00186357	1.22163	0.0152177	0.57018	-0.554963		1	0	-1	0	0	0	0	0	0	0	1	0	0	0	0	0	0	-1	0	1	-1	-1	0	-1	0	0	0
PF00586	AIRS	AIR synthase related protein, N-terminal domain	2	0	47	61	1	7	7	2	39	50	0.257437	1.59413	3.88444	4.39111	2.33485	1.67466	-0.897885	0.708551	-1.60644		0	0	0	2	0	0	0	0	0	0	0	0	0	0	0	0	1	0	0	0	-2	0	3	-2	2	0	0
PF00587	tRNA-synt_2b	tRNA synthetase class II core domain (G, H, P, S and T)	3	7	175	27	11	2	16	2	142	28	0.82445	0.789474	13.3422	2.53333	0.44642	0.121934	-0.297535	-0.138498	-0.159038		0	-1	0	3	1	0	0	0	2	-1	-2	0	-1	0	-2	0	-3	-1	0	14	8	12	26	7	12	9	10
PF00588	SpoU_methylase	SpoU rRNA Methylase family	6	10	168	30	11	4	16	3	140	31	0.83502	1.39319	13.1733	2.87111	0.389262	0.480144	-0.273527	0.311263	-0.58479		-3	-3	-3	7	2	2	0	0	-1	0	-2	-1	-3	3	-3	-1	12	1	-1	12	8	25	25	0	7	6	6
PF00589	Phage_integrase	Phage integrase family	5	4	22	62	2	7	3	7	21	46	0.986842	1.56405	2.02667	4.47556	0.00038054	1.53869	-0.00681238	0.66794	-0.674753		1	1	0	-1	-2	0	0	0	0	0	0	1	-1	0	-1	23	9	0	0	0	0	0	0	0	0	0	0
PF00590	TP_methylase	Tetrapyrrole (Corrin/Porphyrin) Methylases	3	2	60	60	3	3	5	1	53	55	0.612523	0.634398	4.89778	4.72889	0.799542	0.687161	-0.430357	-0.390265	-0.0400916		2	-1	0	1	0	0	0	0	0	0	0	0	0	-1	0	0	4	0	0	0	-1	4	6	-3	-1	0	0
PF00591	Glycos_transf_3	Glycosyl transferase family, a/b domain	2	0	33	30	1	1	5	2	29	25	0.348297	0.438596	2.87111	2.28	1.32838	0.782298	-0.603637	-0.424305	-0.179332		0	0	0	0	1	0	0	0	0	0	0	0	0	0	1	0	0	0	0	1	0	0	2	-1	0	0	1
PF00593	TonB_dep_Rec	TonB dependent receptor	1	4	0	0	0	0	0	1	1	3	0	0	0.0844444	0.337778	0.092233	0.368932	-0.118411	-0.264731	0.146319		0	0	0	0	-1	-1	0	0	0	0	0	0	0	0	-1	1	-1	0	0	0	0	0	0	0	0	0	0
PF00594	Gla	Vitamin K-dependent carboxylation/gamma-carboxyglutamic (GLA) domain	0	0	0	0	0	0	0	0	0	0	0	0	0	0	0	0	FALSE	FALSE	FALSE		0	0	0	0	0	0	0	0	0	0	0	0	0	0	0	0	0	0	0	0	0	0	0	0	0	0	0
PF00595	PDZ	PDZ domain	8	7	99	114	4	12	10	9	88	95	0.483351	1.3664	8.27556	8.78222	2.404	1.27555	-0.917125	0.587158	-1.50428		-3	5	-14	1	1	66	0	-1	0	0	0	-1	-13	1	-2	1	4	2	-1	0	-13	13	2	-9	-1	-3	5
PF00596	Aldolase_II	Class II Aldolase and Adducin N-terminal domain	5	4	43	59	2	5	3	4	38	51	0.577664	1.07656	3.46222	4.64444	0.671627	0.0295033	-0.384592	0.0636763	-0.448268		1	-1	2	5	0	0	0	0	-1	0	0	0	0	-1	-1	2	0	0	1	0	0	0	2	0	-1	-1	0
PF00597	0	0	0	0	0	0	0	0	0	0	0	0	0	0	0	0	0	0	FALSE	FALSE	FALSE		0	0	0	0	0	0	0	0	0	0	0	0	0	0	0	0	0	0	0	0	0	0	0	0	0	0	0
PF00607	Gag_p24	gag gene protein p24 (core nucleocapsid protein)	0	0	0	0	0	0	0	0	0	0	0	0	0	0	0	0	FALSE	FALSE	FALSE		0	0	0	0	0	0	0	0	0	0	0	0	0	0	0	0	0	0	0	0	0	0	0	0	0	0	0
PF00608	Adeno_shaft	Adenoviral fibre protein (repeat/shaft region)	0	0	0	0	0	0	0	0	0	0	0	0	0	0	0	0	FALSE	FALSE	FALSE		0	0	0	0	0	0	0	0	0	0	0	0	0	0	0	0	0	0	0	0	0	0	0	0	0	0	0
PF00609	DAGK_acc	Diacylglycerol kinase accessory domain	3	2	43	52	2	6	3	4	40	41	0.550796	1.57895	3.63111	3.8	0.797014	1.37623	-0.429472	0.618443	-1.04791		0	0	0	0	0	0	0	0	1	0	0	-1	-2	0	0	0	3	0	1	3	-1	0	0	-4	0	0	0
PF00610	DEP	Domain found in Dishevelled, Egl-10, and Pleckstrin (DEP)	4	5	47	43	5	2	6	4	38	37	1.34569	0.577664	3.71556	3.46222	0.480456	0.671627	0.311388	-0.384592	0.69598		-1	0	-1	0	0	1	0	0	-1	0	0	0	0	2	0	1	-1	3	-1	1	0	0	2	-1	1	0	1
PF00611	FCH	Fes/CIP4, and EFC/F-BAR homology domain	0	3	8	27	0	2	1	1	6	25	0	0.910931	0.591111	2.19556	0.645631	0.0188999	-0.375018	-0.050291	-0.324727		0	0	0	0	0	-1	0	0	0	0	-1	0	0	0	0	0	-1	0	0	0	-2	0	0	-1	0	0	0
PF00612	IQ	IQ calmodulin-binding motif	8	10	226	0	17	2	20	0	187	8	0.97254	2.96053	17.48	0.675556	0.0142964	2.78473	-0.0434351	1.02152	-1.06495		-3	10	-5	-4	3	9	-1	3	-1	0	7	-7	-2	3	-4	-2	11	8	-4	13	3	21	34	6	19	14	12
PF00613	PI3Ka	Phosphoinositide 3-kinase family, accessory domain (PIK domain)	6	4	44	58	3	4	3	8	39	47	0.845865	0.861244	3.54667	4.64444	0.0914698	0.0970611	-0.117864	-0.121831	0.00396696		-1	1	0	-1	-1	1	0	0	0	1	1	0	0	2	-1	0	1	0	0	0	-1	-1	1	-1	2	-1	0
PF00614	PLDc	Phospholipase D Active site motif	1	3	31	42	1	5	4	4	25	34	0.408348	1.55817	2.44889	3.20889	0.933433	1.08037	-0.476289	0.524889	-1.00118		1	-1	0	0	0	0	0	0	0	0	0	0	0	-1	0	0	-1	0	0	-1	-2	0	3	0	0	0	0
PF00615	RGS	Regulator of G protein signaling domain	4	2	32	51	4	4	5	3	24	44	1.63339	1.00784	2.44889	3.96889	1.06122	0.000264452	0.518646	0.00567168	0.512974		0	2	0	0	0	0	0	0	-1	0	5	0	0	1	0	0	-3	1	0	0	0	0	0	0	0	0	0
PF00616	RasGAP	GTPase-activator protein for Ras-like GTPase	0	0	8	23	0	0	2	2	5	20	0	0	0.591111	1.85778	0.645631	2.02913	-0.375018	-0.811608	0.43659		0	0	0	0	0	0	0	0	0	0	0	0	0	0	0	0	0	0	0	0	-1	0	-1	0	0	0	0
PF00617	RasGEF	RasGEF domain	0	3	0	0	0	1	0	0	0	2	0	5.92105	0	0.168889	0	4.33393	FALSE	1.42759	FALSE		0	-1	0	0	0	0	0	0	0	0	0	0	-1	0	0	0	-1	0	0	0	0	0	0	0	0	0	0
PF00618	RasGEF_N	RasGEF N-terminal motif	0	0	5	5	0	0	0	1	4	4	0	0	0.337778	0.422222	0.368932	0.461165	-0.264731	-0.303574	0.0388428		0	0	0	0	0	0	0	0	0	0	0	0	0	0	0	0	0	0	0	0	0	0	0	0	0	0	0
PF00620	RhoGAP	RhoGAP domain	5	5	33	49	6	3	1	4	29	44	2.36842	0.740132	2.53333	4.05333	5.10296	0.297362	1.62187	-0.232442	1.85432		-2	0	-1	0	0	2	1	0	1	0	2	-1	0	3	0	0	-2	-1	0	0	-1	0	0	0	0	0	0
PF00621	RhoGEF	RhoGEF domain	3	3	35	57	4	5	1	5	30	47	1.52801	1.13866	2.61778	4.39111	0.788832	0.0914782	0.426602	0.11787	0.308731		-1	2	1	0	0	0	0	0	0	0	0	0	-1	2	0	0	-1	0	0	0	1	0	-1	0	-1	-1	0
PF00622	SPRY	SPRY domain	7	7	171	33	13	3	16	5	141	30	0.980556	1.01504	13.2578	2.95556	0.00543605	0.000724703	-0.0263063	0.00942883	-0.0357351		-2	0	0	3	-2	5	-1	0	-2	2	2	-1	-5	3	0	0	6	1	-1	15	14	27	41	5	18	4	4
PF00623	RNA_pol_Rpb1_2	RNA polymerase Rpb1, domain 2	5	5	56	69	4	7	7	3	49	61	0.845865	1.29523	4.72889	5.40444	0.12196	0.509867	-0.138514	0.323127	-0.461641		0	-1	-1	1	0	0	0	0	1	-1	-1	0	0	0	-1	1	1	1	0	0	-2	1	1	-1	1	0	0
PF00625	Guanylate_kin	Guanylate kinase	6	3	57	63	3	6	5	5	52	50	0.623269	1.29187	4.81333	4.64444	0.742722	0.428247	-0.410285	0.290009	-0.700294		-1	0	0	2	0	1	0	0	1	0	1	-2	-1	0	0	0	1	1	0	3	-3	0	0	-3	0	-1	0
PF00626	Gelsolin	Gelsolin repeat	6	6	65	60	7	6	2	2	59	54	1.35893	1.2688	5.15111	4.72889	0.718013	0.369883	0.401432	0.265146	0.136286		1	0	1	3	0	-1	0	1	-1	1	0	-1	-2	0	1	-1	-1	0	0	0	-4	1	5	-7	0	0	2
PF00627	UBA	UBA/TS-N domain	8	8	235	0	17	2	21	0	195	6	0.932018	3.94737	18.24	0.506667	0.0914579	4.69901	-0.117856	1.52028	-1.63814		-3	0	-3	4	1	3	2	-1	0	0	1	-2	-7	3	-1	-1	10	3	-2	40	19	60	60	10	35	9	8
PF00628	PHD	PHD-finger	8	9	177	38	14	3	17	4	145	38	1.02339	0.845865	13.68	3.54667	0.00811623	0.0914698	0.0323511	-0.117864	0.150216		-3	-8	-4	19	2	3	1	1	-1	0	3	-1	-4	3	-3	0	-6	-1	1	3	4	10	15	0	4	16	17
PF00629	MAM	MAM domain, meprin/A5/mu	2	3	28	32	1	5	1	3	28	27	0.408348	1.97368	2.44889	2.53333	0.933433	2.58916	-0.476289	0.968198	-1.44449		0	-4	0	22	0	0	0	0	0	0	-1	0	-1	0	0	0	4	0	0	14	0	17	-7	-19	0	0	0
PF00630	Filamin	Filamin/ABP280 repeat	6	5	58	81	6	6	5	6	50	67	1.29187	0.973324	4.64444	6.16444	0.428247	0.00475804	0.290009	-0.0245651	0.314574		0	39	-1	-14	0	4	0	1	-1	0	1	-5	-3	0	0	0	1	1	0	0	-2	0	4	-1	0	0	0
PF00631	G-gamma	GGL domain	0	0	4	45	0	3	0	3	4	37	0	0.888158	0.337778	3.37778	0.368932	0.0458534	-0.264731	-0.0806904	-0.184041		0	0	0	0	0	0	0	0	0	0	0	0	0	0	0	0	0	0	0	-1	-1	-1	2	0	0	0	0
PF00632	HECT	HECT-domain (ubiquitin-transferase)	8	9	234	0	16	3	21	0	195	6	0.877193	5.92105	18.24	0.506667	0.298561	13.0018	-0.233003	3.50697	-3.73997		3	-2	-3	12	1	6	0	0	1	-1	3	-2	-7	-1	-1	-1	15	3	-3	30	20	34	65	11	28	11	9
PF00633	HHH	Helix-hairpin-helix motif	5	5	53	56	4	5	8	4	41	49	0.966702	1.11718	4.13778	4.47556	0.00497615	0.0665929	-0.0251373	0.0988885	-0.124026		0	0	-1	2	0	1	0	0	-1	1	1	0	-1	-1	-1	0	0	1	0	1	0	2	-1	-1	0	0	0
PF00634	BRCA2	BRCA2 repeat	0	0	9	46	0	7	2	7	7	31	0	2.18144	0.76	3.20889	0.830097	4.82289	-0.440998	1.55154	-1.99253		0	0	0	0	0	0	0	0	0	0	0	0	0	0	0	0	0	0	0	0	0	0	0	0	0	0	0
PF00635	Motile_Sperm	MSP (Major sperm protein) domain	5	4	60	58	5	4	7	4	50	47	1.03878	0.928793	4.81333	4.30667	0.00784846	0.0236921	0.0317943	-0.0566683	0.0884626		0	-1	0	3	1	0	0	0	-1	1	0	-1	-1	0	0	0	1	0	2	0	-4	1	4	-3	2	0	1
PF00636	Ribonuclease_3	Ribonuclease III domain	1	6	40	64	4	7	5	4	29	55	1.39319	1.405	2.87111	4.98222	0.480144	0.883916	0.311263	0.459506	-0.148244		0	-1	0	0	0	-1	0	-1	0	0	1	0	0	-1	0	0	-1	0	-2	0	-1	2	2	-1	0	0	2
PF00637	Clathrin	Region in Clathrin and VPS	6	1	169	25	12	1	17	4	137	20	0.922761	0.493421	13.0044	2.02667	0.0841762	0.565969	-0.112543	-0.344991	0.232448		0	0	0	0	1	2	-1	0	0	0	0	0	2	1	0	0	2	0	1	7	9	31	37	3	9	2	1
PF00638	Ran_BP1	RanBP1 domain	5	4	47	57	5	5	3	1	42	51	1.31579	1.13866	3.8	4.39111	0.410116	0.0914782	0.282404	0.11787	0.164533		0	0	-1	1	0	1	0	0	-1	1	-1	0	0	1	0	0	2	-1	0	0	-3	2	1	-1	1	-1	1
PF00639	Rotamase	PPIC-type PPIASE domain	5	7	166	26	11	3	15	0	137	28	0.856994	1.2688	12.8356	2.36444	0.284932	0.184941	-0.226589	0.17577	-0.402358		-1	-1	0	6	3	1	0	0	-1	0	-3	0	-2	1	-2	0	11	-1	0	26	20	36	41	9	14	5	7
PF00641	zf-RanBP	Zn-finger in Ran binding protein and others	6	7	166	27	15	3	14	3	134	27	1.20021	1.18421	12.4978	2.53333	0.54258	0.093113	0.335955	0.11904	0.216915		-1	-2	2	11	0	-2	0	1	0	0	-2	-4	-3	1	0	-1	13	1	0	28	14	41	51	6	18	3	3
PF00642	zf-CCCH	Zinc finger C-x8-C-x5-C-x3-H type (and similar)	6	9	116	96	7	11	10	9	98	82	0.767544	1.43146	9.12	7.68444	0.535255	1.5471	-0.333102	0.67047	-1.00357		-5	-7	-1	12	4	0	0	2	0	0	-12	-5	-2	4	-2	-2	121	3	-2	33	-2	41	81	8	37	1	2
PF00643	zf-B_box	B-box zinc finger	2	4	33	42	1	6	2	3	28	34	0.394737	1.92034	2.53333	3.12444	1.01066	2.85386	-0.502042	1.04022	-1.54226		0	0	1	0	0	0	0	0	0	-1	-1	0	-1	-1	0	0	9	0	0	0	-2	3	2	-3	-1	0	0
PF00644	PARP	Poly(ADP-ribose) polymerase catalytic domain	6	5	86	71	3	11	7	7	77	54	0.422932	2.13546	7.09333	5.15111	2.57182	7.15293	-0.96344	2.12586	-3.0893		0	4	-2	6	1	8	0	0	0	0	-5	0	-11	0	-1	0	58	1	-1	44	23	69	90	4	38	-3	5
PF00645	zf-PARP	Poly(ADP-ribose) polymerase and DNA-Ligase Zn-finger region	5	4	59	64	6	5	10	3	43	57	1.34062	0.986842	4.47556	5.06667	0.561872	0.000951349	0.343416	-0.0108199	0.354236		-4	0	0	1	1	0	0	1	0	0	-1	-2	0	9	-1	0	5	0	0	0	-2	1	2	-3	0	0	2
PF00646	F-box	F-box domain	8	8	44	73	4	5	5	9	42	64	1.00784	0.811103	3.96889	6.16444	0.000264452	0.238835	0.00567168	-0.204086	0.209758		1	-14	-2	16	2	0	0	6	1	-1	1	-6	2	-1	-1	0	-4	2	-1	0	-1	0	-1	0	0	0	1
PF00647	EF1G	Elongation factor 1 gamma, conserved domain	0	0	13	27	0	0	1	3	11	22	0	0	1.01333	2.11111	1.1068	2.30583	-0.533459	-0.889781	0.356322		0	0	0	0	0	0	0	0	0	0	0	0	0	0	0	0	0	0	0	0	0	0	1	0	0	0	0
PF00648	Peptidase_C2	Calpain family cysteine protease	8	8	162	29	13	3	15	4	133	28	1.04018	1.1102	12.4978	2.70222	0.0218802	0.0355598	0.0543315	0.0703627	-0.0160312		-1	1	-2	5	-1	3	0	1	-1	0	1	-2	-6	2	-2	2	27	0	-2	20	20	46	56	6	31	4	8
PF00649	Copper-fist	Copper fist DNA binding domain	0	0	0	0	0	0	0	0	0	0	0	0	0	0	0	0	FALSE	FALSE	FALSE		0	0	0	0	0	0	0	0	0	0	0	0	0	0	0	0	0	0	0	0	0	0	0	0	0	0	0
PF00650	CRAL_TRIO	CRAL/TRIO domain	8	11	171	49	9	8	17	4	144	46	0.661981	1.89474	13.5956	4.22222	1.68841	3.6455	-0.712623	1.2501	-1.96272		-3	-6	-4	21	7	6	-2	1	-2	1	-6	-2	-6	4	-3	-3	13	1	-2	36	8	34	54	-2	21	3	22
PF00651	BTB	BTB/POZ domain	5	11	55	122	1	14	11	9	44	106	0.215311	1.44165	4.64444	9.71111	3.11838	2.04838	-1.11118	0.817105	-1.92829		-3	-20	-2	115	13	4	-1	0	-2	0	-16	-2	-17	0	-12	-4	107	47	-21	4	-10	14	0	-29	-6	0	3
PF00652	Ricin_B_lectin	Ricin-type beta-trefoil lectin domain	6	6	46	97	2	10	0	8	48	79	0.493421	1.36116	4.05333	7.34667	1.13194	1.03681	-0.54157	0.510654	-1.05222		1	3	-1	-1	0	1	0	0	0	0	-2	0	-1	-1	1	0	16	6	-2	4	-7	4	3	-3	-3	0	0
PF00653	BIR	Inhibitor of Apoptosis domain	0	0	5	15	0	1	1	1	3	12	0	0.910931	0.337778	1.09778	0.368932	0.00944995	-0.264731	-0.0350059	-0.229725		0	0	0	0	0	0	0	0	0	0	0	0	0	0	0	0	0	0	0	0	-1	-1	0	-1	0	0	0
PF00654	Voltage_CLC	Voltage gated chloride channel	8	6	169	33	13	3	17	3	138	31	0.993209	1.04489	13.0889	2.87111	0.000654665	0.00627279	-0.00895689	0.0283194	-0.0372763		-1	-2	2	8	1	0	0	1	0	0	2	-1	-2	0	1	-1	16	1	-1	19	11	50	47	5	16	7	4
PF00656	Peptidase_C14	Caspase domain	5	3	153	31	7	3	16	3	128	26	0.575658	1.22505	12.16	2.44889	2.38138	0.134303	-0.91084	0.146295	-1.05713		0	-2	0	7	2	3	0	0	0	0	-4	0	-1	0	0	0	23	0	1	30	18	33	30	8	20	6	9
PF00657	Lipase_GDSL	GDSL-like Lipase/Acylhydrolase	8	10	164	23	12	5	15	2	138	25	0.928793	2.19298	12.92	2.28	0.0710763	3.49385	-0.102496	1.21044	-1.31293		1	-2	-1	7	5	1	-1	1	0	-1	-3	1	-2	-1	-1	-4	3	4	-4	23	15	20	33	2	24	2	8
PF00658	PABP	Poly-adenylate binding protein, unique domain	3	5	46	40	4	6	4	1	37	34	1.15533	2.03008	3.46222	2.95556	0.090494	3.37963	0.117163	1.18041	-1.06325		1	6	0	0	0	0	0	0	0	0	-1	0	-2	-1	-1	0	7	0	-1	0	-3	1	2	-6	0	0	0
PF00659	POLO_box	POLO box duplicated region	3	1	20	32	1	1	2	5	18	24	0.592105	0.408348	1.68889	2.44889	0.305569	0.933433	-0.236264	-0.476289	0.240026		0	0	0	0	0	1	0	0	-1	0	1	0	0	0	0	0	1	0	0	0	0	6	0	0	0	-1	0
PF00662	Proton_antipo_N	NADH-Ubiquinone oxidoreductase (complex I), chain 5 N-terminus	0	0	1	10	0	2	0	1	1	6	0	3.38346	0.0844444	0.591111	0.092233	3.59408	-0.118411	1.23668	-1.35509		0	0	0	0	0	0	0	0	0	0	0	0	0	0	0	0	0	0	0	0	0	0	0	0	0	0	0
PF00664	ABC_membrane	ABC transporter transmembrane region	8	10	185	36	10	6	17	4	157	34	0.680581	1.86981	14.6933	3.20889	1.62924	2.61871	-0.695062	0.976293	-1.67136		4	-5	1	18	2	2	-1	0	1	-1	-10	-5	-8	-3	-4	-2	26	4	-3	69	40	93	132	13	39	26	30
PF00665	rve	Integrase core domain	6	8	145	13	6	8	17	3	123	10	0.507519	7.28745	11.8222	1.09778	3.11997	45.7911	-1.11161	10.8809	-11.9925		0	8	-1	-1	-1	1	0	0	4	-7	-16	0	-1	-2	2	0	303	17	-9	0	0	0	6	0	2	4	23
PF00667	FAD_binding_1	FAD binding domain	5	6	167	26	11	4	15	2	137	24	0.856994	1.82186	12.8356	2.19556	0.284932	1.60011	-0.226589	0.68637	-0.912958		-1	0	-2	1	1	3	0	0	0	0	-1	2	-1	0	-1	-1	8	0	0	12	8	18	29	5	5	6	8
PF00668	Condensation	Condensation domain	5	4	49	68	7	7	7	2	35	58	1.97368	1.38158	3.54667	5.06667	3.62482	0.798071	1.24471	0.429842	0.814866		0	0	2	1	0	0	0	-1	0	-1	1	0	-1	1	0	0	3	0	-1	0	-5	4	4	-5	1	0	1
PF00669	Flagellin_N	Bacterial flagellin N-terminal helical region	0	0	6	32	0	4	0	4	5	24	0	1.69173	0.422222	2.36444	0.461165	1.22163	-0.303574	0.57018	-0.873754		0	0	0	0	0	0	0	0	0	0	0	0	0	0	0	0	0	0	0	0	0	0	0	0	0	0	0
PF00670	AdoHcyase_NAD	S-adenosyl-L-homocysteine hydrolase, NAD binding domain	4	3	47	47	4	5	5	5	42	35	1.00784	1.48026	3.96889	3.37778	0.000264452	0.84232	0.00567168	0.445227	-0.439556		0	-1	0	1	0	-1	0	0	0	0	0	0	1	-1	0	0	7	0	1	0	-3	5	6	-2	1	-1	0
PF00672	HAMP	HAMP domain	0	0	15	53	0	5	1	7	12	38	0	1.31579	1.09778	3.8	1.19903	0.410116	-0.563018	0.282404	-0.845422		0	0	0	0	0	0	0	0	0	0	0	0	0	0	0	0	0	0	0	0	-1	2	5	0	0	0	1
PF00673	Ribosomal_L5_C	ribosomal L5P family C-terminus	4	1	39	41	4	1	2	0	36	38	1.24654	0.311634	3.20889	3.20889	0.211172	1.65685	0.189868	-0.70327	0.893138		1	0	0	0	0	0	0	0	1	-1	0	0	0	0	0	0	3	1	0	1	1	-1	4	-3	1	0	0
PF00675	Peptidase_M16	Insulinase (Peptidase family M16)	6	6	176	31	12	4	17	3	144	28	0.882641	1.52801	13.5956	2.61778	0.203223	0.788832	-0.185665	0.426602	-0.612267		0	-1	-1	4	3	3	0	0	0	0	-2	0	-3	1	-2	0	5	-1	1	8	4	41	39	2	18	8	9
PF00676	E1_dh	Dehydrogenase E1 component	5	4	68	65	1	10	4	7	67	47	0.16679	2.19298	5.99556	4.56	4.54044	6.9877	-1.48013	2.08581	-3.56594		0	-1	0	3	0	1	0	0	0	0	-1	0	-2	0	4	0	1	-2	1	2	-4	0	11	-3	0	0	0
PF00677	Lum_binding	Lumazine binding domain	4	1	18	45	0	2	2	2	19	39	0	0.577664	1.77333	3.46222	1.93689	0.671627	-0.78514	-0.384592	-0.400548		0	0	0	0	0	1	1	0	0	0	-1	0	0	0	0	1	1	0	0	0	0	0	0	0	0	0	0
PF00679	EFG_C	Elongation factor G C-terminus	7	4	171	27	14	3	15	2	140	24	1.06961	1.3664	13.0889	2.19556	0.0687463	0.318889	0.100633	0.242394	-0.141761		-1	-2	-1	3	1	1	0	0	0	0	1	1	-1	1	0	0	2	0	0	12	12	20	39	9	13	10	10
PF00680	RdRP_1	Viral RNA-dependent RNA polymerase	0	0	0	9	0	1	0	1	0	7	0	1.48026	0	0.675556	0	0.168464	FALSE	0.166546	FALSE		0	0	0	0	0	0	0	0	0	0	0	0	0	0	0	0	0	0	0	0	0	0	0	0	0	0	0
PF00681	Plectin	Plectin repeat	0	0	0	0	0	0	0	0	0	0	0	0	0	0	0	0	FALSE	FALSE	FALSE		0	0	0	0	0	0	0	0	0	0	0	0	0	0	0	0	0	0	0	0	0	0	0	0	0	0	0
PF00682	HMGL-like	HMGL-like	5	5	58	68	5	5	5	6	52	58	1.03878	0.925164	4.81333	5.40444	0.00784846	0.0328389	0.0317943	-0.0674254	0.0992197		1	0	0	2	-1	1	0	0	-1	0	1	-1	-2	0	0	1	-2	0	0	4	0	-1	4	-1	-1	0	-1
PF00684	DnaJ_CXXCXGXG	DnaJ central domain	3	5	50	48	5	9	4	4	42	38	1.28719	2.53759	3.88444	3.54667	0.346784	9.01171	0.254973	2.57145	-2.31648		0	-1	-1	2	-1	5	0	0	0	0	-1	0	0	0	0	0	1	0	-1	1	-5	0	5	-9	-1	2	0
PF00685	Sulfotransfer_1	Sulfotransferase domain	8	8	228	0	17	2	21	0	190	6	0.954103	3.94737	17.8178	0.506667	0.0407151	4.69901	-0.0756748	1.52028	-1.59595		-1	-5	-2	13	3	3	0	0	-3	2	7	0	-1	2	-2	-2	2	-3	3	20	20	17	34	9	9	7	7
PF00686	CBM_20	Starch binding domain	5	6	91	27	6	4	5	3	78	24	0.856056	1.75439	7.00889	2.28	0.157638	1.40055	-0.160308	0.625928	-0.786236		0	1	-5	-1	0	10	2	1	-1	0	-1	-6	-1	0	0	0	25	0	0	23	9	39	69	4	36	0	0
PF00687	Ribosomal_L1	Ribosomal protein L1p/L10e family	5	5	59	58	4	4	5	2	53	52	0.816697	0.877193	4.89778	4.56	0.178681	0.0746402	-0.172302	-0.105298	-0.0670034		-2	-1	0	1	1	0	0	0	0	0	-2	-1	0	1	0	0	1	1	-1	4	0	-1	23	-1	-1	0	1
PF00688	TGFb_propeptide	TGF-beta propeptide	0	0	3	21	0	1	0	3	3	17	0	0.592105	0.253333	1.68889	0.276699	0.305569	-0.222665	-0.236264	0.0135983		0	0	0	0	0	0	0	0	0	0	0	0	0	0	0	0	0	0	0	0	0	0	0	0	0	0	0
PF00689	Cation_ATPase_C	Cation transporting ATPase, C-terminus	7	6	169	33	11	4	16	3	140	30	0.83502	1.43541	13.1733	2.78667	0.389262	0.571323	-0.273527	0.347045	-0.620572		1	0	0	3	1	2	0	0	-1	2	-2	0	-2	-1	0	-1	4	-2	2	18	11	16	42	6	11	8	7
PF00690	Cation_ATPase_N	Cation transporter/ATPase, N-terminus	10	6	168	33	12	5	16	3	141	29	0.905129	1.85033	13.2578	2.70222	0.129484	2.10781	-0.143291	0.834016	-0.977307		2	-2	-1	4	1	3	0	0	0	1	3	1	-2	-1	1	-3	3	-3	1	3	3	15	23	2	8	5	5
PF00691	OmpA	OmpA family	3	2	32	57	3	6	2	7	26	43	1.2688	1.42105	2.36444	4.22222	0.184941	0.809578	0.17577	0.433863	-0.258093		0	2	0	0	0	-1	0	0	0	0	-1	0	0	1	0	0	2	0	0	0	0	1	4	-4	0	0	0
PF00692	dUTPase	dUTPase	2	0	28	29	2	1	1	3	27	22	0.845865	0.473684	2.36444	2.11111	0.0609799	0.636475	-0.094229	-0.371621	0.277392		0	0	0	0	0	1	0	0	0	0	0	0	1	0	0	0	0	0	0	0	-2	0	1	0	0	0	0
PF00694	Aconitase_C	Aconitase C-terminal domain	2	1	42	22	2	3	2	1	39	17	0.577664	1.97368	3.46222	1.52	0.671627	1.5535	-0.384592	0.672396	-1.05699		0	0	0	0	0	0	0	0	0	1	0	0	-1	0	0	0	1	0	0	3	-1	0	1	-2	0	0	0
PF00696	AA_kinase	Amino acid kinase family	7	8	169	24	10	5	17	2	141	23	0.7495	2.36842	13.3422	2.11111	0.909452	4.25246	-0.468189	1.40679	-1.87498		1	0	-2	2	3	2	0	0	-1	1	2	0	-1	-1	-1	-1	-1	-2	3	6	3	6	8	0	6	7	7
PF00697	PRAI	N-(5'phosphoribosyl)anthranilate (PRA) isomerase	0	1	21	38	0	2	1	1	20	35	0	0.657895	1.77333	3.04	1.93689	0.386728	-0.78514	-0.272439	-0.512701		-1	0	0	0	0	0	0	0	0	0	0	0	0	0	0	0	0	0	0	0	-1	0	1	-1	0	0	0
PF00698	Acyl_transf_1	Acyl transferase domain	5	4	159	17	11	1	14	1	130	17	0.904605	0.657895	12.16	1.52	0.120078	0.193364	-0.137302	-0.18037	0.0430671		1	-1	0	7	0	-1	0	0	1	-1	2	0	-1	0	0	0	7	0	0	60	45	54	77	22	9	2	2
PF00699	Urease_beta	Urease beta subunit	2	3	17	48	0	4	2	5	17	39	0	1.07656	1.60444	3.71556	1.75243	0.0236027	-0.731488	0.0565548	-0.788043		1	0	-1	0	0	0	-1	0	0	1	0	0	0	0	0	0	0	-1	0	0	-1	0	0	0	0	0	0
PF00700	Flagellin_C	Bacterial flagellin C-terminal helical region	0	0	0	0	0	0	0	0	0	0	0	0	0	0	0	0	FALSE	FALSE	FALSE		0	0	0	0	0	0	0	0	0	0	0	0	0	0	0	0	0	0	0	0	0	0	0	0	0	0	0
PF00701	DHDPS	Dihydrodipicolinate synthetase family	5	1	43	35	1	2	2	0	44	32	0.257437	0.740132	3.88444	2.70222	2.33485	0.198241	-0.897885	-0.183001	-0.714885		2	0	0	2	0	1	0	1	0	0	0	0	0	0	0	0	-1	0	1	1	0	0	7	-1	0	0	0
PF00702	Hydrolase	haloacid dehalogenase-like hydrolase	9	10	171	58	8	11	17	4	147	50	0.577664	2.41228	13.8489	4.56	2.68651	9.78128	-0.994813	2.75375	-3.74857		1	-2	-12	6	6	11	-3	3	-2	2	-2	1	-7	-1	-2	-4	9	-5	4	29	1	45	75	-14	26	17	15
PF00703	Glyco_hydro_2	Glycosyl hydrolases family 2	4	3	30	63	1	6	2	6	26	50	0.422932	1.2688	2.36444	4.72889	0.857272	0.369883	-0.45038	0.265146	-0.715526		3	3	-2	0	0	2	0	0	0	0	0	0	-2	-1	0	0	3	0	0	0	0	0	2	-1	0	0	0
PF00704	Glyco_hydro_18	Glycosyl hydrolases family 18	6	8	149	21	10	4	13	2	123	21	0.870743	2.0595	11.4844	1.94222	0.208256	2.3492	-0.188333	0.901884	-1.09022		1	-2	-1	10	1	0	0	0	0	-1	-3	0	-1	-1	-2	-1	2	2	1	5	4	4	12	0	2	3	2
PF00705	PCNA_N	Proliferating cell nuclear antigen, N-terminal domain	4	1	28	26	5	2	1	0	26	21	2.19298	1.12782	2.28	1.77333	3.49385	0.0313929	1.21044	0.0658215	1.14462		0	-1	1	0	1	0	0	0	0	0	0	0	1	0	0	0	3	0	0	0	-1	0	4	-1	0	0	0
PF00707	IF3_C	Translation initiation factor IF-3, C-terminal domain	3	4	34	42	3	3	3	3	31	35	1.04489	0.934903	2.87111	3.20889	0.00627279	0.0147527	0.0283194	-0.0441553	0.0724747		-1	1	-1	0	1	0	-1	0	0	1	0	0	0	0	0	0	0	-1	0	2	0	0	2	-1	0	-1	0
PF00708	Acylphosphatase	Acylphosphatase	3	6	24	41	0	5	2	3	22	37	0	1.48026	2.02667	3.37778	2.21359	0.84232	-0.863915	0.445227	-1.30914		-1	-1	-1	0	1	1	0	0	0	0	-1	0	-1	0	0	0	0	1	-1	0	0	-1	0	-1	-1	0	0
PF00709	Adenylsucc_synt	Adenylosuccinate synthetase	3	0	38	25	1	2	2	0	36	22	0.311634	1.07656	3.20889	1.85778	1.65685	0.0118013	-0.70327	0.0392949	-0.742565		0	0	0	2	0	0	0	0	0	1	0	0	0	0	0	0	4	0	0	3	0	0	5	-1	0	0	0
PF00710	Asparaginase	Asparaginase, N-terminal	2	3	43	55	0	6	5	4	37	44	0	1.48026	3.54667	4.05333	3.87379	1.01078	-1.3094	0.502082	-1.81148		0	0	0	1	0	0	0	0	0	0	-1	1	-1	0	0	0	0	-1	0	0	-1	0	0	-2	-1	0	-1
PF00711	Defensin_beta	Beta defensin	0	0	0	0	0	0	0	0	0	0	0	0	0	0	0	0	FALSE	FALSE	FALSE		0	0	0	0	0	0	0	0	0	0	0	0	0	0	0	0	0	0	0	0	0	0	0	0	0	0	0
PF00712	DNA_pol3_beta	DNA polymerase III beta subunit, N-terminal domain	0	0	0	0	0	0	0	0	0	0	0	0	0	0	0	0	FALSE	FALSE	FALSE		0	0	0	0	0	0	0	0	0	0	0	0	0	0	0	0	0	0	0	0	0	0	0	0	0	0	0
PF00717	Peptidase_S24	Peptidase S24-like	6	4	65	73	5	7	9	4	54	61	0.93985	1.2753	5.32	5.48889	0.0208818	0.450346	-0.053007	0.299149	-0.352156		0	0	-1	3	1	2	0	1	0	0	2	0	-2	0	-1	0	-3	0	1	0	-2	0	-1	-2	0	0	1
PF00719	Pyrophosphatase	Inorganic pyrophosphatase	5	4	56	40	4	6	8	1	48	35	0.845865	1.97368	4.72889	3.04	0.12196	3.10699	-0.138514	1.10815	-1.24666		3	0	2	1	0	-1	0	0	0	0	-1	0	-1	-2	0	0	2	1	0	5	-1	-1	2	-2	-1	0	0
PF00722	Glyco_hydro_16	Glycosyl hydrolases family 16	4	5	155	22	9	3	12	2	129	21	0.755879	1.54462	11.9067	1.94222	0.770759	0.622598	-0.420237	0.366447	-0.786684		3	-2	0	4	0	0	-1	0	0	0	-2	0	0	-1	0	-2	12	1	0	20	16	23	23	5	1	4	4
PF00723	Glyco_hydro_15	Glycosyl hydrolases family 15	0	0	13	29	0	3	0	2	11	22	0	1.48026	0.928889	2.02667	1.01456	0.505392	-0.50333	0.321354	-0.824684		0	0	0	0	0	0	0	0	0	0	0	0	0	0	0	0	0	0	0	0	0	0	3	-1	0	0	0
PF00724	Oxidored_FMN	NADH:flavin oxidoreductase / NADH oxidase family	2	5	38	50	1	4	6	3	32	45	0.311634	0.986842	3.20889	4.05333	1.65685	0.00076108	-0.70327	-0.00966513	-0.693605		0	0	-1	2	-1	0	0	-1	0	-1	0	-1	0	0	0	0	1	0	0	1	0	0	3	-1	0	0	2
PF00725	3HCDH	3-hydroxyacyl-CoA dehydrogenase, C-terminal domain	4	2	52	49	3	6	3	4	47	39	0.710526	1.65239	4.22222	3.63111	0.384426	1.66912	-0.271448	0.706911	-0.978359		1	0	0	2	1	0	0	0	-1	0	0	0	-2	0	0	0	1	0	0	5	-1	0	6	-1	0	0	2
PF00728	Glyco_hydro_20	Glycosyl hydrolase family 20, catalytic domain	6	5	53	64	3	6	5	4	46	58	0.696594	1.14601	4.30667	5.23556	0.430808	0.120927	-0.291076	0.13785	-0.428926		3	0	-1	2	2	2	0	0	0	0	2	0	-2	-1	-1	0	3	0	-2	-1	-3	2	7	0	1	0	-2
PF00730	HhH-GPD	HhH-GPD superfamily base excision DNA repair protein	4	8	64	67	7	6	8	4	49	60	1.45429	1.1102	4.81333	5.40444	1.07418	0.0711195	0.522873	0.10253	0.420342		-1	-2	-1	4	1	0	1	0	-1	0	1	-1	-1	0	-2	0	0	-1	0	0	-2	5	0	-1	1	2	0
PF00731	AIRC	AIR carboxylase	4	3	39	36	4	4	3	1	33	31	1.31579	1.48026	3.04	2.70222	0.328093	0.673856	0.246582	0.385408	-0.138826		0	0	1	0	0	0	0	1	-1	0	0	0	0	0	1	0	-1	1	-1	2	-1	0	0	-3	0	0	0
PF00732	GMC_oxred_N	GMC oxidoreductase	5	3	44	58	3	5	5	3	38	50	0.826193	1.11718	3.63111	4.47556	0.119092	0.0665929	-0.136664	0.0988885	-0.235553		0	-1	0	5	2	1	0	0	0	0	0	0	-2	0	1	-2	2	0	0	0	-11	4	1	-10	-1	0	-1
PF00733	Asn_synthase	Asparagine synthase	8	5	62	65	6	5	6	3	54	57	1.18421	0.986842	5.06667	5.06667	0.186226	0.000951349	0.176476	-0.0108199	0.187296		0	-4	-1	1	3	1	0	-1	1	0	0	1	2	1	-1	0	0	2	-1	0	-2	7	17	-5	-1	0	0
PF00734	CBM_1	Fungal cellulose binding domain	2	2	21	35	1	6	1	1	19	28	0.592105	2.45009	1.68889	2.44889	0.305569	5.53684	-0.236264	1.73002	-1.96628		0	0	0	3	0	0	0	0	0	0	-1	0	-1	0	0	0	18	0	0	1	-1	0	1	-13	2	0	0
PF00735	Septin	Septin	4	5	32	50	4	3	4	3	28	45	1.48026	0.740132	2.70222	4.05333	0.673856	0.297362	0.385408	-0.232442	0.61785		-1	-1	0	5	1	1	0	0	0	0	2	0	-1	0	-1	0	-1	0	0	0	-1	0	0	-1	0	0	0
PF00736	EF1_GNE	EF-1 guanine nucleotide exchange domain	3	2	23	26	3	2	4	2	19	24	1.54462	0.910931	1.94222	2.19556	0.622598	0.0188999	0.366447	-0.050291	0.416738		1	0	-1	0	0	0	0	0	0	0	1	0	0	0	2	0	-1	0	0	0	-1	0	4	0	0	0	0
PF00737	PsbH	Photosystem II 10 kDa phosphoprotein	0	0	0	0	0	0	0	0	0	0	0	0	0	0	0	0	FALSE	FALSE	FALSE		0	0	0	0	0	0	0	0	0	0	0	0	0	0	0	0	0	0	0	0	0	0	0	0	0	0	0
PF00742	Homoserine_dh	Homoserine dehydrogenase	3	5	50	51	1	4	8	3	42	45	0.236842	0.986842	4.22222	4.05333	2.68102	0.00076108	-0.993318	-0.00966513	-0.983653		0	0	0	2	3	0	0	0	0	0	-2	0	-1	-1	-1	-1	0	1	0	0	-1	6	6	-1	0	0	0
PF00743	FMO-like	Flavin-binding monooxygenase-like	8	4	80	80	7	9	10	4	67	66	1.07656	1.52256	6.50222	5.91111	0.0413047	1.74466	0.0762634	0.729206	-0.652943		4	-4	0	12	0	1	1	0	0	0	1	0	0	-2	-3	2	8	3	-2	2	-4	1	3	-8	0	0	3
PF00745	GlutR_dimer	Glutamyl-tRNAGlu reductase, dimerisation domain	3	0	29	23	1	0	1	0	27	20	0.422932	0	2.36444	1.68889	0.857272	1.84466	-0.45038	-0.758439	0.308059		0	0	0	1	0	1	0	0	0	0	0	0	0	0	0	0	1	0	0	0	-2	1	3	-1	0	0	1
PF00749	tRNA-synt_1c	tRNA synthetases class I (E and Q), catalytic domain	7	0	57	51	1	6	6	3	56	39	0.191002	1.69173	5.23556	3.54667	3.73713	1.83244	-1.27396	0.754883	-2.02884		1	0	0	2	1	1	0	1	0	0	0	0	0	0	0	0	1	1	0	3	-3	0	5	-3	0	0	1
PF00750	tRNA-synt_1d	tRNA synthetases class I (R)	1	2	43	43	0	3	4	3	39	34	0	0.960171	3.63111	3.12444	3.96602	0.0053765	-1.33323	-0.0261576	-1.30707		0	0	0	0	0	0	0	0	0	0	0	1	-1	0	-1	0	0	0	0	0	0	0	6	-1	0	0	0
PF00752	XPG_N	XPG N-terminal domain	4	4	66	68	6	6	4	3	57	60	1.1648	1.12782	5.15111	5.32	0.151546	0.0941786	0.156728	0.119798	0.0369303		-1	0	-1	2	0	0	0	-1	0	1	-1	1	0	1	0	0	0	0	0	3	0	-1	3	-1	1	0	3
PF00753	Lactamase_B	Metallo-beta-lactamase superfamily	9	8	175	34	13	4	16	3	146	33	0.950292	1.31579	13.68	3.04	0.0366675	0.328093	-0.0715306	0.246582	-0.318113		-1	-1	-2	4	0	2	1	0	-1	2	1	-2	-2	1	1	-1	9	-1	1	19	12	27	26	6	6	9	9
PF00754	F5_F8_type_C	F5/8 type C domain	5	11	68	110	5	13	7	12	57	91	0.925164	1.49463	5.40444	8.69778	0.0328389	2.30052	-0.0674254	0.888299	-0.955725		1	-5	5	15	-1	-1	-2	0	0	-1	-2	-1	-1	-2	-1	0	11	8	-2	-7	-2	16	12	0	3	0	0
PF00755	Carn_acyltransf	Choline/Carnitine o-acyltransferase	3	4	40	42	4	3	4	2	33	40	1.28023	0.845865	3.12444	3.54667	0.265595	0.0914698	0.217311	-0.117864	0.335175		0	-1	4	1	0	-1	0	0	0	0	-1	0	2	0	0	0	-1	0	0	0	0	0	6	0	0	0	0
PF00756	Esterase	Putative esterase	4	5	66	74	3	7	7	4	56	64	0.56391	1.21904	5.32	5.74222	1.10043	0.298346	-0.531399	0.232903	-0.764302		0	-2	-1	8	0	2	0	0	0	0	-2	0	-1	0	-1	1	6	0	0	1	-4	3	7	-11	1	3	-1
PF00759	Glyco_hydro_9	Glycosyl hydrolase family 9	1	3	11	33	0	4	0	4	12	28	0	1.48026	1.01333	2.70222	1.1068	0.673856	-0.533459	0.385408	-0.918867		0	0	-1	0	0	0	0	0	0	2	-1	0	0	0	0	0	-1	0	0	0	0	0	0	0	0	0	0
PF00762	Ferrochelatase	Ferrochelatase	5	0	38	23	2	1	3	2	35	17	0.623269	0.623269	3.20889	1.60444	0.495148	0.247574	-0.317278	-0.208458	-0.10882		1	0	1	3	0	0	0	0	0	0	0	0	0	0	0	1	0	1	0	1	0	0	0	-1	0	0	0
PF00763	THF_DHG_CYH	Tetrahydrofolate dehydrogenase/cyclohydrolase, catalytic domain	4	7	55	47	4	5	9	0	43	46	0.910931	1.28719	4.39111	3.88444	0.0377998	0.346784	-0.0727088	0.254973	-0.327682		-1	0	0	1	2	0	0	0	0	-1	-2	0	-1	1	-1	-1	0	1	-1	0	-4	1	2	-4	0	0	0
PF00764	Arginosuc_synth	Arginosuccinate synthase	2	0	37	26	1	1	4	0	32	21	0.328947	0.56391	3.04	1.77333	1.49149	0.36681	-0.653676	-0.263804	-0.389872		0	0	1	1	0	0	0	0	0	0	0	0	0	0	0	0	0	0	0	0	-2	4	6	-1	0	0	0
PF00765	Autoind_synth	Autoinducer synthase	0	0	0	11	0	1	0	3	0	6	0	1.31579	0	0.76	0	0.0820232	FALSE	0.110937	FALSE		0	0	0	0	0	0	0	0	0	0	0	0	0	0	0	0	0	0	0	0	0	0	0	0	0	0	0
PF00766	ETF_alpha	Electron transfer flavoprotein FAD-binding domain	2	1	27	24	2	2	3	2	23	18	0.910931	1.18421	2.19556	1.68889	0.0188999	0.0620753	-0.050291	0.0951518	-0.145443		0	-1	1	0	0	0	0	0	0	0	0	0	0	0	0	0	0	1	0	-1	-1	0	4	0	0	0	0
PF00768	Peptidase_S11	D-alanyl-D-alanine carboxypeptidase	0	0	7	23	0	4	0	4	7	15	0	2.49307	0.591111	1.60444	0.645631	3.84496	-0.375018	1.30194	-1.67696		0	0	0	0	0	0	0	0	0	0	0	0	0	0	0	0	0	0	0	0	0	0	0	0	0	0	0
PF00769	ERM	Ezrin/radixin/moesin family	0	0	8	57	0	3	0	6	8	44	0	0.710526	0.675556	4.22222	0.737864	0.384426	-0.40855	-0.271448	-0.137102		0	0	0	0	0	0	0	0	0	0	0	0	0	0	0	0	0	0	0	0	-3	0	0	-1	0	1	-1
PF00771	FHIPEP	FHIPEP family	0	0	2	6	0	1	0	1	2	4	0	2.36842	0.168889	0.422222	0.184466	0.850493	-0.175508	0.448046	-0.623554		0	0	0	0	0	0	0	0	0	0	0	0	0	0	0	0	0	0	0	0	0	0	0	0	0	0	0
PF00772	DnaB	DnaB-like helicase N terminal domain	0	0	3	9	0	2	0	3	2	4	0	3.38346	0.168889	0.591111	0.184466	3.59408	-0.175508	1.23668	-1.41219		0	0	0	0	0	0	0	0	0	0	0	0	0	0	0	0	0	0	0	0	0	0	0	0	0	0	0
PF00773	RNB	RNB domain	6	2	68	77	8	5	10	5	53	64	1.50376	0.858124	5.32	5.82667	1.45943	0.127309	0.643934	-0.141921	0.785855		-3	-1	0	2	1	0	0	0	0	0	1	0	0	2	0	0	2	1	0	0	-1	1	0	-1	0	0	0
PF00775	Dioxygenase_C	Dioxygenase	0	0	16	31	0	0	1	3	15	27	0	0	1.35111	2.53333	1.47573	2.76699	-0.648892	-1.0167	0.367812		0	0	0	0	0	0	0	0	0	0	0	0	0	0	0	0	0	0	0	0	-1	0	-1	0	0	0	0
PF00777	Glyco_transf_29	Glycosyltransferase family 29 (sialyltransferase)	3	7	56	63	3	8	3	7	48	53	0.696594	1.57895	4.30667	5.06667	0.430808	1.83497	-0.291076	0.755619	-1.0467		-1	-6	-1	8	0	1	-1	0	0	0	-1	-1	3	0	0	0	-1	0	0	37	10	24	33	0	72	0	0
PF00778	DIX	DIX domain	0	0	0	0	0	0	0	0	0	0	0	0	0	0	0	0	FALSE	FALSE	FALSE		0	0	0	0	0	0	0	0	0	0	0	0	0	0	0	0	0	0	0	0	0	0	0	0	0	0	0
PF00779	BTK	BTK motif	2	6	1	18	0	4	0	1	2	17	0	2.63158	0.168889	1.52	0.184466	4.34663	-0.175508	1.43083	-1.60634		0	-1	-1	3	0	0	0	0	1	0	-1	0	-1	0	0	0	-1	-1	0	0	0	0	0	0	0	0	0
PF00780	CNH	CNH domain	1	4	11	38	2	4	1	2	9	34	2.36842	1.31579	0.844444	3.04	1.70099	0.328093	0.716339	0.246582	0.469757		-1	0	-1	-1	0	0	0	0	0	0	0	0	1	0	0	0	-1	0	0	0	-1	0	0	-1	0	0	0
PF00781	DAGK_cat	Diacylglycerol kinase catalytic domain	6	6	68	61	4	7	6	6	60	49	0.717703	1.50718	5.57333	4.64444	0.482568	1.29142	-0.312238	0.592124	-0.904362		1	0	-3	0	0	2	0	0	1	0	-1	-1	-2	-1	1	0	5	-1	2	2	-2	1	0	-6	1	0	1
PF00782	DSPc	Dual specificity phosphatase, catalytic domain	6	12	91	117	3	14	9	9	78	102	0.408348	1.4936	7.34667	9.37333	2.8003	2.46885	-1.02573	0.935082	-1.96082		-1	-3	-3	8	1	15	-1	-1	-1	0	-5	-3	-4	2	-3	-1	46	1	-1	3	-23	19	20	-37	5	-1	-1
PF00784	MyTH4	MyTH4 domain	2	1	37	44	5	2	1	4	30	35	1.91002	0.607287	2.61778	3.29333	2.33786	0.552269	0.898725	-0.339712	1.23844		0	0	0	0	0	0	0	0	0	-1	3	0	0	2	0	0	0	0	0	1	-3	0	7	-4	0	0	0
PF00785	0	0	0	0	0	0	0	0	0	0	0	0	0	0	0	0	0	0	FALSE	FALSE	FALSE		0	0	0	0	0	0	0	0	0	0	0	0	0	0	0	0	0	0	0	0	0	0	0	0	0	0	0
PF00786	PBD	P21-Rho-binding domain	2	4	15	23	3	1	0	1	13	24	2.73279	0.473684	1.09778	2.11111	3.53897	0.636475	1.22226	-0.371621	1.59389		-1	-1	0	0	0	2	0	0	0	0	0	0	-1	1	0	0	-1	0	0	0	0	0	0	0	0	0	0
PF00787	PX	PX domain	7	6	169	31	12	1	16	3	139	31	0.916808	0.348297	13.0889	2.87111	0.0982903	1.32838	-0.122691	-0.603637	0.480945		-3	2	-5	-1	0	11	0	0	-1	1	7	0	0	6	-3	0	9	-2	1	25	7	30	36	4	22	4	6
PF00788	RA	Ras association (RalGDS/AF-6) domain	0	3	6	34	0	3	0	1	6	31	0	1.1102	0.506667	2.70222	0.553398	0.0355598	-0.340148	0.0703627	-0.410511		-1	0	0	0	0	0	0	0	0	0	-1	0	0	0	0	0	-1	0	0	2	-1	-1	4	-1	0	0	0
PF00789	UBX	UBX domain	6	6	173	23	12	3	15	3	143	22	0.8994	1.42105	13.3422	2.11111	0.146527	0.404789	-0.153739	0.28015	-0.433889		-2	0	-3	1	0	3	1	0	-2	1	0	-1	-2	2	0	0	0	2	-1	9	7	17	16	4	9	10	9
PF00790	VHS	VHS domain	3	1	22	33	4	2	3	1	18	28	2.25564	0.816697	1.77333	2.44889	3.00935	0.0893403	1.08205	-0.116329	1.19838		1	0	0	0	0	1	0	0	0	0	1	0	0	0	0	0	-1	0	0	0	-1	0	1	0	0	0	0
PF00791	ZU5	ZU5 domain	0	0	2	12	1	0	0	0	0	12	0	0	0	1.01333	0	1.1068	0	-0.533459	0.533459		0	0	0	0	0	0	0	0	0	0	0	0	0	0	0	0	0	0	0	0	0	0	0	0	0	0	0
PF00792	PI3K_C2	Phosphoinositide 3-kinase C2	1	3	17	58	0	1	0	5	17	52	0	0.207756	1.43556	4.81333	1.56796	3.29449	-0.676741	-1.15794	0.481196		-1	0	-1	1	0	0	0	0	0	0	0	-1	0	0	0	0	0	0	0	0	0	0	0	0	0	0	0
PF00793	DAHP_synth_1	DAHP synthetase I family	2	1	20	40	2	3	2	5	17	30	1.24654	1.01504	1.60444	2.95556	0.105586	0.000724703	0.127712	0.00942883	0.118283		0	-1	0	0	0	2	0	0	0	0	0	0	2	0	0	0	0	0	0	0	1	0	0	-1	0	0	0
PF00794	PI3K_rbd	PI3-kinase family, ras-binding domain	0	0	1	10	0	0	0	0	1	9	0	0	0.0844444	0.76	0.092233	0.830097	-0.118411	-0.440998	0.322587		0	0	0	0	0	0	0	0	0	0	0	0	0	0	0	0	0	0	0	0	0	0	0	0	0	0	0
PF00795	CN_hydrolase	Carbon-nitrogen hydrolase	7	9	69	75	5	10	10	7	58	62	0.870743	1.71625	5.74222	5.82667	0.104128	3.22716	-0.12672	1.1401	-1.26682		2	-1	-1	5	1	0	-1	3	-1	0	-2	-1	-2	-1	1	0	2	2	-2	2	-3	1	6	-10	0	1	0
PF00796	PSI_8	Photosystem I reaction centre subunit VIII	0	0	1	29	0	2	0	4	1	23	0	0.877193	0.0844444	2.28	0.092233	0.0373201	-0.118411	-0.0722116	-0.0461999		0	0	0	0	0	0	0	0	0	0	0	0	0	0	0	0	0	0	0	-1	-1	-1	0	0	0	0	0
PF00797	Acetyltransf_2	N-acetyltransferase	4	5	34	48	4	1	5	4	26	45	1.52801	0.241676	2.61778	4.13778	0.788832	2.59413	0.426602	-0.969562	1.39616		0	0	0	5	1	-1	0	0	0	0	0	0	-1	1	-1	-1	2	0	-1	0	-1	0	1	0	0	2	-1
PF00800	PDT	Prephenate dehydratase	3	2	36	50	5	2	3	5	28	42	1.91002	0.503919	2.61778	3.96889	2.33786	1.06281	0.898725	-0.519168	1.41789		0	0	0	1	0	0	0	0	0	0	1	0	0	1	0	0	-1	-1	0	0	-1	0	4	-2	0	0	0
PF00801	PKD	PKD domain	0	0	16	30	0	4	4	2	12	23	0	1.89474	1.35111	2.11111	1.47573	1.82275	-0.648892	0.75206	-1.40095		0	0	0	0	0	0	0	0	0	0	0	0	0	0	0	0	0	0	0	0	0	0	0	0	0	0	-1
PF00804	Syntaxin	Syntaxin	6	2	52	48	4	3	8	4	44	40	0.910931	0.807416	4.39111	3.71556	0.0377998	0.149634	-0.0727088	-0.155594	0.0828849		0	1	0	0	2	1	0	0	0	0	2	0	0	-1	-1	0	1	0	1	3	0	0	1	-3	-1	0	2
PF00805	Pentapeptide	Pentapeptide repeats (8 copies)	4	8	58	63	7	8	7	3	45	55	1.59413	1.63339	4.39111	4.89778	1.67466	2.12243	0.708551	0.838165	-0.129614		-3	-15	9	72	0	-4	0	0	0	0	-1	-1	-6	3	-1	0	0	1	-1	0	-2	1	7	0	0	0	0
PF00806	PUF	Pumilio-family RNA binding repeat	3	5	151	28	9	4	14	3	123	25	0.777949	1.69173	11.5689	2.36444	0.619515	1.22163	-0.365294	0.57018	-0.935474		0	-2	-1	1	-1	0	0	0	0	0	-1	-1	0	0	0	0	18	0	1	57	16	38	57	24	21	2	2
PF00808	CBFD_NFYB_HMF	Histone-like transcription factor (CBF/NF-Y) and archaeal histone	7	7	60	74	7	9	7	4	51	63	1.42922	1.59073	4.89778	5.65778	0.975845	2.13315	0.490493	0.841204	-0.350711		4	0	-2	1	0	2	0	1	0	1	6	-1	-2	-2	-2	1	-7	-1	0	0	-1	0	9	-1	0	1	-1
PF00809	Pterin_bind	Pterin binding enzyme	4	2	51	51	3	3	4	2	44	45	0.740132	0.755879	4.05333	3.96889	0.297362	0.25692	-0.232442	-0.213075	-0.0193672		0	-1	2	2	0	-1	0	0	0	0	1	0	0	0	0	0	0	1	0	0	-1	1	9	-3	1	0	0
PF00810	ER_lumen_recept	ER lumen protein retaining receptor	5	5	46	57	3	4	3	4	42	49	0.789474	0.893744	3.8	4.47556	0.182901	0.0548364	-0.174644	-0.0889214	-0.0857224		1	-2	-2	1	0	1	-1	0	-1	0	0	1	0	0	0	0	12	-1	0	1	-3	5	1	-9	1	-1	1
PF00811	Ependymin	Ependymin	0	0	3	17	0	1	0	2	3	14	0	0.740132	0.253333	1.35111	0.276699	0.0991205	-0.222665	-0.12327	-0.0993954		0	0	0	0	0	0	0	0	0	0	0	0	0	0	0	0	0	0	0	0	0	0	0	0	0	0	0
PF00814	TsaD	tRNA N6-adenosine threonylcarbamoyltransferase	3	4	31	63	2	4	4	4	27	56	0.764007	0.789474	2.61778	5.06667	0.158353	0.243868	-0.160725	-0.20661	0.0458854		0	-1	-2	0	0	0	1	0	0	0	2	0	0	1	0	0	-1	0	-1	1	0	0	1	-1	0	0	0
PF00815	Histidinol_dh	Histidinol dehydrogenase	3	0	38	29	2	2	3	3	34	21	0.640114	0.986842	3.12444	2.02667	0.439915	0.00038054	-0.294852	-0.00681238	-0.28804		0	0	0	4	1	0	0	0	0	0	1	0	0	0	0	0	0	0	0	0	-1	0	8	-2	0	0	0
PF00816	Histone_HNS	H-NS histone family	0	0	0	0	0	0	0	0	0	0	0	0	0	0	0	0	FALSE	FALSE	FALSE		0	0	0	0	0	0	0	0	0	0	0	0	0	0	0	0	0	0	0	0	0	0	0	0	0	0	0
PF00817	IMS	impB/mucB/samB family	5	6	66	76	6	6	6	6	55	67	1.1648	0.973324	5.15111	6.16444	0.151546	0.00475804	0.156728	-0.0245651	0.181293		-1	-2	0	7	-1	0	-1	1	-1	0	1	0	-1	0	0	1	1	0	0	0	-2	2	3	0	2	0	2
PF00821	PEPCK_GTP	Phosphoenolpyruvate carboxykinase C-terminal P-loop domain	0	0	3	14	0	2	0	1	2	11	0	1.97368	0.168889	1.01333	0.184466	1.03566	-0.175508	0.510278	-0.685785		0	0	0	0	0	0	0	0	0	0	0	0	0	0	0	0	0	0	0	0	0	0	0	0	0	0	0
PF00822	PMP22_Claudin	PMP-22/EMP/MP20/Claudin family	0	0	1	4	0	0	0	0	0	3	0	0	0	0.253333	0	0.276699	0	-0.222665	0.222665		0	0	0	0	0	0	0	0	0	0	0	0	0	0	0	0	0	0	0	0	0	0	0	0	0	0	0
PF00825	Ribonuclease_P	Ribonuclease P	0	0	4	16	0	3	0	3	4	10	0	2.73279	0.337778	1.09778	0.368932	3.53897	-0.264731	1.22226	-1.487		0	0	0	0	0	0	0	0	0	0	0	0	0	0	0	0	0	0	0	0	0	0	0	0	0	0	0
PF00826	0	0	0	0	0	0	0	0	0	0	0	0	0	0	0	0	0	0	FALSE	FALSE	FALSE		0	0	0	0	0	0	0	0	0	0	0	0	0	0	0	0	0	0	0	0	0	0	0	0	0	0	0
PF00827	Ribosomal_L15e	Ribosomal L15	3	1	32	42	6	1	4	1	21	38	2.84211	0.303644	2.11111	3.29333	7.68725	1.74026	2.25483	-0.727912	2.98274		0	0	0	-1	0	0	0	0	0	0	1	0	1	0	0	0	3	0	0	0	-3	1	9	-2	0	0	0
PF00828	Ribosomal_L27A	Ribosomal proteins 50S-L15, 50S-L18e, 60S-L27A	2	3	161	22	12	2	15	2	128	20	0.993743	1.07656	12.0756	1.85778	0.000512685	0.0118013	-0.00791708	0.0392949	-0.0472119		0	-1	0	0	0	0	0	0	0	0	1	1	0	0	0	0	-1	-1	0	22	10	9	30	10	6	3	3
PF00829	Ribosomal_L21p	Ribosomal prokaryotic L21 protein	3	1	32	43	2	4	3	1	27	36	0.789474	1.28023	2.53333	3.12444	0.121934	0.265595	-0.138498	0.217311	-0.355808		-1	0	0	0	0	0	0	0	1	0	1	0	0	0	0	0	0	2	0	0	0	0	2	-1	0	0	0
PF00830	Ribosomal_L28	Ribosomal L28 family	2	4	31	60	3	1	1	6	28	53	1.22505	0.200714	2.44889	4.98222	0.134303	3.47117	0.146295	-1.20449	1.35078		-1	-1	0	1	0	0	0	0	0	0	2	0	0	0	-1	0	-1	0	0	0	0	0	2	-1	-1	-1	1
PF00831	Ribosomal_L29	Ribosomal L29 protein	1	2	42	52	2	4	4	2	34	44	0.623269	1.02975	3.20889	3.88444	0.495148	0.00372714	-0.317278	0.0216738	-0.338951		0	0	-1	0	0	0	0	0	0	0	-1	0	0	0	0	0	0	1	0	3	0	0	19	-1	0	0	-1
PF00832	Ribosomal_L39	Ribosomal L39 protein	2	3	12	55	4	4	1	3	8	48	5.26316	0.928793	0.76	4.30667	14.6703	0.0236921	3.89262	-0.0566683	3.94929		0	-1	1	0	0	0	0	0	-1	0	0	0	0	1	0	0	-1	0	0	1	0	-1	2	-1	0	0	0
PF00833	Ribosomal_S17e	Ribosomal S17	3	2	29	48	4	4	2	2	24	41	1.82186	1.10159	2.19556	3.63111	1.60011	0.0406136	0.68637	0.075573	0.610796		0	-1	0	1	0	0	0	0	0	0	1	0	0	0	0	0	1	-1	0	-1	0	-2	9	0	-1	0	-1
PF00834	Ribul_P_3_epim	Ribulose-phosphate 3 epimerase family	4	3	56	64	2	6	8	5	47	50	0.430622	1.29187	4.64444	4.64444	1.63926	0.428247	-0.698043	0.290009	-0.988052		2	-2	0	3	0	0	0	0	0	0	1	0	0	-1	0	0	0	2	-1	0	-3	4	5	0	1	0	1
PF00837	T4_deiodinase	Iodothyronine deiodinase	3	2	26	56	3	6	1	9	24	41	1.42105	1.42105	2.11111	4.22222	0.404789	0.809578	0.28015	0.433863	-0.153713		-1	0	0	4	0	0	0	0	0	0	-1	0	0	1	0	0	1	0	0	0	0	1	0	0	-1	0	-1
PF00838	TCTP	Translationally controlled tumour protein	0	3	11	29	0	3	2	2	9	26	0	1.2688	0.928889	2.36444	1.01456	0.184941	-0.50333	0.17577	-0.6791		-1	0	0	0	0	0	0	0	0	0	0	0	-1	0	0	0	-1	0	0	0	0	0	3	0	0	0	0
PF00839	Cys_rich_FGFR	Cysteine rich repeat	0	0	24	36	1	1	2	4	21	27	0.514874	0.382003	1.94222	2.61778	0.497344	1.08886	-0.318154	-0.527646	0.209492		0	0	0	0	0	0	0	0	0	0	0	0	0	0	0	0	0	0	0	1	0	-1	16	-1	1	0	0
PF00840	Glyco_hydro_7	Glycosyl hydrolase family 7	3	4	29	46	2	6	3	3	25	39	0.845865	1.69173	2.36444	3.54667	0.0609799	1.83244	-0.094229	0.754883	-0.849112		-1	0	0	1	0	0	0	0	0	0	-1	0	-2	4	0	0	9	0	-1	9	-17	3	7	-13	6	0	0
PF00842	Ala_racemase_C	Alanine racemase, C-terminal domain	0	3	11	23	0	4	2	2	9	18	0	2.36842	0.928889	1.68889	1.01456	3.40197	-0.50333	1.1863	-1.68963		0	0	0	0	0	0	0	0	0	0	-1	0	0	0	0	0	-1	-1	0	0	0	0	0	0	0	0	0
PF00847	AP2	AP2 domain	7	6	127	30	7	6	10	4	111	25	0.68508	2.45009	10.2178	2.44889	1.10125	5.53684	-0.531665	1.73002	-2.26168		-1	-9	-2	46	0	0	2	0	0	1	-1	1	-4	2	0	0	3	-1	1	1	1	12	4	0	1	1	1
PF00848	Ring_hydroxyl_A	Ring hydroxylating alpha subunit (catalytic domain)	1	3	24	42	0	8	1	6	21	27	0	2.87081	1.85778	2.78667	2.02913	10.4644	-0.811608	2.91472	-3.72633		0	0	0	4	0	0	0	0	0	0	0	-1	-1	-1	0	0	0	0	0	1	-2	1	2	-2	0	0	0
PF00849	PseudoU_synth_2	RNA pseudouridylate synthase	8	10	221	10	16	3	19	1	184	15	0.933368	2.22039	17.1422	1.35111	0.082572	2.16635	-0.111348	0.850593	-0.961941		-8	-10	-3	12	7	3	1	0	-5	2	-7	-1	-1	7	-7	-1	54	2	-2	27	34	104	88	6	8	16	17
PF00850	Hist_deacetyl	Histone deacetylase domain	7	7	174	30	13	3	17	3	142	29	0.968222	1.1102	13.4267	2.70222	0.0147064	0.0355598	-0.0440829	0.0703627	-0.114446		-2	-4	-1	9	1	1	0	0	0	0	5	1	-3	3	2	-1	-2	-1	0	1	1	4	15	0	2	8	8
PF00852	Glyco_transf_10	Glycosyltransferase family 10 (fucosyltransferase) C-term	6	5	58	71	6	4	5	8	47	61	1.3664	0.686499	4.39111	5.82667	0.637777	0.622335	0.372105	-0.366349	0.738454		0	0	0	-1	1	2	-2	1	0	-1	0	0	1	1	0	-1	0	-1	1	8	-1	0	3	-3	0	0	1
PF00854	PTR2	POT family	3	4	46	47	1	7	4	3	40	36	0.269139	2.12551	3.71556	3.29333	2.16331	4.49359	-0.849736	1.46824	-2.31797		0	0	0	1	3	0	-1	0	0	0	-1	0	-1	-1	0	0	5	0	0	0	-2	0	3	-5	0	2	0
PF00855	PWWP	PWWP domain	5	7	35	49	4	3	4	5	30	46	1.39319	0.696594	2.87111	4.30667	0.480144	0.430808	0.311263	-0.291076	0.602338		-1	6	-2	-1	0	1	1	0	1	0	1	0	-1	0	-1	0	-1	0	-1	0	0	0	0	0	0	0	0
PF00856	SET	SET domain	8	10	182	45	13	6	17	3	152	43	0.910931	1.54462	14.2711	3.88444	0.122849	1.2452	-0.139085	0.57762	-0.716705		-15	-9	-13	18	22	16	2	3	-2	0	-16	-11	-9	13	-14	-5	59	4	-4	40	17	111	121	3	34	21	20
PF00857	Isochorismatase	Isochorismatase family	6	9	169	24	11	3	15	4	141	25	0.83502	1.22505	13.1733	2.44889	0.389262	0.134303	-0.273527	0.146295	-0.419822		-1	-2	-1	15	2	1	-1	1	0	0	-1	-1	-3	2	-1	0	7	0	-1	18	17	31	21	4	6	9	9
PF00858	ASC	Amiloride-sensitive sodium channel	0	0	8	21	0	2	2	3	5	15	0	1.31579	0.591111	1.52	0.645631	0.164046	-0.375018	0.164019	-0.539037		0	0	0	0	0	0	0	0	0	0	0	0	0	0	0	0	0	0	0	0	0	0	0	0	0	0	1
PF00860	Xan_ur_permease	Permease family	5	7	52	63	1	8	5	5	49	53	0.219298	1.63339	4.56	4.89778	3.03056	2.12243	-1.08773	0.838165	-1.92589		0	-2	0	6	1	0	-1	0	1	0	-2	-1	0	-1	1	-1	7	0	-1	1	-5	2	0	-6	-2	-1	5
PF00861	Ribosomal_L18p	Ribosomal L18 of archaea, bacteria, mitoch. and chloroplast	1	4	45	44	5	3	4	3	34	39	1.55817	0.845865	3.20889	3.54667	1.08037	0.0914698	0.524889	-0.117864	0.642753		0	-1	0	0	0	0	0	0	0	-1	-1	0	1	0	0	0	0	0	-1	0	-1	5	35	-2	0	0	0
PF00862	Sucrose_synth	Sucrose synthase	0	0	0	0	0	0	0	0	0	0	0	0	0	0	0	0	FALSE	FALSE	FALSE		0	0	0	0	0	0	0	0	0	0	0	0	0	0	0	0	0	0	0	0	0	0	0	0	0	0	0
PF00864	P2X_receptor	ATP P2X receptor	5	6	32	46	2	7	2	7	32	35	0.696594	1.97368	2.87111	3.54667	0.287205	3.62482	-0.227666	1.24471	-1.47237		1	1	-1	0	0	1	0	0	0	0	-1	1	-1	-1	-1	-1	3	0	0	0	-3	1	1	-6	0	0	0
PF00867	XPG_I	XPG I-region	5	7	70	73	8	6	8	6	54	65	1.52801	1.00074	5.23556	5.99556	1.57766	3.57282e-06	0.679651	0.000655477	0.678996		-2	-1	-1	0	0	0	0	-1	0	1	0	2	1	4	-1	0	-1	3	-1	0	-3	0	2	-6	0	-1	2
PF00871	Acetate_kinase	Acetokinase family	0	3	20	35	1	7	0	3	18	26	0.657895	2.85844	1.52	2.44889	0.193364	9.07531	-0.18037	2.58656	-2.76693		0	-1	0	0	0	0	0	0	0	0	-1	0	-1	0	0	0	0	0	0	1	-1	0	1	-1	0	-1	0
PF00872	Transposase_mut	Transposase, Mutator family	0	0	2	15	0	1	0	2	2	12	0	0.845865	0.168889	1.18222	0.184466	0.0304899	-0.175508	-0.0648036	-0.110704		0	0	0	0	0	0	0	0	0	0	0	0	0	0	0	0	0	0	0	0	0	0	0	0	0	0	0
PF00873	ACR_tran	AcrB/AcrD/AcrF family	1	2	18	49	1	3	1	7	16	39	0.696594	0.772311	1.43556	3.88444	0.143603	0.218717	-0.15198	-0.193807	0.0418267		0	0	0	0	0	-1	0	0	0	0	1	0	0	0	0	0	-1	0	0	0	0	0	0	0	2	0	0
PF00875	DNA_photolyase	DNA photolyase	7	9	78	79	7	9	10	6	65	69	1.10526	1.42105	6.33333	6.33333	0.0760492	1.21437	0.106391	0.567882	-0.461491		-2	-1	-3	4	1	1	0	0	0	-1	-1	-1	-1	1	1	-1	9	1	-1	0	-8	6	3	-5	0	0	1
PF00877	NLPC_P60	NlpC/P60 family	0	2	0	24	0	2	0	4	0	20	0	0.986842	0	2.02667	0	0.00038054	FALSE	-0.00681238	FALSE		0	0	0	0	0	0	0	0	0	0	0	-1	0	0	0	0	-1	0	0	0	0	0	0	0	0	0	0
PF00878	CIMR	Cation-independent mannose-6-phosphate receptor repeat	0	0	8	18	0	0	2	1	5	16	0	0	0.591111	1.43556	0.645631	1.56796	-0.375018	-0.676741	0.301723		0	0	0	0	0	0	0	0	0	0	0	0	0	0	0	0	0	0	0	0	0	0	0	0	0	0	0
PF00881	Nitroreductase	Nitroreductase family	4	7	56	59	0	6	10	0	47	56	0	1.2688	4.81333	4.72889	5.25728	0.369883	-1.66045	0.265146	-1.92559		0	-1	0	2	2	-1	0	0	0	0	-2	-1	0	-1	-2	0	2	2	-1	0	0	1	0	-2	0	0	3
PF00882	Zn_dep_PLPC	Zinc dependent phospholipase C	0	0	2	26	0	1	0	1	1	23	0	0.493421	0.0844444	2.02667	0.092233	0.565969	-0.118411	-0.344991	0.22658		0	0	0	0	0	0	0	0	0	0	0	0	0	0	0	0	0	0	0	0	-1	0	-1	0	0	0	0
PF00883	Peptidase_M17	Cytosol aminopeptidase family, catalytic domain	5	5	51	61	4	6	5	4	47	49	0.910931	1.34062	4.39111	4.47556	0.0377998	0.561872	-0.0727088	0.343416	-0.416125		3	0	1	1	1	0	0	0	0	0	0	0	-1	-1	0	-1	-2	1	-1	1	1	-1	0	-2	0	0	0
PF00884	Sulfatase	Sulfatase	6	8	203	0	12	3	16	0	171	5	0.759921	7.10526	15.7911	0.422222	0.988614	16.6149	-0.49474	4.33923	-4.83397		24	-12	0	65	10	0	0	0	-1	1	-3	0	-6	-9	-9	-2	12	4	-7	26	15	23	61	5	19	9	13
PF00885	DMRL_synthase	6,7-dimethyl-8-ribityllumazine synthase	2	1	22	35	2	4	1	1	21	27	1.07656	1.69173	1.85778	2.36444	0.0118013	1.22163	0.0392949	0.57018	-0.530886		0	-1	0	0	0	0	0	0	0	0	1	0	0	0	0	0	2	0	0	2	0	3	0	-2	0	-1	0
PF00886	Ribosomal_S16	Ribosomal protein S16	2	1	24	49	1	3	3	3	22	42	0.473684	0.789474	2.11111	3.8	0.636475	0.182901	-0.371621	-0.174644	-0.196977		0	0	0	-1	2	0	0	0	1	0	0	0	0	0	0	0	0	0	0	0	-1	2	5	0	0	-1	1
PF00887	ACBP	Acyl CoA binding protein	7	6	59	67	6	5	4	5	53	59	1.24654	0.925164	4.81333	5.40444	0.316759	0.0328389	0.24142	-0.0674254	0.308845		-2	0	1	4	0	-1	0	0	-1	1	1	-2	-3	1	-1	0	3	1	0	0	-4	3	3	-3	1	1	0
PF00888	Cullin	Cullin family	7	4	163	27	12	3	16	3	134	23	0.947368	1.3664	12.6667	2.19556	0.0380639	0.318889	-0.0729815	0.242394	-0.315376		1	-2	1	4	0	0	0	0	2	-1	2	0	0	-1	1	0	-1	0	1	4	5	11	13	4	6	4	8
PF00889	EF_TS	Elongation factor TS	1	4	49	52	2	4	5	1	42	47	0.503919	0.986842	3.96889	4.05333	1.06281	0.00076108	-0.519168	-0.00966513	-0.509503		0	-1	-1	1	0	0	0	0	0	0	-1	0	0	0	-1	0	0	0	0	3	-1	-1	4	-1	0	0	-1
PF00890	FAD_binding_2	FAD binding domain	6	11	151	76	5	11	15	6	128	68	0.41406	1.76031	12.0756	6.24889	4.51417	3.89897	-1.47346	1.31591	-2.78938		-1	-10	-9	17	-1	8	-1	2	0	-1	-2	-1	-2	0	-1	1	12	9	-5	50	-7	78	76	-3	23	8	20
PF00891	Methyltransf_2	O-methyltransferase domain	3	6	45	58	0	6	7	2	39	51	0	1.34062	3.88444	4.47556	4.24272	0.561872	-1.40429	0.343416	-1.74771		0	0	0	1	2	-2	0	0	-1	0	0	-1	-2	0	0	-1	2	0	-1	0	-2	9	4	-3	-1	0	0
PF00892	EamA	EamA-like transporter family	7	8	145	87	9	9	12	8	124	74	0.783669	1.29974	11.4844	6.92444	0.583693	0.673373	-0.351769	0.385231	-0.737		-4	-14	-6	31	4	4	0	0	-1	1	3	-1	-3	3	0	-2	9	-1	0	30	-11	47	70	-49	-1	10	5
PF00893	Multi_Drug_Res	Small Multidrug Resistance protein	1	5	11	45	1	5	2	3	8	41	1.18421	1.34569	0.844444	3.71556	0.0310377	0.480456	0.0654226	0.311388	-0.245966		0	-1	0	6	0	0	0	0	0	0	-1	0	0	-1	0	0	-1	-1	0	0	0	0	0	0	0	-1	0
PF00896	0	0	0	0	0	0	0	0	0	0	0	0	0	0	0	0	0	0	FALSE	FALSE	FALSE		0	0	0	0	0	0	0	0	0	0	0	0	0	0	0	0	0	0	0	0	0	0	0	0	0	0	0
PF00899	ThiF	ThiF family	6	8	172	29	13	2	15	2	142	31	0.980556	0.717703	13.2578	2.78667	0.00543605	0.241284	-0.0263063	-0.205317	0.17901		0	-3	1	4	0	-1	1	0	-1	1	-1	-1	-1	0	-1	0	5	2	-1	9	7	15	18	4	9	9	9
PF00900	Ribosomal_S4e	Ribosomal family S4e	1	1	28	31	3	1	1	0	23	28	1.48026	0.422932	2.02667	2.36444	0.505392	0.857272	0.321354	-0.45038	0.771734		0	-1	0	0	0	0	0	0	0	0	0	0	0	0	0	0	1	0	0	4	-1	-1	10	0	0	0	1
PF00901	Orbi_VP5	Orbivirus outer capsid protein VP5	0	0	0	2	0	0	0	1	0	1	0	0	0	0.168889	0	0.184466	FALSE	-0.175508	FALSE		0	0	0	0	0	0	0	0	0	0	0	0	0	0	0	0	0	0	0	0	0	0	0	0	0	0	0
PF00902	TatC	Sec-independent protein translocase protein (TatC)	1	2	10	19	0	2	1	4	10	13	0	1.39319	0.928889	1.43556	1.01456	0.240072	-0.50333	0.204708	-0.708038		0	0	0	0	0	0	0	0	1	-1	0	0	0	0	0	0	0	0	-1	0	0	0	1	0	0	0	0
PF00903	Glyoxalase	Glyoxalase/Bleomycin resistance protein/Dioxygenase superfamily	7	7	69	66	5	6	7	3	60	60	0.883739	1.12782	5.65778	5.32	0.0829956	0.0941786	-0.111664	0.119798	-0.231462		-1	-2	-1	4	2	2	1	-1	0	1	0	0	-1	1	-2	0	0	2	-1	0	-1	3	8	-1	-2	1	0
PF00905	Transpeptidase	Penicillin binding protein transpeptidase domain	0	7	5	25	0	5	0	5	5	21	0	2.27733	0.422222	2.19556	0.461165	3.85524	-0.303574	1.3046	-1.60817		0	-1	0	0	-1	0	0	0	0	0	-1	-1	-1	0	-1	0	-1	0	0	0	0	0	0	0	0	0	0
PF00908	dTDP_sugar_isom	dTDP-4-dehydrorhamnose 3,5-epimerase	0	0	6	34	0	4	0	2	6	27	0	1.63339	0.506667	2.44889	0.553398	1.06122	-0.340148	0.518646	-0.858794		0	0	0	0	0	0	0	0	0	0	0	0	0	0	0	0	0	0	0	0	-1	-1	-1	-1	1	-1	0
PF00909	Ammonium_transp	Ammonium Transporter Family	7	8	168	26	9	6	17	3	140	24	0.678847	2.63158	13.2578	2.28	1.48609	6.51994	-0.652037	1.97195	-2.62399		2	-7	0	16	1	5	-1	0	0	0	-2	-2	-2	-2	1	-3	35	2	-2	26	17	32	59	6	25	7	8
PF00910	RNA_helicase	RNA helicase	1	3	3	43	1	4	1	3	2	37	3.94737	1.18421	0.253333	3.37778	2.3495	0.124151	0.90197	0.139916	0.762053		0	0	0	0	0	-1	0	0	0	0	0	0	2	0	0	0	-1	0	-1	0	0	-1	-1	0	0	0	0
PF00912	Transgly	Transglycosylase	0	5	4	23	0	4	0	6	4	18	0	1.97368	0.337778	2.02667	0.368932	2.07133	-0.264731	0.823646	-1.08838		0	0	0	0	-1	0	0	0	0	0	-1	-1	0	0	-1	0	-1	0	0	0	0	0	0	0	0	0	0
PF00916	Sulfate_transp	Sulfate permease family	8	8	162	27	12	2	17	1	134	30	0.941094	0.764007	12.7511	2.61778	0.0479995	0.158353	-0.0827143	-0.160725	0.0780105		-1	-2	-2	3	3	1	0	1	1	-1	2	-1	0	0	-4	-1	12	1	-1	29	21	38	69	5	17	8	8
PF00917	MATH	MATH domain	5	6	37	48	2	5	5	5	35	42	0.592105	1.2598	3.37778	3.96889	0.611138	0.290016	-0.362151	0.228993	-0.591144		0	-1	-1	5	2	1	0	1	0	0	-1	0	-1	0	-2	0	0	6	-3	0	1	-1	1	-1	0	0	0
PF00919	UPF0004	Uncharacterized protein family UPF0004	4	3	63	62	3	8	7	6	56	46	0.56391	1.82186	5.32	4.39111	1.10043	3.20022	-0.531399	1.13295	-1.66435		0	-1	-1	3	0	1	0	0	0	0	-1	0	0	1	0	1	0	0	0	0	0	2	0	-1	1	0	1
PF00920	ILVD_EDD	Dehydratase family	5	0	40	35	1	3	1	0	41	28	0.281955	1.2688	3.54667	2.36444	1.99301	0.184941	-0.801269	0.17577	-0.977038		0	0	0	3	0	1	0	0	0	0	0	0	0	0	0	1	1	1	0	0	-2	1	4	-2	0	1	0
PF00922	Phosphoprotein	Vesiculovirus phosphoprotein	0	0	0	0	0	0	0	0	0	0	0	0	0	0	0	0	FALSE	FALSE	FALSE		0	0	0	0	0	0	0	0	0	0	0	0	0	0	0	0	0	0	0	0	0	0	0	0	0	0	0
PF00923	TAL_FSA	Transaldolase/Fructose-6-phosphate aldolase	4	3	46	43	2	6	7	3	41	35	0.493421	1.86981	4.05333	3.20889	1.13194	2.61871	-0.54157	0.976293	-1.51786		0	0	0	3	0	1	0	0	0	0	-2	0	-1	0	1	0	0	-1	1	0	-2	3	1	0	0	-1	0
PF00924	MS_channel	Mechanosensitive ion channel	7	7	69	77	6	6	5	9	62	65	1.06049	0.960171	5.65778	6.24889	0.0224391	0.010753	0.0550612	-0.0374365	0.0924977		-1	-2	-1	1	4	0	0	1	-1	0	0	-1	0	1	1	-2	1	-2	2	0	-4	3	2	-7	1	0	1
PF00925	GTP_cyclohydro2	GTP cyclohydrolase II	5	1	51	52	3	4	6	1	47	44	0.670308	1.05263	4.47556	3.8	0.528736	0.0114113	-0.330554	0.0386126	-0.369167		0	0	0	1	1	0	0	0	1	0	0	0	0	0	0	0	2	1	-1	2	-1	0	3	-2	0	0	0
PF00926	DHBP_synthase	3,4-dihydroxy-2-butanone 4-phosphate synthase	2	1	38	36	0	2	8	0	32	31	0	0.764007	3.37778	2.61778	3.68932	0.158353	-1.26152	-0.160725	-1.1008		0	-2	0	0	1	0	0	0	0	0	0	0	0	0	0	0	1	0	0	1	-1	0	0	-2	0	1	0
PF00927	Transglut_C	Transglutaminase family, C-terminal ig like domain	0	0	1	19	0	3	1	2	0	13	0	2.36842	0.0844444	1.26667	0.092233	2.55148	-0.118411	0.957853	-1.07626		0	0	0	0	0	0	0	0	0	0	0	0	0	0	0	0	0	0	0	0	0	0	0	0	0	0	0
PF00928	Adap_comp_sub	Adaptor complexes medium subunit family	5	3	67	61	4	6	4	4	61	50	0.728745	1.31579	5.48889	4.56	0.438773	0.492139	-0.29438	0.316076	-0.610455		1	0	-1	1	0	0	0	0	0	0	1	1	-1	0	0	0	-1	0	1	0	-4	3	6	-4	0	0	-1
PF00929	RNase_T	Exonuclease	7	7	173	29	15	1	17	2	140	31	1.13141	0.358852	13.2578	2.78667	0.248069	1.24779	0.208704	-0.578437	0.78714		-1	-3	1	3	2	-1	0	0	-1	0	-1	0	1	1	-1	0	4	1	-1	8	2	9	9	1	12	6	13
PF00930	DPPIV_N	Dipeptidyl peptidase IV (DPP IV) N-terminal region	1	2	40	47	3	5	5	2	30	41	1.01504	1.37699	2.95556	3.63111	0.000724703	0.55829	0.00942883	0.342036	-0.332607		0	0	0	0	0	0	0	0	0	0	0	0	-1	-1	0	0	0	0	1	1	-1	0	1	0	0	0	0
PF00931	NB-ARC	NB-ARC domain	6	4	36	54	5	7	4	4	32	42	1.64474	1.80206	3.04	3.88444	1.36489	2.69649	0.614944	0.997534	-0.382591		0	2	2	0	0	-1	0	0	-1	0	-1	0	-1	1	1	1	0	0	1	0	0	0	0	0	0	0	4
PF00932	LTD	Lamin Tail Domain	1	7	33	54	2	7	7	3	25	49	0.740132	1.59413	2.70222	4.39111	0.198241	1.67466	-0.183001	0.708551	-0.891551		-2	-1	0	0	0	0	-1	0	0	0	0	0	-1	4	-1	-1	-1	0	0	0	-1	-1	5	-1	0	3	0
PF00933	Glyco_hydro_3	Glycosyl hydrolase family 3 N terminal domain	4	6	121	19	8	5	11	2	98	18	0.869145	2.96053	9.20444	1.68889	0.171065	6.96183	-0.168023	2.07953	-2.24755		2	0	0	8	1	-1	0	0	0	0	-3	-1	-5	-1	0	0	13	0	-1	59	10	54	68	6	5	3	2
PF00935	Ribosomal_L44	Ribosomal protein L44	0	0	32	54	3	3	1	1	25	45	1.3664	0.772311	2.19556	3.88444	0.318889	0.218717	0.242394	-0.193807	0.436201		0	0	0	0	0	0	0	0	0	0	0	0	0	0	0	0	0	0	0	2	0	0	7	-1	0	0	0
PF00936	BMC	BMC domain	0	0	0	0	0	0	0	0	0	0	0	0	0	0	0	0	FALSE	FALSE	FALSE		0	0	0	0	0	0	0	0	0	0	0	0	0	0	0	0	0	0	0	0	0	0	0	0	0	0	0
PF00937	CoV_nucleocap	Coronavirus nucleocapsid	0	0	0	0	0	0	0	0	0	0	0	0	0	0	0	0	FALSE	FALSE	FALSE		0	0	0	0	0	0	0	0	0	0	0	0	0	0	0	0	0	0	0	0	0	0	0	0	0	0	0
PF00939	Na_sulph_symp	Sodium:sulfate symporter transmembrane region	6	3	58	60	3	10	2	5	58	43	0.592105	2.46711	5.06667	4.05333	0.916707	9.3799	-0.470645	2.65881	-3.12945		0	1	-2	0	0	2	0	1	0	0	2	1	0	-1	0	0	3	0	-1	1	0	0	4	-6	0	0	0
PF00940	RNA_pol	DNA-dependent RNA polymerase	2	1	40	36	3	2	4	3	32	30	0.986842	0.717703	3.04	2.78667	0.00057081	0.241284	-0.00835797	-0.205317	0.196959		0	0	0	0	0	0	0	0	0	-1	1	0	0	0	0	0	1	0	0	0	0	0	1	-1	0	0	0
PF00941	FAD_binding_5	FAD binding domain in molybdopterin dehydrogenase	2	2	44	60	2	4	1	4	39	51	0.592105	0.861244	3.37778	4.64444	0.611138	0.0970611	-0.362151	-0.121831	-0.240319		0	0	0	3	0	0	-1	0	0	0	0	-1	0	0	0	0	2	0	0	0	-3	3	2	-3	0	0	1
PF00942	CBM_3	Cellulose binding domain	0	0	0	6	0	0	0	1	0	5	0	0	0	0.506667	0	0.553398	FALSE	-0.340148	FALSE		0	0	0	0	0	0	0	0	0	0	0	0	0	0	0	0	0	0	0	0	0	0	0	0	0	0	0
PF00944	Peptidase_S3	Alphavirus core protein	0	0	0	0	0	0	0	0	0	0	0	0	0	0	0	0	FALSE	FALSE	FALSE		0	0	0	0	0	0	0	0	0	0	0	0	0	0	0	0	0	0	0	0	0	0	0	0	0	0	0
PF00949	Peptidase_S7	Peptidase S7, Flavivirus NS3 serine protease	0	0	0	3	0	0	0	0	0	3	0	0	0	0.253333	0	0.276699	FALSE	-0.222665	FALSE		0	0	0	0	0	0	0	0	0	0	0	0	0	0	0	0	0	0	0	0	0	0	0	0	0	0	0
PF00953	Glycos_transf_4	Glycosyl transferase family 4	1	2	16	55	3	4	2	3	11	46	2.73279	0.966702	1.09778	4.13778	3.53897	0.00497615	1.22226	-0.0251373	1.2474		0	-1	0	0	0	0	0	0	0	0	1	0	0	0	0	0	-1	0	0	0	-1	0	0	-1	0	0	0
PF00955	HCO3_cotransp	HCO3- transporter family	5	7	56	65	3	5	10	2	46	63	0.634398	0.910931	4.72889	5.48889	0.687161	0.0472497	-0.390265	-0.0820116	-0.308253		0	-4	0	6	3	0	0	2	0	0	-2	-1	0	-1	-1	-1	13	2	-2	1	-2	0	2	0	-1	4	-4
PF00956	NAP	Nucleosome assembly protein (NAP)	5	1	45	35	3	1	5	1	38	31	0.826193	0.370066	3.63111	2.70222	0.119092	1.16792	-0.136664	-0.553109	0.416444		0	2	1	-1	0	0	0	0	1	0	0	0	0	1	0	0	2	0	0	2	0	2	0	-4	0	0	0
PF00957	Synaptobrevin	Synaptobrevin	6	5	172	28	11	3	15	1	143	28	0.82445	1.22505	13.3422	2.44889	0.44642	0.134303	-0.297535	0.146295	-0.44383		1	-3	-1	5	0	0	1	0	0	0	1	-2	0	-1	0	1	-4	1	0	9	9	14	18	3	12	6	9
PF00958	GMP_synt_C	GMP synthase C terminal domain	2	1	27	38	0	3	2	0	27	33	0	1.07656	2.44889	2.78667	2.67476	0.017702	-0.991609	0.0485873	-1.0402		0	0	-1	1	0	0	0	0	0	0	0	0	0	0	0	0	1	0	0	1	-4	4	1	-5	0	-1	0
PF00959	Phage_lysozyme	Phage lysozyme	0	0	1	16	0	1	0	2	1	13	0	0.789474	0.0844444	1.26667	0.092233	0.0609669	-0.118411	-0.094218	-0.0241934		0	0	0	0	0	0	0	0	0	0	0	0	0	0	0	0	0	0	0	0	0	0	0	0	0	0	0
PF00961	LAGLIDADG_1	LAGLIDADG endonuclease	0	0	2	9	0	0	0	1	2	8	0	0	0.168889	0.76	0.184466	0.830097	-0.175508	-0.440998	0.26549		0	0	0	0	0	0	0	0	0	0	0	0	0	0	0	0	0	0	0	0	-1	1	-1	0	0	0	0
PF00962	A_deaminase	Adenosine/AMP deaminase	4	4	59	74	6	7	7	5	45	63	1.3664	1.21904	4.39111	5.74222	0.637777	0.298346	0.372105	0.232903	0.139202		0	-1	1	5	3	0	0	0	0	-1	-1	0	-2	0	0	0	9	0	0	1	-6	0	10	-6	0	0	2
PF00963	Cohesin	Cohesin domain	0	0	3	8	2	1	0	0	1	7	23.6842	1.69173	0.0844444	0.591111	44.7114	0.305407	10.6415	0.236188	10.4053		0	0	0	0	0	0	0	0	0	0	0	0	0	0	0	0	0	0	0	0	0	0	0	0	0	0	0
PF00970	FAD_binding_6	Oxidoreductase FAD-binding domain	5	7	167	31	11	4	16	2	137	30	0.851393	1.48026	12.92	2.70222	0.309725	0.673856	-0.238186	0.385408	-0.623594		-1	-1	0	5	2	-1	0	0	-1	0	-2	0	-3	1	0	0	10	1	-2	20	8	14	21	4	16	5	18
PF00975	Thioesterase	Thioesterase domain	2	6	58	56	3	5	7	4	45	50	0.683198	1.09649	4.39111	4.56	0.478944	0.0460123	-0.310779	0.0808417	-0.391621		0	-2	0	5	0	-1	0	0	0	0	-1	0	-1	0	-1	-1	10	0	0	2	4	0	16	-24	-1	-1	1
PF00977	His_biosynth	Histidine biosynthesis protein	6	1	46	56	4	2	6	3	38	48	1.07656	0.464396	3.71556	4.30667	0.0236027	1.34473	0.0565548	-0.608709	0.665264		0	-1	0	3	1	0	0	0	1	0	0	0	0	1	0	0	2	1	0	0	0	0	5	-1	0	-1	2
PF00982	Glyco_transf_20	Glycosyltransferase family 20	5	4	57	57	5	5	4	4	52	48	1.05733	1.13866	4.72889	4.39111	0.0168492	0.0914782	0.0473426	0.11787	-0.0705278		0	-1	-2	4	0	2	0	0	0	1	0	0	-2	1	0	0	0	1	-1	0	-3	1	2	-5	1	0	0
PF00984	UDPG_MGDP_dh	UDP-glucose/GDP-mannose dehydrogenase family, central domain	5	3	49	36	1	5	4	1	46	30	0.236842	1.91002	4.22222	2.61778	2.68102	2.33786	-0.993318	0.898725	-1.89204		0	1	-1	0	1	3	-1	0	0	0	0	1	-1	0	0	0	1	0	0	1	-1	0	3	-2	0	0	1
PF00986	DNA_gyraseB_C	DNA gyrase B subunit, carboxyl terminus	0	1	14	23	0	0	2	0	12	22	0	0	1.18222	1.85778	1.29126	2.02913	-0.592073	-0.811608	0.219535		0	0	0	0	0	0	0	0	0	0	0	0	0	0	0	0	-1	0	0	0	0	0	0	0	0	-1	0
PF00988	CPSase_sm_chain	Carbamoyl-phosphate synthase small chain, CPSase domain	1	0	30	51	1	3	2	2	27	41	0.408348	0.826193	2.44889	3.63111	0.933433	0.119092	-0.476289	-0.136664	-0.339625		0	0	0	0	0	0	0	0	0	0	0	0	0	0	0	0	2	0	0	0	-2	14	6	-1	0	0	0
PF00989	PAS	PAS fold	8	7	166	29	13	4	15	4	138	26	1.00619	1.57895	12.92	2.53333	0.000537164	0.917484	0.00810561	0.470908	-0.462803		1	0	-1	4	-1	4	1	0	-4	6	1	-2	-4	0	1	0	-2	-1	1	3	3	8	24	4	1	12	23
PF00990	GGDEF	Diguanylate cyclase, GGDEF domain	2	4	7	33	1	5	0	2	8	26	1.48026	2.11466	0.675556	2.36444	0.168464	3.16449	0.166546	1.12346	-0.956912		0	-1	0	3	0	-1	0	0	0	0	1	0	-1	0	0	0	-1	0	0	0	0	0	0	0	0	0	0
PF00991	0	0	0	0	0	0	0	0	0	0	0	0	0	0	0	0	0	0	FALSE	FALSE	FALSE		0	0	0	0	0	0	0	0	0	0	0	0	0	0	0	0	0	0	0	0	0	0	0	0	0	0	0
PF00994	MoCF_biosynth	Probable molybdopterin binding domain	3	4	48	66	4	7	5	6	39	55	1.07656	1.35893	3.71556	5.15111	0.0236027	0.718013	0.0565548	0.401432	-0.344877		-1	0	-2	0	0	4	0	0	0	0	0	-1	1	0	0	0	-1	1	0	0	-2	2	2	-2	0	1	0
PF00995	Sec1	Sec1 family	4	5	175	25	12	2	16	2	142	24	0.8994	0.910931	13.3422	2.19556	0.146527	0.0188999	-0.153739	-0.050291	-0.103448		-1	-1	0	3	0	2	0	0	0	0	7	0	-1	1	0	0	-1	0	-1	7	3	3	10	0	5	3	4
PF00996	GDI	GDP dissociation inhibitor	6	4	68	53	7	3	7	5	59	44	1.25598	0.725027	5.57333	4.13778	0.395386	0.339906	0.276149	-0.251902	0.528051		-1	-2	1	2	1	-1	0	0	0	1	0	0	1	0	0	0	-1	1	0	0	-1	0	5	0	-1	0	1
PF00999	Na_H_Exchanger	Sodium/hydrogen exchanger family	7	10	171	34	11	6	17	3	141	33	0.82445	1.97368	13.3422	3.04	0.44642	3.10699	-0.297535	1.10815	-1.40568		4	-2	-2	6	3	2	-2	2	-1	0	-4	0	-3	-4	-1	-2	4	2	-2	24	17	37	51	7	41	11	13
PF01000	RNA_pol_A_bac	RNA polymerase Rpb3/RpoA insert domain	6	2	39	46	2	1	5	1	36	43	0.577664	0.269139	3.46222	3.71556	0.671627	2.16331	-0.384592	-0.849736	0.465145		-1	0	0	2	0	0	0	0	2	-1	1	1	0	0	0	1	0	1	0	0	-1	0	2	-1	1	0	-1
PF01007	IRK	Inward rectifier potassium channel transmembrane domain	6	5	53	60	5	4	4	6	48	52	1.13866	0.816697	4.39111	4.89778	0.0914782	0.178681	0.11787	-0.172302	0.290172		-1	0	0	2	1	-1	2	0	-1	1	0	-1	0	1	-1	0	5	0	0	2	-4	0	0	-4	0	0	2
PF01008	IF-2B	Initiation factor 2 subunit family	6	3	53	58	4	6	7	2	44	51	0.928793	1.34062	4.30667	4.47556	0.0236921	0.561872	-0.0566683	0.343416	-0.400084		-1	0	1	1	1	0	0	0	0	1	1	0	-1	1	0	0	-2	0	0	0	-1	0	2	-1	0	0	0
PF01010	Proton_antipo_C	NADH-dehyrogenase subunit F, TMs, (complex I) C-terminus	0	0	0	0	0	0	0	0	0	0	0	0	0	0	0	0	FALSE	FALSE	FALSE		0	0	0	0	0	0	0	0	0	0	0	0	0	0	0	0	0	0	0	0	0	0	0	0	0	0	0
PF01011	PQQ	PQQ enzyme repeat	5	5	66	69	3	10	7	7	56	56	0.56391	1.8797	5.32	5.32	1.10043	4.44061	-0.531399	1.45477	-1.98617		0	0	1	2	0	-1	0	1	1	0	-1	-2	-1	-1	0	0	6	0	0	133	106	55	174	13	13	0	1
PF01012	ETF	Electron transfer flavoprotein domain	1	3	34	43	0	3	2	2	32	37	0	0.910931	2.87111	3.29333	3.13592	0.0283498	-1.11586	-0.0623372	-1.05352		0	-1	0	0	-1	0	0	0	0	0	0	0	0	0	0	0	0	1	-1	0	-1	5	6	-1	0	0	-1
PF01014	Uricase	Uricase	0	4	11	35	0	1	0	1	9	35	0	0.328947	0.76	3.04	0.830097	1.49149	-0.440998	-0.653676	0.212678		-1	0	0	0	0	0	-1	0	0	0	0	-1	0	0	0	0	-1	0	0	0	0	0	0	0	0	0	0
PF01015	Ribosomal_S3Ae	Ribosomal S3Ae family	4	0	46	38	4	3	4	2	38	30	1.12782	1.1102	3.54667	2.70222	0.0627857	0.0355598	0.0957466	0.0703627	0.0253839		0	0	0	1	1	0	0	0	0	0	2	0	0	0	0	0	3	0	0	3	-3	0	17	-5	0	0	0
PF01016	Ribosomal_L27	Ribosomal L27 protein	4	1	25	59	1	2	4	7	22	49	0.455466	0.422932	2.19556	4.72889	0.708646	1.71454	-0.398055	-0.72034	0.322285		0	0	0	0	0	0	0	0	1	0	1	1	0	0	0	0	0	2	-1	0	0	0	2	0	0	-1	0
PF01018	GTP1_OBG	GTP1/OBG	4	2	53	59	7	4	7	4	42	50	1.69173	0.877193	4.13778	4.56	2.13785	0.0746402	0.842533	-0.105298	0.947831		-1	0	0	0	0	0	0	0	1	0	1	0	0	0	0	1	1	-1	0	0	-2	0	0	-2	0	0	0
PF01019	G_glu_transpept	Gamma-glutamyltranspeptidase	4	4	50	53	6	3	5	2	40	50	1.57895	0.683198	3.8	4.39111	1.37623	0.478944	0.618443	-0.310779	0.929222		0	-1	1	2	1	0	0	1	0	0	0	-1	0	0	0	-1	-1	0	0	0	-1	0	2	-1	0	0	0
PF01020	Ribosomal_L40e	Ribosomal L40e family	0	3	32	58	2	6	1	3	28	49	0.816697	1.3664	2.44889	4.39111	0.0893403	0.637777	-0.116329	0.372105	-0.488434		-1	0	0	0	0	0	0	0	0	0	0	0	0	0	0	0	-1	0	-1	4	0	-2	4	-2	0	0	0
PF01025	GrpE	GrpE	5	3	49	63	2	5	4	3	46	53	0.473684	1.05733	4.22222	4.72889	1.27295	0.0168492	-0.586342	0.0473426	-0.633684		-2	0	0	2	0	0	0	0	1	0	0	2	-1	1	-1	0	3	0	0	0	-4	3	1	-4	0	0	-1
PF01026	TatD_DNase	TatD related DNase	5	4	64	59	6	5	5	4	53	50	1.22505	1.09649	4.89778	4.56	0.268606	0.0460123	0.21877	0.0808417	0.137928		-2	-1	0	3	2	0	0	0	0	0	-2	0	0	2	0	0	5	-1	1	0	-4	1	6	-3	0	-1	0
PF01027	Bax1-I	Inhibitor of apoptosis-promoting Bax1	6	5	60	53	3	5	3	4	57	46	0.592105	1.18421	5.06667	4.22222	0.916707	0.155188	-0.470645	0.158875	-0.62952		1	0	-2	2	0	3	0	0	0	1	-1	0	0	0	-1	-1	7	1	-1	7	3	-4	0	-8	-2	0	0
PF01028	Topoisom_I	Eukaryotic DNA topoisomerase I, catalytic core	1	2	32	14	1	3	2	0	28	11	0.394737	3.22967	2.53333	0.928889	1.01066	4.94605	-0.502042	1.58252	-2.08456		1	0	-1	0	0	0	0	0	0	0	0	0	-1	0	0	0	0	0	0	0	0	0	1	0	0	0	0
PF01029	NusB	NusB family	1	5	20	48	0	5	3	2	17	45	0	1.2598	1.68889	3.96889	1.84466	0.290016	-0.758439	0.228993	-0.987433		-1	0	-1	0	0	0	0	0	0	0	0	0	-1	0	-1	1	-1	0	0	0	0	0	0	0	0	0	0
PF01030	Recep_L_domain	Receptor L domain	0	0	18	42	0	7	0	2	17	31	0	2.51196	1.43556	2.78667	1.56796	6.84744	-0.676741	2.05174	-2.72848		0	0	0	0	0	0	0	0	0	0	0	0	0	0	0	0	0	0	0	0	-1	0	-1	0	0	0	-1
PF01031	Dynamin_M	Dynamin central region	5	3	50	62	5	5	4	5	44	51	1.23355	1.05733	4.05333	4.72889	0.239406	0.0168492	0.204373	0.0473426	0.157031		0	0	2	1	0	0	0	0	-2	2	2	0	-1	0	0	0	2	0	-1	2	-5	3	0	-5	0	-2	0
PF01033	Somatomedin_B	Somatomedin B domain	1	0	19	28	0	3	1	1	18	22	0	1.54462	1.60444	1.94222	1.75243	0.622598	-0.731488	0.366447	-1.09794		0	0	0	0	0	0	0	0	0	0	0	0	0	0	0	0	5	0	0	4	-5	0	2	-4	0	0	0
PF01034	Syndecan	Syndecan domain	0	0	6	26	0	3	0	2	6	19	0	1.69173	0.506667	1.77333	0.553398	0.91622	-0.340148	0.47048	-0.810628		0	0	0	0	0	0	0	0	0	0	0	0	0	0	0	0	0	0	0	0	0	0	0	0	0	0	-1
PF01035	DNA_binding_1	6-O-methylguanine DNA methyltransferase, DNA binding domain	1	2	17	56	2	3	1	4	14	49	1.57895	0.670308	1.26667	4.47556	0.458742	0.528736	0.302585	-0.330554	0.63314		0	-1	0	1	0	0	0	0	0	0	0	0	0	0	0	0	0	0	-1	0	-1	1	1	0	0	0	0
PF01036	Bac_rhodopsin	Bacteriorhodopsin-like protein	4	9	40	59	2	5	10	4	31	54	0.577664	1.02087	3.46222	4.89778	0.671627	0.00231334	-0.384592	0.016988	-0.40158		-1	0	-3	-1	1	15	-1	1	-1	0	-1	-2	0	0	-1	-1	7	0	0	1	-1	1	-1	-5	0	0	0
PF01037	AsnC_trans_reg	Lrp/AsnC ligand binding domain	0	0	3	19	0	2	0	4	3	11	0	1.57895	0.253333	1.26667	0.276699	0.458742	-0.222665	0.302585	-0.525251		0	0	0	0	0	0	0	0	0	0	0	0	0	0	0	0	0	0	0	0	0	0	0	0	0	0	0
PF01039	Carboxyl_trans	Carboxyl transferase domain	6	3	167	20	10	2	15	4	139	15	0.768968	1.24654	13.0044	1.60444	0.753904	0.105586	-0.414265	0.127712	-0.541977		1	-2	0	1	-1	0	0	0	-1	1	3	0	0	0	0	1	3	0	0	13	8	18	21	9	9	4	5
PF01040	UbiA	UbiA prenyltransferase family	7	5	66	74	4	8	9	5	59	63	0.696594	1.39319	5.74222	5.74222	0.574411	0.960288	-0.348226	0.4853	-0.833527		-1	-2	-3	4	1	2	0	0	0	0	0	-1	0	1	1	0	1	2	-1	0	-6	13	3	-8	0	2	-2
PF01041	DegT_DnrJ_EryC1	DegT/DnrJ/EryC1/StrS aminotransferase family	8	7	165	30	12	4	15	3	138	28	0.928793	1.52801	12.92	2.61778	0.0710763	0.788832	-0.102496	0.426602	-0.529098		3	2	-1	-2	0	2	3	0	-3	3	0	-2	-1	-3	1	0	10	1	-1	16	11	32	50	8	11	3	7
PF01042	Ribonuc_L-PSP	Endoribonuclease L-PSP	6	3	63	66	6	4	9	4	52	58	1.1648	0.764007	5.15111	5.23556	0.151546	0.316706	0.156728	-0.241395	0.398124		-1	0	0	2	2	0	0	2	0	0	1	-1	0	1	-1	0	1	0	0	0	-2	3	5	-4	0	-1	0
PF01043	SecA_PP_bind	SecA preprotein cross-linking domain	2	4	38	37	2	4	4	1	34	32	0.623269	1.43541	3.20889	2.78667	0.495148	0.571323	-0.317278	0.347045	-0.664322		0	0	0	0	0	0	0	0	0	-1	-1	0	-1	0	0	0	1	3	-1	1	-1	0	2	-1	0	0	0
PF01047	MarR	MarR family	0	1	6	29	0	3	0	7	6	19	0	1.3664	0.506667	2.19556	0.553398	0.318889	-0.340148	0.242394	-0.582542		0	0	0	0	0	-1	0	0	0	0	0	0	0	0	0	0	0	0	0	0	0	0	0	0	0	0	0
PF01048	PNP_UDP_1	Phosphorylase superfamily	3	3	54	38	4	2	6	1	45	36	0.928793	0.640114	4.30667	3.12444	0.0236921	0.439915	-0.0566683	-0.294852	0.238184		-1	0	0	1	1	0	0	0	0	0	3	0	-1	0	0	0	0	-1	0	0	0	0	3	-1	0	0	0
PF01049	Cadherin_C	Cadherin cytoplasmic region	0	0	0	0	0	0	0	0	0	0	0	0	0	0	0	0	FALSE	FALSE	FALSE		0	0	0	0	0	0	0	0	0	0	0	0	0	0	0	0	0	0	0	0	0	0	0	0	0	0	0
PF01050	MannoseP_isomer	Mannose-6-phosphate isomerase	0	0	1	14	0	2	1	4	0	7	0	2.15311	0.0844444	0.928889	0.092233	1.33015	-0.118411	0.604188	-0.722599		0	0	0	0	0	0	0	0	0	0	0	0	0	0	0	0	0	0	0	0	0	0	0	0	0	0	0
PF01051	Rep_3	Initiator Replication protein	0	0	0	0	0	0	0	0	0	0	0	0	0	0	0	0	FALSE	FALSE	FALSE		0	0	0	0	0	0	0	0	0	0	0	0	0	0	0	0	0	0	0	0	0	0	0	0	0	0	0
PF01052	FliMN_C	Type III flagellar switch regulator (C-ring) FliN C-term	0	0	0	0	0	0	0	0	0	0	0	0	0	0	0	0	FALSE	FALSE	FALSE		0	0	0	0	0	0	0	0	0	0	0	0	0	0	0	0	0	0	0	0	0	0	0	0	0	0	0
PF01053	Cys_Met_Meta_PP	Cys/Met metabolism PLP-dependent enzyme	9	9	170	31	13	3	15	2	142	33	0.980556	1.01504	13.2578	2.95556	0.00543605	0.000724703	-0.0263063	0.00942883	-0.0357351		2	-1	-3	3	2	4	2	-1	-1	2	2	-1	0	-2	-1	-1	1	1	-2	14	9	16	42	7	9	7	6
PF01054	MMTV_SAg	Mouse mammary tumour virus superantigen	0	0	0	0	0	0	0	0	0	0	0	0	0	0	0	0	FALSE	FALSE	FALSE		0	0	0	0	0	0	0	0	0	0	0	0	0	0	0	0	0	0	0	0	0	0	0	0	0	0	0
PF01055	Glyco_hydro_31	Glycosyl hydrolases family 31	5	7	63	61	2	12	6	4	57	49	0.37594	2.68123	5.32	4.47556	2.25657	13.5858	-0.875991	3.64224	-4.51824		1	0	-2	1	1	1	0	0	-1	0	3	0	-4	-1	-1	-1	0	-1	0	0	-6	2	9	-10	1	0	0
PF01056	Myc_N	Myc amino-terminal region	0	0	0	9	0	1	0	1	0	7	0	1.48026	0	0.675556	0	0.168464	FALSE	0.166546	FALSE		0	0	0	0	0	0	0	0	0	0	0	0	0	0	0	0	0	0	0	0	0	0	0	0	0	0	0
PF01058	Oxidored_q6	NADH ubiquinone oxidoreductase, 20 Kd subunit	1	2	13	27	0	2	1	2	13	23	0	0.947368	1.18222	2.11111	1.29126	0.00634398	-0.592073	-0.0284847	-0.563589		0	0	0	-1	0	0	0	0	0	0	0	0	0	0	0	1	-1	0	0	0	0	0	1	0	0	0	0
PF01061	ABC2_membrane	ABC-2 type transporter	7	10	177	35	13	4	16	2	147	38	0.944462	1.18421	13.7644	3.37778	0.0460574	0.124151	-0.0808845	0.139916	-0.220801		-1	-2	-6	5	4	10	1	-1	-1	3	0	-3	-3	1	1	-5	-1	0	-1	25	19	27	41	5	23	21	37
PF01062	Bestrophin	Bestrophin, RFP-TM, chloride channel	7	11	167	42	12	6	15	3	139	43	0.922761	1.54462	13.0044	3.88444	0.0841762	1.2452	-0.112543	0.57762	-0.690163		-3	-6	-2	15	8	2	2	-2	-2	0	-11	-3	-3	3	-1	-3	40	5	-5	64	50	87	76	8	93	12	11
PF01063	Aminotran_4	Amino-transferase class IV	6	7	63	67	5	9	4	4	59	56	0.93985	1.77632	5.32	5.06667	0.0208818	3.2955	-0.053007	1.1582	-1.21121		-1	-1	-1	2	0	1	0	0	0	0	-2	-1	-1	1	-1	1	1	1	0	0	-2	0	8	-5	0	0	0
PF01066	CDP-OH_P_transf	CDP-alcohol phosphatidyltransferase	5	5	69	63	8	6	5	5	57	54	1.52801	1.20428	5.23556	4.98222	1.57766	0.225173	0.679651	0.19714	0.482511		-1	-1	-1	3	0	2	0	0	0	0	-1	1	0	0	-1	0	2	0	1	0	0	2	1	-4	0	-2	2
PF01067	Calpain_III	Calpain large subunit, domain III	5	6	41	58	5	5	2	6	35	48	1.60028	1.09649	3.12444	4.56	1.21635	0.0460123	0.568512	0.0808417	0.48767		-1	1	0	0	-1	1	0	0	-1	0	2	0	-2	3	-1	0	1	-1	0	0	-3	0	5	-3	1	0	1
PF01068	DNA_ligase_A_M	ATP dependent DNA ligase domain	5	8	64	75	1	8	7	5	59	66	0.179426	1.33432	5.57333	5.99556	4.09325	0.725164	-1.36598	0.404002	-1.76998		-1	-1	0	4	-1	1	0	0	-1	0	-1	-1	-2	0	1	1	1	0	-1	1	-5	0	1	-6	0	0	1
PF01070	FMN_dh	FMN-dependent dehydrogenase	6	4	71	68	5	9	6	6	62	54	0.870743	1.77632	5.74222	5.06667	0.104128	3.2955	-0.12672	1.1582	-1.28492		3	0	-1	-1	0	0	0	0	-1	0	4	1	1	-2	0	0	4	1	0	0	-5	5	6	-3	1	0	2
PF01071	GARS_A	Phosphoribosylglycinamide synthetase, ATP-grasp (A) domain	5	6	49	63	0	10	3	2	49	52	0	2.19298	4.39111	4.56	4.79612	6.9877	-1.54479	2.08581	-3.6306		-1	-1	0	5	1	1	0	0	0	0	-3	0	-2	0	-1	0	1	-1	1	0	-5	5	6	-6	1	1	0
PF01073	3Beta_HSD	3-beta hydroxysteroid dehydrogenase/isomerase family	8	9	235	0	16	2	21	0	196	7	0.873151	3.38346	18.3244	0.591111	0.320023	3.59408	-0.242912	1.23668	-1.47959		1	-6	-5	16	2	6	-2	0	3	-2	1	3	-6	0	-3	-1	-1	2	-2	37	26	52	75	8	22	13	13
PF01074	Glyco_hydro_38N	Glycosyl hydrolases family 38 N-terminal domain	3	5	45	65	3	5	6	7	36	56	0.845865	0.93985	3.54667	5.32	0.0914698	0.0208818	-0.117864	-0.053007	-0.0648575		0	0	-1	1	0	0	-1	1	0	0	-1	-1	0	0	0	0	0	-1	1	0	-1	0	1	-1	0	0	3
PF01077	NIR_SIR	Nitrite and sulphite reductase 4Fe-4S domain	2	4	51	45	0	7	4	6	47	33	0	2.12551	4.30667	3.29333	4.70388	4.49359	-1.52151	1.46824	-2.98975		0	-1	-1	2	0	0	0	0	0	0	-2	0	0	-1	0	0	3	0	0	0	0	21	5	-1	0	0	1
PF01078	Mg_chelatase	Magnesium chelatase, subunit ChlI	10	6	174	30	15	1	16	3	144	30	1.1102	0.358852	13.5111	2.78667	0.177799	1.24779	0.17181	-0.578437	0.750246		-1	0	-2	-1	0	1	-1	1	-1	1	0	2	2	1	1	1	1	-2	2	20	9	24	37	8	10	7	8
PF01079	Hint	Hint module	5	4	97	21	4	5	8	3	85	15	0.509338	3.28947	7.85333	1.52	2.05724	8.53117	-0.819633	2.45703	-3.27666		1	0	-1	5	0	3	0	0	0	0	-1	0	-2	0	0	0	4	1	-1	1	2	5	6	1	1	7	11
PF01080	Presenilin	Presenilin	0	4	30	43	2	5	3	2	23	40	0.910931	1.40977	2.19556	3.54667	0.0188999	0.644147	-0.050291	0.374468	-0.424759		0	0	-1	0	0	0	0	0	0	0	-1	0	0	-1	0	0	-1	0	0	0	0	0	1	0	0	0	1
PF01081	Aldolase	KDPG and KHG aldolase	4	1	31	43	1	2	0	3	33	35	0.358852	0.623269	2.78667	3.20889	1.24779	0.495148	-0.578437	-0.317278	-0.261159		1	-2	0	2	0	1	0	0	0	0	0	0	0	0	0	0	3	0	0	1	-4	2	3	-7	0	0	-1
PF01082	Cu2_monooxygen	Copper type II ascorbate-dependent monooxygenase, N-terminal domain	6	3	48	64	1	7	7	6	46	49	0.223436	1.50718	4.47556	4.64444	2.9429	1.29142	-1.06421	0.592124	-1.65634		0	0	0	0	2	0	0	2	-1	1	-1	0	2	0	0	0	2	2	-1	1	0	-1	1	-2	0	0	-1
PF01083	Cutinase	Cutinase	0	0	0	29	0	2	0	5	0	22	0	0.877193	0	2.28	0	0.0373201	FALSE	-0.0722116	FALSE		0	0	0	0	0	0	0	0	0	0	0	0	0	0	0	0	0	0	0	0	0	0	0	0	0	-1	0
PF01084	Ribosomal_S18	Ribosomal protein S18	3	1	30	38	2	2	1	0	29	34	0.789474	0.696594	2.53333	2.87111	0.121934	0.287205	-0.138498	-0.227666	0.0891684		0	0	0	0	0	0	0	0	1	-1	0	0	0	0	0	1	1	0	0	1	0	0	1	-1	0	-1	0
PF01086	Clathrin_lg_ch	Clathrin light chain	3	2	34	22	1	1	3	0	30	21	0.358852	0.56391	2.78667	1.77333	1.24779	0.36681	-0.578437	-0.263804	-0.314632		-1	0	0	1	0	0	0	0	-1	0	0	0	0	1	0	0	0	1	0	0	0	1	2	-2	0	0	0
PF01087	GalP_UDP_transf	Galactose-1-phosphate uridyl transferase, N-terminal domain	0	6	10	29	0	8	0	5	9	21	0	3.64372	0.76	2.19556	0.830097	16.4047	-0.440998	4.29108	-4.73208		0	0	-1	-1	0	0	0	0	0	0	-1	0	-1	-1	0	0	-1	0	0	0	-1	0	0	-1	0	0	0
PF01088	Peptidase_C12	Ubiquitin carboxyl-terminal hydrolase, family 1	4	2	52	45	5	4	4	4	43	35	1.2598	1.21457	3.96889	3.29333	0.290016	0.16421	0.228993	0.164113	0.0648806		0	-3	0	1	0	0	0	0	0	0	-1	0	1	0	0	1	0	1	0	0	-2	3	2	-2	0	0	0
PF01089	0	0	0	0	0	0	0	0	0	0	0	0	0	0	0	0	0	0	FALSE	FALSE	FALSE		0	0	0	0	0	0	0	0	0	0	0	0	0	0	0	0	0	0	0	0	0	0	0	0	0	0	0
PF01090	Ribosomal_S19e	Ribosomal protein S19e	2	2	35	41	2	2	2	2	31	36	0.717703	0.623269	2.78667	3.20889	0.241284	0.495148	-0.205317	-0.317278	0.111961		0	-1	0	0	0	0	0	0	-1	0	0	0	0	1	0	0	1	0	0	6	-2	-1	13	-1	-1	0	0
PF01092	Ribosomal_S6e	Ribosomal protein S6e	3	1	30	32	5	1	2	1	24	29	2.27733	0.394737	2.19556	2.53333	3.85524	1.01066	1.3046	-0.502042	1.80664		0	0	0	0	1	0	0	0	0	0	1	0	0	0	0	0	1	-1	0	3	-4	1	9	-6	0	0	0
PF01094	ANF_receptor	Receptor family ligand binding region	5	8	147	18	7	5	15	0	122	19	0.605071	3.11634	11.5689	1.60444	1.96201	7.70099	-0.792371	2.25813	-3.05051		3	-2	-1	20	2	4	0	0	0	-1	-1	0	-2	-2	-1	0	15	0	-1	2	0	6	22	1	52	9	18
PF01096	TFIIS_C	Transcription factor S-II (TFIIS)	2	7	48	59	4	5	4	4	41	53	1.05263	1.03878	3.8	4.81333	0.0114113	0.00784846	0.0386126	0.0317943	0.00681834		0	-2	-1	1	0	0	-1	0	-1	0	-1	1	0	0	0	0	-2	-1	0	0	-3	0	2	-2	-1	0	-1
PF01103	Omp85	Omp85 superfamily domain	0	3	38	47	2	5	2	3	32	40	0.696594	1.37699	2.87111	3.63111	0.287205	0.55829	-0.227666	0.342036	-0.569702		0	0	-1	-2	0	0	0	0	0	0	0	0	0	0	0	0	0	-1	0	1	-1	0	2	-2	-1	0	0
PF01104	Bunya_NS-S	Bunyavirus non-structural protein NS-s	0	0	0	0	0	0	0	0	0	0	0	0	0	0	0	0	FALSE	FALSE	FALSE		0	0	0	0	0	0	0	0	0	0	0	0	0	0	0	0	0	0	0	0	0	0	0	0	0	0	0
PF01105	EMP24_GP25L	emp24/gp25L/p24 family/GOLD	3	0	46	61	2	4	5	6	39	46	0.538278	0.910931	3.71556	4.39111	0.861714	0.0377998	-0.451906	-0.0727088	-0.379197		0	0	0	0	1	0	0	0	0	0	0	1	0	0	0	0	0	1	0	0	0	1	11	-1	0	-1	0
PF01106	NifU	NifU-like domain	3	4	49	52	4	4	7	5	39	43	1.02975	0.986842	3.88444	4.05333	0.00372714	0.00076108	0.0216738	-0.00966513	0.0313389		0	-1	0	3	0	0	0	0	0	-1	0	0	0	1	-1	0	1	-1	0	0	-2	1	2	-3	0	0	0
PF01108	Tissue_fac	Tissue factor	0	0	0	6	0	0	0	0	0	6	0	0	0	0.506667	0	0.553398	FALSE	-0.340148	FALSE		0	0	0	0	0	0	0	0	0	0	0	0	0	0	0	0	0	0	0	0	0	0	0	0	0	0	0
PF01111	CKS	Cyclin-dependent kinase regulatory subunit	4	1	21	54	3	1	0	3	19	49	1.86981	0.227733	1.60444	4.39111	1.30935	2.85542	0.597718	-1.04064	1.63836		0	0	0	0	0	1	0	0	1	0	1	0	0	0	-1	0	1	0	0	0	-1	0	0	-4	-1	0	0
PF01112	Asparaginase_2	Asparaginase	2	4	17	33	2	4	2	2	13	30	1.57895	1.48026	1.26667	2.70222	0.458742	0.673856	0.302585	0.385408	-0.0828225		0	0	0	0	0	0	0	0	0	0	2	0	-1	-1	0	0	-1	1	-1	0	0	1	1	-1	0	0	0
PF01113	DapB_N	Dihydrodipicolinate reductase, N-terminus	3	2	30	43	1	3	2	2	30	36	0.370066	0.934903	2.70222	3.20889	1.16792	0.0147527	-0.553109	-0.0441553	-0.508953		0	1	-1	0	0	1	0	0	1	0	0	0	-1	0	0	0	0	0	0	1	0	0	1	0	0	0	0
PF01115	F_actin_cap_B	F-actin capping protein, beta subunit	3	3	21	27	0	3	2	1	22	23	0	1.48026	2.02667	2.02667	2.21359	0.505392	-0.863915	0.321354	-1.18527		0	-1	0	1	1	0	0	0	0	0	0	0	-1	0	0	0	0	1	-1	0	0	0	1	0	0	0	-1
PF01116	F_bP_aldolase	Fructose-bisphosphate aldolase class-II	2	3	153	14	10	2	14	0	126	14	0.845865	1.69173	11.8222	1.18222	0.304899	0.610813	-0.235953	0.362028	-0.597982		0	0	0	3	0	0	0	0	0	0	-2	0	-1	0	-1	0	3	0	0	21	16	26	22	14	7	5	3
PF01117	Aerolysin	Aerolysin toxin	0	0	1	5	0	1	0	0	1	4	0	2.96053	0.0844444	0.337778	0.092233	1.39237	-0.118411	0.623412	-0.741824		0	0	0	0	0	0	0	0	0	0	0	0	0	0	0	0	0	0	0	0	0	0	0	0	0	0	0
PF01118	Semialdhyde_dh	Semialdehyde dehydrogenase, NAD binding domain	2	6	61	52	4	6	5	3	52	44	0.831025	1.51176	4.81333	3.96889	0.149207	1.12358	-0.15534	0.538877	-0.694217		0	-2	0	1	0	0	0	0	0	0	-1	-1	0	-1	0	-1	0	2	-1	0	-3	19	2	-7	0	-2	0
PF01119	DNA_mis_repair	DNA mismatch repair protein, C-terminal domain	2	3	45	67	6	5	4	6	37	56	1.73299	0.955008	3.46222	5.23556	2.00809	0.0114964	0.805591	-0.0387623	0.844354		1	0	-1	-1	0	0	0	0	0	-1	0	0	0	0	0	0	1	0	0	0	-2	0	0	-2	0	0	1
PF01120	Alpha_L_fucos	Alpha-L-fucosidase	2	3	14	27	2	5	1	3	12	20	1.82186	2.57437	1.09778	1.94222	0.800055	5.17289	0.430536	1.63937	-1.20883		0	0	1	0	0	0	0	0	0	0	-1	0	0	-1	1	-2	0	0	0	3	-1	-1	0	-1	0	0	0
PF01121	CoaE	Dephospho-CoA kinase	3	7	49	58	5	5	4	6	39	51	1.37699	1.03878	3.63111	4.81333	0.55829	0.00784846	0.342036	0.0317943	0.310242		0	-1	-1	2	0	0	0	0	-1	0	-1	-1	0	1	0	1	-1	-1	0	1	0	1	0	-2	0	0	0
PF01124	MAPEG	MAPEG family	7	6	65	64	6	5	9	5	53	56	1.14601	0.970664	5.23556	5.15111	0.120927	0.00480821	0.13785	-0.0246978	0.162548		2	-1	0	4	0	1	0	0	0	1	1	-1	-1	-1	0	-1	3	-1	2	0	-1	2	4	-5	0	0	-1
PF01125	G10	G10 protein	0	2	13	47	0	2	2	3	11	41	0	0.538278	1.09778	3.71556	1.19903	0.861714	-0.563018	-0.451906	-0.111111		0	-1	0	0	0	0	0	0	0	0	0	0	0	0	0	0	0	-1	0	1	0	0	0	0	0	-1	0
PF01126	Heme_oxygenase	Heme oxygenase	6	4	56	62	3	6	10	1	47	56	0.623269	1.24654	4.81333	4.81333	0.742722	0.316759	-0.410285	0.24142	-0.651704		0	0	0	2	2	1	0	0	-1	0	1	-1	-1	0	1	-1	2	0	0	0	0	1	1	-1	0	0	1
PF01127	Sdh_cyt	Succinate dehydrogenase/Fumarate reductase transmembrane subunit	3	2	14	47	1	2	0	4	15	41	0.789474	0.526316	1.26667	3.8	0.0609669	0.927632	-0.094218	-0.474335	0.380116		-1	0	0	0	0	0	0	0	1	0	1	0	0	0	0	0	-1	1	0	0	0	0	3	0	0	0	0
PF01128	IspD	2-C-methyl-D-erythritol 4-phosphate cytidylyltransferase	4	1	20	32	2	3	3	1	19	27	1.07656	1.2688	1.85778	2.36444	0.0118013	0.184941	0.0392949	0.17577	-0.136475		0	0	-1	0	0	1	0	1	0	0	0	0	1	0	1	0	0	0	0	0	-1	4	0	-1	0	0	-1
PF01129	ART	NAD:arginine ADP-ribosyltransferase	3	1	40	53	1	6	4	7	35	37	0.303644	1.61483	3.29333	3.71556	1.74026	1.5173	-0.727912	0.661488	-1.3894		0	12	0	0	0	2	0	0	0	0	0	0	-10	0	0	0	6	0	0	0	-5	10	2	-7	4	0	4
PF01130	CD36	CD36 family	3	2	23	31	2	1	2	5	19	27	1.12782	0.370066	1.77333	2.70222	0.0313929	1.16792	0.0658215	-0.553109	0.61893		0	0	0	0	0	0	0	0	-1	4	0	1	0	1	0	0	-2	0	0	1	-1	0	1	0	0	0	0
PF01131	Topoisom_bac	DNA topoisomerase	4	3	74	75	2	9	7	6	63	58	0.338346	1.6653	5.91111	5.40444	2.81926	2.58336	-1.03087	0.966609	-1.99748		0	1	0	0	-1	1	0	0	0	0	-2	0	0	-1	0	1	7	0	0	0	-5	4	3	-2	1	0	1
PF01132	EFP	Elongation factor P (EF-P) OB domain	3	2	29	37	4	4	5	1	22	31	1.75439	1.48026	2.28	2.70222	1.40055	0.673856	0.625928	0.385408	0.24052		0	0	-1	0	0	1	0	0	0	0	1	-1	0	0	0	1	0	0	0	0	0	0	0	0	0	0	-1
PF01133	ER	Enhancer of rudimentary	1	1	10	31	1	2	0	3	9	24	1.31579	0.877193	0.76	2.28	0.0820232	0.0373201	0.110937	-0.0722116	0.183149		0	0	0	1	0	0	0	0	0	0	0	-1	0	0	0	0	0	0	0	0	-1	0	1	0	0	0	0
PF01134	GIDA	Glucose inhibited division protein A	10	7	70	65	2	9	6	5	69	52	0.315789	1.86981	6.33333	4.81333	3.23064	3.92806	-1.14103	1.32343	-2.46445		1	-2	-3	2	0	1	-1	1	1	-1	-1	1	1	-2	0	1	2	3	-2	0	-2	4	6	-1	0	0	0
PF01135	PCMT	Protein-L-isoaspartate(D-aspartate) O-methyltransferase (PCMT)	7	9	64	67	1	7	4	5	62	61	0.179426	1.25598	5.57333	5.57333	4.09325	0.395386	-1.36598	0.276149	-1.64213		-1	3	-2	-2	-1	3	-1	1	-1	0	-2	3	0	2	-2	3	5	0	-1	0	-2	4	1	-10	-1	-1	4
PF01136	Peptidase_U32	Peptidase family U32	2	3	35	62	3	6	3	5	31	52	1.04489	1.24654	2.87111	4.81333	0.00627279	0.316759	0.0283194	0.24142	-0.2131		0	-1	0	1	0	0	0	0	-1	0	-1	0	0	1	0	0	0	0	0	0	-1	0	1	0	0	0	0
PF01137	RTC	RNA 3'-terminal phosphate cyclase	5	4	52	59	4	4	6	2	44	55	0.947368	0.831025	4.22222	4.81333	0.012688	0.149207	-0.0408082	-0.15534	0.114532		-1	-1	2	2	1	-1	0	0	0	0	1	-1	0	0	0	0	1	0	0	1	-3	0	0	-2	0	0	1
PF01138	RNase_PH	3' exoribonuclease family, domain 1	7	5	75	79	7	4	11	3	60	73	1.16753	0.623269	5.99556	6.41778	0.182288	0.990296	0.174305	-0.495298	0.669603		-4	-2	0	2	1	0	0	0	1	0	1	0	-1	2	1	0	-2	-1	1	0	0	2	3	-2	0	-1	0
PF01139	RtcB	tRNA-splicing ligase RtcB	2	3	36	46	4	7	3	4	29	35	1.48026	2.12551	2.70222	3.29333	0.673856	4.49359	0.385408	1.46824	-1.08283		0	0	3	0	0	-1	0	0	0	0	0	0	-1	0	0	0	2	-1	0	1	-1	0	2	-2	0	0	0
PF01142	TruD	tRNA pseudouridine synthase D (TruD)	4	4	40	52	4	5	5	2	32	47	1.28023	1.20838	3.12444	4.13778	0.265595	0.194578	0.217311	0.181027	0.0362842		-1	1	-2	0	0	6	0	0	0	0	-1	0	0	1	-1	0	3	0	0	1	-2	4	0	-3	0	0	1
PF01144	CoA_trans	Coenzyme A transferase	5	2	29	35	2	5	1	4	31	28	0.740132	1.85033	2.70222	2.70222	0.198241	2.10781	-0.183001	0.834016	-1.01702		0	0	0	1	-1	0	0	0	1	0	0	0	-1	0	1	1	0	0	1	0	-2	1	4	-1	0	0	0
PF01145	Band_7	SPFH domain / Band 7 family	7	8	235	0	16	3	21	0	195	5	0.877193	7.10526	18.24	0.422222	0.298561	16.6149	-0.233003	4.33923	-4.57224		0	-1	-2	7	2	2	-1	2	0	0	-1	-2	-2	1	-1	-2	11	1	0	46	47	55	98	20	28	7	7
PF01146	Caveolin	Caveolin	0	0	1	4	0	0	0	0	0	3	0	0	0	0.253333	0	0.276699	0	-0.222665	0.222665		0	0	0	0	0	0	0	0	0	0	0	0	0	0	0	0	0	0	0	0	0	0	-1	0	0	0	0
PF01148	CTP_transf_1	Cytidylyltransferase family	4	2	66	71	5	6	6	6	55	57	0.970664	1.12782	5.15111	5.32	0.00480821	0.0941786	-0.0246978	0.119798	-0.144496		0	0	-1	1	1	0	0	0	0	0	0	0	0	0	-1	0	2	1	0	0	-2	1	4	-3	1	-1	1
PF01149	Fapy_DNA_glyco	Formamidopyrimidine-DNA glycosylase N-terminal domain	3	5	35	54	1	4	7	5	30	45	0.320057	0.947368	3.12444	4.22222	1.57391	0.012688	-0.678526	-0.0408082	-0.637718		0	-1	0	4	0	1	0	0	0	0	-1	-1	0	0	-1	0	0	1	-1	0	0	0	0	-1	0	0	0
PF01150	GDA1_CD39	GDA1/CD39 (nucleoside phosphatase) family	6	3	65	65	7	6	9	5	52	53	1.35893	1.22505	5.15111	4.89778	0.718013	0.268606	0.401432	0.21877	0.182662		-1	-2	0	5	0	0	0	0	0	0	1	0	-1	1	0	1	5	1	0	0	-6	5	2	-4	-2	0	0
PF01151	ELO	GNS1/SUR4 family	8	6	75	70	10	4	8	6	60	62	1.74149	0.696594	5.74222	5.74222	3.40797	0.574411	1.18787	-0.348226	1.5361		-1	-3	1	5	1	0	0	-1	-1	1	3	-1	1	1	1	0	0	0	-1	0	-5	6	12	-3	1	1	0
PF01152	Bac_globin	Bacterial-like globin	2	5	42	62	4	5	2	6	35	53	1.28023	1.00357	3.12444	4.98222	0.265595	6.87906e-05	0.217311	0.00288353	0.214427		0	-1	0	0	0	-1	0	0	0	0	1	0	-1	-1	3	0	0	-1	0	0	0	0	1	-1	1	-2	1
PF01154	HMG_CoA_synt_N	Hydroxymethylglutaryl-coenzyme A synthase N terminal	4	3	31	40	1	2	1	3	32	36	0.358852	0.607287	2.78667	3.29333	1.24779	0.552269	-0.578437	-0.339712	-0.238725		15	0	0	2	0	0	0	0	0	0	-1	0	0	-5	1	0	2	-1	0	2	0	0	0	-2	1	0	0
PF01155	HypA	Hydrogenase/urease nickel incorporation, metallochaperone, hypA	0	0	0	8	0	0	0	0	0	8	0	0	0	0.675556	0	0.737864	FALSE	-0.40855	FALSE		0	0	0	0	0	0	0	0	0	0	0	0	0	0	0	0	0	0	0	0	0	0	0	0	0	0	0
PF01156	IU_nuc_hydro	Inosine-uridine preferring nucleoside hydrolase	7	6	62	81	7	5	6	4	53	74	1.405	0.759109	4.98222	6.58667	0.883916	0.415159	0.459506	-0.284529	0.744036		-1	-6	2	5	0	-1	0	0	0	0	-1	0	2	1	-1	1	7	2	-1	0	-5	2	5	-5	0	1	-1
PF01157	Ribosomal_L21e	Ribosomal protein L21e	3	0	36	43	4	1	2	2	32	36	1.39319	0.311634	2.87111	3.20889	0.480144	1.65685	0.311263	-0.70327	1.01453		1	0	0	0	0	0	0	0	0	1	0	0	0	0	0	0	1	0	0	3	1	-2	11	-1	0	0	-1
PF01158	Ribosomal_L36e	Ribosomal protein L36e	1	3	36	36	3	1	1	1	30	32	1.14601	0.358852	2.61778	2.78667	0.0604636	1.24779	0.0937918	-0.578437	0.672228		0	-1	0	0	2	0	0	-1	-1	0	0	0	0	0	0	0	0	0	0	0	0	0	10	0	0	0	0
PF01159	Ribosomal_L6e	Ribosomal protein L6e	3	1	31	36	2	1	1	3	27	30	0.845865	0.358852	2.36444	2.78667	0.0609799	1.24779	-0.094229	-0.578437	0.484208		0	0	1	-1	0	0	0	0	0	0	0	0	0	0	0	0	1	1	0	0	0	0	9	-4	0	0	2
PF01160	Opiods_neuropep	Vertebrate endogenous opioids neuropeptide	0	0	0	0	0	0	0	0	0	0	0	0	0	0	0	0	FALSE	FALSE	FALSE		0	0	0	0	0	0	0	0	0	0	0	0	0	0	0	0	0	0	0	0	0	0	0	0	0	0	0
PF01161	PBP	Phosphatidylethanolamine-binding protein	5	4	35	44	3	2	2	5	32	38	1.04489	0.550796	2.87111	3.63111	0.00627279	0.797014	0.0283194	-0.429472	0.457791		-1	0	0	1	0	0	1	-1	1	0	2	-1	1	0	0	0	-1	0	0	0	0	1	3	0	1	0	0
PF01162	0	0	0	0	0	0	0	0	0	0	0	0	0	0	0	0	0	0	FALSE	FALSE	FALSE		0	0	0	0	0	0	0	0	0	0	0	0	0	0	0	0	0	0	0	0	0	0	0	0	0	0	0
PF01163	RIO1	RIO1 family	7	5	66	73	5	8	7	8	58	59	0.910931	1.41398	5.48889	5.65778	0.0472497	1.04875	-0.0820116	0.514571	-0.596583		0	0	-2	1	0	4	0	0	2	-1	-3	2	-1	1	0	1	3	-1	0	0	-2	3	0	-3	1	0	1
PF01165	Ribosomal_S21	Ribosomal protein S21	3	4	25	41	1	4	2	4	25	35	0.438596	1.21457	2.28	3.29333	0.782298	0.16421	-0.424305	0.164113	-0.588418		0	0	-1	1	1	1	0	0	0	0	0	-1	0	0	0	0	-1	-1	0	0	0	0	2	0	0	0	0
PF01166	TSC22	TSC-22/dip/bun family	0	0	4	32	1	3	0	3	3	24	3.94737	1.31579	0.253333	2.28	2.3495	0.24607	0.90197	0.207709	0.694261		0	0	0	0	0	0	0	0	0	0	0	0	0	0	0	0	0	0	0	-1	-1	-1	-1	0	0	0	0
PF01167	Tub	Tub family	5	5	45	58	6	6	2	7	39	46	1.73299	1.34062	3.46222	4.47556	2.00809	0.561872	0.805591	0.343416	0.462176		-3	0	-2	-1	0	1	0	0	0	0	3	0	2	4	-1	0	3	0	-1	0	0	0	6	-4	0	-1	0
PF01168	Ala_racemase_N	Alanine racemase, N-terminal domain	5	6	45	61	4	8	1	4	43	51	1.07656	1.72249	3.71556	4.64444	0.0236027	2.6173	0.0565548	0.975908	-0.919353		1	-1	0	3	0	1	0	0	0	0	-1	-1	-1	-1	0	0	3	-1	1	0	-2	0	1	-3	-1	-1	0
PF01169	UPF0016	Uncharacterized protein family UPF0016	4	4	48	54	3	2	6	3	42	50	0.740132	0.446872	4.05333	4.47556	0.297362	1.49059	-0.232442	-0.653404	0.420962		-1	0	0	-1	1	-1	1	0	0	1	0	0	0	0	0	0	4	-1	0	0	-3	3	4	-11	0	0	0
PF01170	UPF0020	Putative RNA methylase family UPF0020	6	6	68	77	6	7	9	5	53	67	1.14601	1.15132	5.23556	6.08	0.120927	0.150818	0.13785	0.156297	-0.0184468		-2	-4	-1	6	-1	2	0	0	-1	1	0	0	0	2	0	0	10	1	-1	0	-6	9	7	-6	1	1	0
PF01171	ATP_bind_3	PP-loop family	6	2	53	71	5	4	6	6	45	58	1.16099	0.740132	4.30667	5.40444	0.12092	0.396482	0.137845	-0.276617	0.414462		0	0	-1	0	0	1	0	0	0	0	2	-1	1	1	0	1	1	0	0	0	-1	3	5	-2	0	1	0
PF01172	SBDS	Shwachman-Bodian-Diamond syndrome (SBDS) protein	1	1	22	36	2	0	2	1	18	34	1.18421	0	1.68889	2.95556	0.0620753	3.22816	0.0951518	-1.14037	1.23552		0	0	0	0	4	0	0	0	0	0	0	0	0	0	0	0	0	-1	0	0	0	0	0	0	0	1	-1
PF01174	SNO	SNO glutamine amidotransferase family	4	2	28	44	2	3	4	1	24	41	0.845865	0.845865	2.36444	3.54667	0.0609799	0.0914698	-0.094229	-0.117864	0.0236355		0	0	-1	2	1	0	0	0	0	1	1	0	0	0	0	0	-1	0	0	0	0	0	0	-1	0	-1	0
PF01175	Urocanase	Urocanase Rossmann-like domain	0	5	5	23	1	5	0	1	4	21	2.96053	2.69139	0.337778	1.85778	1.39237	5.70742	0.623412	1.77229	-1.14887		0	-1	0	0	0	0	0	0	0	0	-1	0	-1	-1	0	0	-1	0	0	0	0	0	1	0	0	0	0
PF01176	eIF-1a	Translation initiation factor 1A / IF-1	7	2	45	46	6	2	5	4	39	38	1.61483	0.56391	3.71556	3.54667	1.5173	0.73362	0.661488	-0.407033	1.06852		0	-2	0	1	0	0	0	0	1	0	1	0	1	1	0	1	-1	1	0	0	0	0	4	0	0	0	1
PF01177	Asp_Glu_race	Asp/Glu/Hydantoin racemase	2	6	25	54	1	8	1	3	24	47	0.473684	1.89474	2.11111	4.22222	0.636475	3.6455	-0.371621	1.2501	-1.62172		0	-1	0	2	-1	-1	0	0	0	0	-1	0	-1	0	-1	0	2	0	0	2	0	0	4	-5	-1	0	0
PF01179	Cu_amine_oxid	Copper amine oxidase, enzyme domain	3	5	35	64	2	10	1	5	32	50	0.717703	2.15311	2.78667	4.64444	0.241284	6.65076	-0.205317	2.00387	-2.20918		0	-1	0	4	0	0	0	0	0	1	-1	-1	-1	1	0	0	-1	0	0	0	-2	0	1	-2	0	0	2
PF01180	DHO_dh	Dihydroorotate dehydrogenase	5	2	48	56	2	6	5	4	44	46	0.483351	1.42105	4.13778	4.22222	1.202	0.809578	-0.563962	0.433863	-0.997825		0	0	0	2	1	0	0	1	0	0	-1	0	0	0	0	0	2	1	-1	0	-1	1	0	-2	0	1	0
PF01182	Glucosamine_iso	Glucosamine-6-phosphate isomerases/6-phosphogluconolactonase	6	4	45	56	10	3	6	4	32	50	3.11634	0.657895	3.20889	4.56	15.402	0.580092	4.06099	-0.350396	4.41139		0	1	1	0	1	-1	0	0	0	0	-1	0	-2	1	0	-1	1	1	0	0	-3	3	3	-3	0	0	-1
PF01183	Glyco_hydro_25	Glycosyl hydrolases family 25	0	0	10	25	1	1	0	2	7	21	1.69173	0.514874	0.591111	1.94222	0.305407	0.497344	0.236188	-0.318154	0.554342		0	0	0	0	0	0	0	0	0	0	0	0	0	0	0	0	0	0	0	0	0	0	1	0	0	0	0
PF01184	Gpr1_Fun34_YaaH	GPR1/FUN34/yaaH family	1	6	18	49	0	7	3	4	16	43	0	1.76372	1.60444	3.96889	1.75243	2.49855	-0.731488	0.943282	-1.67477		0	-1	-1	0	0	0	0	0	0	0	-1	0	-1	0	0	0	-1	-1	1	0	-1	-1	-1	0	0	0	0
PF01186	Lysyl_oxidase	Lysyl oxidase	0	0	1	5	0	0	1	1	0	4	0	0	0.0844444	0.422222	0.092233	0.461165	-0.118411	-0.303574	0.185162		0	0	0	0	0	0	0	0	0	0	0	0	0	0	0	0	0	0	0	0	0	0	0	0	0	0	0
PF01187	MIF	Macrophage migration inhibitory factor (MIF)	2	5	20	59	0	8	2	7	19	45	0	1.82186	1.77333	4.39111	1.93689	3.20022	-0.78514	1.13295	-1.91809		0	-1	0	0	-1	1	0	0	1	0	0	0	-1	-1	0	0	0	0	-1	0	0	0	1	-1	0	0	-1
PF01188	0	0	0	0	36	60	0	5	3	5	30	48	0	1.11718	2.78667	4.47556	3.04369	0.0665929	-1.09124	0.0988885	-1.19013		0	0	0	0	0	0	0	0	0	0	0	0	0	0	0	0	0	0	0	0	0	0	1	0	-1	0	1
PF01189	Methyltr_RsmB-F	16S rRNA methyltransferase RsmB/F	7	7	169	28	13	3	16	3	139	27	0.993209	1.18421	13.0889	2.53333	0.000654665	0.093113	-0.00895689	0.11904	-0.127997		-4	-1	-2	3	0	3	0	0	-2	1	0	0	-3	2	-3	1	12	-1	1	11	4	29	28	4	7	6	5
PF01191	RNA_pol_Rpb5_C	RNA polymerase Rpb5, C-terminal domain	1	2	17	33	0	3	3	1	14	29	0	1.18421	1.43556	2.53333	1.56796	0.093113	-0.676741	0.11904	-0.795781		0	-1	0	0	0	1	0	0	0	0	-1	0	0	0	0	0	0	0	0	0	0	0	2	0	0	-1	0
PF01192	RNA_pol_Rpb6	RNA polymerase Rpb6	1	1	24	27	0	1	3	4	21	21	0	0.473684	2.02667	2.11111	2.21359	0.636475	-0.863915	-0.371621	-0.492293		0	0	0	0	0	1	0	0	0	0	0	0	0	0	0	0	-1	0	0	0	1	0	1	0	0	0	0
PF01193	RNA_pol_L	RNA polymerase Rpb3/Rpb11 dimerisation domain	6	4	57	55	5	3	7	2	49	50	1.05733	0.683198	4.72889	4.39111	0.0168492	0.478944	0.0473426	-0.310779	0.358122		-1	0	0	1	0	-1	0	0	2	-2	1	1	0	1	0	0	-1	1	0	1	0	0	4	-1	1	0	0
PF01194	RNA_pol_N	RNA polymerases N / 8 kDa subunit	1	1	12	61	0	3	2	5	11	49	0	0.657895	1.09778	4.56	1.19903	0.580092	-0.563018	-0.350396	-0.212622		0	0	0	0	1	0	0	0	0	0	0	0	0	0	0	0	0	-1	0	-1	-1	0	4	0	0	0	0
PF01195	Pept_tRNA_hydro	Peptidyl-tRNA hydrolase	1	5	12	38	0	5	2	3	10	35	0	1.55817	1.01333	3.20889	1.1068	1.08037	-0.533459	0.524889	-1.05835		-1	0	-1	0	0	0	0	0	-1	0	-1	0	-1	0	0	0	2	0	0	0	0	0	3	-1	-1	0	0
PF01196	Ribosomal_L17	Ribosomal protein L17	2	2	32	47	1	4	5	0	27	41	0.370066	1.15533	2.70222	3.46222	1.16792	0.090494	-0.553109	0.117163	-0.670271		0	0	0	1	0	-1	0	0	0	0	1	0	0	0	0	0	-1	0	0	0	0	0	1	-1	0	0	-1
PF01197	Ribosomal_L31	Ribosomal protein L31	0	4	19	23	2	3	2	4	15	16	1.39319	1.77632	1.43556	1.68889	0.240072	1.0985	0.204708	0.530774	-0.326065		0	0	0	-1	0	0	0	0	0	-1	0	0	-1	0	0	0	0	0	-1	0	0	3	1	0	0	0	0
PF01198	Ribosomal_L31e	Ribosomal protein L31e	2	0	35	40	5	2	2	2	28	31	1.97368	0.717703	2.53333	2.78667	2.58916	0.241284	0.968198	-0.205317	1.17352		0	0	0	0	0	0	0	0	0	0	0	0	0	0	0	0	1	1	0	6	0	0	9	-1	0	0	1
PF01199	Ribosomal_L34e	Ribosomal protein L34e	1	0	31	44	2	1	0	4	27	35	0.877193	0.303644	2.28	3.29333	0.0373201	1.74026	-0.0722116	-0.727912	0.6557		0	0	0	0	0	0	0	0	0	0	0	0	0	0	0	0	2	0	0	1	2	-2	5	-1	0	-1	0
PF01200	Ribosomal_S28e	Ribosomal protein S28e	0	1	27	64	1	5	1	5	23	51	0.493421	1.05733	2.02667	4.72889	0.565969	0.0168492	-0.344991	0.0473426	-0.392334		0	0	0	0	0	0	0	0	0	0	0	0	0	0	0	0	-1	0	0	4	1	-2	6	-2	0	0	0
PF01201	Ribosomal_S8e	Ribosomal protein S8e	4	2	42	55	4	6	3	3	38	45	1.15533	1.48026	3.46222	4.05333	0.090494	1.01078	0.117163	0.502082	-0.38492		0	-1	-1	1	1	0	0	0	0	0	0	0	0	0	0	0	1	1	0	-1	0	-3	12	0	0	0	-1
PF01202	SKI	Shikimate kinase	4	3	47	47	7	2	4	0	39	44	1.92778	0.538278	3.63111	3.71556	3.37037	0.861714	1.17797	-0.451906	1.62988		-1	0	1	0	0	0	0	0	0	0	0	-1	-2	1	0	0	1	1	0	0	-1	0	0	0	-1	0	0
PF01204	Trehalase	Trehalase	2	1	27	60	2	6	1	7	24	43	0.947368	1.42105	2.11111	4.22222	0.00634398	0.809578	-0.0284847	0.433863	-0.462348		0	0	0	0	0	0	0	0	0	0	1	0	-1	0	0	0	1	0	0	0	-1	0	1	-3	0	0	0
PF01205	UPF0029	Uncharacterized protein family UPF0029	5	3	62	60	6	7	6	4	52	49	1.22505	1.56405	4.89778	4.47556	0.268606	1.53869	0.21877	0.66794	-0.44917		1	0	0	1	0	0	1	0	0	0	2	0	-1	0	-1	0	0	-1	1	0	-1	3	3	-1	1	0	-1
PF01206	TusA	Sulfurtransferase TusA	0	0	1	12	0	1	0	5	1	5	0	1.18421	0.0844444	0.844444	0.092233	0.0310377	-0.118411	0.0654226	-0.183834		0	0	0	0	0	0	0	0	0	0	0	0	0	0	0	0	0	0	0	0	0	0	0	0	0	0	0
PF01207	Dus	Dihydrouridine synthase (Dus)	4	6	172	29	15	2	17	2	135	29	1.16863	0.764007	12.8356	2.61778	0.395376	0.158353	0.276145	-0.160725	0.436869		-2	-2	2	5	0	-1	0	0	0	0	2	0	-3	3	0	0	-1	-1	0	6	5	10	16	0	3	8	8
PF01208	URO-D	Uroporphyrinogen decarboxylase (URO-D)	2	2	54	52	1	4	3	3	50	44	0.223436	1.00784	4.47556	3.96889	2.9429	0.000264452	-1.06421	0.00567168	-1.06988		0	0	-1	1	0	0	0	0	0	0	0	0	0	0	-1	0	2	0	0	2	0	-1	5	-2	0	0	-1
PF01209	Ubie_methyltran	ubiE/COQ5 methyltransferase family	8	9	173	31	11	4	16	3	147	31	0.79916	1.39319	13.7644	2.87111	0.602903	0.480144	-0.359049	0.311263	-0.670312		-4	-7	-8	19	10	8	-2	2	0	0	-4	2	-7	5	-5	-3	9	2	-3	34	18	29	44	11	16	6	8
PF01210	NAD_Gly3P_dh_N	NAD-dependent glycerol-3-phosphate dehydrogenase N-terminus	3	2	64	63	6	4	8	6	51	48	1.20428	0.877193	4.98222	4.56	0.225173	0.0746402	0.19714	-0.105298	0.302438		0	-2	0	4	0	0	0	0	-1	0	1	0	0	0	0	2	0	0	0	0	0	9	3	-8	-1	0	0
PF01212	Beta_elim_lyase	Beta-eliminating lyase	6	5	167	24	11	4	15	2	138	21	0.851393	2.0595	12.92	1.94222	0.309725	2.3492	-0.238186	0.901884	-1.14007		2	1	-2	0	0	4	-1	0	1	0	0	4	0	-1	-1	0	0	-1	2	10	7	19	39	4	8	3	9
PF01213	CAP_N	Adenylate cyclase associated (CAP) N terminal	1	2	33	27	3	2	2	4	27	21	1.22505	0.947368	2.44889	2.11111	0.134303	0.00634398	0.146295	-0.0284847	0.174779		0	0	1	0	0	0	0	0	0	0	0	-1	0	0	-1	0	0	0	0	0	1	0	3	0	0	0	0
PF01214	CK_II_beta	Casein kinase II regulatory subunit	4	1	32	47	3	2	4	2	28	42	1.1102	0.538278	2.70222	3.71556	0.0355598	0.861714	0.0703627	-0.451906	0.522269		0	0	0	1	0	1	0	0	0	0	0	0	0	1	0	0	1	-1	0	0	-2	35	2	-3	0	0	1
PF01215	COX5B	Cytochrome c oxidase subunit Vb	2	3	25	45	2	4	3	2	22	38	0.947368	1.18421	2.11111	3.37778	0.00634398	0.124151	-0.0284847	0.139916	-0.168401		-1	0	0	0	0	0	0	0	0	0	1	0	-1	0	0	0	1	-1	0	0	1	0	2	-2	0	0	0
PF01216	Calsequestrin	Calsequestrin	1	2	4	26	0	4	1	1	3	20	0	2.25564	0.337778	1.77333	0.368932	3.00935	-0.264731	1.08205	-1.34678		0	0	-1	0	0	2	0	0	0	0	0	0	0	0	0	0	-1	0	0	0	0	0	0	0	0	0	0
PF01217	Clat_adaptor_s	Clathrin adaptor complex small chain	7	5	68	76	3	8	7	7	62	62	0.514874	1.373	5.82667	5.82667	1.49203	0.877013	-0.65384	0.457148	-1.11099		3	-2	-1	2	1	2	0	0	0	1	1	-1	1	-2	0	0	0	-1	0	0	-6	1	5	-5	-1	1	-1
PF01218	Coprogen_oxidas	Coproporphyrinogen III oxidase	5	2	54	46	6	7	5	2	48	36	1.34062	2.18144	4.47556	3.20889	0.561872	4.82289	0.343416	1.55154	-1.20812		1	0	-1	0	0	1	0	0	0	0	3	0	1	-1	1	0	0	0	0	0	1	0	3	-1	0	0	1
PF01219	DAGK_prokar	Prokaryotic diacylglycerol kinase	0	0	0	0	0	0	0	0	0	0	0	0	0	0	0	0	FALSE	FALSE	FALSE		0	0	0	0	0	0	0	0	0	0	0	0	0	0	0	0	0	0	0	0	0	0	0	0	0	0	0
PF01220	DHquinase_II	Dehydroquinase class II	0	2	6	17	0	3	1	1	5	14	0	2.36842	0.506667	1.26667	0.553398	2.55148	-0.340148	0.957853	-1.298		0	0	0	-1	0	0	0	0	0	0	0	0	-1	0	0	0	0	0	0	1	0	0	0	-2	0	0	0
PF01221	Dynein_light	Dynein light chain type 1	5	2	140	33	11	2	12	3	115	29	1.02569	0.740132	10.7244	2.70222	0.00767675	0.198241	0.0314325	-0.183001	0.214433		0	0	-1	0	0	2	0	0	0	0	5	-2	2	1	0	0	5	0	0	12	10	11	27	9	10	0	0
PF01222	ERG4_ERG24	Ergosterol biosynthesis ERG4/ERG24 family	9	2	55	46	4	2	5	5	54	35	0.802855	0.592105	4.98222	3.37778	0.210269	0.611138	-0.189394	-0.362151	0.172757		1	0	1	-1	1	0	1	0	0	1	1	-1	1	0	0	0	1	0	1	2	-2	0	2	-4	0	1	0
PF01223	Endonuclease_NS	DNA/RNA non-specific endonuclease	1	6	26	51	0	5	1	6	23	39	0	1.31579	2.02667	3.8	2.21359	0.410116	-0.863915	0.282404	-1.14632		-1	-1	-1	1	0	0	-1	0	0	0	0	0	-1	0	0	0	-1	0	0	0	0	0	0	0	1	2	-1
PF01225	Mur_ligase	Mur ligase family, catalytic domain	0	0	10	27	0	2	1	7	8	16	0	1.02975	0.76	1.94222	0.830097	0.00186357	-0.440998	0.0152177	-0.456216		0	0	0	0	0	0	0	0	0	0	0	0	0	0	0	0	0	0	0	0	0	0	-1	0	0	0	0
PF01226	Form_Nir_trans	Formate/nitrite transporter	5	5	48	55	5	7	6	2	41	47	1.2598	1.69173	3.96889	4.13778	0.290016	2.13785	0.228993	0.842533	-0.613539		2	2	0	-1	2	0	0	0	0	0	-1	0	2	-1	-1	-1	3	0	0	0	-1	1	0	0	0	1	0
PF01227	GTP_cyclohydroI	GTP cyclohydrolase I	3	1	32	51	2	5	5	3	26	41	0.764007	1.34569	2.61778	3.71556	0.158353	0.480456	-0.160725	0.311388	-0.472113		0	-1	1	0	1	0	0	0	0	0	0	0	0	0	0	0	1	0	0	0	-1	0	0	-1	0	0	-1
PF01228	Gly_radical	Glycine radical	1	4	9	42	0	8	1	3	9	32	0	2.70677	0.844444	2.95556	0.92233	9.24515	-0.472546	2.62687	-3.09941		0	0	0	0	0	0	0	-1	0	0	-1	0	0	0	0	0	-1	-1	3	2	-1	0	-1	-1	0	0	0
PF01229	Glyco_hydro_39	Glycosyl hydrolases family 39	1	4	9	18	0	4	0	0	9	17	0	2.78638	0.76	1.43556	0.830097	4.91721	-0.440998	1.57527	-2.01627		0	0	0	1	0	0	0	0	0	0	-1	0	-1	-1	0	0	-1	0	0	0	0	0	1	0	0	0	0
PF01230	HIT	HIT domain	5	5	59	63	3	4	7	2	53	59	0.592105	0.776531	5.06667	5.15111	0.916707	0.279377	-0.470645	-0.223946	-0.246699		0	-3	-2	2	1	3	0	0	1	0	-3	-2	0	0	0	0	-1	1	0	0	-1	1	1	0	-1	1	0
PF01231	IDO	Indoleamine 2,3-dioxygenase	2	2	26	50	0	4	2	3	24	42	0	1.05263	2.19556	3.8	2.39806	0.0114113	-0.915474	0.0386126	-0.954087		0	0	0	1	0	0	0	0	0	0	0	0	-1	0	-1	0	2	0	0	4	-1	-1	1	-1	0	0	0
PF01232	Mannitol_dh	Mannitol dehydrogenase Rossmann domain	1	5	21	41	1	10	2	2	19	28	0.56391	3.94737	1.77333	2.53333	0.36681	23.495	-0.263804	5.90227	-6.16607		0	-1	0	0	0	0	0	0	0	0	-1	-1	-1	-1	0	0	2	0	0	0	-1	0	0	-1	0	1	0
PF01233	NMT	Myristoyl-CoA:protein N-myristoyltransferase, N-terminal domain	2	1	28	36	1	3	4	0	24	30	0.422932	1.18421	2.36444	2.53333	0.857272	0.093113	-0.45038	0.11904	-0.56942		0	0	-1	0	1	0	0	0	0	0	0	0	0	0	0	0	1	0	0	1	-1	0	2	-2	0	0	1
PF01234	NNMT_PNMT_TEMT	NNMT/PNMT/TEMT family	0	0	1	13	0	0	0	1	1	11	0	0	0.0844444	1.01333	0.092233	1.1068	-0.118411	-0.533459	0.415048		0	0	0	0	0	0	0	0	0	0	0	0	0	0	0	0	0	0	0	0	-1	0	-1	-1	0	0	0
PF01237	Oxysterol_BP	Oxysterol-binding protein	0	0	19	20	3	1	1	2	15	15	2.22039	0.696594	1.35111	1.43556	2.16635	0.143603	0.850593	-0.15198	1.00257		0	0	0	0	0	0	0	0	0	0	0	0	0	0	0	0	0	0	0	0	0	0	0	0	0	0	0
PF01238	PMI_typeI	Phosphomannose isomerase type I	2	3	39	35	2	2	2	0	35	32	0.640114	0.740132	3.12444	2.70222	0.439915	0.198241	-0.294852	-0.183001	-0.111852		1	-1	-1	0	0	0	0	0	0	0	1	0	0	0	0	0	-1	0	0	0	0	1	1	-1	-1	0	1
PF01239	PPTA	Protein prenyltransferase alpha subunit repeat	7	3	56	56	8	2	6	4	45	50	1.85759	0.438596	4.30667	4.56	3.41675	1.5646	1.19019	-0.675731	1.86592		0	-1	0	1	1	0	0	1	0	1	1	1	0	1	-1	0	-1	0	0	0	-1	0	4	-2	1	1	0
PF01241	PSI_PSAK	Photosystem I psaG / psaK	0	0	10	21	0	1	3	0	7	19	0	0.623269	0.844444	1.60444	0.92233	0.247574	-0.472546	-0.208458	-0.264088		0	0	0	0	0	0	0	0	0	0	0	0	0	0	0	0	0	0	0	0	0	0	3	0	0	0	0
PF01242	PTPS	6-pyruvoyl tetrahydropterin synthase	2	4	25	50	4	2	2	3	19	47	2.25564	0.473684	1.77333	4.22222	3.00935	1.27295	1.08205	-0.586342	1.66839		-1	-1	-1	0	0	0	0	0	0	0	0	0	0	1	0	0	0	1	-1	0	-1	0	0	-1	0	0	-1
PF01243	Putative_PNPOx	Pyridoxamine 5'-phosphate oxidase	4	4	51	71	3	4	6	1	45	65	0.696594	0.717703	4.30667	5.57333	0.430808	0.482568	-0.291076	-0.312238	0.0211624		-1	-3	0	2	0	-1	0	1	0	0	0	0	0	1	1	0	0	0	-1	1	-1	0	0	-4	0	0	0
PF01244	Peptidase_M19	Membrane dipeptidase (Peptidase family M19)	0	0	7	25	0	3	1	3	5	19	0	1.61483	0.506667	1.85778	0.553398	0.758652	-0.340148	0.415951	-0.756099		0	0	0	0	0	0	0	0	0	0	0	0	0	0	0	0	0	0	0	0	0	0	0	0	0	0	0
PF01245	Ribosomal_L19	Ribosomal protein L19	4	0	23	46	1	2	2	3	23	36	0.473684	0.607287	2.11111	3.29333	0.636475	0.552269	-0.371621	-0.339712	-0.0319096		0	0	0	0	0	0	0	0	1	0	0	0	0	1	0	0	1	1	0	1	2	-1	1	-2	0	0	0
PF01246	Ribosomal_L24e	Ribosomal protein L24e	2	1	38	51	5	1	2	3	31	45	1.79426	0.246711	2.78667	4.05333	1.89708	2.50746	0.773643	-0.945739	1.71938		0	-1	0	0	0	0	0	0	0	0	0	1	0	0	0	0	1	0	0	2	0	-1	13	-1	-2	0	1
PF01247	Ribosomal_L35Ae	Ribosomal protein L35Ae	2	1	36	54	2	3	3	3	30	45	0.717703	0.740132	2.78667	4.05333	0.241284	0.297362	-0.205317	-0.232442	0.0271258		1	0	0	0	0	0	0	0	-1	0	0	0	0	0	0	0	1	0	0	0	-2	30	10	-7	0	0	0
PF01248	Ribosomal_L7Ae	Ribosomal protein L7Ae/L30e/S12e/Gadd45 family	5	5	175	25	14	1	15	1	142	26	1.05598	0.438596	13.2578	2.28	0.0450449	0.782298	0.0799176	-0.424305	0.504223		-1	-2	-1	1	0	1	0	0	-1	1	2	0	0	0	0	-1	1	0	0	30	19	29	57	15	11	4	4
PF01249	Ribosomal_S21e	Ribosomal protein S21e	2	1	34	51	1	1	4	4	28	43	0.370066	0.25196	2.70222	3.96889	1.16792	2.42103	-0.553109	-0.921848	0.368739		0	1	0	0	1	0	0	0	0	0	0	0	0	0	0	0	-1	0	0	1	-1	0	6	0	-1	0	1
PF01250	Ribosomal_S6	Ribosomal protein S6	3	4	22	50	1	3	2	1	22	48	0.493421	0.725027	2.02667	4.13778	0.565969	0.339906	-0.344991	-0.251902	-0.093089		-1	0	0	0	1	-1	0	0	1	0	0	0	0	0	0	0	-1	1	-1	0	0	0	1	0	0	0	0
PF01251	Ribosomal_S7e	Ribosomal protein S7e	1	1	36	36	6	1	0	4	29	28	2.45009	0.370066	2.44889	2.70222	5.53684	1.16792	1.73002	-0.553109	2.28312		0	-1	0	0	0	0	0	0	0	0	0	0	0	0	0	0	1	0	0	4	-2	0	9	-3	0	0	1
PF01253	SUI1	Translation initiation factor SUI1	5	6	54	56	6	6	6	2	46	51	1.3664	1.34062	4.39111	4.47556	0.637777	0.561872	0.372105	0.343416	0.0286891		-1	1	0	0	1	1	0	0	0	0	-1	-1	-1	0	-1	0	1	2	-2	0	-2	5	3	-1	0	0	0
PF01255	Prenyltransf	Putative undecaprenyl diphosphate synthase	2	5	46	52	2	4	4	5	40	46	0.538278	0.928793	3.71556	4.30667	0.861714	0.0236921	-0.451906	-0.0566683	-0.395238		0	-1	0	1	2	0	0	0	-1	0	0	0	0	-1	0	0	-1	-1	0	0	0	0	1	0	0	1	0
PF01256	Carb_kinase	Carbohydrate kinase	2	3	27	47	0	4	4	1	23	41	0	1.12782	2.28	3.54667	2.49029	0.0627857	-0.941003	0.0957466	-1.03675		0	0	-1	1	0	0	0	0	0	-1	0	0	0	0	0	0	2	0	-1	1	0	-1	0	-2	1	0	0
PF01257	2Fe-2S_thioredx	Thioredoxin-like [2Fe-2S] ferredoxin	3	2	35	46	3	4	3	3	32	40	1.01504	1.10159	2.95556	3.63111	0.000724703	0.0406136	0.00942883	0.075573	-0.0661442		0	0	-1	2	0	0	1	0	0	0	0	0	0	1	0	0	-1	0	0	0	0	0	2	0	0	0	0
PF01258	zf-dskA_traR	Prokaryotic dksA/traR C4-type zinc finger	0	0	3	17	0	3	0	4	3	10	0	2.53759	0.253333	1.18222	0.276699	3.0039	-0.222665	1.08059	-1.30325		0	0	0	0	0	0	0	0	0	0	0	0	0	0	0	0	0	0	0	0	0	0	0	0	0	0	0
PF01259	SAICAR_synt	SAICAR synthetase	1	0	38	38	2	2	1	1	34	30	0.676692	0.764007	2.95556	2.61778	0.335759	0.158353	-0.250042	-0.160725	-0.089317		0	0	0	0	0	0	0	0	0	0	0	0	0	0	0	0	1	0	0	0	-1	7	0	-1	0	0	-1
PF01261	AP_endonuc_2	Xylose isomerase-like TIM barrel	4	5	43	54	4	5	3	7	37	44	1.18421	1.16099	3.37778	4.30667	0.124151	0.12092	0.139916	0.137845	0.0020711		0	-2	0	2	1	-1	0	0	-1	0	1	-1	0	0	0	0	0	2	-1	1	-1	0	6	-5	-1	0	1
PF01262	AlaDh_PNT_C	Alanine dehydrogenase/PNT, C-terminal domain	6	6	61	63	5	7	8	6	52	51	0.986842	1.45429	5.06667	4.81333	0.000951349	1.07418	-0.0108199	0.522873	-0.533693		-1	0	-1	2	0	1	1	-1	-1	0	0	0	-1	1	0	1	4	0	-1	1	-6	7	6	-4	0	1	0
PF01263	Aldose_epim	Aldose 1-epimerase	8	2	59	70	6	5	8	4	51	57	1.20428	0.970664	4.98222	5.15111	0.225173	0.00480821	0.19714	-0.0246978	0.221838		0	0	-1	2	1	1	1	0	0	0	0	1	0	1	-1	0	1	1	0	2	0	0	3	-4	0	0	3
PF01264	Chorismate_synt	Chorismate synthase	3	1	28	34	1	0	3	0	25	32	0.422932	0	2.36444	2.70222	0.857272	2.95146	-0.45038	-1.06651	0.616132		0	0	0	2	0	0	0	0	-1	0	1	0	0	0	0	0	1	0	0	0	-1	0	2	0	0	0	0
PF01265	Cyto_heme_lyase	Cytochrome c/c1 heme lyase	3	0	35	47	3	3	4	3	30	37	1.04489	0.888158	2.87111	3.37778	0.00627279	0.0458534	0.0283194	-0.0806904	0.10901		0	0	0	2	1	0	0	0	0	0	1	0	0	0	0	0	0	0	0	0	0	0	0	-2	0	0	0
PF01266	DAO	FAD dependent oxidoreductase	9	10	132	99	7	12	12	9	114	85	0.657895	1.51176	10.64	7.93778	1.35355	2.24715	-0.611439	0.873347	-1.48479		-1	-10	-3	20	4	4	-1	2	-2	2	3	-1	-2	1	-2	-1	16	3	-2	54	-22	73	82	-21	25	3	16
PF01267	F-actin_cap_A	F-actin capping protein alpha subunit	1	3	26	38	1	3	1	2	24	31	0.473684	1.07656	2.11111	2.78667	0.636475	0.017702	-0.371621	0.0485873	-0.420208		1	-1	0	0	0	-1	0	0	0	0	0	0	0	0	0	0	0	0	-1	0	0	0	3	-1	0	0	1
PF01268	FTHFS	Formate--tetrahydrofolate ligase	4	2	38	20	0	1	4	1	37	19	0	0.592105	3.46222	1.68889	3.78155	0.305569	-1.2855	-0.236264	-1.04923		1	-1	0	1	1	0	0	0	0	0	0	0	0	-1	0	0	0	1	0	0	0	0	5	2	0	0	0
PF01269	Fibrillarin	Fibrillarin	2	0	35	25	2	1	3	0	30	22	0.717703	0.538278	2.78667	1.85778	0.241284	0.430857	-0.205317	-0.291096	0.0857792		0	0	0	0	1	0	0	0	0	0	0	0	0	0	0	0	3	0	0	2	-4	3	6	-3	0	0	0
PF01270	Glyco_hydro_8	Glycosyl hydrolases family 8	2	3	23	40	1	4	3	3	20	34	0.514874	1.28023	1.94222	3.12444	0.497344	0.265595	-0.318154	0.217311	-0.535464		0	-1	0	1	0	0	0	0	0	0	-1	0	-1	0	0	0	1	0	0	0	-1	1	0	0	0	0	0
PF01272	GreA_GreB	Transcription elongation factor, GreA/GreB, C-term	0	0	1	11	0	1	0	4	1	6	0	1.18421	0.0844444	0.844444	0.092233	0.0310377	-0.118411	0.0654226	-0.183834		0	0	0	0	0	0	0	0	0	0	0	0	0	0	0	0	0	0	0	0	0	0	0	0	0	0	0
PF01273	LBP_BPI_CETP	LBP / BPI / CETP family, N-terminal domain	0	0	8	30	0	5	2	2	5	22	0	2.46711	0.591111	2.02667	0.645631	4.68995	-0.375018	1.51799	-1.89301		0	0	0	0	0	0	0	0	0	0	0	0	0	0	0	0	0	0	0	0	0	0	0	0	0	0	0
PF01274	Malate_synthase	Malate synthase	5	2	36	33	7	1	4	3	27	29	2.67402	0.370066	2.61778	2.70222	7.8787	1.16792	2.30085	-0.553109	2.85396		-1	0	2	-1	0	0	0	0	1	0	2	0	1	1	0	0	0	0	0	2	-1	0	0	-2	0	0	0
PF01276	OKR_DC_1	Orn/Lys/Arg decarboxylase, major domain	2	4	7	32	2	3	0	1	7	29	3.38346	1.18421	0.591111	2.53333	3.59408	0.093113	1.23668	0.11904	1.11764		0	-1	0	0	0	-1	0	0	-1	1	1	0	0	0	0	0	-1	0	0	0	0	0	1	0	0	0	0
PF01280	Ribosomal_L19e	Ribosomal protein L19e	2	0	41	33	6	1	4	4	31	24	2.03008	0.422932	2.95556	2.36444	3.37963	0.857272	1.18041	-0.45038	1.63079		0	0	0	0	0	0	0	0	0	0	0	0	1	0	0	0	2	0	0	0	-3	0	9	-6	-1	0	0
PF01281	Ribosomal_L9_N	Ribosomal protein L9, N-terminal domain	1	3	30	57	3	2	2	2	25	52	1.31579	0.438596	2.28	4.56	0.24607	1.5646	0.207709	-0.675731	0.88344		-1	0	0	0	0	0	0	0	0	0	0	0	1	0	0	0	-1	0	-1	0	0	2	1	-2	0	0	0
PF01282	Ribosomal_S24e	Ribosomal protein S24e	2	1	38	44	6	2	2	1	30	38	2.22039	0.607287	2.70222	3.29333	4.33269	0.552269	1.42728	-0.339712	1.76699		0	-1	1	2	0	0	0	0	0	0	0	0	0	0	0	0	0	0	0	0	1	-1	10	-2	-1	1	0
PF01283	Ribosomal_S26e	Ribosomal protein S26e	5	2	37	53	6	3	4	3	30	44	2.08978	0.755879	2.87111	3.96889	3.67349	0.25692	1.2574	-0.213075	1.47047		1	-1	1	0	1	0	0	0	0	0	1	0	0	0	0	0	-1	1	0	0	0	3	8	-3	0	-1	1
PF01284	MARVEL	Membrane-associating domain	0	4	7	42	2	3	0	5	5	38	4.73684	0.826193	0.422222	3.63111	6.27436	0.119092	1.91187	-0.136664	2.04854		-1	0	0	0	0	0	0	0	0	0	-1	-1	0	0	0	0	-1	0	0	0	0	0	0	0	0	0	0
PF01287	eIF-5a	Eukaryotic elongation factor 5A hypusine, DNA-binding OB fold	2	1	40	46	4	3	2	4	34	37	1.31579	0.866496	3.04	3.46222	0.328093	0.0669791	0.246582	-0.0992031	0.345785		0	2	0	0	0	0	0	0	0	0	1	-1	0	0	0	0	0	0	0	-5	3	-1	9	1	-1	0	1
PF01288	HPPK	7,8-dihydro-6-hydroxymethylpterin-pyrophosphokinase (HPPK)	1	3	14	52	0	2	1	5	13	47	0	0.455466	1.18222	4.39111	1.29126	1.41729	-0.592073	-0.631063	0.0389901		0	0	-1	2	-1	0	0	0	0	0	0	0	0	0	0	0	-1	0	0	0	-1	0	0	0	0	0	0
PF01290	Thymosin	Thymosin beta-4 family	0	0	2	11	0	0	0	2	2	9	0	0	0.168889	0.928889	0.184466	1.01456	-0.175508	-0.50333	0.327823		0	0	0	0	0	0	0	0	0	0	0	0	0	0	0	0	0	0	0	0	0	0	-1	0	0	0	0
PF01292	Ni_hydr_CYTB	Prokaryotic cytochrome b561	3	4	13	50	1	4	1	6	14	41	0.789474	1.00784	1.26667	3.96889	0.0609669	0.000264452	-0.094218	0.00567168	-0.0998897		-1	0	0	0	0	0	-1	0	0	0	0	-1	0	1	-1	0	3	1	0	0	0	0	0	0	2	0	0
PF01293	PEPCK_ATP	Phosphoenolpyruvate carboxykinase	3	2	44	46	2	5	3	3	39	37	0.56391	1.48026	3.54667	3.37778	0.73362	0.84232	-0.407033	0.445227	-0.85226		0	-1	1	0	0	0	0	0	1	0	-1	0	0	0	0	0	3	0	0	3	-4	0	1	-3	1	-1	2
PF01294	Ribosomal_L13e	Ribosomal protein L13e	1	1	30	35	2	3	2	1	25	28	0.877193	1.22505	2.28	2.44889	0.0373201	0.134303	-0.0722116	0.146295	-0.218506		0	-1	0	0	0	0	0	0	0	0	0	0	0	0	0	0	1	0	0	5	-1	-1	13	-3	0	0	0
PF01297	ZnuA	Zinc-uptake complex component A periplasmic	0	0	2	14	0	1	0	4	2	8	0	0.986842	0.168889	1.01333	0.184466	0.00019027	-0.175508	-0.00480614	-0.170702		0	0	0	0	0	0	0	0	0	0	0	0	0	0	0	0	0	0	0	0	0	0	0	0	0	0	0
PF01300	Sua5_yciO_yrdC	Telomere recombination	2	4	36	52	2	6	6	4	30	44	0.657895	1.48026	3.04	4.05333	0.386728	1.01078	-0.272439	0.502082	-0.774521		0	-1	-1	2	-1	0	0	0	0	0	1	0	0	-1	0	0	0	0	0	0	-1	1	1	-2	0	0	0
PF01301	Glyco_hydro_35	Glycosyl hydrolases family 35	2	3	27	50	2	7	1	4	24	37	0.947368	2.02182	2.11111	3.46222	0.00634398	3.896	-0.0284847	1.31514	-1.34363		1	-1	0	0	0	1	0	0	0	0	-1	0	0	-1	0	0	0	0	0	1	-3	1	0	-5	0	0	0
PF01302	CAP_GLY	CAP-Gly domain	5	5	67	74	5	5	7	6	55	63	0.955008	0.858124	5.23556	5.82667	0.0114964	0.127309	-0.0387623	-0.141921	0.103158		0	5	-1	-1	0	1	0	1	0	0	0	-2	-3	1	-1	0	10	0	0	0	-8	1	3	-5	4	0	3
PF01305	0	0	0	0	0	0	0	0	0	0	0	0	0	0	0	0	0	0	FALSE	FALSE	FALSE		0	0	0	0	0	0	0	0	0	0	0	0	0	0	0	0	0	0	0	0	0	0	0	0	0	0	0
PF01306	LacY_symp	LacY proton/sugar symporter	2	5	24	56	2	4	3	3	20	53	1.02975	0.845865	1.94222	4.72889	0.00186357	0.12196	0.0152177	-0.138514	0.153732		0	-1	0	0	1	0	0	-1	0	0	-1	0	0	0	0	-1	1	-1	0	0	0	2	0	0	0	0	0
PF01312	Bac_export_2	FlhB HrpN YscU SpaS Family	0	0	1	10	0	1	0	1	1	8	0	1.31579	0.0844444	0.76	0.092233	0.0820232	-0.118411	0.110937	-0.229349		0	0	0	0	0	0	0	0	0	0	0	0	0	0	0	0	0	0	0	0	0	0	0	0	0	0	0
PF01314	AFOR_C	Aldehyde ferredoxin oxidoreductase, domains 2 & 3	0	0	0	0	0	0	0	0	0	0	0	0	0	0	0	0	FALSE	FALSE	FALSE		0	0	0	0	0	0	0	0	0	0	0	0	0	0	0	0	0	0	0	0	0	0	0	0	0	0	0
PF01315	Ald_Xan_dh_C	Aldehyde oxidase and xanthine dehydrogenase, a/b hammerhead domain	3	4	42	49	3	4	1	5	36	42	0.960171	1.00784	3.12444	3.96889	0.0053765	0.000264452	-0.0261576	0.00567168	-0.0318293		0	0	-1	2	0	0	-1	0	0	0	0	-1	-1	1	0	0	1	0	0	2	-2	2	3	-2	0	0	1
PF01321	Creatinase_N	Creatinase/Prolidase N-terminal domain	3	1	46	42	3	3	3	3	41	34	0.807416	0.960171	3.71556	3.12444	0.149634	0.0053765	-0.155594	-0.0261576	-0.129436		0	0	-1	0	0	1	0	0	0	0	0	1	0	0	0	0	1	0	0	0	-2	1	1	-2	0	0	0
PF01323	DSBA	DSBA-like thioredoxin domain	5	4	54	51	4	4	5	2	45	46	0.947368	0.986842	4.22222	4.05333	0.012688	0.00076108	-0.0408082	-0.00966513	-0.031143		1	-2	-1	2	0	2	0	0	0	-1	-1	0	1	0	0	0	4	0	0	0	-1	1	7	-6	0	0	0
PF01326	PPDK_N	Pyruvate phosphate dikinase, AMP/ATP-binding domain	6	5	139	21	9	4	14	1	113	19	0.839204	2.36842	10.7244	1.68889	0.301021	3.40197	-0.23415	1.1863	-1.42045		0	0	-1	0	4	1	0	1	0	0	8	1	0	-2	-1	-1	11	-1	0	14	7	14	25	11	8	2	3
PF01327	Pep_deformylase	Polypeptide deformylase	3	4	53	65	3	6	6	2	42	57	0.740132	1.20428	4.05333	4.98222	0.297362	0.225173	-0.232442	0.19714	-0.429582		0	-1	-1	2	1	0	0	0	0	0	0	0	0	-1	-2	0	3	0	0	0	-3	2	2	-2	0	-1	0
PF01328	Peroxidase_2	Peroxidase, family 2	0	0	0	0	0	0	0	0	0	0	0	0	0	0	0	0	FALSE	FALSE	FALSE		0	0	0	0	0	0	0	0	0	0	0	0	0	0	0	0	0	0	0	0	0	0	0	0	0	0	0
PF01329	Pterin_4a	Pterin 4 alpha carbinolamine dehydratase	6	3	52	46	7	3	9	3	38	41	1.76372	0.807416	3.96889	3.71556	2.49855	0.149634	0.943282	-0.155594	1.09888		0	-1	0	1	1	0	0	0	0	1	2	0	0	1	0	0	-1	2	-1	-1	0	1	1	0	-1	0	0
PF01331	mRNA_cap_enzyme	mRNA capping enzyme, catalytic domain	2	4	31	49	4	2	1	4	24	44	1.89474	0.493421	2.11111	4.05333	1.82275	1.13194	0.75206	-0.54157	1.29363		-1	0	0	0	0	1	0	0	-1	0	0	0	0	1	-1	0	-1	0	0	0	-1	0	0	0	0	0	0
PF01333	Apocytochr_F_C	Apocytochrome F, C-terminal	0	0	11	45	0	6	0	5	10	30	0	2.03008	0.844444	2.95556	0.92233	3.37963	-0.472546	1.18041	-1.65296		0	0	0	0	0	0	0	0	0	0	0	0	0	0	0	0	0	0	0	1	0	-1	4	0	0	-1	0
PF01336	tRNA_anti-codon	OB-fold nucleic acid binding domain	6	5	171	31	14	3	16	2	138	29	1.07656	1.14601	13.0044	2.61778	0.0826094	0.0604636	0.111376	0.0937918	0.017584		-1	1	-1	-1	1	0	0	0	0	0	3	0	-1	2	0	-1	1	0	1	13	12	16	24	4	13	6	3
PF01337	Barstar	Barstar (barnase inhibitor)	0	0	0	5	0	0	0	1	0	4	0	0	0	0.422222	0	0.461165	FALSE	-0.303574	FALSE		0	0	0	0	0	0	0	0	0	0	0	0	0	0	0	0	0	0	0	0	0	0	0	0	-1	0	0
PF01339	CheB_methylest	CheB methylesterase	0	0	3	10	0	1	0	4	2	4	0	1.48026	0.168889	0.675556	0.184466	0.168464	-0.175508	0.166546	-0.342054		0	0	0	0	0	0	0	0	0	0	0	0	0	0	0	0	0	0	0	0	0	0	0	0	0	0	0
PF01341	Glyco_hydro_6	Glycosyl hydrolases family 6	4	5	21	27	2	3	1	3	20	24	1.12782	1.31579	1.77333	2.28	0.0313929	0.24607	0.0658215	0.207709	-0.141888		-1	1	0	-1	0	0	0	0	-1	1	-1	0	-1	2	0	0	2	0	0	5	-4	-1	1	-3	0	0	0
PF01342	SAND	SAND domain	0	0	0	0	0	0	0	0	0	0	0	0	0	0	0	0	FALSE	FALSE	FALSE		0	0	0	0	0	0	0	0	0	0	0	0	0	0	0	0	0	0	0	0	0	0	0	0	0	0	0
PF01343	Peptidase_S49	Peptidase family S49	3	4	57	54	4	5	7	3	48	46	0.861244	1.20838	4.64444	4.13778	0.0970611	0.194578	-0.121831	0.181027	-0.302858		0	0	1	2	0	0	0	0	0	0	-1	0	-1	1	-1	0	-1	0	0	1	-3	0	1	-3	0	0	1
PF01344	Kelch_1	Kelch motif	8	8	192	22	13	4	20	0	157	25	0.869759	1.89474	14.9467	2.11111	0.275183	1.82275	-0.221939	0.75206	-0.973999		-5	-7	-5	9	1	12	-2	1	-1	1	-2	-3	1	9	-3	0	34	0	0	79	35	116	185	18	37	0	3
PF01345	DUF11	Domain of unknown function DUF11	0	0	5	30	0	4	0	4	5	21	0	1.89474	0.422222	2.11111	0.461165	1.82275	-0.303574	0.75206	-1.05563		0	0	0	0	0	0	0	0	0	0	0	0	0	0	0	0	0	0	0	0	-1	0	-1	-1	0	0	0
PF01346	FKBP_N	Domain amino terminal to FKBP-type peptidyl-prolyl isomerase	4	5	46	63	2	6	5	2	41	56	0.514874	1.22505	3.88444	4.89778	0.994689	0.268606	-0.496755	0.21877	-0.715526		1	0	0	5	0	-1	0	-1	0	0	0	1	-2	-1	0	0	0	1	-1	1	0	0	10	-4	0	1	-1
PF01347	Vitellogenin_N	Lipoprotein amino terminal region	0	0	2	2	0	0	0	0	1	2	0	0	0.0844444	0.168889	0.092233	0.184466	-0.118411	-0.175508	0.0570963		0	0	0	0	0	0	0	0	0	0	0	0	0	0	0	0	0	0	0	0	0	0	0	0	0	0	0
PF01348	Intron_maturas2	Type II intron maturase	0	0	0	15	0	1	0	1	0	13	0	0.845865	0	1.18222	0	0.0304899	FALSE	-0.0648036	FALSE		0	0	0	0	0	0	0	0	0	0	0	0	0	0	0	0	0	0	0	0	0	0	0	0	0	0	0
PF01351	RNase_HII	Ribonuclease HII	3	4	41	60	4	5	5	4	34	52	1.21457	1.05733	3.29333	4.72889	0.16421	0.0168492	0.164113	0.0473426	0.11677		-1	-1	0	2	0	1	0	0	-1	0	1	0	0	0	0	0	-1	0	0	0	-2	0	0	-2	0	0	2
PF01352	KRAB	KRAB box	0	0	0	0	0	0	0	0	0	0	0	0	0	0	0	0	FALSE	FALSE	FALSE		0	0	0	0	0	0	0	0	0	0	0	0	0	0	0	0	0	0	0	0	0	0	0	0	0	0	0
PF01357	Expansin_C	Expansin C-terminal domain	0	0	1	6	0	1	0	1	1	4	0	2.36842	0.0844444	0.422222	0.092233	0.850493	-0.118411	0.448046	-0.566458		0	0	0	0	0	0	0	0	0	0	0	0	0	0	0	0	0	0	0	0	0	0	0	0	0	0	0
PF01358	PARP_regulatory	Poly A polymerase regulatory subunit	1	2	9	20	0	3	0	0	8	19	0	1.86981	0.675556	1.60444	0.737864	1.30935	-0.40855	0.597718	-1.00627		0	0	-1	0	0	2	0	0	0	0	-1	0	0	0	0	0	0	0	0	0	-2	0	2	-1	0	0	0
PF01360	0	0	0	0	0	0	0	0	0	0	0	0	0	0	0	0	0	0	FALSE	FALSE	FALSE		0	0	0	0	0	0	0	0	0	0	0	0	0	0	0	0	0	0	0	0	0	0	0	0	0	0	0
PF01361	Tautomerase	Tautomerase enzyme	0	0	1	17	0	2	0	1	1	12	0	1.82186	0.0844444	1.09778	0.092233	0.800055	-0.118411	0.430536	-0.548947		0	0	0	0	0	0	0	0	0	0	0	0	0	0	0	0	0	0	0	0	0	0	0	0	0	0	0
PF01363	FYVE	FYVE zinc finger	6	7	162	36	12	1	17	3	130	37	0.966702	0.296053	12.4133	3.37778	0.0149285	1.82411	-0.0444302	-0.752457	0.708026		0	0	3	2	1	-1	0	0	-2	2	19	-3	-2	1	-2	0	-1	-1	0	2	3	7	9	0	14	4	6
PF01364	Peptidase_C25	Peptidase family C25	0	2	2	13	0	2	0	2	2	11	0	1.82186	0.168889	1.09778	0.184466	0.800055	-0.175508	0.430536	-0.606044		0	0	0	-1	0	0	0	0	0	0	0	0	-1	0	0	0	0	0	0	0	0	0	0	0	0	0	0
PF01365	RYDR_ITPR	RIH domain	2	4	22	37	5	3	2	2	14	31	3.70066	1.07656	1.35111	2.78667	10.532	0.017702	2.93061	0.0485873	2.88203		0	0	1	-1	0	0	0	0	0	0	5	0	-1	-1	0	0	-1	0	0	0	0	0	-1	0	0	0	0
PF01367	5_3_exonuc	5'-3' exonuclease, C-terminal SAM fold	0	3	50	51	7	4	3	4	39	43	1.97368	1.00784	3.54667	3.96889	3.62482	0.000264452	1.24471	0.00567168	1.23904		-1	0	0	-1	0	0	0	0	0	0	0	0	-1	0	0	0	0	0	0	0	-1	0	2	-2	0	0	0
PF01368	DHH	DHH family	4	3	50	61	8	5	8	4	36	50	2.15311	1.09649	3.71556	4.56	5.32061	0.0460123	1.67624	0.0808417	1.5954		0	0	0	4	0	0	0	0	1	0	2	0	-1	0	-1	0	-1	0	1	1	0	6	0	-3	0	0	0
PF01369	Sec7	Sec7 domain	5	3	162	24	13	2	14	4	132	19	1.05443	1.02975	12.3289	1.94222	0.039602	0.00186357	0.0745535	0.0152177	0.0593358		0	-1	-1	4	0	2	0	0	0	0	2	0	-1	0	0	0	9	1	0	8	5	18	21	2	15	6	5
PF01370	Epimerase	NAD dependent epimerase/dehydratase family	9	10	134	89	5	14	14	5	116	77	0.455466	2.02182	10.9778	6.92444	3.54323	7.792	-1.22338	2.28002	-3.5034		3	-13	-4	28	5	5	-5	4	2	-2	-8	1	-9	-3	-1	-5	5	3	-2	40	0	29	76	-23	3	3	8
PF01373	Glyco_hydro_14	Glycosyl hydrolase family 14	1	0	25	21	1	0	0	1	24	18	0.493421	0	2.02667	1.60444	0.565969	1.75243	-0.344991	-0.731488	0.386497		0	0	0	0	0	0	0	0	0	0	0	0	0	0	0	0	3	0	0	7	1	-1	0	-3	0	0	0
PF01379	Porphobil_deam	Porphobilinogen deaminase, dipyromethane cofactor binding domain	1	0	35	19	0	1	3	0	33	15	0	0.789474	3.04	1.26667	3.32039	0.0609669	-1.16478	-0.094218	-1.07056		1	0	0	0	0	0	0	0	0	0	0	0	0	0	0	0	0	0	0	0	-2	2	3	-1	0	0	0
PF01380	SIS	SIS domain	0	5	37	31	0	4	3	1	33	29	0	1.57895	3.04	2.53333	3.32039	0.917484	-1.16478	0.470908	-1.63569		0	-1	0	0	-1	0	0	0	0	0	-1	0	0	0	-1	0	-1	0	0	0	0	0	2	0	0	0	-1
PF01381	HTH_3	Helix-turn-helix	2	1	50	42	2	4	1	2	46	34	0.503919	1.31579	3.96889	3.04	1.06281	0.328093	-0.519168	0.246582	-0.76575		0	0	0	0	0	1	0	0	-1	0	0	0	0	0	0	0	0	0	1	-1	2	0	0	0	0	0	1
PF01384	PHO4	Phosphate transporter family	6	6	42	66	6	3	4	2	36	61	1.77632	0.56391	3.37778	5.32	2.197	1.10043	0.859241	-0.531399	1.39064		-1	-2	0	4	0	2	0	0	0	0	2	1	-1	2	0	-1	-2	-1	1	-1	-1	0	0	0	0	0	0
PF01385	OrfB_IS605	Probable transposase	0	0	0	0	0	0	0	0	0	0	0	0	0	0	0	0	FALSE	FALSE	FALSE		0	0	0	0	0	0	0	0	0	0	0	0	0	0	0	0	0	0	0	0	0	0	0	0	0	0	0
PF01386	Ribosomal_L25p	Ribosomal L25p family	0	4	11	40	0	3	0	5	11	36	0	0.866496	0.928889	3.46222	1.01456	0.0669791	-0.50333	-0.0992031	-0.404127		-1	0	0	-1	0	-1	0	0	0	0	0	0	0	0	0	0	-1	0	0	0	0	0	0	0	0	0	0
PF01388	ARID	ARID/BRIGHT DNA binding domain	4	3	23	29	3	3	3	1	20	25	1.54462	1.3664	1.94222	2.19556	0.622598	0.318889	0.366447	0.242394	0.124053		0	1	-1	0	0	1	2	0	0	1	-1	0	0	0	0	0	-1	0	0	0	0	0	0	0	0	0	0
PF01391	Collagen	Collagen triple helix repeat (20 copies)	4	6	19	49	2	5	4	4	16	42	1.18421	1.28719	1.68889	3.88444	0.0620753	0.346784	0.0951518	0.254973	-0.159821		-2	0	-1	0	0	17	-1	0	-1	0	0	-1	0	2	0	0	6	4	-2	0	-1	0	-1	0	0	0	0
PF01392	Fz	Fz domain	2	4	7	38	2	5	1	2	5	34	3.94737	1.64474	0.506667	3.04	4.69901	1.36489	1.52028	0.614944	0.905337		0	-1	-2	0	0	4	0	0	0	0	1	-1	-1	0	0	0	0	0	0	0	0	0	2	0	0	0	0
PF01393	Chromo_shadow	Chromo shadow domain	0	0	0	0	0	0	0	0	0	0	0	0	0	0	0	0	FALSE	FALSE	FALSE		0	0	0	0	0	0	0	0	0	0	0	0	0	0	0	0	0	0	0	0	0	0	0	0	0	0	0
PF01394	Clathrin_propel	Clathrin propeller repeat	1	6	24	32	3	1	2	2	20	32	1.61483	0.348297	1.85778	2.87111	0.758652	1.32838	0.415951	-0.603637	1.01959		0	0	0	-2	-1	0	0	0	0	0	-1	0	1	0	-1	0	-1	-1	0	0	-2	1	1	0	0	0	0
PF01396	zf-C4_Topoisom	Topoisomerase DNA binding C4 zinc finger	2	3	6	31	1	2	1	4	6	28	1.69173	0.740132	0.591111	2.70222	0.305407	0.198241	0.236188	-0.183001	0.419189		0	-1	0	1	0	-1	-1	0	0	0	0	0	0	0	0	0	1	0	0	0	0	0	0	0	0	0	0
PF01398	JAB	JAB1/Mov34/MPN/PAD-1 ubiquitin protease	6	6	72	71	5	7	9	4	60	63	0.858124	1.23723	5.82667	5.65778	0.127309	0.344783	-0.141921	0.254081	-0.396002		2	-1	-1	1	0	1	0	0	0	0	1	-1	0	-2	-2	1	-2	0	1	2	0	-1	12	-2	-2	0	-1
PF01399	PCI	PCI domain	8	8	173	28	12	4	17	1	143	29	0.888158	1.57895	13.5111	2.53333	0.183414	0.917484	-0.174927	0.470908	-0.645835		-2	-1	-4	0	1	4	0	1	1	-1	-2	2	0	2	2	-1	-4	-2	2	18	14	13	49	11	17	9	11
PF01400	Astacin	Astacin (Peptidase family M12A)	2	3	31	36	1	4	2	4	29	27	0.382003	1.52801	2.61778	2.61778	1.08886	0.788832	-0.527646	0.426602	-0.954248		0	0	0	5	0	0	0	0	0	0	-1	0	-1	0	0	0	8	-1	0	13	0	1	-5	-10	1	1	-1
PF01401	Peptidase_M2	Angiotensin-converting enzyme	0	0	1	9	0	1	0	3	1	4	0	1.69173	0.0844444	0.591111	0.092233	0.305407	-0.118411	0.236188	-0.3546		0	0	0	0	0	0	0	0	0	0	0	0	0	0	0	0	0	0	0	0	0	0	0	0	0	0	0
PF01402	RHH_1	Ribbon-helix-helix protein, copG family	0	0	2	12	0	2	0	2	1	7	0	2.63158	0.0844444	0.76	0.092233	2.17331	-0.118411	0.852561	-0.970972		0	0	0	0	0	0	0	0	0	0	0	0	0	0	0	0	0	0	0	0	0	0	0	0	0	0	0
PF01406	tRNA-synt_1e	tRNA synthetases class I (C) catalytic domain	7	5	61	74	4	7	8	7	54	60	0.764007	1.23723	5.23556	5.65778	0.316706	0.344783	-0.241395	0.254081	-0.495477		0	0	-2	3	2	3	0	0	-1	1	2	1	-2	0	-1	-1	1	0	0	3	-2	0	2	-4	2	1	-1
PF01408	GFO_IDH_MocA	Oxidoreductase family, NAD-binding Rossmann fold	5	7	163	21	9	4	14	2	137	20	0.705821	2.15311	12.7511	1.85778	1.19906	2.6603	-0.563026	0.987665	-1.55069		0	-2	-1	11	0	1	0	0	0	0	-6	-1	-2	1	-2	0	6	-3	5	20	16	22	27	1	8	5	6
PF01409	tRNA-synt_2d	tRNA synthetases class II core domain (F)	4	2	57	54	5	2	7	3	48	45	1.07656	0.493421	4.64444	4.05333	0.0295033	1.13194	0.0636763	-0.54157	0.605246		0	0	0	0	0	1	0	0	0	0	1	0	-1	0	1	-1	1	0	0	2	-2	0	7	-1	0	1	0
PF01411	tRNA-synt_2c	tRNA synthetases class II (A)	2	6	65	51	2	5	6	4	56	44	0.382003	1.23355	5.23556	4.05333	2.17771	0.239406	-0.853802	0.204373	-1.05818		-1	-2	0	2	-1	-1	0	0	0	0	0	-1	0	2	0	0	-1	0	0	2	-1	0	4	-1	1	0	1
PF01412	ArfGap	Putative GTPase activating protein for Arf	5	8	175	35	12	4	17	4	142	33	0.893744	1.28023	13.4267	3.12444	0.164509	0.265595	-0.164285	0.217311	-0.381596		0	-4	-3	9	5	1	0	0	-1	0	-3	0	-2	0	-2	-1	7	1	-1	15	9	24	34	5	24	10	8
PF01414	DSL	Delta serrate ligand	0	0	2	10	0	2	0	1	2	7	0	2.96053	0.168889	0.675556	0.184466	2.78473	-0.175508	1.02152	-1.19702		0	0	0	0	0	0	0	0	0	0	0	0	0	0	0	0	0	0	0	0	0	0	0	0	0	0	0
PF01416	PseudoU_synth_1	tRNA pseudouridine synthase	6	3	78	80	7	5	9	6	63	69	1.15132	0.789474	6.08	6.33333	0.150818	0.304834	0.156297	-0.235923	0.39222		0	-2	0	5	2	1	0	0	0	0	2	0	-2	-1	0	0	1	0	1	0	-3	5	6	-2	1	0	3
PF01417	ENTH	ENTH domain	4	6	57	56	5	4	5	7	49	47	1.09649	0.877193	4.56	4.56	0.0460123	0.0746402	0.0808417	-0.105298	0.18614		-1	-1	0	2	0	0	0	-1	0	0	0	-1	1	0	-1	1	1	-1	0	1	-7	2	1	-7	1	0	0
PF01418	HTH_6	Helix-turn-helix domain, rpiR family	0	0	1	14	0	2	0	1	1	11	0	1.97368	0.0844444	1.01333	0.092233	1.03566	-0.118411	0.510278	-0.628689		0	0	0	0	0	0	0	0	0	0	0	0	0	0	0	0	0	0	0	0	0	0	0	0	0	0	0
PF01419	Jacalin	Jacalin-like lectin domain	1	4	20	41	0	6	2	6	16	33	0	1.82186	1.52	3.29333	1.66019	2.40016	-0.704263	0.916058	-1.62032		0	-1	0	0	-1	0	0	0	0	0	-1	0	0	0	-1	0	1	0	0	0	-1	0	0	0	0	0	-1
PF01421	Reprolysin	Reprolysin (M12B) family zinc metalloprotease	1	3	22	37	0	6	4	2	17	30	0	2.22039	1.77333	2.70222	1.93689	4.33269	-0.78514	1.42728	-2.21242		0	0	0	0	0	0	0	3	-1	0	-1	-1	0	0	0	0	0	0	0	0	0	0	1	0	5	-1	0
PF01422	zf-NF-X1	NF-X1 type zinc finger	0	0	0	5	0	0	0	0	0	5	0	0	0	0.422222	0	0.461165	FALSE	-0.303574	FALSE		0	0	0	0	0	0	0	0	0	0	0	0	0	0	0	0	0	0	0	0	0	0	0	0	0	0	0
PF01423	LSM	LSM domain	7	8	234	0	17	2	21	0	193	6	0.940728	3.94737	18.0711	0.506667	0.068875	4.69901	-0.100737	1.52028	-1.62102		-1	-5	-1	5	2	0	0	0	-2	2	2	1	-1	1	0	-1	-2	1	-2	39	25	38	60	25	24	8	12
PF01424	R3H	R3H domain	7	5	61	63	6	6	5	6	54	52	1.20428	1.22505	4.98222	4.89778	0.225173	0.268606	0.19714	0.21877	-0.0216301		0	-1	0	4	-1	1	1	0	0	0	1	-1	-1	1	0	0	7	2	-2	0	-3	3	5	-1	-2	1	0
PF01425	Amidase	Amidase	5	4	59	69	4	11	9	3	47	55	0.845865	2.24592	4.72889	4.89778	0.12196	8.18376	-0.138514	2.374	-2.51251		0	-2	0	7	2	0	0	0	1	0	-3	0	-2	1	0	0	4	0	-2	1	0	0	7	-4	0	1	0
PF01426	BAH	BAH domain	2	7	36	57	2	5	4	7	32	50	0.657895	1.03878	3.04	4.81333	0.386728	0.00784846	-0.272439	0.0317943	-0.304233		0	2	-4	-1	0	6	-1	0	-1	0	-1	0	-1	0	0	0	-1	0	0	0	0	0	0	0	0	0	0
PF01427	Peptidase_M15	D-ala-D-ala dipeptidase	0	0	0	10	0	1	0	1	0	8	0	1.31579	0	0.76	0	0.0820232	FALSE	0.110937	FALSE		0	0	0	0	0	0	0	0	0	0	0	0	0	0	0	0	0	0	0	0	0	0	0	0	0	0	0
PF01428	zf-AN1	AN1-like Zinc finger	4	3	24	39	2	3	0	4	22	33	1.07656	0.960171	1.85778	3.12444	0.0118013	0.0053765	0.0392949	-0.0261576	0.0654525		0	0	0	-1	0	3	1	0	1	-1	0	-1	0	0	0	0	5	0	0	0	-2	0	3	-4	0	0	0
PF01429	MBD	Methyl-CpG binding domain	4	4	52	64	2	7	5	6	48	55	0.446872	1.35893	4.47556	5.15111	1.49059	0.718013	-0.653404	0.401432	-1.05484		3	0	0	7	-1	0	1	0	0	0	0	0	-2	-1	-2	1	0	0	0	2	-2	0	2	-2	0	0	1
PF01430	HSP33	Hsp33 protein	2	3	19	46	1	1	2	2	18	43	0.592105	0.263158	1.68889	3.8	0.305569	2.24894	-0.236264	-0.873849	0.637586		0	0	-1	1	0	0	0	0	0	0	1	0	0	0	0	0	-1	-1	0	0	0	0	1	0	0	0	0
PF01431	Peptidase_M13	Peptidase family M13	1	4	31	46	1	2	4	0	26	45	0.394737	0.526316	2.53333	3.8	1.01066	0.927632	-0.502042	-0.474335	-0.0277076		0	-1	0	0	0	4	0	0	0	0	0	-1	0	0	0	0	-1	-1	0	0	-1	-1	2	-1	0	0	-1
PF01432	Peptidase_M3	Peptidase family M3	5	3	163	21	12	1	16	2	131	19	0.966702	0.56391	12.4133	1.77333	0.0149285	0.36681	-0.0444302	-0.263804	0.219374		0	-1	1	3	1	0	0	0	0	0	0	0	-1	0	-1	0	4	1	0	11	8	11	19	3	6	7	7
PF01433	Peptidase_M1	Peptidase family M1 domain	5	3	65	68	1	7	10	3	58	58	0.174149	1.35893	5.74222	5.15111	4.27188	0.718013	-1.41175	0.401432	-1.81318		0	0	0	2	0	1	0	-1	1	0	0	1	-1	0	0	-1	4	0	0	3	-2	0	2	-4	2	0	0
PF01434	Peptidase_M41	Peptidase family M41	3	5	172	23	12	2	15	1	139	23	0.922761	0.986842	13.0044	2.02667	0.0841762	0.00038054	-0.112543	-0.00681238	-0.10573		-1	-1	0	1	0	0	0	0	0	-1	-1	0	0	1	-1	0	11	0	0	16	9	11	30	5	11	7	7
PF01435	Peptidase_M48	Peptidase family M48	4	4	51	63	1	6	5	5	48	51	0.223436	1.2688	4.47556	4.72889	2.9429	0.369883	-1.06421	0.265146	-1.32936		0	-1	0	4	0	1	0	0	0	0	0	-2	0	1	-1	0	-2	0	1	1	-1	0	1	-2	0	-1	1
PF01436	NHL	NHL repeat	5	6	125	31	13	2	10	4	99	29	1.41236	0.717703	9.20444	2.78667	1.69286	0.241284	0.713938	-0.205317	0.919255		0	-3	3	26	0	0	0	-1	-1	1	-1	0	-11	1	0	0	7	-1	0	13	10	29	31	1	12	0	0
PF01437	PSI	Plexin repeat	0	1	10	41	0	2	1	4	8	34	0	0.623269	0.76	3.20889	0.830097	0.495148	-0.440998	-0.317278	-0.123721		0	0	0	0	0	-1	0	0	0	0	0	0	0	0	0	0	0	0	0	0	0	0	0	-1	0	0	0
PF01439	Metallothio_2	Metallothionein	0	0	0	0	0	0	0	0	0	0	0	0	0	0	0	0	FALSE	FALSE	FALSE		0	0	0	0	0	0	0	0	0	0	0	0	0	0	0	0	0	0	0	0	0	0	0	0	0	0	0
PF01442	Apolipoprotein	Apolipoprotein A1/A4/E domain	0	0	34	50	2	3	1	5	29	39	0.789474	0.807416	2.53333	3.71556	0.121934	0.149634	-0.138498	-0.155594	0.0170962		0	0	0	0	0	0	0	0	0	0	0	0	0	0	0	0	0	0	0	-2	-1	2	0	0	1	0	0
PF01443	Viral_helicase1	Viral (Superfamily 1) RNA helicase	7	4	63	73	10	8	8	5	50	60	2.04174	1.45749	4.89778	5.48889	5.72775	1.24221	1.77731	0.576679	1.20063		0	0	-1	0	2	1	0	1	0	-1	2	-1	1	1	-1	0	2	0	0	0	-5	1	5	-5	2	3	0
PF01445	SH	Viral small hydrophobic protein	0	0	0	0	0	0	0	0	0	0	0	0	0	0	0	0	FALSE	FALSE	FALSE		0	0	0	0	0	0	0	0	0	0	0	0	0	0	0	0	0	0	0	0	0	0	0	0	0	0	0
PF01446	Rep_1	Replication protein	0	0	0	0	0	0	0	0	0	0	0	0	0	0	0	0	FALSE	FALSE	FALSE		0	0	0	0	0	0	0	0	0	0	0	0	0	0	0	0	0	0	0	0	0	0	0	0	0	0	0
PF01447	Peptidase_M4	Thermolysin metallopeptidase, catalytic domain	0	0	4	8	0	1	0	2	4	5	0	1.69173	0.337778	0.591111	0.368932	0.305407	-0.264731	0.236188	-0.500919		0	0	0	0	0	0	0	0	0	0	0	0	0	0	0	0	0	0	0	0	0	0	0	0	0	0	0
PF01448	ELM2	ELM2 domain	0	0	4	23	0	2	0	4	4	15	0	1.24654	0.337778	1.60444	0.368932	0.105586	-0.264731	0.127712	-0.392443		0	0	0	0	0	0	0	0	0	0	0	0	0	0	0	0	0	0	0	0	0	0	0	0	0	1	0
PF01450	IlvC	Acetohydroxy acid isomeroreductase, catalytic domain	1	1	30	28	2	1	2	0	26	23	0.845865	0.514874	2.36444	1.94222	0.0609799	0.497344	-0.094229	-0.318154	0.223925		0	0	0	-1	0	0	0	0	0	0	3	0	0	0	0	0	0	0	0	1	-1	9	0	-3	0	0	1
PF01451	LMWPc	Low molecular weight phosphotyrosine protein phosphatase	2	2	30	36	3	3	2	2	23	33	1.42105	1.01504	2.11111	2.95556	0.404789	0.000724703	0.28015	0.00942883	0.270721		0	0	0	0	0	0	0	0	0	0	0	0	-1	1	0	0	0	1	-1	0	-1	0	0	0	0	0	0
PF01453	B_lectin	D-mannose binding lectin	4	4	36	51	5	5	6	6	27	43	1.79426	1.20838	2.78667	4.13778	1.89708	0.194578	0.773643	0.181027	0.592616		0	0	4	0	1	-1	0	0	0	0	-1	0	0	0	-1	0	1	3	-1	1	-1	1	1	-1	0	0	-1
PF01454	MAGE	MAGE family	1	2	14	42	1	4	2	3	12	35	0.845865	1.24654	1.18222	3.20889	0.0304899	0.211172	-0.0648036	0.189868	-0.254672		-1	0	0	1	0	0	0	0	0	0	0	0	0	0	0	0	-1	0	0	0	0	0	0	0	0	-1	0
PF01456	Mucin	Mucin-like glycoprotein	0	0	6	33	0	1	0	3	6	25	0	0.422932	0.506667	2.36444	0.553398	0.857272	-0.340148	-0.45038	0.110232		0	0	0	0	0	0	0	0	0	0	0	0	0	0	0	0	0	0	0	0	0	0	0	0	-1	-1	0
PF01457	Peptidase_M8	Leishmanolysin	6	2	52	63	3	6	7	4	45	52	0.683198	1.2688	4.39111	4.72889	0.478944	0.369883	-0.310779	0.265146	-0.575925		0	0	2	1	2	-1	0	0	0	1	-1	0	0	0	0	0	2	0	3	0	-1	-1	4	0	0	0	6
PF01458	SUFBD	SUF system FeS cluster assembly, SufBD	4	1	25	39	0	2	2	3	26	30	0	0.717703	2.36444	2.78667	2.58252	0.241284	-0.966378	-0.205317	-0.761062		0	0	0	1	0	0	0	0	1	0	0	0	-1	0	0	0	2	1	0	1	0	-1	1	0	0	0	0
PF01459	Porin_3	Eukaryotic porin	4	1	41	44	5	3	5	2	33	37	1.55817	0.910931	3.20889	3.29333	1.08037	0.0283498	0.524889	-0.0623372	0.587226		0	0	1	0	0	0	0	1	0	1	1	-1	0	0	0	0	0	0	0	0	0	3	4	-4	0	0	1
PF01462	LRRNT	Leucine rich repeat N-terminal domain	0	0	0	1	0	0	0	0	0	1	0	0	0	0.0844444	0	0.092233	FALSE	-0.118411	FALSE		0	0	0	0	0	0	0	0	0	0	0	0	0	0	0	0	0	0	0	0	0	0	0	0	0	0	0
PF01464	SLT	Transglycosylase SLT domain	1	1	8	37	1	3	0	5	6	28	1.97368	1.07656	0.506667	2.78667	0.517832	0.017702	0.326272	0.0485873	0.277684		0	0	0	0	0	-1	0	0	0	0	1	0	0	0	0	0	0	0	0	0	0	0	0	0	0	0	0
PF01465	GRIP	GRIP domain	3	3	51	50	3	3	0	4	49	43	0.725027	0.755879	4.13778	3.96889	0.339906	0.25692	-0.251902	-0.213075	-0.0388268		0	0	0	2	0	0	0	1	1	0	0	-2	0	0	0	-1	-2	0	0	1	0	0	0	-2	0	0	0
PF01466	Skp1	Skp1 family, dimerisation domain	2	2	59	71	3	6	3	4	51	59	0.657895	1.12782	4.56	5.32	0.580092	0.0941786	-0.350396	0.119798	-0.470194		0	-1	0	0	0	0	0	0	-1	0	0	0	0	0	0	1	1	0	0	3	3	-2	9	-7	-1	-1	0
PF01467	CTP_transf_like	Cytidylyltransferase-like	8	6	164	26	10	4	15	4	138	23	0.773994	1.75439	12.92	2.28	0.71675	1.40055	-0.400978	0.625928	-1.02691		0	-1	0	3	-1	1	1	0	1	-1	-2	0	0	-1	1	2	10	-1	1	13	11	20	24	5	15	4	6
PF01469	Pentapeptide_2	Pentapeptide repeats (8 copies)	0	0	3	25	1	1	0	3	1	19	11.8421	0.538278	0.0844444	1.85778	10.3641	0.430857	2.89114	-0.291096	3.18224		0	0	0	0	0	0	0	0	0	0	0	0	0	0	0	0	0	0	0	0	0	0	0	0	0	0	0
PF01470	Peptidase_C15	Pyroglutamyl peptidase	3	6	18	54	1	6	2	5	17	46	0.623269	1.39319	1.60444	4.30667	0.247574	0.720216	-0.208458	0.402225	-0.610683		0	-1	0	2	2	0	0	0	-1	0	0	0	-1	-1	0	-1	1	-1	0	0	0	-1	0	-2	0	0	0
PF01471	PG_binding_1	Putative peptidoglycan binding domain	3	2	38	64	2	5	0	7	37	50	0.640114	1.03878	3.12444	4.81333	0.439915	0.00784846	-0.294852	0.0317943	-0.326646		-1	0	0	0	0	0	1	0	0	0	0	0	-2	1	0	0	1	0	0	0	-2	1	2	-1	0	0	0
PF01472	PUA	PUA domain	2	4	52	50	5	4	5	3	41	44	1.28719	1.00784	3.88444	3.96889	0.346784	0.000264452	0.254973	0.00567168	0.249301		-1	0	-1	1	0	0	0	0	0	0	1	0	0	0	-1	0	0	-1	0	1	-1	0	3	-2	-1	0	1
PF01474	DAHP_synth_2	Class-II DAHP synthetase family	2	0	38	33	0	2	3	1	36	27	0	0.845865	3.29333	2.36444	3.59709	0.0609799	-1.23746	-0.094229	-1.14324		0	0	0	0	0	0	0	0	0	0	0	0	0	0	0	0	1	0	1	0	-1	2	4	0	0	0	2
PF01475	FUR	Ferric uptake regulator family	0	0	3	15	0	3	0	4	3	7	0	3.22967	0.253333	0.928889	0.276699	4.94605	-0.222665	1.58252	-1.80519		0	0	0	0	0	0	0	0	0	0	0	0	0	0	0	0	0	0	0	0	0	0	0	0	0	0	0
PF01476	LysM	LysM domain	2	8	40	65	1	9	5	11	34	50	0.303644	1.7472	3.29333	5.15111	1.74026	3.10431	-0.727912	1.10743	-1.83534		0	-1	-6	0	-1	22	0	-1	1	0	-1	0	0	-1	-1	0	0	-1	0	0	0	0	0	0	0	0	0
PF01477	PLAT	PLAT/LH2 domain	2	2	25	44	2	5	2	7	21	31	1.02975	1.55817	1.94222	3.20889	0.00186357	1.08037	0.0152177	0.524889	-0.509671		0	0	-1	0	0	2	1	0	0	0	0	-1	0	0	0	0	0	0	0	0	0	0	1	0	0	0	0
PF01479	S4	S4 domain	8	5	168	29	13	2	15	3	140	27	0.993209	0.789474	13.0889	2.53333	0.000654665	0.121934	-0.00895689	-0.138498	0.129541		0	-3	-2	8	-1	1	1	0	0	1	4	-1	-1	0	1	1	1	0	0	11	6	8	25	5	7	5	2
PF01480	PWI	PWI domain	4	7	41	52	2	5	3	5	38	44	0.577664	1.20838	3.46222	4.13778	0.671627	0.194578	-0.384592	0.181027	-0.565618		-1	0	0	2	-1	0	1	0	-1	0	1	-1	-1	0	-1	0	0	-1	2	1	0	0	1	0	-1	-1	0
PF01483	P_proprotein	Proprotein convertase P-domain	3	5	16	43	0	7	2	4	16	37	0	2.02182	1.52	3.46222	1.66019	3.896	-0.704263	1.31514	-2.01941		3	4	0	0	3	-1	0	0	0	0	-1	0	-1	-1	-1	0	0	0	0	0	0	0	0	0	0	0	0
PF01485	IBR	IBR domain, a half RING-finger domain	7	7	165	28	11	3	17	3	136	27	0.851393	1.18421	12.92	2.53333	0.309725	0.093113	-0.238186	0.11904	-0.357226		1	-3	-3	8	5	9	0	0	-1	1	2	0	-1	-1	-3	0	8	-2	0	15	5	27	32	3	15	5	7
PF01486	K-box	K-box region	0	0	0	10	0	1	0	1	0	7	0	1.48026	0	0.675556	0	0.168464	FALSE	0.166546	FALSE		0	0	0	0	0	0	0	0	0	0	0	0	0	0	0	0	0	0	0	0	0	0	0	0	0	0	0
PF01487	DHquinase_I	Type I 3-dehydroquinase	1	2	22	45	0	3	2	2	21	39	0	0.866496	1.94222	3.46222	2.12136	0.0669791	-0.837861	-0.0992031	-0.738658		0	0	0	0	0	1	0	0	0	0	-1	0	0	0	-1	0	0	0	0	0	-1	0	0	0	0	0	0
PF01488	Shikimate_DH	Shikimate / quinate 5-dehydrogenase	6	4	59	52	2	7	5	3	56	43	0.388266	1.80206	5.15111	3.88444	2.09929	2.69649	-0.831598	0.997534	-1.82913		-1	0	-1	1	0	2	0	0	-1	1	-2	0	0	1	1	0	1	0	0	0	-4	1	8	-5	0	0	2
PF01490	Aa_trans	Transmembrane amino acid transporter protein	6	11	134	84	4	14	13	8	116	69	0.367197	2.15311	10.8933	6.50222	4.75127	9.31107	-1.53348	2.6425	-4.17598		1	-9	-4	42	14	4	-1	0	-2	0	-3	-1	-10	-1	-6	-5	46	4	-5	11	-7	27	36	-30	9	0	6
PF01491	Frataxin_Cyay	Frataxin-like domain	2	6	18	59	3	6	4	3	13	51	2.08978	1.31579	1.43556	4.56	1.83674	0.492139	0.756136	0.316076	0.44006		0	-1	-1	1	0	0	0	0	0	0	1	0	0	-1	-1	0	-1	0	-1	0	-1	0	0	-1	0	0	0
PF01493	GXGXG	GXGXG motif	3	2	40	43	5	3	3	4	34	34	1.60028	0.934903	3.12444	3.20889	1.21635	0.0147527	0.568512	-0.0441553	0.612667		0	0	1	0	0	0	0	0	0	0	1	-1	1	0	0	0	-1	0	0	0	-2	1	2	-1	0	0	0
PF01494	FAD_binding_3	FAD binding domain	6	9	235	0	15	3	21	0	195	6	0.822368	5.92105	18.24	0.506667	0.624866	13.0018	-0.367295	3.50697	-3.87426		2	-8	0	19	11	-1	0	2	0	0	-5	-2	-5	-2	-7	-3	16	2	-3	24	10	30	37	6	22	11	15
PF01495	0	0	0	0	0	0	0	0	0	0	0	0	0	0	0	0	0	0	FALSE	FALSE	FALSE		0	0	0	0	0	0	0	0	0	0	0	0	0	0	0	0	0	0	0	0	0	0	0	0	0	0	0
PF01496	V_ATPase_I	V-type ATPase 116kDa subunit family	5	4	48	34	5	5	5	2	40	28	1.31579	1.97368	3.8	2.53333	0.410116	2.58916	0.282404	0.968198	-0.685794		0	-1	2	1	0	0	0	0	0	0	1	0	2	-1	-1	0	2	0	-1	8	0	-1	-1	-2	-1	0	0
PF01497	Peripla_BP_2	Periplasmic binding protein	3	4	51	74	5	6	9	3	39	67	1.23355	1.01504	4.05333	5.91111	0.239406	0.00144941	0.204373	0.0133935	0.19098		0	-2	0	3	5	0	0	0	0	0	1	0	0	-1	-1	0	-1	0	0	0	-2	1	1	0	0	0	1
PF01498	HTH_Tnp_Tc3_2	Transposase	0	0	4	26	0	2	0	4	4	19	0	1.02975	0.337778	1.94222	0.368932	0.00186357	-0.264731	0.0152177	-0.279949		0	0	0	0	0	0	0	0	0	0	0	0	0	0	0	0	0	0	0	0	0	0	0	0	0	0	0
PF01501	Glyco_transf_8	Glycosyl transferase family 8	5	5	74	101	1	12	8	9	65	80	0.162221	1.59669	6.16444	7.51556	4.71984	2.89093	-1.52554	1.05022	-2.57577		-2	0	-3	9	0	5	-1	0	0	0	0	0	-7	4	0	0	18	3	-3	11	4	-6	13	-26	2	0	1
PF01502	PRA-CH	Phosphoribosyl-AMP cyclohydrolase	2	2	22	46	1	4	4	1	18	39	0.538278	1.18421	1.85778	3.37778	0.430857	0.124151	-0.291096	0.139916	-0.431012		0	0	-1	1	1	0	0	0	0	0	0	0	0	0	0	0	-1	0	0	0	0	0	0	0	-1	0	0
PF01503	PRA-PH	Phosphoribosyl-ATP pyrophosphohydrolase	2	3	35	44	2	4	5	1	29	37	0.696594	1.24654	2.87111	3.20889	0.287205	0.211172	-0.227666	0.189868	-0.417534		0	-1	-1	0	1	1	0	0	-1	0	0	0	0	0	0	0	0	0	0	1	0	-1	0	0	0	0	0
PF01504	PIP5K	Phosphatidylinositol-4-phosphate 5-Kinase	6	4	169	27	12	2	16	3	138	24	0.922761	0.877193	13.0044	2.28	0.0841762	0.0373201	-0.112543	-0.0722116	-0.0403311		0	-2	-1	2	0	2	1	0	0	0	4	0	2	0	-1	0	8	-1	0	19	13	20	26	6	13	3	3
PF01505	Vault	Major Vault Protein repeat domain	0	0	9	10	0	1	0	0	9	9	0	1.31579	0.76	0.76	0.830097	0.0820232	-0.440998	0.110937	-0.551935		0	0	0	0	0	0	0	0	0	0	0	0	0	0	0	0	0	0	0	0	0	0	0	0	0	0	0
PF01507	PAPS_reduct	Phosphoadenosine phosphosulfate reductase family	3	3	50	52	3	6	7	5	42	39	0.725027	1.61483	4.13778	3.71556	0.339906	1.5173	-0.251902	0.661488	-0.91339		-1	0	-1	0	0	4	0	0	0	0	-1	0	0	1	0	0	2	0	0	0	-3	9	3	-6	0	0	0
PF01508	Paramecium_SA	Paramecium surface antigen domain	0	0	0	7	0	1	0	2	0	4	0	1.97368	0	0.506667	0	0.517832	FALSE	0.326272	FALSE		0	0	0	0	0	0	0	0	0	0	0	0	0	0	0	0	0	0	0	0	0	0	0	0	0	0	0
PF01509	TruB_N	TruB family pseudouridylate synthase (N terminal domain)	3	1	38	49	4	2	7	0	28	45	1.35338	0.526316	2.95556	3.8	0.399354	0.927632	0.277841	-0.474335	0.752175		1	0	0	0	0	0	0	0	0	0	1	0	0	0	0	0	-1	1	0	0	-1	0	1	-1	-1	0	0
PF01510	Amidase_2	N-acetylmuramoyl-L-alanine amidase	1	3	3	24	0	3	0	4	4	18	0	1.61483	0.337778	1.85778	0.368932	0.758652	-0.264731	0.415951	-0.680682		0	0	-1	0	0	0	0	-1	0	0	0	-1	0	0	0	0	1	0	0	0	0	0	0	0	0	0	0
PF01512	Complex1_51K	Respiratory-chain NADH dehydrogenase 51 Kd subunit	0	3	19	29	0	4	2	1	17	26	0	1.75439	1.60444	2.28	1.75243	1.40055	-0.731488	0.625928	-1.35742		0	-1	-1	0	0	0	0	0	0	0	0	0	0	0	0	0	-1	0	0	0	0	0	3	0	0	0	0
PF01513	NAD_kinase	ATP-NAD kinase	3	6	45	53	3	7	5	4	39	43	0.807416	1.76372	3.71556	3.96889	0.149634	2.49855	-0.155594	0.943282	-1.09888		-1	-1	-1	0	0	1	0	0	0	1	0	1	-1	0	0	0	-1	-1	0	0	-2	0	1	-3	0	0	0
PF01515	PTA_PTB	Phosphate acetyl/butaryl transferase	0	1	22	42	0	6	1	5	20	31	0	1.97368	1.77333	3.04	1.93689	3.10699	-0.78514	1.10815	-1.89329		0	0	-1	0	0	0	0	0	0	0	0	0	0	0	0	0	0	0	0	0	0	0	0	0	0	0	0
PF01519	DUF16	Protein of unknown function DUF16	0	0	0	0	0	0	0	0	0	0	0	0	0	0	0	0	FALSE	FALSE	FALSE		0	0	0	0	0	0	0	0	0	0	0	0	0	0	0	0	0	0	0	0	0	0	0	0	0	0	0
PF01520	Amidase_3	N-acetylmuramoyl-L-alanine amidase	0	0	1	16	0	1	0	5	1	9	0	0.845865	0.0844444	1.18222	0.092233	0.0304899	-0.118411	-0.0648036	-0.0536079		0	0	0	0	0	0	0	0	0	0	0	0	0	0	0	0	0	0	0	0	0	0	0	0	0	0	0
PF01521	Fe-S_biosyn	Iron-sulphur cluster biosynthesis	2	2	38	54	5	3	1	3	34	46	1.69173	0.725027	2.95556	4.13778	1.52703	0.339906	0.664425	-0.251902	0.916327		0	0	0	0	0	1	0	0	0	0	0	0	1	-1	0	0	-1	0	0	0	-1	0	1	0	-1	-1	0
PF01522	Polysacc_deac_1	Polysaccharide deacetylase	4	6	42	48	5	6	3	4	34	40	1.60028	1.61483	3.12444	3.71556	1.21635	1.5173	0.568512	0.661488	-0.0929761		0	0	-1	0	1	1	0	0	-1	0	1	0	-1	-1	-1	0	5	0	-1	0	-3	2	3	-3	1	0	0
PF01523	PmbA_TldD	Putative modulator of DNA gyrase	0	0	4	18	0	2	0	4	3	11	0	1.57895	0.253333	1.26667	0.276699	0.458742	-0.222665	0.302585	-0.525251		0	0	0	0	0	0	0	0	0	0	0	0	0	0	0	0	0	0	0	0	0	0	0	0	0	0	0
PF01526	DDE_Tnp_Tn3	Tn3 transposase DDE domain	0	0	0	4	0	0	0	1	0	3	0	0	0	0.337778	0	0.368932	FALSE	-0.264731	FALSE		0	0	0	0	0	0	0	0	0	0	0	0	0	0	0	0	0	0	0	0	0	0	0	0	0	0	0
PF01527	HTH_Tnp_1	Transposase	2	4	13	36	0	6	1	5	14	28	0	2.15311	1.26667	2.78667	1.3835	3.99046	-0.620682	1.33953	-1.96021		0	0	0	2	2	0	0	0	0	0	-1	0	-1	0	-1	-1	0	0	0	0	0	0	0	0	0	-1	0
PF01529	DHHC	DHHC palmitoyltransferase	5	10	232	0	16	3	21	0	191	7	0.893744	5.07519	17.9022	0.591111	0.219346	10.4334	-0.194133	2.90743	-3.10157		-1	-3	-2	9	2	2	-1	0	-1	0	-3	-2	-5	1	-2	0	39	-1	0	64	43	75	63	11	50	6	14
PF01531	Glyco_transf_11	Glycosyl transferase family 11	1	3	15	42	2	2	3	3	9	38	1.97368	0.577664	1.01333	3.46222	1.03566	0.671627	0.510278	-0.384592	0.894869		-1	0	1	0	0	0	0	0	0	0	-1	0	0	0	0	0	0	0	-1	0	0	0	1	0	0	0	0
PF01532	Glyco_hydro_47	Glycosyl hydrolase family 47	5	7	71	71	6	7	7	7	60	61	1.06049	1.21904	5.65778	5.74222	0.0224391	0.298346	0.0550612	0.232903	-0.177842		1	-3	3	4	0	-1	0	0	-1	0	-2	-1	0	-1	-2	0	7	0	1	0	-5	1	4	-5	0	2	0
PF01534	Frizzled	Frizzled/Smoothened family membrane region	0	0	4	16	0	0	0	2	4	14	0	0	0.337778	1.35111	0.368932	1.47573	-0.264731	-0.648892	0.384161		0	0	0	0	0	0	0	0	0	0	0	0	0	0	0	0	0	0	0	0	0	0	0	0	0	0	0
PF01535	PPR	PPR repeat	7	11	0	0	1	2	1	0	5	9	1.97368	2.63158	0.506667	0.76	0.517832	2.17331	0.326272	0.852561	-0.526289		-5	-4	9	18	6	-5	-1	-1	-1	1	-41	1	-13	0	-1	-3	385	3	-4	0	0	0	0	0	0	0	0
PF01536	SAM_decarbox	Adenosylmethionine decarboxylase	0	3	28	35	1	1	3	1	22	33	0.473684	0.348297	2.11111	2.87111	0.636475	1.32838	-0.371621	-0.603637	0.232015		0	-1	-1	0	0	0	0	0	0	0	0	-1	0	0	0	0	0	0	0	0	-2	0	3	-1	0	0	-1
PF01541	GIY-YIG	GIY-YIG catalytic domain	5	6	31	55	2	2	4	3	30	55	0.696594	0.408348	2.87111	4.89778	0.287205	1.86687	-0.227666	-0.76489	0.537224		-1	-1	0	3	2	-1	1	0	-1	0	3	0	0	0	-2	0	0	1	-1	0	0	0	0	0	0	-1	1
PF01544	CorA	CorA-like Mg2+ transporter protein	7	3	62	63	4	8	6	8	53	46	0.802855	1.75439	4.98222	4.56	0.210269	2.8011	-0.189394	1.02595	-1.21535		1	2	-2	0	0	0	1	0	0	1	2	0	-2	0	-1	0	1	0	1	6	-1	0	9	-4	0	0	0
PF01545	Cation_efflux	Cation efflux family	7	8	171	31	12	2	15	4	142	32	0.905129	0.657895	13.2578	3.04	0.129484	0.386728	-0.143291	-0.272439	0.129148		-3	-4	-3	7	-1	5	-2	2	-1	1	1	-2	0	4	2	0	0	-1	0	18	10	12	15	2	12	6	5
PF01546	Peptidase_M20	Peptidase family M20/M25/M40	7	5	58	78	5	8	5	6	53	65	1.02087	1.33432	4.89778	5.99556	0.00231334	0.725164	0.016988	0.404002	-0.387014		0	0	-1	2	0	1	0	2	0	1	1	-1	0	1	-1	1	-2	-2	0	0	-3	0	10	-8	0	0	-2
PF01547	SBP_bac_1	Bacterial extracellular solute-binding protein	3	5	24	51	0	6	2	7	24	41	0	1.48026	2.19556	4.05333	2.39806	1.01078	-0.915474	0.502082	-1.41756		0	-1	0	1	2	0	0	0	0	0	-1	0	-1	0	-1	-1	1	0	0	0	0	0	0	0	0	-1	2
PF01549	ShK	ShK domain-like	5	7	166	32	10	4	18	2	135	32	0.773994	1.39319	12.92	2.87111	0.71675	0.480144	-0.400978	0.311263	-0.71224		0	-7	0	43	1	0	-2	3	0	0	-2	0	-10	0	-1	-1	3	8	-4	5	7	28	13	7	1	12	16
PF01551	Peptidase_M23	Peptidase family M23	7	4	42	48	3	5	3	2	40	42	0.826193	1.34569	3.63111	3.71556	0.119092	0.480456	-0.136664	0.311388	-0.448053		-1	0	0	3	0	2	1	0	0	0	-1	0	-1	1	0	2	2	1	-2	-1	0	0	3	0	0	0	1
PF01553	Acyltransferase	Acyltransferase	8	7	176	26	12	2	16	2	148	27	0.866496	0.816697	13.8489	2.44889	0.267916	0.0893403	-0.218436	-0.116329	-0.102108		-4	-3	-3	6	2	6	0	0	-2	2	-3	1	0	5	-1	-1	5	0	1	13	12	18	22	4	16	6	7
PF01554	MatE	MatE	9	9	231	0	16	3	21	0	194	6	0.881273	5.92105	18.1556	0.506667	0.277753	13.0018	-0.22317	3.50697	-3.73014		-4	-5	-3	20	1	3	-1	3	-2	1	-2	0	-6	2	-6	3	9	3	-2	12	6	31	42	1	17	20	21
PF01555	N6_N4_Mtase	DNA methylase	2	5	24	77	2	8	1	5	23	65	0.986842	1.35338	2.02667	5.91111	0.00038054	0.798708	-0.00681238	0.430065	-0.436877		0	0	-1	0	0	1	-1	0	-1	0	-1	-1	1	0	0	0	0	0	0	0	-2	1	0	-1	0	0	-1
PF01556	DnaJ_C	DnaJ C terminal domain	5	4	170	29	10	3	16	2	140	26	0.759109	1.2688	13.1733	2.36444	0.830318	0.184941	-0.441075	0.17577	-0.616845		2	0	-3	0	1	4	0	0	0	0	0	-1	0	-2	0	0	8	-1	1	18	15	20	31	5	14	8	9
PF01557	FAA_hydrolase	Fumarylacetoacetate (FAA) hydrolase family	6	1	51	57	4	3	3	4	48	49	0.928793	0.670308	4.30667	4.47556	0.0236921	0.528736	-0.0566683	-0.330554	0.273886		1	-1	0	1	0	1	1	0	0	0	0	0	1	0	0	0	2	0	0	0	-2	5	5	-3	-2	0	0
PF01558	POR	Pyruvate ferredoxin/flavodoxin oxidoreductase	2	3	18	38	1	5	1	3	18	29	0.623269	1.85033	1.60444	2.70222	0.247574	2.10781	-0.208458	0.834016	-1.04247		0	0	-1	0	0	1	0	0	0	0	-1	0	0	0	0	0	4	-1	0	0	-1	3	5	-2	-1	0	0
PF01562	Pep_M12B_propep	Reprolysin family propeptide	1	4	6	18	0	4	2	1	5	17	0	2.63158	0.591111	1.52	0.645631	4.34663	-0.375018	1.43083	-1.80585		-1	0	0	0	0	0	0	1	0	0	-1	-1	0	0	0	0	-1	0	0	0	0	0	0	0	0	0	0
PF01564	Spermine_synth	Spermine/spermidine synthase domain	5	6	163	18	12	3	15	1	133	19	0.960171	1.77632	12.4978	1.68889	0.021506	1.0985	-0.0538382	0.530774	-0.584612		0	0	0	0	2	-1	-1	0	0	0	-1	1	0	-1	-4	2	2	2	-1	2	1	8	12	0	5	21	21
PF01565	FAD_binding_4	FAD binding domain	5	9	170	32	12	5	16	3	139	31	0.916808	1.74149	13.0889	2.87111	0.0982903	1.70399	-0.122691	0.717225	-0.839916		0	-4	-1	13	11	0	0	1	0	0	-3	-1	-3	-1	-4	-3	3	7	-6	12	9	17	26	3	8	5	5
PF01566	Nramp	Natural resistance-associated macrophage protein	5	4	54	59	1	6	7	3	46	51	0.223436	1.31579	4.47556	4.56	2.9429	0.492139	-1.06421	0.316076	-1.38029		1	0	-1	1	3	2	0	0	0	0	-1	0	-1	0	-1	0	3	0	0	1	0	-1	-1	-3	0	0	0
PF01568	Molydop_binding	Molydopterin dinucleotide binding domain	0	0	2	17	0	4	0	4	2	9	0	3.64372	0.168889	1.09778	0.184466	8.20234	-0.175508	2.37845	-2.55395		0	0	0	0	0	0	0	0	0	0	0	0	0	0	0	0	0	0	0	0	0	0	0	0	0	0	0
PF01569	PAP2	PAP2 superfamily	8	8	164	28	13	3	15	1	136	30	1.01952	1.14601	12.7511	2.61778	0.00526762	0.0604636	0.0258838	0.0937918	-0.067908		-2	-2	-1	2	0	1	0	1	-1	1	-3	-1	0	3	-1	1	9	1	-1	14	10	19	24	3	11	2	5
PF01570	Flavi_propep	Flavivirus polyprotein propeptide	0	0	0	0	0	0	0	0	0	0	0	0	0	0	0	0	FALSE	FALSE	FALSE		0	0	0	0	0	0	0	0	0	0	0	0	0	0	0	0	0	0	0	0	0	0	0	0	0	0	0
PF01571	GCV_T	Aminomethyltransferase folate-binding domain	5	7	62	70	3	9	6	8	53	58	0.602141	1.61483	4.98222	5.57333	0.857557	2.27595	-0.450478	0.881424	-1.3319		2	-1	-2	4	-1	1	0	-1	0	0	-1	0	-1	-1	0	0	1	1	0	1	-1	1	7	-7	1	0	0
PF01575	MaoC_dehydratas	MaoC like domain	3	6	44	61	7	5	4	5	33	56	2.2404	0.970664	3.12444	5.15111	5.17469	0.00480821	1.63982	-0.0246978	1.66452		-1	-2	-1	5	0	0	0	0	0	0	-1	1	0	0	-1	0	0	-1	1	0	-2	3	8	-2	-1	0	0
PF01576	Myosin_tail_1	Myosin tail	0	0	31	60	0	5	0	10	28	40	0	1.18421	2.36444	4.22222	2.58252	0.155188	-0.966378	0.158875	-1.12525		0	0	0	0	0	0	0	0	0	0	0	0	0	0	0	0	0	0	0	0	-3	4	0	-2	3	1	0
PF01578	Cytochrom_C_asm	Cytochrome C assembly protein	1	5	13	17	0	3	2	5	12	13	0	1.97368	1.18222	1.52	1.29126	1.5535	-0.592073	0.672396	-1.26447		0	0	0	0	-1	0	0	0	0	-1	-1	0	0	0	-1	0	0	1	-1	0	0	3	0	0	0	0	0
PF01580	FtsK_SpoIIIE	FtsK/SpoIIIE family	0	0	9	42	0	4	1	9	7	29	0	1.24654	0.675556	3.20889	0.737864	0.211172	-0.40855	0.189868	-0.598419		0	0	0	0	0	0	0	0	0	0	0	0	0	0	0	0	0	0	0	0	0	0	4	0	1	0	0
PF01582	TIR	TIR domain	2	3	22	52	2	5	1	9	19	37	1.18421	1.28719	1.68889	3.88444	0.0620753	0.346784	0.0951518	0.254973	-0.159821		0	0	0	2	0	-1	0	0	0	0	-1	0	-1	0	0	0	3	0	0	0	-1	0	-1	0	0	-1	10
PF01583	APS_kinase	Adenylylsulphate kinase	4	5	38	43	1	4	4	3	36	38	0.296053	1.15533	3.37778	3.46222	1.82411	0.090494	-0.752457	0.117163	-0.869619		1	-1	0	3	1	0	0	1	0	0	-1	0	0	-1	-1	0	-1	0	0	0	1	-1	4	-2	0	0	0
PF01584	CheW	CheW-like domain	0	0	0	0	0	0	0	0	0	0	0	0	0	0	0	0	FALSE	FALSE	FALSE		0	0	0	0	0	0	0	0	0	0	0	0	0	0	0	0	0	0	0	0	0	0	0	0	0	0	0
PF01585	G-patch	G-patch domain	8	6	67	80	9	7	7	7	56	67	1.69173	1.1202	5.32	6.24889	2.74866	0.0978302	1.01173	0.12237	0.889356		-2	-4	-1	2	0	1	1	0	-1	1	-1	-1	1	4	0	0	1	0	1	0	-2	5	1	-2	0	0	0
PF01588	tRNA_bind	Putative tRNA binding domain	5	5	57	65	2	7	8	4	47	56	0.430622	1.38158	4.64444	5.06667	1.63926	0.798071	-0.698043	0.429842	-1.12788		0	0	-1	2	2	1	0	0	0	0	-1	-1	-1	1	-1	0	0	1	0	4	-1	0	5	-3	0	0	0
PF01590	GAF	GAF domain	6	5	69	74	3	7	6	7	63	60	0.514874	1.23723	5.82667	5.65778	1.49203	0.344783	-0.65384	0.254081	-0.907922		0	1	-2	0	-1	7	1	0	0	0	1	-2	-1	0	0	0	2	-2	3	1	-4	0	7	-5	3	0	0
PF01591	6PF2K	6-phosphofructo-2-kinase	5	3	56	59	2	8	6	2	50	50	0.422932	1.82186	4.72889	4.39111	1.71454	3.20022	-0.72034	1.13295	-1.85329		1	-1	0	7	0	1	0	0	-1	1	0	0	-3	0	0	0	3	0	0	2	0	0	1	-3	0	0	2
PF01592	NifU_N	NifU-like N terminal domain	5	1	37	46	6	4	3	0	28	40	2.29202	1.18421	2.61778	3.37778	4.70261	0.124151	1.52119	0.139916	1.38128		0	-1	0	0	1	0	0	1	0	0	1	0	0	1	0	0	1	0	0	0	1	0	4	-1	0	0	0
PF01593	Amino_oxidase	Flavin containing amine oxidoreductase	7	10	235	0	15	4	21	0	196	6	0.818579	7.89474	18.3244	0.506667	0.654848	25.3711	-0.378424	6.32518	-6.7036		1	-5	-3	11	9	4	0	1	0	-1	-2	-1	-5	-1	-4	-4	10	12	-8	13	9	34	39	4	23	22	19
PF01594	AI-2E_transport	AI-2E family transporter	3	4	29	56	3	6	1	8	26	43	1.31579	1.39319	2.28	4.30667	0.24607	0.720216	0.207709	0.402225	-0.194516		0	0	-2	2	0	0	0	0	0	0	-1	-1	-2	1	0	0	4	0	0	6	0	-1	0	-7	0	0	0
PF01595	DUF21	Cyclin M transmembrane N-terminal domain	6	3	62	76	6	7	6	7	52	62	1.22505	1.20137	4.89778	5.82667	0.268606	0.255896	0.21877	0.212572	0.00619756		1	0	-2	3	0	2	0	0	1	0	-1	0	0	-1	1	0	4	0	0	0	-3	2	0	-4	0	0	2
PF01596	Methyltransf_3	O-methyltransferase	6	6	63	76	5	10	7	0	52	68	1.00357	1.74149	4.98222	5.74222	6.87906e-05	3.40797	0.00288353	1.18787	-1.18499		0	-1	-3	1	0	1	0	0	0	-1	-2	0	0	1	-1	1	17	1	-1	0	-11	47	21	-18	1	3	-1
PF01597	GCV_H	Glycine cleavage H-protein	3	2	40	34	2	3	1	1	37	28	0.623269	1.22505	3.20889	2.44889	0.495148	0.134303	-0.317278	0.146295	-0.463572		-1	-1	0	2	0	0	0	0	0	0	0	0	0	2	0	0	2	0	0	0	-2	3	3	-2	-1	0	1
PF01598	0	0	0	0	0	0	0	0	0	0	0	0	0	0	0	0	0	0	FALSE	FALSE	FALSE		0	0	0	0	0	0	0	0	0	0	0	0	0	0	0	0	0	0	0	0	0	0	0	0	0	0	0
PF01599	Ribosomal_S27	Ribosomal protein S27a	2	2	34	58	2	5	3	3	28	48	0.764007	1.16099	2.61778	4.30667	0.158353	0.12092	-0.160725	0.137845	-0.29857		0	-1	1	0	0	0	0	0	0	0	0	0	0	0	0	1	0	-1	0	5	-2	0	10	-2	-1	0	1
PF01602	Adaptin_N	Adaptin N terminal region	7	5	88	104	3	13	11	7	76	85	0.408348	1.67334	7.34667	7.76889	2.8003	3.80376	-1.02573	1.29126	-2.31699		1	-1	-2	1	0	1	0	0	0	0	2	2	0	-1	-1	0	1	-1	1	6	-19	10	44	-15	-1	3	0
PF01603	B56	Protein phosphatase 2A regulatory B subunit (B56 family)	4	1	53	40	4	2	5	1	46	33	0.928793	0.696594	4.30667	2.87111	0.0236921	0.287205	-0.0566683	-0.227666	0.170998		0	-1	0	1	0	0	0	0	0	1	2	0	0	0	0	0	4	0	0	12	-2	1	1	-3	-1	0	0
PF01607	CBM_14	Chitin binding Peritrophin-A domain	0	0	24	36	2	3	2	3	20	30	1.07656	1.07656	1.85778	2.78667	0.0118013	0.017702	0.0392949	0.0485873	-0.00929247		0	0	0	0	0	0	0	0	0	0	0	0	0	0	0	0	0	0	0	1	-1	-1	0	-1	0	0	0
PF01608	I_LWEQ	I/LWEQ domain	0	0	1	4	0	0	0	0	1	4	0	0	0.0844444	0.337778	0.092233	0.368932	-0.118411	-0.264731	0.146319		0	0	0	0	0	0	0	0	0	0	0	0	0	0	0	0	0	0	0	0	0	0	0	0	0	0	0
PF01609	DDE_Tnp_1	Transposase DDE domain	0	0	3	25	1	0	0	2	2	20	5.92105	0	0.168889	1.85778	4.33393	2.02913	1.42759	-0.811608	2.2392		0	0	0	0	0	0	0	0	0	0	0	0	0	0	0	0	0	0	0	0	0	0	0	0	0	0	0
PF01612	DNA_pol_A_exo1	3'-5' exonuclease	8	9	170	33	12	3	17	4	141	33	0.8994	0.960171	13.3422	3.12444	0.146527	0.0053765	-0.153739	-0.0261576	-0.127582		-4	-6	-1	7	4	1	1	0	-2	2	-4	-2	0	4	-3	-1	20	3	-2	14	7	27	36	4	19	10	8
PF01613	Flavin_Reduct	Flavin reductase like domain	6	5	52	58	4	3	8	2	45	53	0.893744	0.645933	4.47556	4.64444	0.0548364	0.632926	-0.0889214	-0.370301	0.281379		-1	-3	0	0	2	0	1	0	0	0	-1	0	1	1	1	-1	0	-1	1	0	-1	8	0	-3	0	0	1
PF01619	Pro_dh	Proline dehydrogenase	3	1	37	50	1	1	4	2	30	45	0.348297	0.25196	2.87111	3.96889	1.32838	2.42103	-0.603637	-0.921848	0.318211		0	0	0	2	0	0	-1	0	0	0	0	0	0	0	1	0	2	0	0	0	-2	0	2	0	0	0	0
PF01624	MutS_I	MutS domain I	4	6	52	68	7	6	8	7	41	58	1.69173	1.09312	4.13778	5.48889	2.13785	0.051581	0.842533	0.0860089	0.756524		-1	0	-1	0	0	1	0	0	0	1	-1	0	-1	1	0	0	-1	3	-1	0	-1	1	1	-1	0	0	1
PF01625	PMSR	Peptide methionine sulfoxide reductase	5	6	170	22	12	2	16	2	139	23	0.916808	0.947368	13.0889	2.11111	0.0982903	0.00634398	-0.122691	-0.0284847	-0.0942068		0	-4	0	3	3	0	0	-1	0	-1	-2	0	1	0	0	-1	3	1	-1	10	7	14	26	3	8	7	7
PF01627	Hpt	Hpt domain	4	6	34	45	4	3	4	2	28	45	1.48026	0.755879	2.70222	3.96889	0.673856	0.25692	0.385408	-0.213075	0.598483		-1	2	-1	-1	1	0	0	1	-1	0	-1	0	0	1	-1	0	0	0	0	0	0	0	1	0	0	0	0
PF01630	Glyco_hydro_56	Hyaluronidase	0	0	3	7	0	0	0	0	3	6	0	0	0.253333	0.506667	0.276699	0.553398	-0.222665	-0.340148	0.117483		0	0	0	0	0	0	0	0	0	0	0	0	0	0	0	0	0	0	0	0	0	0	0	0	0	0	0
PF01632	Ribosomal_L35p	Ribosomal protein L35	2	5	18	51	1	1	2	7	17	47	0.623269	0.219298	1.60444	4.56	0.247574	3.03056	-0.208458	-1.08773	0.879268		0	-1	0	0	-1	0	0	0	1	0	0	0	0	0	-1	0	-1	1	-1	0	-1	0	3	0	0	0	0
PF01633	Choline_kinase	Choline/ethanolamine kinase	5	6	55	77	2	8	7	6	48	65	0.430622	1.33432	4.64444	5.99556	1.63926	0.725164	-0.698043	0.404002	-1.10205		0	1	-1	0	0	1	-1	1	0	0	-1	0	-2	0	-2	0	4	-1	1	0	-2	1	1	-4	1	0	-1
PF01634	HisG	ATP phosphoribosyltransferase	1	1	23	31	2	2	2	1	20	25	1.07656	0.910931	1.85778	2.19556	0.0118013	0.0188999	0.0392949	-0.050291	0.0895859		0	0	1	-1	0	0	0	0	0	0	0	0	0	0	0	0	0	0	0	0	-1	0	1	0	0	0	-1
PF01636	APH	Phosphotransferase enzyme family	9	9	225	9	13	5	21	0	189	13	0.733083	4.55466	17.7333	1.09778	1.37256	14.772	-0.617311	3.91605	-4.53336		6	-2	-4	12	3	3	-3	3	-2	1	-2	2	-10	-5	-4	0	11	1	-1	76	29	88	132	4	72	20	25
PF01637	ATPase_2	ATPase domain predominantly from Archaea	0	0	23	58	1	3	2	5	18	47	0.592105	0.683198	1.68889	4.39111	0.305569	0.478944	-0.236264	-0.310779	0.0745156		0	0	0	0	0	0	0	0	0	0	0	0	0	0	0	0	0	0	0	-1	-1	0	0	0	0	-2	3
PF01641	SelR	SelR domain	4	4	62	73	5	6	10	3	47	64	1.03878	1.06049	4.81333	5.65778	0.00784846	0.0224391	0.0317943	0.0550612	-0.0232669		3	0	0	3	0	1	0	0	0	0	-2	0	-3	-1	-2	0	3	0	0	0	0	0	6	-3	-2	-2	2
PF01642	MM_CoA_mutase	Methylmalonyl-CoA mutase	2	1	26	34	3	2	2	3	21	29	1.54462	0.740132	1.94222	2.70222	0.622598	0.198241	0.366447	-0.183001	0.549448		0	0	0	1	0	0	0	0	0	0	1	0	0	0	0	0	-1	0	0	0	0	0	2	0	0	-1	0
PF01643	Acyl-ACP_TE	Acyl-ACP thioesterase	4	5	8	36	1	3	2	5	8	31	1.18421	0.986842	0.844444	3.04	0.0310377	0.00057081	0.0654226	-0.00835797	0.0737806		0	-1	0	0	1	0	0	1	0	0	1	0	-1	-1	-1	-1	1	0	0	0	-1	0	0	0	0	0	0
PF01644	Chitin_synth_1	Chitin synthase	0	0	6	26	0	2	0	2	4	19	0	1.12782	0.337778	1.77333	0.368932	0.0313929	-0.264731	0.0658215	-0.330552		0	0	0	0	0	0	0	0	0	0	0	0	0	0	0	0	0	0	0	0	0	0	0	0	0	0	0
PF01645	Glu_synthase	Conserved region in glutamate synthase	3	3	62	61	3	5	5	6	57	51	0.573005	1.03878	5.23556	4.81333	1.03819	0.00784846	-0.511108	0.0317943	-0.542903		1	0	0	0	0	0	0	0	-1	0	0	0	0	0	-1	0	2	2	-1	0	-3	1	3	-1	0	0	0
PF01648	ACPS	4'-phosphopantetheinyl transferase superfamily	2	6	44	60	2	7	3	7	39	47	0.56391	1.53509	3.54667	4.56	0.73362	1.4111	-0.407033	0.629165	-1.0362		0	-2	-1	1	1	0	0	0	0	0	-1	0	0	0	-1	0	-1	0	-1	1	0	2	3	-4	0	-1	0
PF01649	Ribosomal_S20p	Ribosomal protein S20	0	3	13	25	1	4	0	4	12	19	0.986842	2.0595	1.01333	1.94222	0.00019027	2.3492	-0.00480614	0.901884	-0.90669		0	0	0	0	0	0	0	0	0	-1	-1	0	0	0	0	0	0	0	-1	0	0	0	1	-1	0	0	0
PF01650	Peptidase_C13	Peptidase C13 family	4	3	27	60	1	6	2	6	28	49	0.394737	1.29187	2.53333	4.64444	1.01066	0.428247	-0.502042	0.290009	-0.792051		1	-1	1	0	0	0	0	0	1	0	-1	0	-1	0	0	0	3	0	0	0	0	1	2	-2	4	0	0
PF01652	IF4E	Eukaryotic initiation factor 4E	5	4	44	48	3	8	4	3	40	38	0.807416	2.31065	3.71556	3.46222	0.149634	6.39964	-0.155594	1.94255	-2.09814		0	-3	-1	0	0	2	0	0	1	-1	0	0	2	-1	0	0	6	0	1	0	0	0	4	-4	-2	0	1
PF01653	DNA_ligase_aden	NAD-dependent DNA ligase adenylation domain	2	3	20	36	3	2	2	4	16	31	1.97368	0.676692	1.52	2.95556	1.5535	0.335759	0.672396	-0.250042	0.922438		-1	0	0	0	1	0	0	0	0	0	0	0	0	1	0	0	-1	-1	0	0	0	0	0	0	0	0	0
PF01655	Ribosomal_L32e	Ribosomal protein L32	1	0	37	36	6	1	2	2	28	28	2.36842	0.394737	2.53333	2.53333	5.10296	1.01066	1.62187	-0.502042	2.12392		0	0	0	1	0	0	0	0	0	0	0	0	0	0	0	0	0	0	0	4	-1	-1	5	0	0	0	1
PF01656	CbiA	CobQ/CobB/MinD/ParA nucleotide binding domain	7	7	172	20	12	2	16	1	143	23	0.893744	0.986842	13.4267	2.02667	0.164509	0.00038054	-0.164285	-0.00681238	-0.157473		0	-9	-4	7	3	4	0	0	1	0	0	1	2	-1	-2	-1	-2	-2	2	6	4	10	11	0	13	6	8
PF01658	Inos-1-P_synth	Myo-inositol-1-phosphate synthase	1	4	27	40	0	5	3	1	25	37	0	1.55817	2.36444	3.20889	2.58252	1.08037	-0.966378	0.524889	-1.49127		0	1	0	-1	0	0	0	0	0	0	0	0	-1	-1	0	0	-2	0	0	0	0	0	6	0	-1	1	0
PF01660	Vmethyltransf	Viral methyltransferase	0	0	0	0	0	0	0	0	0	0	0	0	0	0	0	0	FALSE	FALSE	FALSE		0	0	0	0	0	0	0	0	0	0	0	0	0	0	0	0	0	0	0	0	0	0	0	0	0	0	0
PF01661	Macro	Macro domain	4	2	47	61	6	4	6	5	36	51	1.69173	0.845865	3.54667	4.72889	1.83244	0.12196	0.754883	-0.138514	0.893397		-1	2	0	0	0	0	0	0	0	0	1	0	0	2	0	0	5	0	-1	0	-4	5	7	-3	-1	0	0
PF01663	Phosphodiest	Type I phosphodiesterase / nucleotide pyrophosphatase	3	5	65	81	4	6	9	7	51	69	0.789474	0.934903	5.06667	6.41778	0.243868	0.0295053	-0.20661	-0.0636786	-0.142932		0	-2	-1	10	0	0	0	0	0	0	0	-1	-3	0	-1	0	2	0	1	0	-3	2	6	-4	2	0	2
PF01667	Ribosomal_S27e	Ribosomal protein S27	2	4	28	57	8	5	0	3	21	49	4.51128	1.13866	1.77333	4.39111	23.2876	0.0914782	5.85543	0.11787	5.73756		-1	0	0	0	0	0	0	0	-1	0	0	0	1	1	-1	0	-1	0	0	0	2	-2	8	-1	-2	0	-1
PF01668	SmpB	SmpB protein	1	3	11	46	0	2	0	4	12	42	0	0.514874	1.01333	3.88444	1.1068	0.994689	-0.533459	-0.496755	-0.0367039		0	-1	-1	0	0	0	0	0	0	0	0	0	0	0	1	0	-1	0	0	0	0	0	0	0	0	0	0
PF01674	Lipase_2	Lipase (class 2)	0	0	0	4	0	0	0	1	0	3	0	0	0	0.337778	0	0.368932	FALSE	-0.264731	FALSE		0	0	0	0	0	0	0	0	0	0	0	0	0	0	0	0	0	0	0	0	0	0	0	0	0	0	0
PF01676	Metalloenzyme	Metalloenzyme superfamily	0	0	19	43	1	3	2	5	14	34	0.740132	0.910931	1.35111	3.29333	0.0991205	0.0283498	-0.12327	-0.0623372	-0.0609326		0	0	0	0	0	0	0	0	0	0	0	0	0	0	0	0	0	0	0	0	0	0	0	0	0	0	0
PF01678	DAP_epimerase	Diaminopimelate epimerase	1	2	19	23	1	1	3	0	15	20	0.657895	0.592105	1.52	1.68889	0.193364	0.305569	-0.18037	-0.236264	0.0558941		0	0	0	0	0	0	0	0	-1	0	0	0	0	0	0	0	-1	1	0	0	-1	0	-1	0	0	0	-1
PF01679	Pmp3	Proteolipid membrane potential modulator	0	0	9	21	0	2	0	1	7	18	0	1.24654	0.591111	1.60444	0.645631	0.105586	-0.375018	0.127712	-0.50273		0	0	0	0	0	0	0	0	0	0	0	0	0	0	0	0	0	0	0	1	-1	0	-1	0	0	0	0
PF01680	SOR_SNZ	SOR/SNZ family	4	1	41	25	4	0	3	2	35	22	1.24654	0	3.20889	2.02667	0.211172	2.21359	0.189868	-0.863915	1.05378		-1	0	0	2	0	0	0	0	1	0	0	0	0	1	0	0	1	0	0	1	-2	0	1	-2	0	0	3
PF01683	EB	EB module	0	0	1	15	0	1	1	2	0	12	0	0.845865	0.0844444	1.18222	0.092233	0.0304899	-0.118411	-0.0648036	-0.0536079		0	0	0	0	0	0	0	0	0	0	0	0	0	0	0	0	0	0	0	0	0	0	0	0	0	0	0
PF01687	Flavokinase	Riboflavin kinase	2	2	39	54	2	4	6	2	30	48	0.657895	0.947368	3.04	4.22222	0.386728	0.012688	-0.272439	-0.0408082	-0.231631		0	-1	-1	2	0	0	0	0	1	0	0	0	0	0	0	0	0	0	0	0	0	1	1	-1	0	-1	0
PF01693	Cauli_VI	Caulimovirus viroplasmin	2	6	23	74	3	7	2	6	19	64	1.69173	1.18421	1.77333	5.91111	0.91622	0.217264	0.47048	0.193052	0.277428		0	0	0	-1	0	0	0	1	0	-1	-1	-1	0	-1	0	0	2	0	-1	0	-1	2	0	0	0	0	0
PF01694	Rhomboid	Rhomboid family	7	7	171	27	11	3	15	3	143	26	0.82445	1.22505	13.3422	2.44889	0.44642	0.134303	-0.297535	0.146295	-0.44383		0	-4	-1	5	1	3	0	2	-1	1	0	-2	-1	0	-1	0	4	1	-1	19	10	22	22	5	15	7	10
PF01695	IstB_IS21	IstB-like ATP binding protein	0	4	20	63	2	4	2	7	16	54	1.31579	0.776531	1.52	5.15111	0.164046	0.279377	0.164019	-0.223946	0.387965		-1	0	0	0	0	-1	0	0	-1	0	0	0	0	0	0	0	-1	0	0	0	-1	0	0	0	0	-1	1
PF01696	Adeno_E1B_55K	Adenovirus EB1 55K protein / large t-antigen	0	0	1	7	0	0	1	2	0	5	0	0	0.0844444	0.591111	0.092233	0.645631	-0.118411	-0.375018	0.256607		0	0	0	0	0	0	0	0	0	0	0	0	0	0	0	0	0	0	0	0	0	0	0	0	0	0	0
PF01697	Glyco_transf_92	Glycosyltransferase family 92	6	7	59	62	5	5	6	3	51	56	1.03878	1.00357	4.81333	4.98222	0.00784846	6.87906e-05	0.0317943	0.00288353	0.0289107		-2	-1	-1	0	3	3	0	0	3	-1	-1	0	1	1	0	-2	-1	1	0	0	0	0	1	-2	0	0	11
PF01698	SAM_LFY	Floricaula / Leafy protein SAM domain	0	0	0	0	0	0	0	0	0	0	0	0	0	0	0	0	FALSE	FALSE	FALSE		0	0	0	0	0	0	0	0	0	0	0	0	0	0	0	0	0	0	0	0	0	0	0	0	0	0	0
PF01699	Na_Ca_ex	Sodium/calcium exchanger protein	7	7	162	43	7	7	17	3	139	36	0.531377	2.12551	13.1733	3.29333	3.14733	4.49359	-1.11889	1.46824	-2.58713		3	0	-5	0	1	3	-1	1	0	0	0	-3	3	-1	-1	-1	19	1	-1	29	2	25	50	-8	13	6	6
PF01701	PSI_PsaJ	Photosystem I reaction centre subunit IX / PsaJ	0	0	9	17	0	2	0	3	8	11	0	1.69173	0.675556	1.18222	0.737864	0.610813	-0.40855	0.362028	-0.770579		0	0	0	0	0	0	0	0	0	0	0	0	0	0	0	0	0	0	0	0	2	1	-1	-1	1	0	0
PF01702	TGT	Queuine tRNA-ribosyltransferase	3	4	52	46	5	3	3	3	45	39	1.23355	0.845865	4.05333	3.54667	0.239406	0.0914698	0.204373	-0.117864	0.322238		0	-1	0	1	0	-1	0	0	-1	1	0	0	0	0	0	0	0	-1	1	1	0	0	1	0	0	1	-1
PF01704	UDPGP	UTP--glucose-1-phosphate uridylyltransferase	5	7	61	68	1	9	5	1	58	60	0.18797	1.7472	5.32	5.15111	3.82601	3.10431	-1.29703	1.10743	-2.40446		2	-1	-1	9	0	2	-1	0	0	0	-1	0	-2	-1	-1	0	2	1	0	0	-9	5	4	-7	0	0	0
PF01709	Transcrip_reg	Transcriptional regulator	3	3	40	27	1	2	4	2	36	23	0.296053	0.947368	3.37778	2.11111	1.82411	0.00634398	-0.752457	-0.0284847	-0.723972		0	0	-1	1	-1	1	0	0	0	0	-1	0	0	0	0	1	0	0	0	0	-1	0	1	0	0	-1	0
PF01712	dNK	Deoxynucleoside kinase	4	3	15	35	3	4	2	3	13	28	2.36842	1.52801	1.26667	2.61778	2.55148	0.788832	0.957853	0.426602	0.531251		0	0	0	-1	0	1	0	0	0	0	2	1	-1	-1	0	0	1	0	0	0	0	0	5	0	0	0	0
PF01713	Smr	Smr domain	7	6	57	74	4	7	5	5	51	64	0.845865	1.20137	4.72889	5.82667	0.12196	0.255896	-0.138514	0.212572	-0.351087		1	0	-1	2	-2	1	1	0	0	-1	1	-1	-1	-1	0	1	1	0	0	0	-3	9	2	-3	0	2	0
PF01715	IPPT	IPP transferase	1	2	19	65	0	6	2	3	16	54	0	1.24654	1.52	4.81333	1.66019	0.316759	-0.704263	0.24142	-0.945683		0	0	0	0	1	0	0	0	0	0	0	0	0	0	0	0	-1	-1	0	0	-1	0	-1	0	0	0	0
PF01716	MSP	Manganese-stabilising protein / photosystem II polypeptide	2	1	29	33	3	3	2	1	25	26	1.31579	1.31579	2.28	2.28	0.24607	0.24607	0.207709	0.207709	0		0	0	0	0	0	0	0	0	0	-1	0	0	1	0	0	0	6	0	0	0	0	11	-4	-9	0	0	0
PF01717	Meth_synt_2	Cobalamin-independent synthase, Catalytic domain	0	0	22	61	0	5	4	6	16	48	0	1.09649	1.68889	4.56	1.84466	0.0460123	-0.758439	0.0808417	-0.839281		0	0	0	0	0	0	0	0	0	0	0	0	0	0	0	0	0	0	0	-1	0	1	0	1	0	-1	3
PF01722	BolA	BolA-like protein	4	6	55	53	7	5	3	3	48	47	1.62539	1.18421	4.30667	4.22222	1.81948	0.155188	0.751106	0.158875	0.592231		-2	-2	-2	1	0	1	0	0	0	1	-1	-1	0	2	0	0	0	-1	0	0	0	1	7	-1	0	0	-1
PF01725	Ham1p_like	Ham1 family	5	2	34	52	2	3	4	5	32	43	0.657895	0.740132	3.04	4.05333	0.386728	0.297362	-0.272439	-0.232442	-0.0399963		0	0	0	0	0	0	0	0	0	0	1	1	-1	1	0	0	1	-1	1	-1	0	0	3	0	-1	0	0
PF01726	LexA_DNA_bind	LexA DNA binding domain	0	0	1	18	0	1	0	5	1	11	0	0.740132	0.0844444	1.35111	0.092233	0.0991205	-0.118411	-0.12327	0.00485836		0	0	0	0	0	0	0	0	0	0	0	0	0	0	0	0	0	0	0	0	0	0	0	0	0	0	0
PF01728	FtsJ	FtsJ-like methyltransferase	4	7	74	71	5	5	10	4	58	64	0.870743	0.870743	5.74222	5.74222	0.104128	0.104128	-0.12672	-0.12672	0		0	1	0	-1	3	1	-1	0	1	-1	-3	0	0	-1	-1	-1	0	0	0	0	-4	4	6	-3	1	1	0
PF01729	QRPTase_C	Quinolinate phosphoribosyl transferase, C-terminal domain	2	0	30	42	2	3	1	2	27	33	0.845865	1.01504	2.36444	2.95556	0.0609799	0.000724703	-0.094229	0.00942883	-0.103658		0	0	2	0	0	0	0	0	0	0	1	0	0	0	0	0	0	0	0	0	0	0	2	0	0	-1	0
PF01730	UreF	UreF	1	1	9	50	1	4	1	4	7	42	1.48026	1.02975	0.675556	3.88444	0.168464	0.00372714	0.166546	0.0216738	0.144873		0	0	0	0	0	0	-1	0	0	0	0	1	0	0	0	0	0	0	0	0	0	0	0	0	-1	0	0
PF01731	Arylesterase	Arylesterase	0	0	20	43	1	3	1	4	15	33	0.740132	0.960171	1.35111	3.12444	0.0991205	0.0053765	-0.12327	-0.0261576	-0.0971122		0	0	0	0	0	0	0	0	0	0	0	0	0	0	0	0	0	0	0	0	0	0	0	-1	0	0	0
PF01733	Nucleoside_tran	Nucleoside transporter	4	2	46	75	5	6	7	6	36	62	1.37699	1.04489	3.63111	5.74222	0.55829	0.0125456	0.342036	0.0405685	0.301468		0	-1	-2	5	0	0	0	0	1	0	1	0	0	0	0	0	2	0	0	0	-1	1	1	-1	-1	-1	1
PF01734	Patatin	Patatin-like phospholipase	8	7	177	33	13	3	17	3	146	32	0.944462	1.01504	13.7644	2.95556	0.0460574	0.000724703	-0.0808845	0.00942883	-0.0903134		-3	-5	-1	10	2	3	0	1	1	0	4	0	-2	3	-1	-1	-2	0	1	18	4	19	26	1	12	7	10
PF01735	PLA2_B	Lysophospholipase catalytic domain	3	4	5	34	0	5	0	2	7	27	0	2.04174	0.591111	2.44889	0.645631	2.86387	-0.375018	1.04292	-1.41794		1	-1	-1	4	0	0	0	0	1	0	0	0	0	-1	0	0	-1	0	0	0	1	0	-1	0	0	0	0
PF01737	Ycf9	YCF9	0	0	1	3	0	1	0	0	1	1	0	11.8421	0.0844444	0.0844444	0.092233	10.3641	-0.118411	2.89114	-3.00955		0	0	0	0	0	0	0	0	0	0	0	0	0	0	0	0	0	0	0	0	0	0	0	0	0	0	0
PF01738	DLH	Dienelactone hydrolase family	7	8	168	28	11	2	15	2	141	30	0.83502	0.740132	13.1733	2.70222	0.389262	0.198241	-0.273527	-0.183001	-0.0905268		1	-3	-3	6	1	6	0	-1	-1	1	-5	-1	0	0	-3	0	15	3	-2	30	17	24	31	5	10	6	9
PF01739	CheR	CheR methyltransferase, SAM binding domain	4	5	11	41	2	3	0	6	12	35	1.97368	0.866496	1.01333	3.46222	1.03566	0.0669791	0.510278	-0.0992031	0.609481		0	0	1	-1	0	-1	0	0	0	0	-1	0	-1	1	1	0	0	-1	1	0	-1	0	-1	0	0	0	0
PF01740	STAS	STAS domain	6	8	160	23	10	4	16	2	133	23	0.794772	1.89474	12.5822	2.11111	0.575484	1.82275	-0.348637	0.75206	-1.1007		-1	0	-1	1	1	0	0	1	1	-1	-2	-1	-1	0	-2	0	15	1	-1	19	14	22	43	6	17	6	7
PF01741	MscL	Large-conductance mechanosensitive channel, MscL	0	0	6	23	0	1	0	5	5	16	0	0.56391	0.422222	1.77333	0.461165	0.36681	-0.303574	-0.263804	-0.0397695		0	0	0	0	0	0	0	0	0	0	0	0	0	0	0	0	0	0	0	0	0	0	0	0	0	0	0
PF01743	PolyA_pol	Poly A polymerase head domain	1	3	46	58	2	5	5	5	37	48	0.56391	1.11718	3.54667	4.47556	0.73362	0.0665929	-0.407033	0.0988885	-0.505921		-1	0	0	-1	1	0	0	0	0	0	0	0	0	0	0	0	0	-1	0	0	-2	1	2	-1	0	-1	0
PF01744	GLTT	GLTT repeat (6 copies)	0	0	1	13	0	1	1	1	0	11	0	0.986842	0.0844444	1.01333	0.092233	0.00019027	-0.118411	-0.00480614	-0.113605		0	0	0	0	0	0	0	0	0	0	0	0	0	0	0	0	0	0	0	0	0	0	0	0	0	0	0
PF01745	IPT	Isopentenyl transferase	1	3	0	54	0	7	1	4	0	45	0	1.69173	0.0844444	4.13778	0.092233	2.13785	-0.118411	0.842533	-0.960944		0	0	0	0	1	0	-1	0	0	0	0	0	0	-1	0	0	-1	0	0	0	-1	0	-1	0	0	0	0
PF01746	tRNA_m1G_MT	tRNA (Guanine-1)-methyltransferase	4	6	40	52	2	6	4	3	37	46	0.577664	1.45005	3.46222	4.13778	0.671627	0.906282	-0.384592	0.467115	-0.851706		-1	0	-1	1	-1	0	1	0	-1	2	-1	0	0	0	0	0	1	0	-1	0	-2	0	0	-1	0	0	0
PF01747	ATP-sulfurylase	ATP-sulfurylase	7	2	44	38	4	3	4	2	42	32	1.02975	1.04489	3.88444	2.87111	0.00372714	0.00627279	0.0216738	0.0283194	-0.00664561		1	0	0	2	1	1	0	0	0	0	1	0	0	-1	0	0	3	2	-1	1	0	-1	7	-6	0	0	0
PF01749	IBB	Importin beta binding domain	2	5	40	53	3	5	5	1	32	48	0.960171	1.20838	3.12444	4.13778	0.0053765	0.194578	-0.0261576	0.181027	-0.207184		0	-1	0	3	2	0	0	0	0	0	-1	0	0	-1	0	0	-1	-1	0	1	0	0	2	-2	2	0	0
PF01751	Toprim	Toprim domain	5	8	71	80	4	8	8	7	61	66	0.686499	1.29776	5.82667	6.16444	0.622335	0.591586	-0.366349	0.354768	-0.721117		0	2	-3	-1	-1	3	0	0	-1	0	-1	0	-1	-1	0	2	5	-1	1	0	-9	5	2	-2	2	0	2
PF01753	zf-MYND	MYND finger	10	7	216	11	19	0	19	1	178	16	1.14213	0	16.6356	1.43556	0.364105	1.56796	0.26262	-0.676741	0.939361		0	-25	55	10	94	-25	13	-3	-2	2	33	-15	23	10	-6	-11	12	426	0	10	5	16	21	1	8	12	19
PF01754	zf-A20	A20-like zinc finger	4	5	26	37	0	3	4	4	26	33	0	0.960171	2.53333	3.12444	2.76699	0.0053765	-1.0167	-0.0261576	-0.990546		0	0	0	0	1	1	0	-1	1	0	-1	-1	0	0	-1	0	0	-1	1	1	0	0	1	0	0	0	0
PF01755	Glyco_transf_25	Glycosyltransferase family 25 (LPS biosynthesis protein)	6	8	138	24	10	4	13	3	114	24	0.932449	1.75439	10.7244	2.28	0.0530929	1.40055	-0.0873709	0.625928	-0.713299		0	-1	-2	4	0	3	1	0	-2	1	-2	-2	-1	2	-2	0	21	0	-1	52	35	49	60	9	15	3	1
PF01756	ACOX	Acyl-CoA oxidase	1	2	36	32	0	4	4	2	31	27	0	1.63339	2.95556	2.44889	3.22816	1.06122	-1.14037	0.518646	-1.65901		0	0	0	0	0	-1	0	0	0	1	-1	0	0	0	0	0	0	0	0	1	-2	5	1	-3	-1	0	0
PF01757	Acyl_transf_3	Acyltransferase family	5	9	131	28	9	5	14	3	109	28	0.866496	1.91002	10.3867	2.61778	0.200937	2.33786	-0.184445	0.898725	-1.08317		6	-1	-1	6	8	0	0	0	2	-1	-3	-1	-2	-2	-1	-1	6	0	0	13	16	15	39	3	6	1	3
PF01758	SBF	Sodium Bile acid symporter family	7	7	162	22	13	1	16	1	133	26	1.0332	0.438596	12.5822	2.28	0.0150399	0.782298	0.0446037	-0.424305	0.468909		1	-5	0	3	4	0	-1	2	0	-1	1	-1	2	0	0	-1	-2	-2	1	4	2	8	11	3	6	6	4
PF01761	DHQ_synthase	3-dehydroquinate synthase	1	1	51	54	2	3	4	1	44	48	0.493421	0.725027	4.05333	4.13778	1.13194	0.339906	-0.54157	-0.251902	-0.289668		0	-1	0	0	0	0	0	0	0	0	0	0	0	0	0	0	4	0	0	0	-2	4	0	-7	0	1	0
PF01762	Galactosyl_T	Galactosyltransferase	5	7	61	76	5	6	6	4	51	69	1.03878	0.973324	4.81333	6.16444	0.00784846	0.00475804	0.0317943	-0.0245651	0.0563594		-2	0	0	9	3	0	0	0	-1	0	0	-1	-6	3	-2	-1	6	1	-1	54	-1	-1	19	-5	1	6	-1
PF01764	Lipase_3	Lipase (class 3)	9	10	171	52	9	9	17	4	146	48	0.653859	2.0496	13.7644	4.39111	1.79263	5.21271	-0.743267	1.64932	-2.39258		-5	-4	-6	17	2	8	-1	3	1	-1	-7	-3	-7	2	-6	2	22	4	-3	21	-1	32	42	-6	10	8	16
PF01765	RRF	Ribosome recycling factor	1	5	35	32	3	5	3	2	30	27	1.07656	2.04174	2.78667	2.44889	0.017702	2.86387	0.0485873	1.04292	-0.994337		-1	-1	-1	0	0	0	0	0	0	0	-1	0	0	0	2	0	-1	0	0	1	0	0	2	0	0	0	0
PF01768	Birna_VP4	Birnavirus VP4 protein	0	0	0	0	0	0	0	0	0	0	0	0	0	0	0	0	FALSE	FALSE	FALSE		0	0	0	0	0	0	0	0	0	0	0	0	0	0	0	0	0	0	0	0	0	0	0	0	0	0	0
PF01769	MgtE	Divalent cation transporter	3	6	52	62	4	8	5	5	43	50	0.986842	1.72249	4.05333	4.64444	0.00076108	2.6173	-0.00966513	0.975908	-0.985573		-2	0	-1	3	0	0	0	0	0	0	-2	-1	-1	1	0	0	2	-1	0	0	0	1	3	-3	0	1	0
PF01770	Folate_carrier	Reduced folate carrier	2	6	22	39	0	4	5	6	18	34	0	1.18421	1.94222	3.37778	2.12136	0.124151	-0.837861	0.139916	-0.977777		0	-1	0	3	0	0	0	1	0	0	0	-1	-1	-1	-1	-1	0	0	0	0	0	0	4	0	-1	0	0
PF01773	Nucleos_tra2_N	Na+ dependent nucleoside transporter N-terminus	1	5	11	27	0	4	0	1	10	26	0	1.75439	0.844444	2.28	0.92233	1.40055	-0.472546	0.625928	-1.09847		0	-1	0	1	0	0	0	0	0	0	-1	0	-1	0	0	0	-1	0	-1	0	0	0	-1	-1	0	-1	0
PF01774	UreD	UreD urease accessory protein	0	4	11	54	1	4	1	7	8	44	1.31579	0.928793	0.76	4.30667	0.0820232	0.0236921	0.110937	-0.0566683	0.167605		0	0	-1	0	-1	0	-1	0	-1	0	0	0	0	0	0	0	0	0	0	0	0	0	0	0	0	-1	0
PF01775	Ribosomal_L18A	Ribosomal proteins 50S-L18Ae/60S-L20/60S-L18A	3	1	35	50	5	2	1	4	28	41	2.04174	0.526316	2.44889	3.8	2.86387	0.927632	1.04292	-0.474335	1.51726		0	0	2	1	0	0	0	0	0	0	0	0	0	0	0	0	1	-1	0	4	0	-2	9	-2	0	0	0
PF01776	Ribosomal_L22e	Ribosomal L22e protein family	2	0	45	45	6	2	2	4	35	36	1.92034	0.592105	3.12444	3.37778	2.85386	0.611138	1.04022	-0.362151	1.40237		0	0	0	1	0	0	0	0	0	0	0	0	0	0	0	0	1	0	0	7	-1	-2	7	0	-1	0	4
PF01777	Ribosomal_L27e	Ribosomal L27e protein family	1	0	31	42	3	1	1	1	27	37	1.2688	0.311634	2.36444	3.20889	0.184941	1.65685	0.17577	-0.70327	0.87904		0	0	0	0	0	0	0	0	0	0	0	0	0	0	0	0	1	0	0	5	0	-3	9	-2	-1	-1	0
PF01778	Ribosomal_L28e	Ribosomal L28e protein family	3	2	41	57	5	5	4	3	30	47	1.74149	1.18421	2.87111	4.22222	1.70399	0.155188	0.717225	0.158875	0.55835		0	-1	0	0	0	0	0	0	0	0	0	1	1	0	0	0	-1	1	0	2	-1	-1	7	0	0	0	-1
PF01779	Ribosomal_L29e	Ribosomal L29e protein family	1	1	28	62	3	1	0	5	23	52	1.54462	0.207756	1.94222	4.81333	0.622598	3.29449	0.366447	-1.15794	1.52438		1	-1	0	0	0	0	0	0	0	0	0	0	0	0	0	0	0	0	0	1	0	0	5	-2	0	0	0
PF01780	Ribosomal_L37ae	Ribosomal L37ae protein family	2	1	28	66	3	3	0	7	25	53	1.42105	0.592105	2.11111	5.06667	0.404789	0.916707	0.28015	-0.470645	0.750795		0	-1	0	1	0	0	0	0	0	0	0	0	0	0	0	0	1	0	0	6	-2	-2	11	0	-2	-1	0
PF01781	Ribosomal_L38e	Ribosomal L38e protein family	2	2	36	50	4	1	1	4	31	42	1.48026	0.257437	2.70222	3.88444	0.673856	2.33485	0.385408	-0.897885	1.28329		0	0	0	0	0	1	0	0	-1	0	0	0	0	0	0	0	1	-1	0	3	-1	0	5	0	-1	-1	1
PF01782	RimM	RimM N-terminal domain	1	1	16	57	0	3	2	3	15	49	0	0.683198	1.43556	4.39111	1.56796	0.478944	-0.676741	-0.310779	-0.365962		0	0	0	0	1	0	0	0	0	0	0	0	0	0	0	0	-1	0	0	0	-1	0	0	-1	0	0	0
PF01783	Ribosomal_L32p	Ribosomal L32p protein family	4	5	11	43	2	3	0	3	13	41	1.82186	0.807416	1.09778	3.71556	0.800055	0.149634	0.430536	-0.155594	0.58613		0	-1	0	0	0	0	0	0	1	0	0	0	-1	1	-1	1	-1	2	-1	0	0	0	0	0	0	-1	0
PF01784	NIF3	NIF3 (NGG1p interacting factor 3)	0	0	3	15	0	1	0	1	3	13	0	0.845865	0.253333	1.18222	0.276699	0.0304899	-0.222665	-0.0648036	-0.157862		0	0	0	0	0	0	0	0	0	0	0	0	0	0	0	0	0	0	0	0	0	0	0	0	0	0	0
PF01786	AOX	Alternative oxidase	4	6	59	58	4	6	6	7	50	46	0.845865	1.34062	4.72889	4.47556	0.12196	0.561872	-0.138514	0.343416	-0.48193		0	-1	-2	1	3	4	0	0	0	-1	0	1	0	-1	-2	-1	0	0	0	0	0	0	0	-1	0	0	3
PF01788	PsbJ	PsbJ	0	0	0	0	0	0	0	0	0	0	0	0	0	0	0	0	FALSE	FALSE	FALSE		0	0	0	0	0	0	0	0	0	0	0	0	0	0	0	0	0	0	0	0	0	0	0	0	0	0	0
PF01789	PsbP	PsbP	6	3	58	76	7	4	6	2	51	68	1.45429	0.676692	4.81333	5.91111	1.07418	0.671519	0.522873	-0.384552	0.907425		-2	0	0	0	0	-1	1	1	0	0	-1	1	0	2	0	0	1	0	1	-1	-2	0	12	0	0	-1	0
PF01791	DeoC	DeoC/LacD family aldolase	1	0	10	37	0	3	1	6	10	26	0	1.1102	0.928889	2.70222	1.01456	0.0355598	-0.50333	0.0703627	-0.573693		0	0	0	0	0	1	0	0	0	0	0	0	0	0	0	0	0	0	0	0	0	0	3	0	0	-1	0
PF01793	Glyco_transf_15	Glycolipid 2-alpha-mannosyltransferase	4	5	55	68	7	7	6	5	43	57	1.69173	1.33701	4.13778	5.23556	2.13785	0.643463	0.842533	0.374215	0.468318		-2	0	-1	2	-1	3	0	0	0	0	0	0	-1	2	-1	0	4	0	0	0	-2	17	5	-2	0	1	0
PF01794	Ferric_reduct	Ferric reductase like transmembrane component	6	9	63	76	4	9	9	5	53	66	0.764007	1.50111	5.23556	5.99556	0.316706	1.62754	-0.241395	0.694554	-0.93595		-3	-1	-1	6	3	0	1	0	-2	1	-1	0	-1	2	-1	-1	6	-1	0	0	-3	0	4	-3	0	0	2
PF01795	Methyltransf_5	MraW methylase family	4	1	48	65	3	4	8	4	39	54	0.755879	0.816697	3.96889	4.89778	0.25692	0.178681	-0.213075	-0.172302	-0.0407738		0	-1	0	1	0	0	0	0	0	0	0	0	1	0	0	0	5	1	0	0	-8	3	9	-7	1	2	0
PF01796	OB_aCoA_assoc	DUF35 OB-fold domain, acyl-CoA-associated	0	0	0	0	0	0	0	0	0	0	0	0	0	0	0	0	FALSE	FALSE	FALSE		0	0	0	0	0	0	0	0	0	0	0	0	0	0	0	0	0	0	0	0	0	0	0	0	0	0	0
PF01797	Y1_Tnp	Transposase IS200 like	0	0	1	2	0	0	0	1	1	1	0	0	0.0844444	0.168889	0.092233	0.184466	-0.118411	-0.175508	0.0570963		0	0	0	0	0	0	0	0	0	0	0	0	0	0	0	0	0	0	0	0	0	0	0	0	0	0	0
PF01798	Nop	snoRNA binding domain, fibrillarin	2	2	39	45	0	3	4	4	34	38	0	0.845865	3.20889	3.54667	3.50485	0.0914698	-1.21333	-0.117864	-1.09546		0	0	-1	2	2	0	0	0	0	0	0	0	0	0	0	0	-1	0	0	2	0	-1	3	-1	0	0	0
PF01799	Fer2_2	[2Fe-2S] binding domain	3	2	42	59	2	4	1	4	37	50	0.623269	0.877193	3.20889	4.56	0.495148	0.0746402	-0.317278	-0.105298	-0.21198		0	0	0	4	0	0	-1	0	0	0	1	-1	0	0	0	1	0	0	0	0	-3	1	3	-3	1	0	1
PF01803	LIM_bind	LIM-domain binding protein	0	0	0	6	0	0	0	0	0	5	0	0	0	0.422222	0	0.461165	FALSE	-0.303574	FALSE		0	0	0	0	0	0	0	0	0	0	0	0	0	0	0	0	0	0	0	0	0	0	0	0	0	0	0
PF01804	Penicil_amidase	Penicillin amidase	0	0	9	28	0	1	0	6	7	20	0	0.455466	0.591111	2.19556	0.645631	0.708646	-0.375018	-0.398055	0.0230375		0	0	0	0	0	0	0	0	0	0	0	0	0	0	0	0	0	0	0	0	0	0	1	0	2	0	0
PF01805	Surp	Surp module	7	4	50	67	4	6	6	5	43	56	0.966702	1.1648	4.13778	5.15111	0.00497615	0.151546	-0.0251373	0.156728	-0.181866		-1	0	-2	1	0	2	0	1	0	1	1	0	-1	1	-1	0	3	0	0	0	-3	3	0	-3	1	0	0
PF01807	zf-CHC2	CHC2 zinc finger	1	2	8	32	0	4	1	4	7	25	0	1.63339	0.675556	2.44889	0.737864	1.06122	-0.40855	0.518646	-0.927196		0	0	0	1	0	0	0	0	0	0	0	0	-1	0	0	0	-1	0	0	0	0	0	0	0	0	0	-1
PF01808	AICARFT_IMPCHas	AICARFT/IMPCHase bienzyme	0	0	34	28	1	2	2	0	28	22	0.394737	1.07656	2.53333	1.85778	1.01066	0.0118013	-0.502042	0.0392949	-0.541337		0	0	0	0	0	0	0	0	0	0	0	0	0	0	0	0	0	0	0	2	-5	4	0	-5	0	0	0
PF01809	YidD	Putative membrane protein insertion efficiency factor	2	1	5	71	0	8	0	2	7	61	0	1.50376	0.591111	5.32	0.645631	1.45943	-0.375018	0.643934	-1.01895		0	-1	0	2	0	0	0	0	0	0	0	0	0	0	0	1	0	0	0	0	-1	0	-1	0	0	0	0
PF01810	LysE	LysE type translocator	0	0	0	0	0	0	0	0	0	0	0	0	0	0	0	0	FALSE	FALSE	FALSE		0	0	0	0	0	0	0	0	0	0	0	0	0	0	0	0	0	0	0	0	0	0	0	0	0	0	0
PF01812	5-FTHF_cyc-lig	5-formyltetrahydrofolate cyclo-ligase family	6	6	30	51	1	9	2	2	33	43	0.338346	2.36842	2.95556	3.8	1.40963	7.65443	-0.628715	2.24693	-2.87565		0	0	0	1	1	1	0	2	1	-1	-1	-1	-1	-1	-1	0	1	0	0	0	0	1	2	-1	1	-1	0
PF01813	ATP-synt_D	ATP synthase subunit D	3	0	22	31	1	1	5	0	18	28	0.514874	0.422932	1.94222	2.36444	0.497344	0.857272	-0.318154	-0.45038	0.132226		0	0	0	1	0	0	0	0	0	0	1	0	0	0	0	0	0	1	0	2	0	0	2	-1	0	0	0
PF01814	Hemerythrin	Hemerythrin HHE cation binding domain	4	3	47	55	6	2	3	7	40	45	1.65239	0.455466	3.63111	4.39111	1.66912	1.41729	0.706911	-0.631063	1.33797		-1	0	0	0	0	1	0	1	0	0	1	-1	0	2	0	0	0	-1	0	3	0	-1	2	-1	0	0	6
PF01817	CM_2	Chorismate mutase type II	0	0	11	58	0	5	2	7	9	44	0	1.16099	0.928889	4.30667	1.01456	0.12092	-0.50333	0.137845	-0.641175		0	0	0	0	0	0	0	0	0	0	0	0	0	0	0	0	0	0	0	0	0	0	0	0	0	0	0
PF01820	Dala_Dala_lig_N	D-ala D-ala ligase N-terminus	0	5	7	27	1	5	0	5	6	20	1.97368	2.36842	0.506667	2.11111	0.517832	4.25246	0.326272	1.40679	-1.08052		0	0	0	0	0	0	0	-1	0	0	-1	-1	0	-1	0	0	-1	0	0	0	0	0	0	0	0	0	0
PF01822	WSC	WSC domain	2	2	38	52	1	6	5	3	31	42	0.328947	1.57895	3.04	3.8	1.49149	1.37623	-0.653676	0.618443	-1.27212		0	0	0	0	0	0	0	0	0	0	-1	0	0	-1	0	0	1	1	0	0	-5	1	0	-8	2	2	-1
PF01823	MACPF	MAC/Perforin domain	2	9	34	47	0	9	2	8	33	35	0	2.47858	2.95556	3.63111	3.22816	8.53427	-1.14037	2.45777	-3.59814		0	-1	0	3	-1	0	0	-1	0	0	-1	-1	-1	-1	-1	0	6	0	-1	-1	0	-1	3	0	0	0	1
PF01825	GPS	GPCR proteolysis site, GPS, motif	5	2	38	41	6	3	3	3	32	33	2.03008	0.986842	2.95556	3.04	3.37963	0.00057081	1.18041	-0.00835797	1.18877		0	3	1	-5	0	0	0	0	0	0	-1	0	4	1	0	0	13	0	0	0	-2	1	2	-1	7	0	0
PF01826	TIL	Trypsin Inhibitor like cysteine rich domain	2	4	5	21	0	5	0	3	7	15	0	3.28947	0.591111	1.52	0.645631	8.53117	-0.375018	2.45703	-2.83205		0	-1	0	1	0	0	0	0	1	0	-1	0	-1	0	0	0	-1	0	0	0	0	0	0	0	0	0	0
PF01833	TIG	IPT/TIG domain	7	8	70	108	8	8	10	10	56	93	1.43541	0.919775	5.57333	8.69778	1.14265	0.0607385	0.545012	-0.0940248	0.639037		0	22	29	-9	1	-5	-3	2	0	0	8	-4	-6	1	-1	-1	0	-1	1	-1	-4	0	9	1	4	-1	0
PF01835	MG2	MG2 domain	0	0	11	41	0	3	1	7	10	30	0	0.960171	0.928889	3.12444	1.01456	0.0053765	-0.50333	-0.0261576	-0.477173		0	0	0	0	0	0	0	0	0	0	0	0	0	0	0	0	0	0	0	0	0	0	0	0	0	0	0
PF01839	FG-GAP	FG-GAP repeat	5	4	155	30	11	4	14	2	127	26	0.923852	1.69173	11.9067	2.36444	0.0749085	1.22163	-0.105507	0.57018	-0.675687		0	19	1	-2	0	0	0	0	0	1	20	0	-3	0	0	0	-2	1	-1	3	4	5	8	0	4	3	4
PF01841	Transglut_core	Transglutaminase-like superfamily	4	5	53	70	5	8	5	6	45	56	1.18421	1.52801	4.22222	5.23556	0.155188	1.57766	0.158875	0.679651	-0.520776		-1	-1	-1	1	0	1	0	0	0	-1	-1	0	1	1	0	0	0	0	0	0	-5	4	4	-5	-1	-1	1
PF01842	ACT	ACT domain	4	6	67	71	4	7	6	7	59	58	0.728745	1.2753	5.48889	5.48889	0.438773	0.450346	-0.29438	0.299149	-0.593528		-1	1	-1	-1	0	0	0	1	0	2	1	0	0	0	-1	0	-1	0	-1	0	-1	5	1	-1	0	-1	1
PF01843	DIL	DIL domain	0	0	0	0	0	0	0	0	0	0	0	0	0	0	0	0	FALSE	FALSE	FALSE		0	0	0	0	0	0	0	0	0	0	0	0	0	0	0	0	0	0	0	0	0	0	0	0	0	0	0
PF01844	HNH	HNH endonuclease	5	3	35	67	2	5	2	3	34	59	0.657895	0.955008	3.04	5.23556	0.386728	0.0114964	-0.272439	-0.0387623	-0.233676		0	-4	0	9	0	0	0	0	0	0	-1	0	0	1	0	1	9	1	-1	0	-1	0	5	0	0	-1	1
PF01846	FF	FF domain	2	1	42	52	2	4	5	5	34	41	0.607287	1.02975	3.29333	3.88444	0.552269	0.00372714	-0.339712	0.0216738	-0.361385		-1	0	0	0	0	0	0	0	1	0	0	0	0	0	0	0	1	0	0	2	-1	0	0	0	0	0	2
PF01847	VHL	VHL beta domain	1	6	4	11	0	3	1	0	4	14	0	2.53759	0.422222	1.18222	0.461165	3.0039	-0.303574	1.08059	-1.38416		0	0	-1	0	0	0	0	2	-1	0	-1	-1	0	0	0	0	-1	0	-1	0	0	0	0	0	0	0	0
PF01849	NAC	NAC domain	6	3	46	48	6	7	3	3	40	37	1.65239	2.07237	3.63111	3.37778	1.66912	4.18513	0.706911	1.38955	-0.682642		1	-1	-1	0	0	1	0	0	0	-1	1	1	1	0	0	0	1	0	0	1	1	-1	12	-3	-2	0	0
PF01851	PC_rep	Proteasome/cyclosome repeat	4	6	47	39	3	5	3	2	44	35	0.755879	1.60028	3.96889	3.12444	0.25692	1.21635	-0.213075	0.568512	-0.781587		1	0	0	2	0	0	-1	0	0	0	1	0	-1	-1	-1	0	-2	1	-1	0	0	0	2	-1	0	0	0
PF01852	START	START domain	5	7	51	65	3	10	7	7	41	51	0.740132	2.04174	4.05333	4.89778	0.297362	5.72775	-0.232442	1.77731	-2.00976		0	-1	-2	6	0	3	1	0	-1	1	3	-2	-1	-1	0	0	0	0	-1	0	-2	1	2	-5	2	0	0
PF01853	MOZ_SAS	MOZ/SAS family	2	3	37	47	5	3	4	5	28	40	1.85033	0.789474	2.70222	3.8	2.10781	0.182901	0.834016	-0.174644	1.00866		0	0	-1	0	0	0	0	0	0	0	1	0	-1	0	0	0	-2	1	0	0	0	0	0	0	0	0	4
PF01855	POR_N	Pyruvate flavodoxin/ferredoxin oxidoreductase, thiamine diP-bdg	1	3	15	37	0	6	1	2	15	27	0	2.45009	1.35111	2.44889	1.47573	5.53684	-0.648892	1.73002	-2.37891		0	0	-1	0	0	0	0	0	0	0	-1	0	0	0	0	0	6	-1	0	0	-2	1	4	-2	0	-1	0
PF01857	RB_B	Retinoblastoma-associated protein B domain	3	5	19	37	3	4	2	7	16	29	1.97368	1.31579	1.52	3.04	1.5535	0.328093	0.672396	0.246582	0.425814		0	0	1	0	-1	0	0	1	-1	0	-1	0	1	0	0	0	-1	-1	0	0	0	0	0	0	0	0	0
PF01858	RB_A	Retinoblastoma-associated protein A domain	0	3	13	34	1	3	2	4	10	28	0.986842	1.1102	1.01333	2.70222	0.00019027	0.0355598	-0.00480614	0.0703627	-0.0751688		0	0	0	0	-1	0	0	0	0	0	-1	0	0	0	0	0	-1	0	0	0	0	0	0	0	0	0	0
PF01862	PvlArgDC	Pyruvoyl-dependent arginine decarboxylase (PvlArgDC)	0	0	0	0	0	0	0	0	0	0	0	0	0	0	0	0	FALSE	FALSE	FALSE		0	0	0	0	0	0	0	0	0	0	0	0	0	0	0	0	0	0	0	0	0	0	0	0	0	0	0
PF01863	DUF45	Protein of unknown function DUF45	2	3	8	31	0	6	2	4	7	24	0	2.53759	0.76	2.36444	0.830097	6.00781	-0.440998	1.84641	-2.28741		-1	0	0	0	1	0	0	0	0	0	0	0	-1	0	-1	0	2	0	0	0	-1	0	1	0	0	0	0
PF01864	CarS-like	CDP-archaeol synthase	0	0	0	10	0	0	0	2	0	8	0	0	0	0.844444	0	0.92233	FALSE	-0.472546	FALSE		0	0	0	0	0	0	0	0	0	0	0	0	0	0	0	0	0	0	0	0	0	0	0	0	0	0	0
PF01866	Diphthamide_syn	Putative diphthamide synthesis protein	2	4	41	70	4	8	4	8	31	54	1.35338	1.52801	2.95556	5.23556	0.399354	1.57766	0.277841	0.679651	-0.40181		-1	0	1	0	1	0	0	0	0	0	-1	0	0	0	-1	0	0	-1	0	2	-1	0	0	-2	0	0	1
PF01868	UPF0086	Domain of unknown function UPF0086	0	6	5	40	0	2	0	2	4	40	0	0.56391	0.337778	3.54667	0.368932	0.73362	-0.264731	-0.407033	0.142302		0	-1	0	0	0	-1	0	0	-1	0	-1	-1	0	0	0	0	0	0	-1	0	0	1	-1	0	-1	0	0
PF01869	BcrAD_BadFG	BadF/BadG/BcrA/BcrD ATPase family	0	0	2	44	0	2	0	2	2	36	0	0.623269	0.168889	3.20889	0.184466	0.495148	-0.175508	-0.317278	0.14177		0	0	0	0	0	0	0	0	0	0	0	0	0	0	0	0	0	0	0	0	-1	0	-1	0	-1	0	0
PF01871	AMMECR1	AMMECR1	1	3	20	33	0	3	1	3	19	28	0	1.14601	1.68889	2.61778	1.84466	0.0604636	-0.758439	0.0937918	-0.852231		0	0	0	0	0	0	-1	0	0	0	-1	-1	0	0	0	0	3	0	0	0	-3	1	0	-2	0	0	0
PF01872	RibD_C	RibD C-terminal domain	5	6	46	59	6	6	0	4	43	53	1.65239	1.24654	3.63111	4.81333	1.66912	0.316759	0.706911	0.24142	0.465491		-1	-1	0	1	0	0	-1	0	-1	1	-1	-1	0	1	0	1	2	0	0	0	-1	1	1	-1	-1	-1	0
PF01873	eIF-5_eIF-2B	Domain found in IF2B/IF5	5	0	50	39	4	3	3	2	46	30	0.966702	1.1102	4.13778	2.70222	0.00497615	0.0355598	-0.0251373	0.0703627	-0.0955		0	0	0	1	1	1	0	0	0	0	1	0	0	0	0	0	1	0	0	0	-2	6	6	-3	0	0	1
PF01875	Memo	Memo-like protein	2	6	27	40	0	5	5	2	22	35	0	1.60028	2.28	3.12444	2.49029	1.21635	-0.941003	0.568512	-1.50951		0	-1	-1	0	1	0	-1	0	0	0	-1	-1	0	0	0	0	4	-1	0	0	-2	3	4	-1	0	1	0
PF01876	RNase_P_p30	RNase P subunit p30	0	5	8	68	0	6	1	6	6	59	0	1.09312	0.591111	5.48889	0.645631	0.051581	-0.375018	0.0860089	-0.461027		-1	-1	-1	0	0	0	0	0	0	0	0	0	0	0	0	0	-1	-1	0	0	0	0	0	-1	0	-1	0
PF01878	EVE	EVE domain	0	6	4	47	0	4	0	6	3	38	0	1.07656	0.253333	3.71556	0.276699	0.0236027	-0.222665	0.0565548	-0.27922		0	-1	0	0	0	0	-1	0	0	0	0	-1	-1	0	0	0	-1	-1	0	0	0	0	0	0	0	0	0
PF01880	Desulfoferrodox	Desulfoferrodoxin	0	5	22	34	3	5	1	3	17	31	1.97368	1.74149	1.52	2.87111	1.5535	1.70399	0.672396	0.717225	-0.0448291		-1	0	-1	-1	0	0	0	0	0	0	-1	0	0	0	0	0	-1	0	0	4	0	1	-1	-2	0	1	0
PF01882	DUF58	Protein of unknown function DUF58	0	0	1	10	0	0	0	4	1	5	0	0	0.0844444	0.76	0.092233	0.830097	-0.118411	-0.440998	0.322587		0	0	0	0	0	0	0	0	0	0	0	0	0	0	0	0	0	0	0	0	0	0	0	0	0	0	0
PF01883	FeS_assembly_P	Iron-sulfur cluster assembly protein	3	3	33	54	4	3	3	4	27	47	1.57895	0.696594	2.53333	4.30667	0.917484	0.430808	0.470908	-0.291076	0.761984		-1	0	0	0	0	0	0	1	0	0	2	0	0	0	0	-2	-1	1	0	0	-1	1	1	0	0	0	0
PF01884	PcrB	PcrB family	0	0	1	26	0	3	0	4	1	18	0	1.61483	0.0844444	1.85778	0.092233	0.758652	-0.118411	0.415951	-0.534362		0	0	0	0	0	0	0	0	0	0	0	0	0	0	0	0	0	0	0	0	-1	0	1	0	0	0	0
PF01885	PTS_2-RNA	RNA 2'-phosphotransferase, Tpt1 / KptA family	2	3	31	53	1	7	2	3	27	42	0.408348	1.84211	2.44889	3.8	0.933433	2.90718	-0.476289	1.0546	-1.53089		0	1	-1	0	0	0	0	0	0	0	-1	-1	0	0	0	0	104	0	0	0	-11	11	4	-10	2	0	-1
PF01887	SAM_adeno_trans	S-adenosyl-l-methionine hydroxide adenosyltransferase	0	0	0	0	0	0	0	0	0	0	0	0	0	0	0	0	FALSE	FALSE	FALSE		0	0	0	0	0	0	0	0	0	0	0	0	0	0	0	0	0	0	0	0	0	0	0	0	0	0	0
PF01888	CbiD	CbiD	0	0	0	0	0	0	0	0	0	0	0	0	0	0	0	0	FALSE	FALSE	FALSE		0	0	0	0	0	0	0	0	0	0	0	0	0	0	0	0	0	0	0	0	0	0	0	0	0	0	0
PF01894	UPF0047	Uncharacterised protein family UPF0047	2	2	33	53	4	1	2	3	29	47	1.52801	0.236842	2.61778	4.22222	0.788832	2.68102	0.426602	-0.993318	1.41992		-1	0	0	0	0	0	0	0	0	0	0	0	0	1	0	0	0	1	-1	0	-1	2	0	0	-1	0	0
PF01896	DNA_primase_S	DNA primase small subunit	3	2	23	40	1	2	4	3	21	34	0.473684	0.640114	2.11111	3.12444	0.636475	0.439915	-0.371621	-0.294852	-0.0767689		0	0	0	1	1	0	0	0	0	0	-1	1	0	0	0	0	-1	0	0	0	0	0	5	0	0	0	0
PF01900	RNase_P_Rpp14	Rpp14/Pop5 family	5	3	20	71	3	3	0	5	19	62	1.86981	0.530244	1.60444	5.65778	1.30935	1.35829	0.597718	-0.612907	1.21062		-1	0	1	0	0	0	0	0	1	0	0	0	1	0	-1	1	1	0	-1	0	0	4	5	0	0	-1	0
PF01902	Diphthami_syn_2	Diphthamide synthase	4	4	43	75	5	7	5	5	35	63	1.48026	1.21904	3.37778	5.74222	0.84232	0.298346	0.445227	0.232903	0.212324		0	-2	0	2	1	0	0	0	1	0	-1	-1	0	0	0	0	0	-1	1	0	0	2	1	0	1	0	0
PF01903	CbiX	CbiX	0	2	18	49	1	1	1	1	15	46	0.740132	0.25196	1.35111	3.96889	0.0991205	2.42103	-0.12327	-0.921848	0.798578		0	0	-1	0	0	0	0	0	0	0	0	0	0	0	0	0	-1	0	0	0	0	0	0	0	0	0	-1
PF01904	DUF72	Protein of unknown function DUF72	2	4	18	47	0	5	2	2	17	40	0	1.40977	1.60444	3.54667	1.75243	0.644147	-0.731488	0.374468	-1.10596		-1	0	0	1	0	0	-1	0	0	0	-1	0	-1	0	0	0	2	0	0	0	-3	1	1	-2	1	0	0
PF01906	YbjQ_1	Putative heavy-metal-binding	0	1	10	37	0	4	0	4	8	29	0	1.43541	0.675556	2.78667	0.737864	0.571323	-0.40855	0.347045	-0.755595		0	0	0	0	0	0	0	0	0	0	0	0	-1	0	0	0	0	0	0	2	0	0	3	-2	0	-1	0
PF01907	Ribosomal_L37e	Ribosomal protein L37e	2	1	17	57	3	2	2	4	13	48	2.36842	0.455466	1.26667	4.39111	2.55148	1.41729	0.957853	-0.631063	1.58892		0	0	0	1	0	0	0	0	-1	0	1	0	0	0	0	0	0	0	0	0	1	0	2	0	0	0	0
PF01909	NTP_transf_2	Nucleotidyltransferase domain	5	5	52	70	3	6	3	8	48	58	0.696594	1.07656	4.30667	5.57333	0.430808	0.035404	-0.291076	0.0701972	-0.361273		0	-2	0	5	0	1	1	0	0	-1	-1	0	-2	0	2	0	6	0	-1	0	-5	3	1	-5	-1	0	0
PF01910	Thiamine_BP	Thiamine-binding protein	0	0	5	19	1	0	0	0	4	19	2.96053	0	0.337778	1.60444	1.39237	1.75243	0.623412	-0.731488	1.3549		0	0	0	0	0	0	0	0	0	0	0	0	0	0	0	0	0	0	0	0	-1	-1	0	-1	0	0	0
PF01912	eIF-6	eIF-6 family	2	1	26	35	0	2	2	2	26	27	0	0.816697	2.36444	2.44889	2.58252	0.0893403	-0.966378	-0.116329	-0.85005		0	-1	0	1	0	0	0	0	0	0	0	1	0	0	0	0	0	0	0	1	0	-1	1	0	0	-1	2
PF01914	MarC	MarC family integral membrane protein	0	0	1	10	0	2	0	1	1	6	0	3.38346	0.0844444	0.591111	0.092233	3.59408	-0.118411	1.23668	-1.35509		0	0	0	0	0	0	0	0	0	0	0	0	0	0	0	0	0	0	0	0	0	0	0	0	0	0	0
PF01915	Glyco_hydro_3_C	Glycosyl hydrolase family 3 C-terminal domain	4	5	127	18	7	4	12	2	104	16	0.71461	2.63158	9.79556	1.52	0.86686	4.34663	-0.453672	1.43083	-1.88451		1	-1	0	10	1	-1	0	0	0	0	-2	0	-3	0	0	0	12	0	-1	70	23	69	54	10	6	2	3
PF01916	DS	Deoxyhypusine synthase	1	2	22	30	0	3	1	1	20	27	0	1.2688	1.77333	2.36444	1.93689	0.184941	-0.78514	0.17577	-0.960909		-1	0	-1	1	0	0	0	0	0	0	0	0	0	0	0	0	0	0	0	0	0	0	1	0	0	0	0
PF01918	Alba	Alba	3	3	21	42	1	4	2	1	19	39	0.56391	1.18421	1.77333	3.37778	0.36681	0.124151	-0.263804	0.139916	-0.403721		0	0	1	0	0	0	0	0	-1	2	-1	0	0	0	0	0	2	0	-1	2	-2	0	0	-2	0	-1	0
PF01920	Prefoldin_2	Prefoldin subunit	5	4	51	51	5	4	5	1	42	47	1.2598	0.986842	3.96889	4.05333	0.290016	0.00076108	0.228993	-0.00966513	0.238659		0	-3	-1	2	0	1	0	0	0	0	-1	0	0	0	0	1	2	1	-1	0	0	0	12	-1	1	-1	0
PF01921	tRNA-synt_1f	tRNA synthetases class I (K)	0	0	12	42	1	2	0	5	10	33	1.18421	0.623269	0.844444	3.20889	0.0310377	0.495148	0.0654226	-0.317278	0.3827		0	0	0	0	0	0	0	0	0	0	0	0	0	0	0	0	0	0	0	0	-1	0	-1	-1	0	0	0
PF01922	SRP19	SRP19 protein	3	2	16	35	0	3	3	0	16	32	0	1.1102	1.60444	2.70222	1.75243	0.0355598	-0.731488	0.0703627	-0.801851		1	0	0	1	1	0	0	0	0	-1	-1	0	0	0	0	0	0	0	0	-1	0	0	1	0	0	0	0
PF01923	Cob_adeno_trans	Cobalamin adenosyltransferase	2	1	24	51	2	3	3	2	21	43	0.986842	0.789474	2.02667	3.8	0.00038054	0.182901	-0.00681238	-0.174644	0.167831		0	0	0	1	0	0	0	0	0	0	0	0	0	0	0	1	-1	0	0	0	0	1	2	-1	0	0	0
PF01925	TauE	Sulfite exporter TauE/SafE	8	9	166	30	11	3	15	3	140	32	0.840407	1.01504	13.0889	2.95556	0.361907	0.000724703	-0.261656	0.00942883	-0.271085		-3	-1	0	5	2	1	-1	1	-1	1	-1	0	-1	3	-1	-1	4	-1	2	21	15	25	23	3	10	6	5
PF01926	MMR_HSR1	50S ribosome-binding GTPase	10	9	214	20	13	6	20	0	180	23	0.769737	3.08924	16.8889	1.94222	0.972585	9.08622	-0.489406	2.58915	-3.07856		-2	-9	-13	16	7	15	1	1	-5	4	9	-6	-8	4	-6	-3	14	-3	1	120	14	136	254	4	85	25	45
PF01927	Mut7-C	Mut7-C RNAse domain	2	4	28	57	1	5	3	4	23	50	0.455466	1.09649	2.19556	4.56	0.708646	0.0460123	-0.398055	0.0808417	-0.478897		-1	0	-1	1	0	0	0	0	0	0	0	-1	0	1	0	0	0	0	-1	0	-2	2	0	-2	0	0	0
PF01928	CYTH	CYTH domain	2	3	14	68	1	4	1	8	13	55	0.845865	0.75188	1.18222	5.32	0.0304899	0.355768	-0.0648036	-0.258954	0.19415		-1	0	-1	1	0	0	0	0	-1	0	1	0	0	0	0	0	0	0	0	0	0	0	0	0	0	0	-1
PF01929	Ribosomal_L14e	Ribosomal protein L14	1	1	33	42	3	1	2	2	27	35	1.22505	0.320057	2.44889	3.12444	0.134303	1.57391	0.146295	-0.678526	0.824821		0	0	0	0	0	0	0	0	0	0	0	0	0	0	0	0	-1	1	0	8	-1	0	11	-3	-1	0	0
PF01930	Cas_Cas4	Domain of unknown function DUF83	0	0	0	4	0	0	0	0	0	4	0	0	0	0.337778	0	0.368932	FALSE	-0.264731	FALSE		0	0	0	0	0	0	0	0	0	0	0	0	0	0	0	0	0	0	0	0	0	0	0	0	0	0	0
PF01931	NTPase_I-T	Protein of unknown function DUF84	4	2	29	60	3	2	2	4	25	52	1.31579	0.422932	2.28	4.72889	0.24607	1.71454	0.207709	-0.72034	0.928049		0	0	0	1	1	0	0	0	0	-1	1	0	0	0	-1	0	1	0	0	0	1	1	0	-2	0	0	0
PF01933	UPF0052	Uncharacterised protein family UPF0052	1	5	9	43	1	6	0	5	8	36	1.48026	1.73299	0.675556	3.46222	0.168464	2.00809	0.166546	0.805591	-0.639045		0	0	-1	0	-1	0	0	0	0	0	-1	0	0	0	-1	0	-1	2	0	0	0	0	0	0	0	0	0
PF01935	DUF87	Helicase HerA, central domain	0	0	6	41	0	3	2	7	4	31	0	0.934903	0.506667	3.20889	0.553398	0.0147527	-0.340148	-0.0441553	-0.295993		0	0	0	0	0	0	0	0	0	0	0	0	0	0	0	0	0	0	0	0	-1	0	-1	0	0	0	0
PF01936	NYN	NYN domain	6	7	45	58	8	6	4	8	36	48	2.36842	1.2688	3.37778	4.72889	6.80394	0.369883	2.04116	0.265146	1.77602		-1	2	4	0	-1	-1	1	-1	0	0	4	-1	-1	1	0	0	2	0	-1	0	-2	0	6	-1	0	0	2
PF01937	DUF89	Protein of unknown function DUF89	1	2	39	40	2	3	4	3	32	33	0.657895	0.986842	3.04	3.04	0.386728	0.00057081	-0.272439	-0.00835797	-0.264081		0	-1	-2	1	0	0	0	0	0	0	0	0	0	0	0	0	0	0	0	-1	0	0	1	0	0	0	0
PF01938	TRAM	TRAM domain	2	5	33	52	5	5	1	5	29	44	1.97368	1.20838	2.53333	4.13778	2.58916	0.194578	0.968198	0.181027	0.787172		0	-1	0	0	0	0	-1	0	0	0	-2	1	1	0	-1	0	-2	0	0	0	-1	0	0	0	0	0	1
PF01940	DUF92	Integral membrane protein DUF92	3	5	35	59	1	5	2	3	33	53	0.338346	1.05733	2.95556	4.72889	1.40963	0.0168492	-0.628715	0.0473426	-0.676057		0	-1	-2	1	0	0	0	-1	0	0	0	0	1	-1	0	0	-2	0	1	0	0	0	0	0	0	0	0
PF01943	Polysacc_synt	Polysaccharide biosynthesis protein	0	0	3	15	0	1	0	2	3	12	0	0.845865	0.253333	1.18222	0.276699	0.0304899	-0.222665	-0.0648036	-0.157862		0	0	0	0	0	0	0	0	0	0	0	0	0	0	0	0	0	0	0	0	0	0	0	0	1	0	0
PF01946	Thi4	Thi4 family	4	5	64	68	6	4	7	7	54	57	1.1648	0.740132	5.15111	5.40444	0.151546	0.396482	0.156728	-0.276617	0.433345		0	-3	-1	4	0	1	0	-1	0	-1	0	0	0	0	0	0	1	3	-1	1	-4	0	10	-4	0	0	6
PF01947	DUF98	p-hydroxybenzoic acid synthase	0	0	0	0	0	0	0	0	0	0	0	0	0	0	0	0	FALSE	FALSE	FALSE		0	0	0	0	0	0	0	0	0	0	0	0	0	0	0	0	0	0	0	0	0	0	0	0	0	0	0
PF01951	Archease	Archease protein family (MTH1598/TM1083)	1	5	10	52	0	9	1	4	8	40	0	2.42225	0.76	3.71556	0.830097	8.08241	-0.440998	2.34972	-2.79072		0	-1	-1	0	0	0	0	0	0	0	-1	0	-1	0	0	0	2	-1	0	-1	-2	1	0	0	-1	0	0
PF01955	CbiZ	Adenosylcobinamide amidohydrolase	0	4	0	0	0	2	0	0	0	2	0	11.8421	0	0.168889	0	20.7283	FALSE	5.27631	FALSE		0	0	-1	0	0	0	0	0	0	0	-1	0	0	0	-1	0	-1	0	0	0	0	0	0	0	0	0	0
PF01956	EMC3_TMCO1	Integral membrane protein EMC3/TMCO1-like	2	2	29	32	0	0	2	2	25	30	0	0	2.28	2.70222	2.49029	2.95146	-0.941003	-1.06651	0.125509		0	1	0	0	-1	0	0	0	0	1	0	0	0	0	0	0	-1	0	0	0	0	0	3	0	0	0	-1
PF01958	DUF108	Domain of unknown function DUF108	1	7	3	32	0	5	1	2	2	30	0	1.85033	0.253333	2.70222	0.276699	2.10781	-0.222665	0.834016	-1.05668		0	-1	0	2	-1	0	0	0	0	0	-1	0	-1	-1	-1	0	-1	0	0	0	0	-1	0	-1	0	0	0
PF01959	DHQS	3-dehydroquinate synthase II	1	4	17	57	0	6	3	4	15	50	0	1.31579	1.52	4.56	1.66019	0.492139	-0.704263	0.316076	-1.02034		0	0	0	0	0	0	0	0	0	0	-1	0	-1	-1	-1	0	1	0	0	0	-1	0	-1	0	0	0	0
PF01960	ArgJ	ArgJ family	2	2	26	18	2	0	4	0	22	17	0.910931	0	2.19556	1.43556	0.0188999	1.56796	-0.050291	-0.676741	0.62645		-1	0	0	0	0	0	0	0	0	0	1	0	0	0	0	0	-1	2	0	0	-1	0	0	-1	0	0	0
PF01963	TraB	TraB family	4	2	66	67	9	3	6	3	53	59	1.80642	0.573005	4.98222	5.23556	3.49619	1.03819	1.21105	-0.511108	1.72216		0	0	0	0	0	1	0	0	0	0	1	-1	1	-1	0	0	0	0	1	0	-4	3	2	-1	0	2	0
PF01964	ThiC_Rad_SAM	Radical SAM ThiC family	0	0	23	29	0	2	2	2	21	23	0	0.947368	1.94222	2.11111	2.12136	0.00634398	-0.837861	-0.0284847	-0.809377		0	0	0	0	0	0	0	0	0	0	0	0	0	0	0	0	0	0	0	1	-3	1	10	-2	0	0	0
PF01965	DJ-1_PfpI	DJ-1/PfpI family	5	1	58	72	4	5	7	6	49	58	0.845865	0.925164	4.72889	5.40444	0.12196	0.0328389	-0.138514	-0.0674254	-0.0710888		0	-2	2	5	2	0	0	0	0	0	0	0	0	0	0	0	2	1	0	0	-1	0	7	-3	0	-1	0
PF01966	HD	HD domain	7	5	56	71	4	6	8	6	50	60	0.816697	1.07656	4.89778	5.57333	0.178681	0.035404	-0.172302	0.0701972	-0.242499		1	0	1	3	1	0	-1	1	0	1	0	-1	-2	-1	-1	0	1	0	0	0	-2	1	0	-1	2	0	0
PF01967	MoaC	MoaC family	2	1	22	46	0	4	4	2	20	39	0	1.15533	2.02667	3.46222	2.21359	0.090494	-0.863915	0.117163	-0.981077		0	0	-1	1	0	0	0	0	0	0	0	1	0	0	0	0	0	0	0	2	0	0	0	-1	0	0	3
PF01968	Hydantoinase_A	Hydantoinase/oxoprolinase	0	5	41	54	3	7	4	3	33	44	0.960171	1.76372	3.12444	3.96889	0.0053765	2.49855	-0.0261576	0.943282	-0.969439		-1	-1	-1	0	0	0	0	0	0	0	-1	0	-1	0	0	0	0	0	0	0	-1	2	4	-1	0	-1	0
PF01969	DUF111	Protein of unknown function DUF111	2	3	23	24	2	4	3	2	20	19	1.02975	2.25564	1.94222	1.77333	0.00186357	3.00935	0.0152177	1.08205	-1.06683		0	0	0	0	0	0	-1	1	0	0	0	-1	0	0	0	0	-1	1	0	0	0	0	0	0	0	0	0
PF01972	SDH_sah	Serine dehydrogenase proteinase	1	7	2	25	1	4	1	5	1	22	5.92105	1.75439	0.168889	2.28	4.33393	1.40055	1.42759	0.625928	0.801665		-1	0	0	0	-1	-1	-1	0	0	0	0	-1	-1	1	0	0	-1	0	0	0	0	0	0	0	0	0	0
PF01973	MAF_flag10	Protein of unknown function DUF115	0	0	2	2	0	1	0	1	1	0	0	11.8421	0.0844444	0.0844444	0.092233	10.3641	-0.118411	2.89114	-3.00955		0	0	0	0	0	0	0	0	0	0	0	0	0	0	0	0	0	0	0	0	0	0	0	0	0	0	0
PF01974	tRNA_int_endo	tRNA intron endonuclease, catalytic C-terminal domain	4	3	34	57	4	6	3	5	28	47	1.52801	1.3664	2.61778	4.39111	0.788832	0.637777	0.426602	0.372105	0.054497		0	-1	-1	1	1	0	0	0	0	0	0	0	-1	1	0	0	0	2	0	0	0	1	-1	0	-1	-1	1
PF01975	SurE	Survival protein SurE	0	5	6	32	0	5	1	5	5	25	0	1.97368	0.506667	2.53333	0.553398	2.58916	-0.340148	0.968198	-1.30835		0	0	0	0	-1	0	0	0	0	0	-1	-1	0	0	-1	0	-1	0	0	0	0	0	0	0	0	-1	0
PF01978	TrmB	Sugar-specific transcriptional regulator TrmB	0	0	3	30	0	4	0	4	3	20	0	1.97368	0.253333	2.02667	0.276699	2.07133	-0.222665	0.823646	-1.04631		0	0	0	0	0	0	0	0	0	0	0	0	0	0	0	0	0	0	0	0	0	0	0	0	0	0	0
PF01979	Amidohydro_1	Amidohydrolase family	7	7	75	70	6	9	6	6	65	61	1.00074	1.59073	5.99556	5.65778	3.57282e-06	2.13315	0.000655477	0.841204	-0.840548		4	-1	-3	5	0	4	-2	3	0	0	0	-1	-1	-2	1	0	6	-1	1	0	-1	9	14	-7	1	0	2
PF01980	TrmO	tRNA-methyltransferase O	5	4	52	65	7	4	7	5	40	57	1.76372	0.764007	3.96889	5.23556	2.49855	0.316706	0.943282	-0.241395	1.18468		1	-1	-1	5	0	2	-1	0	0	0	1	0	0	0	-1	0	1	0	0	1	0	1	1	-1	-1	0	2
PF01981	PTH2	Peptidyl-tRNA hydrolase PTH2	4	4	45	49	6	2	4	2	35	46	1.82186	0.493421	3.29333	4.05333	2.40016	1.13194	0.916058	-0.54157	1.45763		0	-3	-1	0	1	1	0	0	0	0	-1	0	1	0	0	0	2	0	-1	0	-2	1	3	-2	0	0	-1
PF01982	CTP-dep_RFKase	Domain of unknown function DUF120	0	0	0	0	0	0	0	0	0	0	0	0	0	0	0	0	FALSE	FALSE	FALSE		0	0	0	0	0	0	0	0	0	0	0	0	0	0	0	0	0	0	0	0	0	0	0	0	0	0	0
PF01983	CofC	Guanylyl transferase CofC like	0	0	0	0	0	0	0	0	0	0	0	0	0	0	0	0	FALSE	FALSE	FALSE		0	0	0	0	0	0	0	0	0	0	0	0	0	0	0	0	0	0	0	0	0	0	0	0	0	0	0
PF01984	dsDNA_bind	Double-stranded DNA-binding domain	2	5	19	31	2	2	1	1	16	30	1.39319	0.764007	1.43556	2.61778	0.240072	0.158353	0.204708	-0.160725	0.365433		1	-1	0	0	0	1	0	-1	0	0	0	-1	0	0	0	0	-1	-1	0	0	0	0	1	0	0	-1	0
PF01985	CRS1_YhbY	CRS1 / YhbY (CRM) domain	1	5	12	42	1	4	2	5	10	34	0.986842	1.21457	1.01333	3.29333	0.00019027	0.16421	-0.00480614	0.164113	-0.168919		0	-1	-1	0	-1	0	0	0	0	1	0	0	0	0	-1	0	-1	0	0	0	0	0	0	0	0	0	0
PF01987	AIM24	Mitochondrial biogenesis AIM24	5	6	52	59	4	8	5	2	46	53	0.928793	1.72249	4.30667	4.64444	0.0236921	2.6173	-0.0566683	0.975908	-1.03258		0	-3	-2	1	2	3	0	0	-1	1	-2	0	3	0	0	0	-1	-1	0	2	0	0	5	0	-1	0	2
PF01988	VIT1	VIT family	4	5	48	44	4	3	3	5	42	37	1.05263	0.845865	3.8	3.54667	0.0114113	0.0914698	0.0386126	-0.117864	0.156477		-1	0	0	0	0	0	0	0	-1	1	-1	0	1	2	2	-1	-2	0	0	0	-1	0	2	0	0	0	0
PF01989	DUF126	Aconitase X swivel domain	1	4	3	43	0	6	0	5	3	34	0	1.82186	0.253333	3.29333	0.276699	2.40016	-0.222665	0.916058	-1.13872		0	-1	0	1	0	0	0	0	0	0	-1	0	-1	0	0	0	-1	0	0	0	0	0	0	0	0	0	0
PF01990	ATP-synt_F	ATP synthase (F/14-kDa) subunit	1	1	22	52	2	1	2	3	16	46	1.31579	0.241676	1.52	4.13778	0.164046	2.59413	0.164019	-0.969562	1.13358		0	-1	0	0	0	0	0	0	0	0	0	0	0	1	0	0	0	0	0	1	0	0	1	-1	0	0	0
PF01991	vATP-synt_E	ATP synthase (E/31 kDa) subunit	1	2	33	32	2	2	1	1	29	29	0.789474	0.789474	2.53333	2.53333	0.121934	0.121934	-0.138498	-0.138498	0		0	-1	0	0	0	0	0	0	-1	0	0	0	0	0	0	0	2	0	0	7	0	-2	4	0	0	1	-1
PF01992	vATP-synt_AC39	ATP synthase (C/AC39) subunit	1	0	23	24	0	1	2	0	19	21	0	0.56391	1.77333	1.77333	1.93689	0.36681	-0.78514	-0.263804	-0.521335		0	0	0	0	0	0	0	0	0	0	0	1	0	0	0	0	0	0	0	4	0	0	2	0	0	0	-1
PF01995	NRD1_2	NrpR regulatory domains NRD1 and 2	0	0	0	0	0	0	0	0	0	0	0	0	0	0	0	0	FALSE	FALSE	FALSE		0	0	0	0	0	0	0	0	0	0	0	0	0	0	0	0	0	0	0	0	0	0	0	0	0	0	0
PF01996	F420_ligase	F420-0:Gamma-glutamyl ligase	0	0	0	0	0	0	0	0	0	0	0	0	0	0	0	0	FALSE	FALSE	FALSE		0	0	0	0	0	0	0	0	0	0	0	0	0	0	0	0	0	0	0	0	0	0	0	0	0	0	0
PF01997	Translin	Translin family	3	3	30	36	1	4	3	1	26	32	0.408348	1.43541	2.44889	2.78667	0.933433	0.571323	-0.476289	0.347045	-0.823334		0	0	0	0	1	-1	0	0	-1	0	0	-1	0	0	0	0	1	1	0	0	-1	0	0	0	0	0	0
PF02002	TFIIE_alpha	TFIIE alpha subunit	1	2	24	43	2	2	3	2	19	38	1.07656	0.592105	1.85778	3.37778	0.0118013	0.611138	0.0392949	-0.362151	0.401445		0	0	0	0	0	0	0	0	0	0	0	0	0	0	-1	0	-1	0	1	0	0	0	0	0	0	0	0
PF02005	TRM	N2,N2-dimethylguanosine tRNA methyltransferase	1	5	41	47	3	6	5	3	28	41	1.07656	1.61483	2.78667	3.71556	0.017702	1.5173	0.0485873	0.661488	-0.6129		0	-1	-1	2	0	0	0	0	0	0	-1	0	0	-1	0	-1	0	0	0	0	-2	0	2	0	0	0	0
PF02007	MtrH	Tetrahydromethanopterin S-methyltransferase MtrH subunit	0	0	0	0	0	0	0	0	0	0	0	0	0	0	0	0	FALSE	FALSE	FALSE		0	0	0	0	0	0	0	0	0	0	0	0	0	0	0	0	0	0	0	0	0	0	0	0	0	0	0
PF02008	zf-CXXC	CXXC zinc finger domain	3	4	29	35	2	4	3	4	27	31	0.789474	1.35338	2.53333	2.95556	0.121934	0.399354	-0.138498	0.277841	-0.416338		0	-2	0	9	0	0	0	0	0	0	-1	0	-1	2	0	0	-1	3	0	0	0	0	0	0	0	0	0
PF02009	RIFIN	Rifin	0	0	0	0	0	0	0	0	0	0	0	0	0	0	0	0	FALSE	FALSE	FALSE		0	0	0	0	0	0	0	0	0	0	0	0	0	0	0	0	0	0	0	0	0	0	0	0	0	0	0
PF02010	REJ	REJ domain	5	6	84	31	11	1	5	2	68	32	1.78443	0.348297	6.16444	2.87111	4.09355	1.32838	1.36606	-0.603637	1.96969		6	0	6	-1	0	-1	5	-2	0	0	20	-5	7	-1	0	0	-1	0	0	0	0	0	8	1	3	0	0
PF02012	BNR	BNR/Asp-box repeat	0	0	55	54	2	6	5	4	43	41	0.493421	1.57895	4.05333	3.8	1.13194	1.37623	-0.54157	0.618443	-1.16001		0	0	0	0	0	0	0	0	0	0	0	0	0	0	0	0	0	0	0	0	-1	0	17	-3	-2	0	0
PF02013	CBM_10	Cellulose or protein binding domain	0	0	0	0	0	0	0	0	0	0	0	0	0	0	0	0	FALSE	FALSE	FALSE		0	0	0	0	0	0	0	0	0	0	0	0	0	0	0	0	0	0	0	0	0	0	0	0	0	0	0
PF02014	Reeler	Reeler domain	0	0	6	24	1	2	1	4	3	16	2.96053	1.18421	0.337778	1.68889	1.39237	0.0620753	0.623412	0.0951518	0.52826		0	0	0	0	0	0	0	0	0	0	0	0	0	0	0	0	0	0	0	0	0	0	-1	0	0	0	0
PF02015	Glyco_hydro_45	Glycosyl hydrolase family 45	2	4	12	40	0	5	1	3	12	34	0	1.60028	1.09778	3.12444	1.19903	1.21635	-0.563018	0.568512	-1.13153		1	-1	0	1	0	0	0	0	0	0	-1	0	-1	-1	0	0	0	0	0	-1	-2	3	10	0	0	0	0
PF02016	Peptidase_S66	LD-carboxypeptidase N-terminal domain	0	0	0	8	0	1	0	0	0	7	0	1.69173	0	0.591111	0	0.305407	FALSE	0.236188	FALSE		0	0	0	0	0	0	0	0	0	0	0	0	0	0	0	0	0	0	0	0	0	0	0	0	0	0	0
PF02017	CIDE-N	CIDE-N domain	0	0	1	3	0	0	0	1	1	2	0	0	0.0844444	0.253333	0.092233	0.276699	-0.118411	-0.222665	0.104254		0	0	0	0	0	0	0	0	0	0	0	0	0	0	0	0	0	0	0	0	0	0	0	0	0	0	0
PF02018	CBM_4_9	Carbohydrate binding domain	0	0	24	32	0	2	5	4	19	26	0	0.789474	2.02667	2.53333	2.21359	0.121934	-0.863915	-0.138498	-0.725417		0	0	0	0	0	0	0	0	0	0	0	0	0	0	0	0	0	0	0	0	0	0	0	0	0	0	0
PF02019	WIF	WIF domain	0	0	0	5	0	0	0	0	0	5	0	0	0	0.422222	0	0.461165	FALSE	-0.303574	FALSE		0	0	0	0	0	0	0	0	0	0	0	0	0	0	0	0	0	0	0	0	0	0	0	0	0	0	0
PF02020	W2	eIF4-gamma/eIF5/eIF2-epsilon	3	3	58	58	4	6	5	4	50	49	0.861244	1.34062	4.64444	4.47556	0.0970611	0.561872	-0.121831	0.343416	-0.465247		-1	0	0	1	0	0	0	0	0	0	-1	0	0	1	0	0	-1	1	0	1	-2	3	6	-3	0	0	2
PF02028	BCCT	BCCT, betaine/carnitine/choline family transporter	4	3	38	53	5	2	4	6	32	46	1.64474	0.455466	3.04	4.39111	1.36489	1.41729	0.614944	-0.631063	1.24601		0	0	-1	0	0	3	-1	0	0	0	0	2	0	1	0	-1	4	0	0	3	4	-1	1	-5	-2	0	0
PF02029	Caldesmon	Caldesmon	0	0	6	48	0	5	1	4	3	35	0	1.51822	0.337778	3.29333	0.368932	0.95598	-0.264731	0.483859	-0.74859		0	0	0	0	0	0	0	0	0	0	0	0	0	0	0	0	0	0	0	0	0	0	1	0	0	0	0
PF02033	RBFA	Ribosome-binding factor A	1	5	33	57	4	2	3	2	26	54	1.63339	0.422932	2.44889	4.72889	1.06122	1.71454	0.518646	-0.72034	1.23899		0	-2	-1	0	0	0	-1	0	-1	1	0	0	0	0	0	0	-1	0	0	-1	-1	-1	0	0	0	0	0
PF02036	SCP2	SCP-2 sterol transfer family	4	1	34	60	1	5	3	3	30	52	0.358852	1.07656	2.78667	4.64444	1.24779	0.0295033	-0.578437	0.0636763	-0.642113		0	0	0	3	0	0	0	0	0	2	1	0	0	0	0	0	1	0	-1	1	-2	-1	3	0	0	0	-1
PF02037	SAP	SAP domain	8	8	70	148	4	14	10	9	61	126	0.667161	1.22807	5.99556	11.4	0.721909	0.64211	-0.402833	0.373713	-0.776547		-10	0	-3	11	3	4	1	3	-1	0	-8	-9	-12	10	-5	0	15	16	-9	4	-9	0	-1	-6	-1	0	2
PF02040	ArsB	Arsenical pump membrane protein	0	6	20	46	0	5	1	3	19	42	0	1.31579	1.68889	3.8	1.84466	0.410116	-0.758439	0.282404	-1.04084		0	-1	-1	0	0	0	0	0	0	0	-1	0	-1	0	0	0	-1	-1	0	0	-1	1	0	0	0	0	0
PF02041	Auxin_BP	Auxin binding protein	0	0	0	0	0	0	0	0	0	0	0	0	0	0	0	0	FALSE	FALSE	FALSE		0	0	0	0	0	0	0	0	0	0	0	0	0	0	0	0	0	0	0	0	0	0	0	0	0	0	0
PF02042	RWP-RK	RWP-RK domain	2	5	22	38	3	2	3	3	16	35	1.86981	0.623269	1.60444	3.20889	1.30935	0.495148	0.597718	-0.317278	0.914996		0	0	-34	0	0	161	-1	-1	0	0	0	-4	1	0	0	0	-1	0	0	0	0	0	0	0	0	0	0
PF02044	Bombesin	Bombesin-like peptide	0	0	0	0	0	0	0	0	0	0	0	0	0	0	0	0	FALSE	FALSE	FALSE		0	0	0	0	0	0	0	0	0	0	0	0	0	0	0	0	0	0	0	0	0	0	0	0	0	0	0
PF02045	CBFB_NFYA	CCAAT-binding transcription factor (CBF-B/NF-YA) subunit B	2	4	12	31	2	4	3	1	9	29	1.97368	1.57895	1.01333	2.53333	1.03566	0.917484	0.510278	0.470908	0.0393695		-1	1	0	-1	1	0	0	0	0	0	-1	0	0	0	0	0	-1	0	0	0	0	0	0	0	0	0	0
PF02046	COX6A	Cytochrome c oxidase subunit VIa	2	6	11	54	2	5	2	2	8	51	2.36842	1.11718	0.844444	4.47556	1.70099	0.0665929	0.716339	0.0988885	0.61745		0	0	-1	1	1	0	-1	0	0	0	-1	-1	-1	0	0	0	-1	0	0	0	0	0	0	0	0	0	0
PF02049	FliE	Flagellar hook-basal body complex protein FliE	0	0	1	10	0	2	0	3	1	5	0	2.96053	0.0844444	0.675556	0.092233	2.78473	-0.118411	1.02152	-1.13993		0	0	0	0	0	0	0	0	0	0	0	0	0	0	0	0	0	0	0	0	0	0	0	0	0	0	0
PF02050	FliJ	Flagellar FliJ protein	0	0	0	0	0	0	0	0	0	0	0	0	0	0	0	0	FALSE	FALSE	FALSE		0	0	0	0	0	0	0	0	0	0	0	0	0	0	0	0	0	0	0	0	0	0	0	0	0	0	0
PF02055	Glyco_hydro_30	Glycosyl hydrolase family 30 TIM-barrel domain	2	1	45	46	2	5	4	1	37	40	0.577664	1.44416	3.46222	3.46222	0.671627	0.73861	-0.384592	0.408817	-0.793409		0	0	0	1	0	0	0	0	0	0	0	0	-2	0	0	0	2	0	0	9	-11	1	9	-16	0	2	0
PF02057	Glyco_hydro_59	Glycosyl hydrolase family 59	1	2	10	19	0	3	0	1	9	14	0	2.36842	0.76	1.26667	0.830097	2.55148	-0.440998	0.957853	-1.39885		0	0	0	-1	0	0	0	0	0	0	0	0	-1	0	0	0	1	0	0	0	-1	0	0	0	0	0	0
PF02065	Melibiase	Melibiase	4	4	47	54	3	8	3	5	41	43	0.807416	1.97368	3.71556	4.05333	0.149634	4.14266	-0.155594	1.37866	-1.53426		0	0	-1	2	0	2	0	0	0	-1	1	0	-2	0	-1	0	2	0	0	-1	-1	3	1	0	1	0	1
PF02070	NMU	Neuromedin U	0	0	0	0	0	0	0	0	0	0	0	0	0	0	0	0	FALSE	FALSE	FALSE		0	0	0	0	0	0	0	0	0	0	0	0	0	0	0	0	0	0	0	0	0	0	0	0	0	0	0
PF02071	NSF	Aromatic-di-Alanine (AdAR) repeat	0	0	0	0	0	0	0	0	0	0	0	0	0	0	0	0	FALSE	FALSE	FALSE		0	0	0	0	0	0	0	0	0	0	0	0	0	0	0	0	0	0	0	0	0	0	0	0	0	0	0
PF02074	Peptidase_M32	Carboxypeptidase Taq (M32) metallopeptidase	4	4	44	34	6	1	5	1	37	33	1.69173	0.348297	3.54667	2.87111	1.83244	1.32838	0.754883	-0.603637	1.35852		0	-1	2	0	1	-1	0	0	0	1	2	0	0	0	0	-1	-1	0	0	0	1	-1	0	1	0	0	0
PF02075	RuvC	Crossover junction endodeoxyribonuclease RuvC	0	0	3	18	0	1	0	4	3	13	0	0.696594	0.253333	1.43556	0.276699	0.143603	-0.222665	-0.15198	-0.0706852		0	0	0	0	0	0	0	0	0	0	0	0	0	0	0	0	0	0	0	0	0	0	0	0	0	0	0
PF02077	SURF4	SURF4 family	2	7	14	42	1	5	2	1	13	42	0.789474	1.37699	1.26667	3.63111	0.0609669	0.55829	-0.094218	0.342036	-0.436254		-1	0	0	4	0	0	0	0	0	0	-1	0	-1	0	-1	-1	-1	2	-1	0	0	0	0	0	0	0	0
PF02078	Synapsin	Synapsin, N-terminal domain	0	0	1	19	0	2	0	2	1	14	0	1.48026	0.0844444	1.35111	0.092233	0.336928	-0.118411	0.250567	-0.368978		0	0	0	0	0	0	0	0	0	0	0	0	0	0	0	0	0	0	0	0	0	0	0	-1	0	0	0
PF02080	TrkA_C	TrkA-C domain	2	2	49	50	1	5	4	7	44	35	0.246711	1.40977	4.05333	3.54667	2.50746	0.644147	-0.945739	0.374468	-1.32021		0	0	0	0	0	0	0	0	0	0	-1	0	0	0	1	0	-1	0	1	0	0	-1	-1	-1	1	0	0
PF02082	Rrf2	Iron-dependent Transcriptional regulator	0	5	3	27	0	4	0	6	3	22	0	1.69173	0.253333	2.36444	0.276699	1.22163	-0.222665	0.57018	-0.792846		0	0	-1	0	-1	0	0	0	0	0	-1	0	0	0	-1	0	-1	0	0	0	0	0	0	0	0	0	0
PF02086	MethyltransfD12	D12 class N6 adenine-specific DNA methyltransferase	0	2	1	14	0	2	0	1	0	11	0	1.97368	0	1.01333	0	1.03566	0	0.510278	-0.510278		-1	0	0	0	0	-1	0	0	0	0	0	0	0	0	0	0	0	0	0	0	0	0	0	0	0	0	0
PF02089	Palm_thioest	Palmitoyl protein thioesterase	4	2	28	50	1	4	3	5	25	40	0.422932	1.05263	2.36444	3.8	0.857272	0.0114113	-0.45038	0.0386126	-0.488993		1	0	0	4	2	0	0	0	0	0	0	-1	0	-1	0	0	1	0	0	0	0	-1	0	0	0	0	0
PF02090	SPAM	Salmonella surface presentation of antigen gene type M protein	0	0	0	0	0	0	0	0	0	0	0	0	0	0	0	0	FALSE	FALSE	FALSE		0	0	0	0	0	0	0	0	0	0	0	0	0	0	0	0	0	0	0	0	0	0	0	0	0	0	0
PF02091	tRNA-synt_2e	Glycyl-tRNA synthetase alpha subunit	0	1	5	23	0	2	1	5	4	16	0	1.12782	0.422222	1.77333	0.461165	0.0313929	-0.303574	0.0658215	-0.369395		0	0	0	0	0	0	0	0	0	0	0	0	0	0	0	0	-1	0	0	0	0	0	0	0	0	0	0
PF02092	tRNA_synt_2f	Glycyl-tRNA synthetase beta subunit	0	0	10	20	0	2	1	4	9	13	0	1.39319	0.844444	1.43556	0.92233	0.240072	-0.472546	0.204708	-0.677254		0	0	0	0	0	0	0	0	0	0	0	0	0	0	0	0	0	0	0	0	0	0	0	0	0	0	0
PF02096	60KD_IMP	60Kd inner membrane protein	3	4	55	61	5	6	6	4	46	50	1.13866	1.31579	4.39111	4.56	0.0914782	0.492139	0.11787	0.316076	-0.198205		-1	0	-1	0	0	1	0	0	-1	0	0	1	2	0	0	0	0	-1	0	0	-5	7	4	-4	0	1	0
PF02099	Josephin	Josephin	3	4	45	45	3	5	6	3	35	37	0.866496	1.48026	3.46222	3.37778	0.0669791	0.84232	-0.0992031	0.445227	-0.54443		-1	0	0	2	1	0	0	0	-1	0	-1	0	0	0	0	-1	7	0	0	0	-3	1	2	-1	-1	0	0
PF02100	ODC_AZ	Ornithine decarboxylase antizyme	0	0	1	14	0	0	0	0	1	13	0	0	0.0844444	1.09778	0.092233	1.19903	-0.118411	-0.563018	0.444606		0	0	0	0	0	0	0	0	0	0	0	0	0	0	0	0	0	0	0	0	-1	-1	0	0	0	0	0
PF02101	Ocular_alb	Ocular albinism type 1 protein	0	0	0	0	0	0	0	0	0	0	0	0	0	0	0	0	FALSE	FALSE	FALSE		0	0	0	0	0	0	0	0	0	0	0	0	0	0	0	0	0	0	0	0	0	0	0	0	0	0	0
PF02104	SURF1	SURF1 family	2	4	22	50	0	6	4	0	20	46	0	1.54462	2.02667	3.88444	2.21359	1.2452	-0.863915	0.57762	-1.44153		-1	0	-1	0	1	0	0	0	0	0	-1	0	0	0	-1	0	0	1	0	0	0	0	0	0	0	-1	0
PF02109	DAD	DAD family	0	0	0	23	0	1	0	2	0	20	0	0.538278	0	1.85778	0	0.430857	FALSE	-0.291096	FALSE		0	0	0	0	0	0	0	0	0	0	0	0	0	0	0	0	0	0	0	0	0	0	0	0	0	0	0
PF02110	HK	Hydroxyethylthiazole kinase family	1	2	6	13	0	2	0	1	6	10	0	2.15311	0.506667	0.928889	0.553398	1.33015	-0.340148	0.604188	-0.944336		0	0	-1	0	0	2	0	-1	0	0	0	0	0	0	0	0	0	0	0	0	0	0	0	0	0	0	0
PF02113	Peptidase_S13	D-Ala-D-Ala carboxypeptidase 3 (S13) family	0	0	1	18	0	2	0	4	1	11	0	1.57895	0.0844444	1.26667	0.092233	0.458742	-0.118411	0.302585	-0.420997		0	0	0	0	0	0	0	0	0	0	0	0	0	0	0	0	0	0	0	0	0	0	0	0	0	0	0
PF02114	Phosducin	Phosducin	4	4	41	58	5	4	4	4	32	48	1.64474	0.910931	3.04	4.39111	1.36489	0.0377998	0.614944	-0.0727088	0.687652		0	-1	0	0	0	-1	0	0	0	1	1	1	0	1	0	-2	-2	0	0	0	0	-1	2	-1	0	0	0
PF02115	Rho_GDI	RHO protein GDP dissociation inhibitor	0	4	7	22	1	5	0	2	5	18	2.36842	2.96053	0.422222	1.68889	0.850493	6.96183	0.448046	2.07953	-1.63148		0	-1	-1	0	0	0	0	0	0	0	0	0	-1	0	0	0	-1	0	0	0	0	0	0	0	0	-1	0
PF02118	Srg	Srg family chemoreceptor	0	0	0	0	0	0	0	0	0	0	0	0	0	0	0	0	FALSE	FALSE	FALSE		0	0	0	0	0	0	0	0	0	0	0	0	0	0	0	0	0	0	0	0	0	0	0	0	0	0	0
PF02119	FlgI	Flagellar P-ring protein	0	0	0	0	0	0	0	0	0	0	0	0	0	0	0	0	FALSE	FALSE	FALSE		0	0	0	0	0	0	0	0	0	0	0	0	0	0	0	0	0	0	0	0	0	0	0	0	0	0	0
PF02120	Flg_hook	Flagellar hook-length control protein FliK	0	0	0	7	0	0	0	1	0	6	0	0	0	0.591111	0	0.645631	FALSE	-0.375018	FALSE		0	0	0	0	0	0	0	0	0	0	0	0	0	0	0	0	0	0	0	0	0	0	0	0	0	0	0
PF02121	IP_trans	Phosphatidylinositol transfer protein	0	0	4	10	1	0	0	1	3	8	3.94737	0	0.253333	0.76	2.3495	0.830097	0.90197	-0.440998	1.34297		0	0	0	0	0	0	0	0	0	0	0	0	0	0	0	0	0	0	0	0	0	0	0	0	0	0	0
PF02122	Peptidase_S39	Peptidase S39	0	0	0	0	0	0	0	0	0	0	0	0	0	0	0	0	FALSE	FALSE	FALSE		0	0	0	0	0	0	0	0	0	0	0	0	0	0	0	0	0	0	0	0	0	0	0	0	0	0	0
PF02123	RdRP_4	Viral RNA-directed RNA-polymerase	0	0	1	8	0	1	0	1	1	6	0	1.69173	0.0844444	0.591111	0.092233	0.305407	-0.118411	0.236188	-0.3546		0	0	0	0	0	0	0	0	0	0	0	0	0	0	0	0	0	0	0	0	0	0	0	0	0	0	0
PF02126	PTE	Phosphotriesterase family	0	3	5	25	0	5	0	3	5	20	0	2.57437	0.422222	1.94222	0.461165	5.17289	-0.303574	1.63937	-1.94294		0	0	-1	0	0	0	0	0	0	0	-1	0	0	0	0	0	-1	0	0	0	1	-1	0	-1	0	0	0
PF02127	Peptidase_M18	Aminopeptidase I zinc metalloprotease (M18)	3	3	41	38	2	1	7	1	34	35	0.577664	0.328947	3.46222	3.04	0.671627	1.49149	-0.384592	-0.653676	0.269084		0	2	0	0	0	0	1	0	0	0	1	0	0	-1	0	0	-2	-1	0	1	0	-1	2	-1	0	0	0
PF02128	Peptidase_M36	Fungalysin metallopeptidase (M36)	0	0	2	20	0	2	0	1	0	16	0	1.39319	0	1.43556	0	0.240072	0	0.204708	-0.204708		0	0	0	0	0	0	0	0	0	0	0	0	0	0	0	0	0	0	0	0	0	0	0	0	0	0	0
PF02129	Peptidase_S15	X-Pro dipeptidyl-peptidase (S15 family)	7	6	163	19	12	2	13	2	136	20	0.953727	1.07656	12.5822	1.85778	0.0292254	0.0118013	-0.0633557	0.0392949	-0.102651		0	-1	0	8	0	1	0	1	2	-1	-2	-2	-3	2	0	2	1	0	-1	3	5	10	11	1	6	4	5
PF02130	UPF0054	Uncharacterized protein family UPF0054	2	2	24	40	2	1	2	4	20	35	1.07656	0.303644	1.85778	3.29333	0.0118013	1.74026	0.0392949	-0.727912	0.767207		0	-1	0	0	0	2	0	0	0	0	1	0	0	0	0	0	-1	0	0	0	0	0	0	0	0	0	0
PF02133	Transp_cyt_pur	Permease for cytosine/purines, uracil, thiamine, allantoin	2	1	16	25	0	6	2	1	16	17	0	3.94737	1.52	1.52	1.66019	14.097	-0.704263	3.7604	-4.46467		0	0	0	0	0	0	0	1	0	0	-1	0	0	0	0	0	1	0	0	0	-1	-1	2	-1	0	0	0
PF02134	0	0	0	0	58	53	3	3	5	2	47	46	0.683198	0.740132	4.39111	4.05333	0.478944	0.297362	-0.310779	-0.232442	-0.0783367		0	0	0	0	0	0	0	0	0	0	0	0	0	0	0	0	0	0	0	3	-2	1	9	-3	0	1	0
PF02135	zf-TAZ	TAZ zinc finger	5	7	41	58	4	5	4	7	37	51	1.15533	1.02087	3.46222	4.89778	0.090494	0.00231334	0.117163	0.016988	0.100174		-2	0	0	-1	0	0	0	1	0	-1	3	0	-1	3	-1	1	-4	-1	2	0	0	0	0	0	0	-1	0
PF02136	NTF2	Nuclear transport factor 2 (NTF2) domain	4	3	38	41	3	4	4	4	34	34	0.934903	1.24654	3.20889	3.20889	0.0147527	0.211172	-0.0441553	0.189868	-0.234024		0	-1	0	2	1	1	0	0	0	0	1	-1	0	0	0	0	-1	0	0	1	0	0	2	0	0	0	0
PF02137	A_deamin	Adenosine-deaminase (editase) domain	1	4	34	66	4	5	5	4	24	58	1.63339	0.955008	2.44889	5.23556	1.06122	0.0114964	0.518646	-0.0387623	0.557408		0	-2	0	0	0	-1	0	0	0	0	0	0	0	1	0	0	-1	0	-1	0	-1	1	0	0	0	0	0
PF02138	Beach	Beige/BEACH domain	5	6	62	71	7	5	5	6	53	60	1.42922	0.897129	4.89778	5.57333	0.975845	0.0640034	0.490493	-0.0967598	0.587253		0	4	-1	-1	0	1	0	-1	1	0	5	-1	-1	0	0	0	-3	0	1	1	0	0	2	-1	0	1	0
PF02140	Gal_Lectin	Galactose binding lectin domain	2	6	18	28	0	4	2	2	18	26	0	1.69173	1.68889	2.36444	1.84466	1.22163	-0.758439	0.57018	-1.32862		0	1	0	0	0	0	-1	0	0	0	-1	1	-1	0	-1	-1	-1	0	0	-1	0	2	0	0	0	0	0
PF02141	DENN	DENN (AEX-3) domain	7	7	65	72	6	5	11	7	52	63	1.12782	0.845865	5.32	5.91111	0.0941786	0.15245	0.119798	-0.157263	0.277061		-2	0	-1	0	3	1	0	0	1	-1	3	1	0	2	-3	-1	-3	-1	2	0	-1	1	4	-1	0	2	0
PF02142	MGS	MGS-like domain	3	2	44	48	2	6	3	2	40	38	0.550796	1.77632	3.63111	3.37778	0.797014	2.197	-0.429472	0.859241	-1.28871		0	0	-1	3	0	0	1	0	0	0	0	0	-1	0	0	0	0	1	0	5	0	-1	3	-6	-1	0	0
PF02144	Rad1	Repair protein Rad1/Rec1/Rad17	0	6	42	56	3	4	3	5	35	48	0.934903	0.893744	3.20889	4.47556	0.0147527	0.0548364	-0.0441553	-0.0889214	0.0447661		0	0	0	0	-1	0	0	0	-1	0	-1	-2	0	0	0	0	-1	-2	0	0	-1	0	0	0	0	-1	1
PF02145	Rap_GAP	Rap/ran-GAP	0	3	11	25	0	3	0	4	10	20	0	1.48026	0.844444	2.02667	0.92233	0.505392	-0.472546	0.321354	-0.793899		0	0	-1	0	0	0	0	0	0	0	-1	0	0	0	0	0	-1	0	0	0	0	0	0	0	0	0	0
PF02146	SIR2	Sir2 family	6	8	173	28	11	4	17	4	143	26	0.814145	1.57895	13.5111	2.53333	0.506742	0.917484	-0.321889	0.470908	-0.792797		-3	-3	-2	9	2	1	0	0	0	0	-3	-3	-2	2	-1	0	13	1	-1	14	10	29	45	6	14	8	9
PF02148	zf-UBP	Zn-finger in ubiquitin-hydrolases and other protein	6	2	63	72	7	3	7	6	50	61	1.45429	0.530244	4.81333	5.65778	1.07418	1.35829	0.522873	-0.612907	1.13578		1	0	0	3	0	1	0	0	0	0	1	1	-1	0	0	2	-1	0	0	0	-1	1	2	-2	0	0	2
PF02149	KA1	Kinase associated domain 1	1	0	20	29	2	0	1	2	16	25	1.39319	0	1.43556	2.28	0.240072	2.49029	0.204708	-0.941003	1.14571		0	0	0	0	0	0	0	0	0	0	1	0	0	0	0	0	0	0	0	0	-1	1	1	0	0	0	0
PF02150	RNA_POL_M_15KD	RNA polymerases M/15 Kd subunit	1	5	7	63	1	5	1	3	6	54	1.69173	1.03878	0.591111	4.81333	0.305407	0.00784846	0.236188	0.0317943	0.204394		0	0	-1	0	0	0	-1	0	0	1	0	0	-1	0	0	0	-1	-1	0	0	0	0	0	0	0	0	0
PF02151	UVR	UvrB/uvrC motif	3	5	50	70	3	7	4	8	44	54	0.740132	1.33701	4.05333	5.23556	0.297362	0.643463	-0.232442	0.374215	-0.606657		0	0	-1	0	0	2	0	0	0	0	-1	-1	-2	0	0	0	4	2	-1	2	-2	7	-1	-5	2	0	0
PF02152	FolB	Dihydroneopterin aldolase	0	0	4	42	1	4	0	5	3	33	3.94737	1.24654	0.253333	3.20889	2.3495	0.211172	0.90197	0.189868	0.712101		0	0	0	0	0	0	0	0	0	0	0	0	0	0	0	0	0	0	0	0	0	0	0	0	0	-1	2
PF02153	PDH	Prephenate dehydrogenase	1	5	28	49	2	5	3	4	24	42	0.877193	1.28719	2.28	3.88444	0.0373201	0.346784	-0.0722116	0.254973	-0.327184		0	-1	-1	0	1	0	0	0	0	0	0	0	-1	0	-1	0	-1	0	0	0	0	0	4	0	0	0	0
PF02154	FliM	Flagellar motor switch protein FliM	0	0	0	0	0	0	0	0	0	0	0	0	0	0	0	0	FALSE	FALSE	FALSE		0	0	0	0	0	0	0	0	0	0	0	0	0	0	0	0	0	0	0	0	0	0	0	0	0	0	0
PF02156	Glyco_hydro_26	Glycosyl hydrolase family 26	0	1	8	33	0	3	0	0	8	29	0	1.22505	0.675556	2.44889	0.737864	0.134303	-0.40855	0.146295	-0.554845		0	0	0	0	0	0	0	0	0	0	0	0	0	0	0	0	-1	0	0	0	0	0	0	0	0	0	0
PF02157	Man-6-P_recep	Mannose-6-phosphate receptor	1	2	9	13	0	1	1	0	7	14	0	0.845865	0.675556	1.18222	0.737864	0.0304899	-0.40855	-0.0648036	-0.343747		0	2	0	-1	0	0	0	0	0	0	0	0	-1	0	0	0	0	0	0	0	0	0	1	-1	0	0	0
PF02162	XYPPX	XYPPX repeat (two copies)	0	0	0	0	0	0	0	0	0	0	0	0	0	0	0	0	FALSE	FALSE	FALSE		0	0	0	0	0	0	0	0	0	0	0	0	0	0	0	0	0	0	0	0	0	0	0	0	0	0	0
PF02163	Peptidase_M50	Peptidase family M50	3	0	60	53	7	2	5	3	49	44	1.53509	0.503919	4.56	3.96889	1.4111	1.06281	0.629165	-0.519168	1.14833		0	0	1	0	0	0	0	0	0	1	3	0	0	0	0	0	0	0	0	0	-2	1	3	0	1	0	-1
PF02167	Cytochrom_C1	Cytochrome C1 family	2	0	29	30	0	2	1	0	28	25	0	0.947368	2.44889	2.11111	2.67476	0.00634398	-0.991609	-0.0284847	-0.963124		0	0	0	1	0	0	0	0	0	0	0	0	0	0	0	0	2	0	0	0	-1	5	5	-1	-2	0	0
PF02170	PAZ	PAZ domain	1	4	40	42	2	6	5	2	33	36	0.623269	1.86981	3.20889	3.20889	0.495148	2.61871	-0.317278	0.976293	-1.29357		0	0	0	0	0	0	-1	0	0	0	0	-1	-1	0	-1	0	3	0	0	0	-1	0	0	-2	0	1	0
PF02171	Piwi	Piwi domain	4	3	45	42	4	6	7	1	37	35	1.07656	1.97368	3.71556	3.04	0.0236027	3.10699	0.0565548	1.10815	-1.05159		0	0	0	4	0	0	-1	0	0	0	4	-1	-1	0	0	0	2	1	0	1	0	0	1	-1	0	0	0
PF02174	IRS	PTB domain (IRS-1 type)	0	0	0	0	0	0	0	0	0	0	0	0	0	0	0	0	FALSE	FALSE	FALSE		0	0	0	0	0	0	0	0	0	0	0	0	0	0	0	0	0	0	0	0	0	0	0	0	0	0	0
PF02176	zf-TRAF	TRAF-type zinc finger	4	7	53	78	9	4	2	7	42	70	2.42225	0.615174	3.71556	6.50222	8.08241	1.04696	2.34972	-0.513984	2.86371		-1	-2	28	2	0	-10	0	-1	-1	0	2	-1	0	1	-1	0	0	0	0	0	-1	1	2	-1	0	-1	0
PF02177	APP_N	Amyloid A4 N-terminal heparin-binding	0	0	0	0	0	0	0	0	0	0	0	0	0	0	0	0	FALSE	FALSE	FALSE		0	0	0	0	0	0	0	0	0	0	0	0	0	0	0	0	0	0	0	0	0	0	0	0	0	0	0
PF02178	AT_hook	AT hook motif	0	6	4	27	1	2	0	3	3	28	3.94737	0.764007	0.253333	2.61778	2.3495	0.158353	0.90197	-0.160725	1.06269		0	0	0	0	0	-1	0	0	0	0	-1	-1	0	0	-1	-1	-1	0	0	0	0	0	0	0	0	0	0
PF02179	BAG	BAG domain	2	5	20	41	2	5	3	2	15	37	1.31579	1.51822	1.52	3.29333	0.164046	0.95598	0.164019	0.483859	-0.31984		0	0	-1	0	2	1	0	0	0	0	-1	-1	0	0	-1	0	-1	0	0	3	0	0	-1	-1	0	-1	0
PF02181	FH2	Formin Homology 2 Domain	9	6	166	29	12	2	14	4	140	27	0.922761	0.764007	13.0044	2.61778	0.0841762	0.158353	-0.112543	-0.160725	0.0481821		5	-3	-2	4	0	2	1	0	-1	0	1	-1	2	-3	1	0	13	1	-1	21	3	39	42	6	24	4	6
PF02182	SAD_SRA	SAD/SRA domain	3	5	25	48	1	4	3	4	24	44	0.438596	0.986842	2.28	4.05333	0.782298	0.00076108	-0.424305	-0.00966513	-0.41464		0	0	0	3	1	0	1	-1	0	0	-1	-1	-1	0	0	0	-1	0	0	0	0	0	0	0	0	1	-1
PF02183	HALZ	Homeobox associated leucine zipper	0	0	15	57	1	3	0	6	12	44	0.986842	0.710526	1.01333	4.22222	0.00019027	0.384426	-0.00480614	-0.271448	0.266642		0	0	0	0	0	0	0	0	0	0	0	0	0	0	0	0	0	0	0	0	-1	-1	1	-1	0	0	0
PF02184	HAT	HAT (Half-A-TPR) repeat	1	2	21	24	1	2	0	1	21	20	0.56391	1.12782	1.77333	1.77333	0.36681	0.0313929	-0.263804	0.0658215	-0.329626		0	0	0	1	0	0	0	0	0	0	0	0	-1	0	0	0	-1	0	0	1	0	0	1	-1	0	-1	0
PF02186	TFIIE_beta	TFIIE beta subunit core domain	0	0	0	0	0	0	0	0	0	0	0	0	0	0	0	0	FALSE	FALSE	FALSE		0	0	0	0	0	0	0	0	0	0	0	0	0	0	0	0	0	0	0	0	0	0	0	0	0	0	0
PF02187	GAS2	Growth-Arrest-Specific Protein 2 Domain	0	0	1	14	0	2	0	0	1	11	0	2.15311	0.0844444	0.928889	0.092233	1.33015	-0.118411	0.604188	-0.722599		0	0	0	0	0	0	0	0	0	0	0	0	0	0	0	0	0	0	0	0	0	0	0	0	0	0	0
PF02190	LON_substr_bdg	ATP-dependent protease La (LON) substrate-binding domain	9	3	165	28	14	2	16	3	138	24	1.07656	0.877193	13.0044	2.28	0.0826094	0.0373201	0.111376	-0.0722116	0.183587		-2	0	-2	-2	3	1	0	2	0	1	2	0	2	2	0	0	2	1	0	3	3	13	18	2	8	3	7
PF02194	PXA	PXA domain	1	5	13	46	0	7	1	7	12	35	0	1.97368	1.09778	3.54667	1.19903	3.62482	-0.563018	1.24471	-1.80773		1	0	-1	0	-1	0	0	0	0	0	-1	0	0	0	-1	0	-1	0	0	0	0	0	0	0	0	-1	0
PF02195	ParBc	ParB-like nuclease domain	0	6	6	39	0	6	1	3	5	35	0	1.86981	0.506667	3.20889	0.553398	2.61871	-0.340148	0.976293	-1.31644		-1	0	-1	0	0	0	0	-1	0	0	-1	-1	0	0	-1	0	0	0	0	0	-1	0	0	-1	0	0	0
PF02196	RBD	Raf-like Ras-binding domain	0	0	0	10	0	2	0	1	0	6	0	3.38346	0	0.591111	0	3.59408	FALSE	1.23668	FALSE		0	0	0	0	0	0	0	0	0	0	0	0	0	0	0	0	0	0	0	0	0	0	0	0	0	-1	0
PF02197	RIIa	Regulatory subunit of type II PKA R-subunit	3	3	25	38	5	2	0	2	21	33	2.81955	0.676692	1.77333	2.95556	6.30083	0.335759	1.91836	-0.250042	2.1684		0	0	0	-2	0	1	0	0	0	-1	0	-2	1	1	0	0	0	0	0	0	-1	1	1	0	1	0	0
PF02198	SAM_PNT	Sterile alpha motif (SAM)/Pointed domain	0	0	17	43	0	4	1	4	15	31	0	1.35338	1.35111	2.95556	1.47573	0.399354	-0.648892	0.277841	-0.926733		0	0	0	0	0	0	0	0	0	0	0	0	0	0	0	0	0	0	0	2	0	0	3	-1	0	0	0
PF02201	SWIB	SWIB/MDM2 domain	3	3	39	40	4	6	2	3	33	30	1.35338	2.15311	2.95556	2.78667	0.399354	3.99046	0.277841	1.33953	-1.06169		1	-1	0	0	0	0	0	0	0	1	0	0	1	-1	0	0	-1	0	0	0	-1	0	2	0	0	0	2
PF02203	TarH	Tar ligand binding domain homologue	0	0	0	0	0	0	0	0	0	0	0	0	0	0	0	0	FALSE	FALSE	FALSE		0	0	0	0	0	0	0	0	0	0	0	0	0	0	0	0	0	0	0	0	0	0	0	0	0	0	0
PF02204	VPS9	Vacuolar sorting protein 9 (VPS9) domain	4	7	53	54	4	7	4	4	46	47	0.947368	1.62539	4.22222	4.30667	0.012688	1.81948	-0.0408082	0.751106	-0.791914		-1	3	-1	-1	1	3	-1	0	0	0	-1	0	-1	3	0	0	0	-1	0	0	-4	2	1	-2	1	0	1
PF02205	WH2	WH2 motif	0	0	25	45	0	5	2	4	20	36	0	1.48026	1.85778	3.37778	2.02913	0.84232	-0.811608	0.445227	-1.25684		0	0	0	0	0	0	0	0	0	0	0	0	0	0	0	0	0	0	0	0	0	0	0	0	0	0	0
PF02207	zf-UBR	Putative zinc finger in N-recognin (UBR box)	3	6	35	69	7	2	6	6	22	64	2.96053	0.338346	2.36444	5.91111	9.74656	2.81926	2.74555	-1.03087	3.77642		-1	-1	1	0	0	0	0	-1	0	0	0	-1	0	1	1	0	-1	-1	0	0	-1	0	1	0	0	0	0
PF02209	VHP	Villin headpiece domain	5	4	41	47	3	4	4	3	36	40	0.888158	1.10159	3.37778	3.63111	0.0458534	0.0406136	-0.0806904	0.075573	-0.156263		-2	2	0	0	1	0	0	0	0	-1	3	-1	-1	2	0	0	2	0	0	0	-1	1	1	-2	0	0	2
PF02210	Laminin_G_2	Laminin G domain	1	2	25	44	0	4	3	4	22	35	0	1.21457	2.11111	3.29333	2.30583	0.16421	-0.889781	0.164113	-1.05389		0	0	-1	0	0	0	0	0	0	0	0	0	-1	0	0	0	1	0	0	0	-1	0	0	0	0	0	0
PF02211	NHase_beta	Nitrile hydratase beta subunit	1	5	9	66	1	4	2	5	6	58	1.48026	0.75188	0.675556	5.32	0.168464	0.355768	0.166546	-0.258954	0.4255		-1	-1	0	1	-1	0	0	0	0	0	0	0	-1	0	-1	0	0	0	0	0	-1	0	0	-1	-1	0	0
PF02212	GED	Dynamin GTPase effector domain	3	3	45	47	4	5	4	2	38	38	1.12782	1.48026	3.54667	3.37778	0.0627857	0.84232	0.0957466	0.445227	-0.349481		0	1	1	-1	0	-1	0	0	0	0	0	-1	0	0	0	0	2	0	0	3	-3	1	3	-3	0	-1	0
PF02213	GYF	GYF domain	5	5	164	21	12	4	16	1	132	19	0.960171	2.36842	12.4978	1.68889	0.021506	3.40197	-0.0538382	1.1863	-1.24013		-1	0	-1	2	1	0	-1	0	0	0	0	0	-1	2	0	0	4	2	-1	12	4	13	18	1	9	3	3
PF02214	BTB_2	BTB/POZ domain	7	9	152	23	12	1	16	2	123	28	1.02234	0.394737	11.7378	2.53333	0.0063518	1.01066	0.0285027	-0.502042	0.530545		-7	-4	6	6	14	-2	0	-2	0	0	41	-2	-1	9	-8	-4	2	11	-6	21	9	19	22	4	39	1	6
PF02219	MTHFR	Methylenetetrahydrofolate reductase	1	3	47	47	3	3	2	2	41	40	0.826193	0.845865	3.63111	3.54667	0.119092	0.0914698	-0.136664	-0.117864	-0.0188		-1	0	0	0	0	0	-1	0	0	0	0	0	-1	0	0	0	1	0	0	0	0	3	0	-1	0	1	0
PF02221	E1_DerP2_DerF2	ML domain	1	3	17	33	0	3	1	3	16	28	0	1.14601	1.43556	2.61778	1.56796	0.0604636	-0.676741	0.0937918	-0.770533		0	-1	0	0	0	0	0	0	0	1	-1	0	0	0	0	0	-1	0	0	0	0	0	7	-1	0	0	0
PF02222	ATP-grasp	ATP-grasp domain	5	3	42	51	1	7	3	1	41	40	0.269139	2.02182	3.71556	3.46222	2.16331	3.896	-0.849736	1.31514	-2.16488		0	3	-2	0	0	2	0	0	0	0	0	2	-1	0	1	0	-2	0	1	0	-3	3	3	-2	-1	0	0
PF02223	Thymidylate_kin	Thymidylate kinase	4	1	45	48	4	3	7	4	35	38	1.12782	0.845865	3.54667	3.54667	0.0627857	0.0914698	0.0957466	-0.117864	0.213611		1	0	0	0	0	1	0	1	0	0	1	0	-1	0	0	0	0	0	0	0	0	0	2	-1	1	0	-1
PF02224	Cytidylate_kin	Cytidylate kinase	1	1	5	24	2	2	1	5	2	18	7.89474	1.02975	0.253333	1.94222	12.6855	0.00186357	3.43357	0.0152177	3.41835		0	0	1	0	0	0	0	0	0	0	0	0	0	0	0	0	0	0	-1	0	0	0	0	0	0	0	0
PF02225	PA	PA domain	7	7	169	31	13	3	17	3	137	30	0.999658	1.07656	13.0044	2.78667	1.64722e-06	0.017702	-0.000444962	0.0485873	-0.0490323		-3	-2	-4	3	1	10	0	1	-1	0	1	-3	0	3	-1	0	7	0	-1	17	7	30	34	3	14	10	10
PF02229	PC4	Transcriptional Coactivator p15 (PC4)	2	0	26	35	2	3	3	2	23	26	0.910931	1.2688	2.19556	2.36444	0.0188999	0.184941	-0.050291	0.17577	-0.226061		0	0	0	0	0	1	1	0	0	0	0	0	0	0	0	0	0	0	0	1	0	1	0	-1	0	-1	1
PF02230	Abhydrolase_2	Phospholipase/Carboxylesterase	7	8	171	28	10	6	17	2	143	26	0.740132	2.53759	13.5111	2.36444	0.991205	6.00781	-0.4956	1.84641	-2.34201		2	0	-2	1	1	4	-3	2	-1	0	-3	-1	-2	-1	0	-1	17	1	0	25	23	55	56	8	22	5	4
PF02231	0	0	0	0	0	0	0	0	0	0	0	0	0	0	0	0	0	0	FALSE	FALSE	FALSE		0	0	0	0	0	0	0	0	0	0	0	0	0	0	0	0	0	0	0	0	0	0	0	0	0	0	0
PF02233	PNTB	NAD(P) transhydrogenase beta subunit	7	1	47	63	4	4	6	5	44	49	0.947368	0.877193	4.22222	4.56	0.012688	0.0746402	-0.0408082	-0.105298	0.06449		0	0	0	0	0	1	1	0	0	0	1	-1	2	0	1	1	7	0	0	-4	-4	15	2	1	-1	-1	0
PF02234	CDI	Cyclin-dependent kinase inhibitor	0	0	1	8	0	0	0	0	1	8	0	0	0.0844444	0.675556	0.092233	0.737864	-0.118411	-0.40855	0.290139		0	0	0	0	0	0	0	0	0	0	0	0	0	0	0	0	0	0	0	0	0	0	0	0	0	0	0
PF02237	BPL_C	Biotin protein ligase C terminal domain	1	3	1	15	0	2	0	1	2	15	0	1.48026	0.168889	1.35111	0.184466	0.336928	-0.175508	0.250567	-0.426075		0	0	-1	0	0	0	0	-1	0	0	0	-1	0	0	0	0	1	0	0	0	0	0	-1	0	0	0	0
PF02238	COX7a	Cytochrome c oxidase subunit VII	0	0	0	14	0	1	0	0	0	13	0	0.910931	0	1.09778	0	0.00944995	FALSE	-0.0350059	FALSE		0	0	0	0	0	0	0	0	0	0	0	0	0	0	0	0	0	0	0	0	0	0	0	0	0	0	0
PF02239	Cytochrom_D1	Cytochrome D1 heme domain	0	0	29	56	2	5	0	5	25	43	0.947368	1.23355	2.11111	4.05333	0.00634398	0.239406	-0.0284847	0.204373	-0.232858		0	0	0	0	0	0	0	0	0	0	0	0	0	0	0	0	0	0	0	0	-1	1	5	-1	-1	0	-1
PF02244	Propep_M14	Carboxypeptidase activation peptide	0	0	1	12	0	1	0	0	0	9	0	1.31579	0	0.76	0	0.0820232	0	0.110937	-0.110937		0	0	0	0	0	0	0	0	0	0	0	0	0	0	0	0	0	0	0	0	0	0	0	0	0	0	0
PF02245	Pur_DNA_glyco	Methylpurine-DNA glycosylase (MPG)	0	0	0	3	0	0	0	0	0	2	0	0	0	0.168889	0	0.184466	FALSE	-0.175508	FALSE		0	0	0	0	0	0	0	0	0	0	0	0	0	0	0	0	0	0	0	0	0	0	0	0	0	0	0
PF02251	PA28_alpha	Proteasome activator pa28 alpha subunit	0	0	0	0	0	0	0	0	0	0	0	0	0	0	0	0	FALSE	FALSE	FALSE		0	0	0	0	0	0	0	0	0	0	0	0	0	0	0	0	0	0	0	0	0	0	0	0	0	0	0
PF02252	PA28_beta	Proteasome activator pa28 beta subunit	2	3	21	15	2	1	2	0	17	17	1.24654	0.696594	1.60444	1.43556	0.105586	0.143603	0.127712	-0.15198	0.279692		-1	0	0	0	0	0	0	0	0	1	-1	0	0	0	0	0	-1	1	0	0	0	0	1	0	0	0	0
PF02254	TrkA_N	TrkA-N domain	4	4	58	51	2	7	9	2	48	41	0.415512	1.92778	4.81333	3.63111	1.79042	3.37037	-0.742623	1.17797	-1.92059		1	0	-1	0	0	3	0	1	0	0	0	0	-1	0	-1	0	-2	1	0	0	-1	4	3	-1	0	0	1
PF02256	Fe_hyd_SSU	Iron hydrogenase small subunit	0	7	11	45	1	5	0	7	10	38	1.18421	1.31579	0.844444	3.8	0.0310377	0.410116	0.0654226	0.282404	-0.216981		0	0	0	-1	0	0	-1	0	0	0	-1	-1	-1	0	0	0	-1	-1	0	0	0	0	0	0	0	0	1
PF02259	FAT	FAT domain	6	2	60	76	8	4	6	8	49	60	1.72249	0.696594	4.64444	5.74222	2.6173	0.574411	0.975908	-0.348226	1.32413		0	-1	0	2	0	0	1	0	0	0	2	1	0	1	0	1	-1	0	0	0	-1	0	0	0	1	0	0
PF02260	FATC	FATC domain	6	2	61	71	5	8	7	5	52	56	1.00357	1.55306	4.98222	5.15111	6.87906e-05	1.70273	0.00288353	0.716854	-0.713971		1	-2	0	1	1	0	1	0	0	0	0	1	1	-1	0	0	0	0	0	0	0	0	2	0	0	0	0
PF02261	Asp_decarbox	Aspartate decarboxylase	0	0	2	11	0	1	0	4	2	6	0	1.18421	0.168889	0.844444	0.184466	0.0310377	-0.175508	0.0654226	-0.24093		0	0	0	0	0	0	0	0	0	0	0	0	0	0	0	0	0	0	0	0	0	0	0	0	0	0	0
PF02263	GBP	Guanylate-binding protein, N-terminal domain	3	6	58	57	5	6	6	5	48	49	1.09649	1.31579	4.56	4.56	0.0460123	0.492139	0.0808417	0.316076	-0.235234		0	-1	-1	5	0	3	0	0	-1	0	0	-3	-2	0	0	0	8	0	-1	0	-11	8	3	-9	3	0	0
PF02264	LamB	LamB porin	0	0	0	0	0	0	0	0	0	0	0	0	0	0	0	0	FALSE	FALSE	FALSE		0	0	0	0	0	0	0	0	0	0	0	0	0	0	0	0	0	0	0	0	0	0	0	0	0	0	0
PF02265	S1-P1_nuclease	S1/P1 Nuclease	1	3	15	28	0	5	1	3	12	22	0	2.36842	1.09778	2.11111	1.19903	4.25246	-0.563018	1.40679	-1.9698		0	-1	0	0	0	0	0	0	0	0	-1	0	-1	0	0	0	5	0	0	1	0	-1	12	-2	0	0	-1
PF02268	TFIIA_gamma_N	Transcription initiation factor IIA, gamma subunit, helical domain	0	5	5	33	0	3	1	2	4	31	0	1.07656	0.422222	2.78667	0.461165	0.017702	-0.303574	0.0485873	-0.352161		-1	-1	0	0	0	-1	0	0	0	0	-1	0	0	0	0	0	-1	0	0	0	0	0	0	0	0	0	0
PF02269	TFIID-18kDa	Transcription initiation factor IID, 18kD subunit	0	3	12	25	2	0	0	1	9	24	2.63158	0	0.76	2.11111	2.17331	2.30583	0.852561	-0.889781	1.74234		-1	-1	0	0	0	0	0	0	0	0	0	0	0	0	0	0	-1	0	0	0	0	0	0	0	0	0	0
PF02270	TFIIF_beta	TFIIF, beta subunit HTH domain	0	2	15	43	0	2	2	6	13	34	0	0.592105	1.26667	3.37778	1.3835	0.611138	-0.620682	-0.362151	-0.258532		-1	0	0	0	0	0	0	0	0	0	0	0	0	0	0	0	-1	0	0	0	0	0	0	0	0	-1	0
PF02271	UCR_14kD	Ubiquinol-cytochrome C reductase complex 14kD subunit	3	1	23	47	1	2	3	2	21	39	0.493421	0.577664	2.02667	3.46222	0.565969	0.671627	-0.344991	-0.384592	0.0396007		0	-1	0	1	0	0	0	0	0	0	1	0	0	0	0	0	1	0	0	0	-1	0	2	-1	0	0	0
PF02272	DHHA1	DHHA1 domain	1	5	33	51	0	8	1	3	32	41	0	2.15311	2.78667	3.71556	3.04369	5.32061	-1.09124	1.67624	-2.76748		0	0	-1	1	0	0	0	-1	0	0	-1	0	-1	0	-1	0	0	0	0	0	0	0	1	0	0	1	0
PF02274	Amidinotransf	Amidinotransferase	1	4	21	40	1	4	5	3	13	35	0.657895	1.24654	1.52	3.20889	0.193364	0.211172	-0.18037	0.189868	-0.370238		-1	0	0	0	0	0	-1	1	0	0	-1	0	0	0	-1	0	0	0	0	0	-2	3	2	-1	0	-1	0
PF02275	CBAH	Linear amide C-N hydrolases, choloylglycine hydrolase family	3	7	29	48	0	8	0	6	29	38	0	2.15311	2.44889	3.71556	2.67476	5.32061	-0.991609	1.67624	-2.66785		0	0	0	2	0	0	-1	0	0	0	0	-1	-1	-1	-1	-1	3	5	-2	0	-1	0	5	0	-1	-1	0
PF02277	DBI_PRT	Phosphoribosyltransferase	2	7	16	48	0	6	3	5	14	43	0	1.48026	1.43556	4.05333	1.56796	1.01078	-0.676741	0.502082	-1.17882		0	0	-1	0	0	0	0	-1	0	0	-1	-1	0	-1	0	1	-1	1	-1	0	-1	0	1	0	0	0	0
PF02278	Lyase_8	Polysaccharide lyase family 8, super-sandwich domain	0	0	2	4	0	0	0	0	1	3	0	0	0.0844444	0.253333	0.092233	0.276699	-0.118411	-0.222665	0.104254		0	0	0	0	0	0	0	0	0	0	0	0	0	0	0	0	0	0	0	0	0	0	0	0	0	0	0
PF02282	Herpes_UL42	DNA polymerase processivity factor (UL42)	0	0	0	0	0	0	0	0	0	0	0	0	0	0	0	0	FALSE	FALSE	FALSE		0	0	0	0	0	0	0	0	0	0	0	0	0	0	0	0	0	0	0	0	0	0	0	0	0	0	0
PF02283	CobU	Cobinamide kinase / cobinamide phosphate guanyltransferase	2	5	4	26	0	4	0	5	6	22	0	1.75439	0.506667	2.28	0.553398	1.40055	-0.340148	0.625928	-0.966076		0	0	-1	0	0	0	0	0	0	0	-1	0	0	0	-1	1	-1	1	-1	0	0	0	0	0	0	0	0
PF02284	COX5A	Cytochrome c oxidase subunit Va	0	0	1	12	0	0	0	0	1	12	0	0	0.0844444	1.01333	0.092233	1.1068	-0.118411	-0.533459	0.415048		0	0	0	0	0	0	0	0	0	0	0	0	0	0	0	0	0	0	0	0	0	0	7	0	0	0	0
PF02290	SRP14	Signal recognition particle 14kD protein	1	2	7	21	0	2	0	0	7	19	0	1.24654	0.591111	1.60444	0.645631	0.105586	-0.375018	0.127712	-0.50273		-1	0	0	1	0	0	0	0	0	0	-1	0	0	0	0	0	0	0	0	0	0	0	1	0	0	0	0
PF02291	TFIID-31kDa	Transcription initiation factor IID, 31kD subunit	2	4	22	49	5	2	2	4	16	45	3.28947	0.483351	1.52	4.13778	8.53117	1.202	2.45703	-0.563962	3.02099		-1	0	1	2	0	0	0	0	-1	0	0	0	0	0	0	0	-1	-1	0	0	-1	0	-1	0	0	0	0
PF02295	z-alpha	Adenosine deaminase z-alpha domain	1	3	4	26	0	3	1	2	3	21	0	1.54462	0.337778	1.94222	0.368932	0.622598	-0.264731	0.366447	-0.631178		0	0	0	0	0	-1	-1	0	0	0	0	-1	0	0	0	0	2	0	0	0	0	0	0	0	0	0	0
PF02296	Alpha_adaptin_C	Alpha adaptin AP2, C-terminal domain	2	4	36	22	1	5	4	0	30	19	0.348297	3.11634	2.87111	1.60444	1.32838	7.70099	-0.603637	2.25813	-2.86177		0	0	-1	0	0	0	0	-1	0	0	0	1	-1	0	0	0	-1	0	1	1	-1	0	2	0	-1	0	0
PF02297	COX6B	Cytochrome oxidase c subunit VIb	1	1	33	39	3	1	0	1	30	34	1.18421	0.338346	2.53333	2.95556	0.093113	1.40963	0.11904	-0.628715	0.747754		0	0	1	0	0	0	0	0	0	0	0	0	0	0	0	0	-1	0	0	0	0	0	4	-1	0	0	0
PF02298	Cu_bind_like	Plastocyanin-like domain	0	0	15	35	0	2	6	2	9	31	0	0.717703	1.26667	2.78667	1.3835	0.241284	-0.620682	-0.205317	-0.415366		0	0	0	0	0	0	0	0	0	0	0	0	0	0	0	0	0	0	0	0	0	0	0	0	0	0	0
PF02301	HORMA	HORMA domain	4	4	48	45	7	2	4	3	40	43	1.88397	0.514874	3.71556	3.88444	3.1315	0.994689	1.11468	-0.496755	1.61143		1	0	2	0	0	0	-1	0	1	0	2	0	-1	0	-1	0	-1	0	0	0	0	-1	2	-1	0	-1	1
PF02308	MgtC	MgtC family	4	5	35	48	0	4	3	3	36	44	0	1.00784	3.29333	3.96889	3.59709	0.000264452	-1.23746	0.00567168	-1.24314		1	-2	0	7	0	0	0	0	0	0	-1	-1	0	0	-1	1	0	-1	2	-1	-1	-1	-1	0	0	1	0
PF02309	AUX_IAA	AUX/IAA family	0	0	0	0	0	0	0	0	0	0	0	0	0	0	0	0	FALSE	FALSE	FALSE		0	0	0	0	0	0	0	0	0	0	0	0	0	0	0	0	0	0	0	0	0	0	0	0	0	0	0
PF02310	B12-binding	B12 binding domain	1	4	51	47	4	4	4	3	41	41	1.05263	1.07656	3.8	3.71556	0.0114113	0.0236027	0.0386126	0.0565548	-0.0179422		-1	0	0	1	0	0	0	0	0	0	0	0	-1	0	0	0	-2	-2	0	0	-1	0	7	-1	0	-1	0
PF02311	AraC_binding	AraC-like ligand binding domain	1	1	28	45	0	4	6	3	20	37	0	1.18421	2.19556	3.37778	2.39806	0.124151	-0.915474	0.139916	-1.05539		0	0	0	0	1	0	0	0	0	0	0	0	0	0	0	0	0	-1	0	0	0	0	1	0	1	-1	0
PF02317	Octopine_DH	NAD/NADP octopine/nopaline dehydrogenase, alpha-helical domain	3	4	36	48	2	5	2	6	32	36	0.696594	1.40977	2.87111	3.54667	0.287205	0.644147	-0.227666	0.374468	-0.602134		-1	0	0	0	0	0	0	0	0	0	-2	-1	1	0	-1	2	2	0	0	0	3	1	0	-5	0	1	-1
PF02319	E2F_TDP	E2F/DP family winged-helix DNA-binding domain	4	4	46	50	2	5	10	7	36	40	0.514874	1.2598	3.88444	3.96889	0.994689	0.290016	-0.496755	0.228993	-0.725749		0	1	0	0	1	0	0	0	0	0	-1	0	-1	0	2	0	-2	-1	1	0	0	0	1	0	0	1	-1
PF02320	UCR_hinge	Ubiquinol-cytochrome C reductase hinge protein	2	4	15	58	1	3	1	5	14	51	0.789474	0.634398	1.26667	4.72889	0.0609669	0.687161	-0.094218	-0.390265	0.296047		0	-1	0	2	1	0	0	0	-1	0	0	0	0	0	-1	0	-1	0	0	2	0	-1	-1	-1	0	-1	0
PF02321	OEP	Outer membrane efflux protein	0	5	5	25	0	4	0	5	4	21	0	1.82186	0.337778	2.19556	0.368932	1.60011	-0.264731	0.68637	-0.9511		0	0	0	0	-1	-1	0	0	0	0	-1	0	0	0	-1	0	-1	0	0	0	0	0	0	0	0	-1	0
PF02324	Glyco_hydro_70	Glycosyl hydrolase family 70	0	0	1	10	0	1	0	1	0	8	0	1.31579	0	0.76	0	0.0820232	0	0.110937	-0.110937		0	0	0	0	0	0	0	0	0	0	0	0	0	0	0	0	0	0	0	0	0	0	0	0	0	0	0
PF02325	YGGT	YGGT family	1	3	46	56	3	3	4	3	37	48	0.866496	0.696594	3.46222	4.30667	0.0669791	0.430808	-0.0992031	-0.291076	0.191873		-1	0	0	0	0	0	0	0	0	-1	0	0	1	0	0	-1	0	0	0	0	0	1	3	-1	0	0	1
PF02330	MAM33	Mitochondrial glycoprotein	3	3	26	31	3	2	3	1	21	28	1.48026	0.816697	2.02667	2.44889	0.505392	0.0893403	0.321354	-0.116329	0.437682		-1	0	-1	0	0	1	0	0	0	0	1	0	0	0	0	-1	0	1	0	0	0	4	2	-2	0	0	0
PF02338	OTU	OTU-like cysteine protease	8	10	174	34	13	3	17	3	143	36	0.962171	0.910931	13.5111	3.29333	0.0209727	0.0283498	-0.0531288	-0.0623372	0.00920846		-3	7	-3	-5	2	4	1	-1	-1	1	-7	0	-1	4	-2	-2	59	5	-4	18	20	34	29	6	15	2	5
PF02341	RcbX	RbcX protein	0	0	0	0	0	0	0	0	0	0	0	0	0	0	0	0	FALSE	FALSE	FALSE		0	0	0	0	0	0	0	0	0	0	0	0	0	0	0	0	0	0	0	0	0	0	0	0	0	0	0
PF02342	TerD	TerD domain	3	3	40	52	4	6	3	5	31	41	1.39319	1.54462	2.87111	3.88444	0.480144	1.2452	0.311263	0.57762	-0.266358		-1	0	-1	1	0	0	0	0	0	0	0	0	-1	2	0	0	2	0	0	5	-1	-1	2	-5	1	0	0
PF02346	Vac_Fusion	Chordopoxvirus multifunctional envelope protein A27	0	0	1	3	0	0	0	0	1	2	0	0	0.0844444	0.168889	0.092233	0.184466	-0.118411	-0.175508	0.0570963		0	0	0	0	0	0	0	0	0	0	0	0	0	0	0	0	0	0	0	0	0	0	0	0	0	0	0
PF02347	GDC-P	Glycine cleavage system P-protein	1	1	39	25	2	3	5	0	32	20	0.640114	1.77632	3.12444	1.68889	0.439915	1.0985	-0.294852	0.530774	-0.825626		0	0	-1	0	0	0	0	0	0	0	2	0	0	0	0	0	0	0	0	0	-2	6	11	0	0	0	0
PF02348	CTP_transf_3	Cytidylyltransferase	1	4	19	36	3	8	2	6	14	24	2.22039	3.15789	1.35111	2.53333	2.16635	12.6391	0.850593	3.42278	-2.57219		0	0	-1	2	0	0	-1	0	0	0	-1	0	0	0	0	0	-1	0	0	0	0	0	1	-2	0	0	0
PF02349	MSG	Major surface glycoprotein	0	0	0	0	0	0	0	0	0	0	0	0	0	0	0	0	FALSE	FALSE	FALSE		0	0	0	0	0	0	0	0	0	0	0	0	0	0	0	0	0	0	0	0	0	0	0	0	0	0	0
PF02350	Epimerase_2	UDP-N-acetylglucosamine 2-epimerase	1	2	5	26	2	3	0	2	4	21	5.92105	1.54462	0.337778	1.94222	8.66785	0.622598	2.48963	0.366447	2.12318		0	0	-1	0	0	0	-1	0	0	0	0	1	0	0	0	0	0	0	0	0	0	0	0	0	0	0	0
PF02353	CMAS	Mycolic acid cyclopropane synthetase	7	8	165	27	14	3	15	3	134	27	1.11268	1.18421	12.5822	2.53333	0.17312	0.093113	0.169185	0.11904	0.0501446		0	-3	-4	4	0	6	-1	1	1	-1	-2	0	-1	1	-1	0	5	-3	3	2	8	6	17	7	12	7	3
PF02355	SecD_SecF	Protein export membrane protein	0	0	3	18	0	3	0	4	3	10	0	2.53759	0.253333	1.18222	0.276699	3.0039	-0.222665	1.08059	-1.30325		0	0	0	0	0	0	0	0	0	0	0	0	0	0	0	0	0	0	0	0	0	0	0	0	0	0	0
PF02357	NusG	Transcription termination factor nusG	0	6	7	36	0	3	1	6	6	32	0	0.934903	0.591111	3.20889	0.645631	0.0147527	-0.375018	-0.0441553	-0.330863		0	0	-1	0	-1	0	-1	0	0	0	0	0	0	0	-1	0	-1	-1	0	0	0	0	0	0	0	0	0
PF02358	Trehalose_PPase	Trehalose-phosphatase	4	6	52	48	1	5	4	5	49	41	0.223436	1.28719	4.47556	3.88444	2.9429	0.346784	-1.06421	0.254973	-1.31918		1	-1	-1	4	0	1	0	0	0	1	-1	0	-1	0	-1	0	0	-1	0	2	-2	0	5	-5	0	0	0
PF02359	CDC48_N	Cell division protein 48 (CDC48), N-terminal domain	4	2	53	40	7	2	7	2	42	35	1.69173	0.640114	4.13778	3.12444	2.13785	0.439915	0.842533	-0.294852	1.13738		0	-1	1	0	0	0	-1	1	0	0	2	0	0	0	0	0	1	0	0	1	-2	0	5	0	1	0	0
PF02361	CbiQ	Cobalt transport protein	0	0	2	19	0	3	0	3	2	12	0	2.36842	0.168889	1.26667	0.184466	2.55148	-0.175508	0.957853	-1.13336		0	0	0	0	0	0	0	0	0	0	0	0	0	0	0	0	0	0	0	0	0	0	0	0	0	0	0
PF02362	B3	B3 DNA binding domain	0	0	5	19	0	1	0	1	5	16	0	0.696594	0.422222	1.43556	0.461165	0.143603	-0.303574	-0.15198	-0.151594		0	0	0	0	0	0	0	0	0	0	0	0	0	0	0	0	0	0	0	0	0	0	0	0	0	0	0
PF02363	C_tripleX	Cysteine rich repeat	0	0	0	0	0	0	0	0	0	0	0	0	0	0	0	0	FALSE	FALSE	FALSE		0	0	0	0	0	0	0	0	0	0	0	0	0	0	0	0	0	0	0	0	0	0	0	0	0	0	0
PF02364	Glucan_synthase	1,3-beta-glucan synthase component	4	2	51	43	3	3	3	2	47	36	0.710526	0.934903	4.22222	3.20889	0.384426	0.0147527	-0.271448	-0.0441553	-0.227293		1	-1	0	0	0	0	-1	0	0	0	1	1	0	0	0	0	6	0	0	0	-3	4	7	-1	0	0	0
PF02366	PMT	Dolichyl-phosphate-mannose-protein mannosyltransferase	0	0	6	19	0	1	1	2	5	16	0	0.657895	0.506667	1.52	0.553398	0.193364	-0.340148	-0.18037	-0.159778		0	0	0	0	0	0	0	0	0	0	0	0	0	0	0	0	0	0	0	0	0	0	0	0	0	0	0
PF02367	TsaE	Threonylcarbamoyl adenosine biosynthesis protein TsaE	1	0	16	51	0	4	0	2	16	44	0	1.02975	1.35111	3.88444	1.47573	0.00372714	-0.648892	0.0216738	-0.670566		0	0	0	2	0	0	0	0	0	0	0	0	0	0	0	0	0	0	0	0	-1	0	0	0	0	0	0
PF02368	Big_2	Bacterial Ig-like domain (group 2)	0	0	1	12	0	3	0	0	1	9	0	3.94737	0.0844444	0.76	0.092233	7.04851	-0.118411	2.10056	-2.21897		0	0	0	0	0	0	0	0	0	0	0	0	0	0	0	0	0	0	0	0	0	0	0	0	0	0	0
PF02369	Big_1	Bacterial Ig-like domain (group 1)	0	0	12	31	1	2	1	2	9	27	1.18421	0.816697	0.844444	2.44889	0.0310377	0.0893403	0.0654226	-0.116329	0.181751		0	0	0	0	0	0	0	0	0	0	0	0	0	0	0	0	0	0	0	0	0	0	0	0	0	0	0
PF02371	Transposase_20	Transposase IS116/IS110/IS902 family	0	0	2	9	0	1	0	2	2	6	0	1.48026	0.168889	0.675556	0.184466	0.168464	-0.175508	0.166546	-0.342054		0	0	0	0	0	0	0	0	0	0	0	0	0	0	0	0	0	0	0	0	0	0	0	0	0	0	0
PF02373	JmjC	JmjC domain, hydroxylase	6	8	175	34	13	4	16	3	144	33	0.962171	1.31579	13.5111	3.04	0.0209727	0.328093	-0.0531288	0.246582	-0.299711		-3	-1	-7	7	0	9	0	1	0	-1	-1	-2	-6	5	0	1	6	0	-1	14	10	28	34	3	9	6	7
PF02374	ArsA_ATPase	Anion-transporting ATPase	5	7	63	52	4	7	7	1	54	47	0.776531	1.72697	5.15111	4.05333	0.279377	2.31258	-0.223946	0.891669	-1.11561		0	-3	-1	2	0	1	-1	0	1	0	2	0	0	-1	-2	0	-3	-1	1	0	-1	0	2	-2	4	-1	1
PF02375	JmjN	jmjN domain	5	4	33	54	4	2	6	4	26	49	1.48026	0.446872	2.70222	4.47556	0.673856	1.49059	0.385408	-0.653404	1.03881		-1	3	0	-1	1	0	0	0	0	1	0	-2	0	1	0	0	-1	1	0	0	0	0	0	0	0	0	1
PF02378	PTS_EIIC	Phosphotransferase system, EIIC	0	0	0	0	0	0	0	0	0	0	0	0	0	0	0	0	FALSE	FALSE	FALSE		0	0	0	0	0	0	0	0	0	0	0	0	0	0	0	0	0	0	0	0	0	0	0	0	0	0	0
PF02381	MraZ	MraZ protein, putative antitoxin-like	0	0	2	11	0	3	0	1	2	7	0	4.44079	0.168889	0.675556	0.184466	8.52125	-0.175508	2.45466	-2.63017		0	0	0	0	0	0	0	0	0	0	0	0	0	0	0	0	0	0	0	0	0	0	0	0	0	0	0
PF02383	Syja_N	SacI homology domain	4	6	45	64	4	4	7	6	35	55	1.12782	0.776531	3.54667	5.15111	0.0627857	0.279377	0.0957466	-0.223946	0.319692		0	-1	0	0	-1	2	-1	1	0	1	0	-1	2	-1	-1	0	0	0	0	0	-1	0	3	0	0	0	1
PF02384	N6_Mtase	N-6 DNA Methylase	2	3	4	33	1	5	0	6	5	25	2.36842	1.91002	0.422222	2.61778	0.850493	2.33786	0.448046	0.898725	-0.450679		0	0	-1	0	0	2	0	0	-1	0	-1	0	1	0	0	0	0	0	0	0	0	0	0	0	0	1	-1
PF02386	TrkH	Cation transport protein	2	3	20	23	2	6	0	1	18	17	1.31579	3.94737	1.52	1.52	0.164046	14.097	0.164019	3.7604	-3.59638		0	0	-1	1	0	2	0	0	0	0	-1	0	-1	0	0	0	0	0	0	0	0	1	0	0	0	0	0
PF02388	FemAB	FemAB family	0	0	0	0	0	0	0	0	0	0	0	0	0	0	0	0	FALSE	FALSE	FALSE		0	0	0	0	0	0	0	0	0	0	0	0	0	0	0	0	0	0	0	0	0	0	0	0	0	0	0
PF02389	Cornifin	Cornifin (SPRR) family	0	0	2	37	0	2	0	4	2	28	0	0.740132	0.168889	2.70222	0.184466	0.198241	-0.175508	-0.183001	0.0074928		0	0	0	0	0	0	0	0	0	0	0	0	0	0	0	0	0	0	0	0	0	0	0	0	0	0	0
PF02390	Methyltransf_4	Putative methyltransferase	7	4	65	71	7	8	6	4	54	59	1.38158	1.50376	5.06667	5.32	0.798071	1.45943	0.429842	0.643934	-0.214093		-4	-2	-1	3	1	1	0	0	0	0	6	0	0	4	0	0	1	1	-2	1	-2	2	5	-4	0	0	2
PF02391	MoaE	MoaE protein	2	1	23	44	0	3	4	3	21	36	0	0.910931	2.11111	3.29333	2.30583	0.0283498	-0.889781	-0.0623372	-0.827444		0	-1	0	1	0	0	0	0	0	0	0	0	0	0	0	0	0	1	0	0	0	0	0	-1	0	0	0
PF02392	Ycf4	Ycf4	1	6	5	8	0	1	1	1	4	12	0	0.910931	0.422222	1.09778	0.461165	0.00944995	-0.303574	-0.0350059	-0.268568		0	0	0	0	-1	0	0	0	0	-1	-1	-1	0	0	-1	0	0	2	-1	0	0	1	1	-1	0	0	0
PF02397	Bac_transf	Bacterial sugar transferase	0	0	1	8	0	1	0	1	1	6	0	1.69173	0.0844444	0.591111	0.092233	0.305407	-0.118411	0.236188	-0.3546		0	0	0	0	0	0	0	0	0	0	0	0	0	0	0	0	0	0	0	0	0	0	0	0	0	0	0
PF02399	Herpes_ori_bp	Origin of replication binding protein	0	0	0	0	0	0	0	0	0	0	0	0	0	0	0	0	FALSE	FALSE	FALSE		0	0	0	0	0	0	0	0	0	0	0	0	0	0	0	0	0	0	0	0	0	0	0	0	0	0	0
PF02401	LYTB	LytB protein	3	1	33	22	1	0	4	1	30	18	0.348297	0	2.87111	1.60444	1.32838	1.75243	-0.603637	-0.731488	0.127851		0	-1	0	1	0	0	0	0	0	0	0	0	0	0	0	0	1	1	0	0	0	0	0	0	0	0	-1
PF02403	Seryl_tRNA_N	Seryl-tRNA synthetase N-terminal domain	3	4	38	45	1	1	6	2	33	44	0.303644	0.257437	3.29333	3.88444	1.74026	2.33485	-0.727912	-0.897885	0.169973		0	0	0	0	0	0	0	0	-1	0	0	0	-1	1	0	1	-1	1	-1	1	0	-1	4	-3	1	0	0
PF02405	MlaE	Permease MlaE	1	6	14	36	2	4	0	3	13	34	1.82186	1.28023	1.09778	3.12444	0.800055	0.265595	0.430536	0.217311	0.213225		-1	0	0	1	0	0	0	0	0	0	-1	0	-1	0	-1	0	-1	0	-1	0	0	0	0	0	0	0	-1
PF02406	MmoB_DmpM	MmoB/DmpM family	0	0	1	4	1	0	0	1	0	3	0	0	0	0.337778	0	0.368932	0	-0.264731	0.264731		0	0	0	0	0	0	0	0	0	0	0	0	0	0	0	0	0	0	0	0	0	0	0	0	0	0	0
PF02407	Viral_Rep	Putative viral replication protein	0	0	1	10	0	1	1	2	0	7	0	1.31579	0.0844444	0.76	0.092233	0.0820232	-0.118411	0.110937	-0.229349		0	0	0	0	0	0	0	0	0	0	0	0	0	0	0	0	0	0	0	0	-1	0	-1	0	0	0	0
PF02408	CUB_2	CUB-like domain	0	0	0	0	0	0	0	0	0	0	0	0	0	0	0	0	FALSE	FALSE	FALSE		0	0	0	0	0	0	0	0	0	0	0	0	0	0	0	0	0	0	0	0	0	0	0	0	0	0	0
PF02409	0	0	0	0	0	0	0	0	0	0	0	0	0	0	0	0	0	0	FALSE	FALSE	FALSE		0	0	0	0	0	0	0	0	0	0	0	0	0	0	0	0	0	0	0	0	0	0	0	0	0	0	0
PF02410	RsfS	Ribosomal silencing factor during starvation	4	3	39	51	3	2	6	1	33	47	0.910931	0.493421	3.29333	4.05333	0.0283498	1.13194	-0.0623372	-0.54157	0.479233		-1	-2	0	0	1	0	0	0	1	0	1	0	0	1	0	0	0	-1	0	0	-1	1	0	0	0	0	0
PF02412	TSP_3	Thrombospondin type 3 repeat	0	0	17	42	1	4	0	4	15	31	0.789474	1.35338	1.26667	2.95556	0.0609669	0.399354	-0.094218	0.277841	-0.372059		0	0	0	0	0	0	0	0	0	0	0	0	0	0	0	0	0	0	0	3	-1	0	1	-2	-1	0	-1
PF02415	Chlam_PMP	Chlamydia polymorphic membrane protein (Chlamydia_PMP) repeat	0	0	14	43	2	5	0	6	10	30	2.36842	1.64474	0.844444	3.04	1.70099	1.36489	0.716339	0.614944	0.101395		0	0	0	0	0	0	0	0	0	0	0	0	0	0	0	0	0	0	0	0	0	0	0	0	0	-1	0
PF02416	TatA_B_E	mttA/Hcf106 family	2	3	22	36	2	1	3	3	17	34	1.18421	0.320057	1.68889	3.12444	0.0620753	1.57391	0.0951518	-0.678526	0.773678		0	-1	-1	3	0	0	0	0	0	0	0	0	0	0	0	0	-1	0	1	0	0	0	0	0	0	0	0
PF02417	Chromate_transp	Chromate transporter	2	1	31	44	0	3	4	1	27	40	0	0.866496	2.61778	3.46222	2.85922	0.0669791	-1.04167	-0.0992031	-0.942465		0	0	-1	1	0	0	0	0	0	0	0	0	0	0	0	0	1	0	0	0	0	0	1	-1	0	1	0
PF02421	FeoB_N	Ferrous iron transport protein B	8	8	233	0	17	2	21	0	193	6	0.940728	3.94737	18.0711	0.506667	0.068875	4.69901	-0.100737	1.52028	-1.62102		-1	-1	-4	4	5	4	-1	0	0	1	5	2	-3	1	-2	-1	0	-1	1	25	12	21	30	6	18	13	13
PF02423	OCD_Mu_crystall	Ornithine cyclodeaminase/mu-crystallin family	4	6	32	51	1	3	2	6	31	44	0.358852	0.710526	2.78667	4.22222	1.24779	0.384426	-0.578437	-0.271448	-0.306988		-1	-1	-1	1	0	1	0	0	-1	1	0	-1	0	0	1	0	-2	0	0	0	-2	2	3	-3	0	-1	0
PF02424	ApbE	ApbE family	0	0	10	26	0	2	1	3	8	20	0	1.02975	0.76	1.94222	0.830097	0.00186357	-0.440998	0.0152177	-0.456216		0	0	0	0	0	0	0	0	0	0	0	0	0	0	0	0	0	0	0	0	0	0	0	0	0	0	0
PF02426	MIase	Muconolactone delta-isomerase	0	0	0	3	0	0	0	0	0	3	0	0	0	0.253333	0	0.276699	FALSE	-0.222665	FALSE		0	0	0	0	0	0	0	0	0	0	0	0	0	0	0	0	0	0	0	0	0	0	0	0	0	0	0
PF02427	PSI_PsaE	Photosystem I reaction centre subunit IV / PsaE	3	4	23	49	2	3	5	6	17	40	1.07656	0.772311	1.85778	3.88444	0.0118013	0.218717	0.0392949	-0.193807	0.233102		0	0	0	1	0	0	0	0	0	-1	-1	0	0	0	-1	0	4	2	-1	0	1	-1	2	-1	1	0	0
PF02429	PCP	Peridinin-chlorophyll A binding protein	0	0	14	24	1	1	1	1	12	19	0.910931	0.592105	1.09778	1.68889	0.00944995	0.305569	-0.0350059	-0.236264	0.201258		0	0	0	0	0	0	0	0	0	0	0	0	0	0	0	0	0	0	0	8	0	0	-1	-1	-10	0	0
PF02431	Chalcone	Chalcone-flavanone isomerase	0	3	55	55	3	3	6	3	46	46	0.683198	0.725027	4.39111	4.13778	0.478944	0.339906	-0.310779	-0.251902	-0.0588771		0	0	0	0	0	0	0	0	0	-1	0	-1	0	0	0	0	-1	0	0	0	1	0	3	-1	1	0	-2
PF02434	Fringe	Fringe-like	4	7	46	57	2	8	5	3	41	49	0.514874	1.82186	3.88444	4.39111	0.994689	3.20022	-0.496755	1.13295	-1.62971		0	1	0	0	1	0	-1	0	-1	3	-1	-1	-2	0	-1	0	5	-1	0	0	0	5	1	-6	0	0	0
PF02436	PYC_OADA	Conserved carboxylase domain	1	2	40	49	1	5	3	2	36	42	0.303644	1.34569	3.29333	3.71556	1.74026	0.480456	-0.727912	0.311388	-1.0393		0	0	0	0	0	0	0	0	-1	0	0	0	0	0	0	0	-1	0	1	0	1	-2	4	-1	0	0	0
PF02439	Adeno_E3_CR2	Adenovirus E3 region protein CR2	0	0	0	15	0	2	0	2	0	11	0	1.82186	0	1.09778	0	0.800055	FALSE	0.430536	FALSE		0	0	0	0	0	0	0	0	0	0	0	0	0	0	0	0	0	0	0	0	0	0	0	0	0	0	0
PF02441	Flavoprotein	Flavoprotein	2	0	26	50	1	5	3	4	23	40	0.455466	1.34569	2.19556	3.71556	0.708646	0.480456	-0.398055	0.311388	-0.709444		0	0	1	0	0	0	0	0	0	0	0	0	0	0	0	0	0	1	0	0	0	0	0	-1	0	-1	3
PF02445	NadA	Quinolinate synthetase A protein	1	3	15	11	0	2	1	0	15	11	0	2.15311	1.35111	0.928889	1.47573	1.33015	-0.648892	0.604188	-1.25308		0	0	0	0	0	0	0	0	-1	0	-1	0	0	0	0	1	-1	0	0	0	0	0	0	0	0	0	0
PF02446	Glyco_hydro_77	4-alpha-glucanotransferase	0	0	8	19	0	1	1	3	7	14	0	0.696594	0.675556	1.43556	0.737864	0.143603	-0.40855	-0.15198	-0.25657		0	0	0	0	0	0	0	0	0	0	0	0	0	0	0	0	0	0	0	0	0	0	0	0	0	0	0
PF02447	GntP_permease	GntP family permease	0	0	2	7	0	1	0	1	1	4	0	2.36842	0.0844444	0.422222	0.092233	0.850493	-0.118411	0.448046	-0.566458		0	0	0	0	0	0	0	0	0	0	0	0	0	0	0	0	0	0	0	0	0	0	0	0	0	0	0
PF02449	Glyco_hydro_42	Beta-galactosidase	3	4	16	48	1	6	0	3	15	40	0.789474	1.65239	1.26667	3.63111	0.0609669	1.66912	-0.094218	0.706911	-0.801129		2	0	0	0	0	1	0	-1	0	0	-1	-1	0	-1	0	0	1	0	0	0	0	0	10	-3	-1	0	0
PF02450	LCAT	Lecithin:cholesterol acyltransferase	5	3	65	61	7	5	6	7	54	47	1.38158	1.09649	5.06667	4.56	0.798071	0.0460123	0.429842	0.0808417	0.349		1	-3	0	3	4	0	0	0	0	0	-3	0	1	0	-1	0	3	0	0	0	-2	0	2	-5	4	1	0
PF02453	Reticulon	Reticulon	0	0	24	20	3	2	1	1	18	16	1.86981	1.39319	1.60444	1.43556	1.30935	0.240072	0.597718	0.204708	0.39301		0	0	0	0	0	0	0	0	0	0	0	0	0	0	0	0	0	0	0	1	0	0	2	0	0	0	0
PF02457	DAC	DisA bacterial checkpoint controller nucleotide-binding	0	0	2	17	0	1	0	1	2	15	0	0.740132	0.168889	1.35111	0.184466	0.0991205	-0.175508	-0.12327	-0.0522379		0	0	0	0	0	0	0	0	0	0	0	0	0	0	0	0	0	0	0	0	-1	-1	-1	-1	0	0	0
PF02458	Transferase	Transferase family	2	4	25	56	1	9	1	3	23	45	0.493421	2.22039	2.02667	4.05333	0.565969	6.49904	-0.344991	1.96685	-2.31184		0	-1	-1	0	0	0	1	0	0	0	-1	0	-1	0	0	0	3	0	0	0	-1	1	2	-2	0	-1	1
PF02460	Patched	Patched family	7	8	165	30	12	6	15	2	137	28	0.934903	2.36842	12.8356	2.53333	0.0590106	5.10296	-0.0925529	1.62187	-1.71443		5	-8	-3	4	0	2	-1	3	0	0	-2	-1	4	-2	0	-1	15	1	-1	13	17	16	35	4	26	6	21
PF02462	Opacity	Opacity family porin protein	0	0	1	12	0	2	0	3	1	6	0	2.63158	0.0844444	0.76	0.092233	2.17331	-0.118411	0.852561	-0.970972		0	0	0	0	0	0	0	0	0	0	0	0	0	0	0	0	0	0	0	0	0	0	0	0	0	0	0
PF02463	SMC_N	RecF/RecN/SMC N terminal domain	7	4	187	46	11	5	17	4	157	39	0.748639	1.37699	14.6933	3.63111	1.00846	0.55829	-0.501313	0.342036	-0.843349		0	-3	0	5	2	0	0	0	-1	0	3	-2	0	1	1	-2	3	1	0	117	63	151	225	32	69	43	49
PF02464	CinA	Competence-damaged protein	1	6	24	50	0	6	5	4	17	45	0	1.45005	1.85778	4.13778	2.02913	0.906282	-0.811608	0.467115	-1.27872		-1	-1	0	2	0	0	0	0	0	0	-1	0	-1	0	-1	0	0	0	-1	0	0	0	1	-2	0	0	0
PF02465	FliD_N	Flagellar hook-associated protein 2 N-terminus	0	0	0	0	0	0	0	0	0	0	0	0	0	0	0	0	FALSE	FALSE	FALSE		0	0	0	0	0	0	0	0	0	0	0	0	0	0	0	0	0	0	0	0	0	0	0	0	0	0	0
PF02466	Tim17	Tim17/Tim22/Tim23/Pmp24 family	5	5	56	70	5	6	5	4	50	62	1.07656	1.07656	4.64444	5.57333	0.0295033	0.035404	0.0636763	0.0701972	-0.00652092		-1	-2	-1	3	2	1	0	0	-1	1	0	0	0	1	-1	0	0	0	0	2	0	0	3	-2	1	0	1
PF02469	Fasciclin	Fasciclin domain	4	11	150	39	10	4	17	2	121	42	0.858124	1.07656	11.6533	3.71556	0.254617	0.0236027	-0.211943	0.0565548	-0.268498		-3	5	0	-2	63	-2	0	0	-1	0	-3	-1	-1	1	-14	-7	-3	6	-8	1	0	1	6	0	5	11	12
PF02470	MlaD	MlaD protein	0	0	6	21	0	1	0	4	6	15	0	0.623269	0.506667	1.60444	0.553398	0.247574	-0.340148	-0.208458	-0.13169		0	0	0	0	0	0	0	0	0	0	0	0	0	0	0	0	0	0	0	0	0	0	0	0	0	0	0
PF02472	ExbD	Biopolymer transport protein ExbD/TolR	0	0	2	16	0	3	0	4	2	8	0	2.96053	0.168889	1.01333	0.184466	4.1771	-0.175508	1.38749	-1.563		0	0	0	0	0	0	0	0	0	0	0	0	0	0	0	0	0	0	0	0	0	0	0	0	0	0	0
PF02475	Met_10	Met-10+ like-protein	7	8	59	77	6	8	5	7	51	68	1.2688	1.26316	4.72889	6.33333	0.369883	0.474828	0.265146	0.309118	-0.0439726		-2	0	-2	3	2	5	1	0	-1	0	-3	0	-1	1	-1	-1	6	2	-1	0	-4	2	3	-9	2	0	3
PF02480	Herpes_gE	Alphaherpesvirus glycoprotein E	0	0	2	14	0	2	1	1	1	10	0	2.15311	0.168889	0.928889	0.184466	1.33015	-0.175508	0.604188	-0.779696		0	0	0	0	0	0	0	0	0	0	0	0	0	0	0	0	0	0	0	0	0	0	0	0	0	0	0
PF02481	DNA_processg_A	DNA recombination-mediator protein A	0	0	6	36	0	2	0	2	5	31	0	0.717703	0.422222	2.78667	0.461165	0.241284	-0.303574	-0.205317	-0.098257		0	0	0	0	0	0	0	0	0	0	0	0	0	0	0	0	0	0	0	0	0	0	0	0	0	0	0
PF02482	Ribosomal_S30AE	Sigma 54 modulation protein / S30EA ribosomal protein	2	2	27	24	2	3	2	1	25	21	0.877193	1.61483	2.28	1.85778	0.0373201	0.758652	-0.0722116	0.415951	-0.488162		0	0	0	1	1	0	0	0	0	0	0	0	0	0	0	0	-1	-1	0	0	0	0	0	0	0	0	0
PF02483	0	0	0	0	0	0	0	0	0	0	0	0	0	0	0	0	0	0	FALSE	FALSE	FALSE		0	0	0	0	0	0	0	0	0	0	0	0	0	0	0	0	0	0	0	0	0	0	0	0	0	0	0
PF02485	Branch	Core-2/I-Branching enzyme	5	4	58	65	7	6	5	4	49	54	1.53509	1.22505	4.56	4.89778	1.4111	0.268606	0.629165	0.21877	0.410395		-3	0	-1	0	0	1	0	0	0	1	0	-1	0	2	0	0	6	1	-1	2	-4	0	6	-9	0	1	0
PF02487	CLN3	CLN3 protein	2	4	31	48	1	6	1	1	27	41	0.422932	1.69173	2.36444	3.54667	0.857272	1.83244	-0.45038	0.754883	-1.20526		0	1	-1	-1	0	0	0	0	1	-1	0	0	-1	0	0	0	0	0	0	0	0	0	0	0	0	2	-1
PF02492	cobW	CobW/HypB/UreG, nucleotide-binding domain	7	10	235	0	15	4	21	0	196	6	0.818579	7.89474	18.3244	0.506667	0.654848	25.3711	-0.378424	6.32518	-6.7036		5	-5	-3	13	3	3	-5	3	-1	0	-6	0	-3	-4	-4	-1	23	1	-1	51	21	53	70	10	25	8	8
PF02493	MORN	MORN repeat	8	9	70	135	3	14	8	12	62	112	0.507519	1.33701	5.91111	10.4711	1.55999	1.28693	-0.674346	0.590718	-1.26506		1	-7	1	25	1	19	0	-2	0	-1	37	-9	-16	-1	-4	-2	40	19	-10	0	-19	3	18	-24	-3	-1	2
PF02494	HYR	HYR domain	3	5	10	33	2	6	1	5	10	26	2.15311	2.29202	0.928889	2.61778	1.33015	4.70261	0.604188	1.52119	-0.917004		0	0	1	0	0	-1	0	0	0	0	-1	0	0	0	-1	-1	3	1	-1	0	0	0	2	0	0	2	0
PF02495	TGBp3	Triple gene block 3	0	0	1	3	0	0	0	0	1	3	0	0	0.0844444	0.253333	0.092233	0.276699	-0.118411	-0.222665	0.104254		0	0	0	0	0	0	0	0	0	0	0	0	0	0	0	0	0	0	0	0	0	0	0	0	0	0	0
PF02502	LacAB_rpiB	Ribose/Galactose Isomerase	0	3	6	29	1	4	0	4	5	24	2.36842	1.69173	0.422222	2.36444	0.850493	1.22163	0.448046	0.57018	-0.122134		0	-1	0	0	0	0	0	0	0	0	0	0	-1	0	0	0	-1	0	0	0	0	0	1	0	0	0	0
PF02503	PP_kinase	Polyphosphate kinase middle domain	0	0	4	11	0	1	0	1	4	8	0	1.31579	0.337778	0.76	0.368932	0.0820232	-0.264731	0.110937	-0.375668		0	0	0	0	0	0	0	0	0	0	0	0	0	0	0	0	0	0	0	0	0	0	0	0	0	0	0
PF02504	FA_synthesis	Fatty acid synthesis protein	0	0	5	15	0	3	0	4	4	7	0	3.22967	0.337778	0.928889	0.368932	4.94605	-0.264731	1.58252	-1.84725		0	0	0	0	0	0	0	0	0	0	0	0	0	0	0	0	0	0	0	0	0	0	0	0	0	0	0
PF02507	PSI_PsaF	Photosystem I reaction centre subunit III	0	4	19	38	0	5	2	4	15	29	0	1.79426	1.43556	2.78667	1.56796	1.89708	-0.676741	0.773643	-1.45038		0	0	0	0	0	0	0	0	0	-1	-1	0	0	-1	0	0	0	0	-1	4	0	0	4	-1	0	0	0
PF02508	Rnf-Nqr	Rnf-Nqr subunit, membrane protein	0	0	2	8	0	2	0	1	2	5	0	3.94737	0.168889	0.506667	0.184466	4.69901	-0.175508	1.52028	-1.69579		0	0	0	0	0	0	0	0	0	0	0	0	0	0	0	0	0	0	0	0	0	0	0	0	0	0	0
PF02512	UK	Virulence determinant	0	0	0	0	0	0	0	0	0	0	0	0	0	0	0	0	FALSE	FALSE	FALSE		0	0	0	0	0	0	0	0	0	0	0	0	0	0	0	0	0	0	0	0	0	0	0	0	0	0	0
PF02514	CobN-Mg_chel	CobN/Magnesium Chelatase	4	5	60	57	3	8	7	3	52	46	0.602141	1.9334	4.98222	4.13778	0.857557	3.8872	-0.450478	1.31287	-1.76335		-1	-2	0	1	0	0	0	0	-1	1	-1	0	0	1	-1	0	1	0	0	-2	-4	16	14	0	6	0	0
PF02515	CoA_transf_3	CoA-transferase family III	3	2	30	43	2	5	1	2	27	35	0.845865	1.60028	2.36444	3.12444	0.0609799	1.21635	-0.094229	0.568512	-0.662741		0	0	0	2	0	0	0	0	0	0	1	0	0	-1	0	0	4	-1	0	2	-2	11	23	-14	-2	0	-1
PF02516	STT3	Oligosaccharyl transferase STT3 subunit	3	5	65	42	3	6	4	0	57	38	0.582399	1.86981	5.15111	3.20889	0.976937	2.61871	-0.490856	0.976293	-1.46715		0	0	-1	3	0	1	0	0	-1	0	-1	-1	-1	0	0	0	2	0	0	1	2	-1	0	-3	0	0	0
PF02517	CPBP	CPBP intramembrane metalloprotease	5	9	68	71	5	4	6	9	59	64	0.910931	0.648882	5.48889	6.16444	0.0472497	0.826111	-0.0820116	-0.439616	0.357604		-3	-2	-3	4	3	2	0	0	-1	0	-3	-1	0	4	-2	-1	0	1	-1	0	1	1	0	-3	0	-1	2
PF02518	HATPase_c	Histidine kinase-, DNA gyrase B-, and HSP90-like ATPase	7	9	229	5	17	2	21	0	187	12	0.967864	1.97368	17.5644	1.01333	0.0196747	1.03566	-0.0513672	0.510278	-0.561645		-7	-4	-6	-1	5	8	0	1	0	-2	51	-5	19	6	-1	-3	9	0	-1	10	4	28	54	-5	12	32	40
PF02522	Antibiotic_NAT	Aminoglycoside 3-N-acetyltransferase	0	0	1	1	0	0	0	0	0	0	0	0	0	0	0	0	0	0	0		0	0	0	0	0	0	0	0	0	0	0	0	0	0	0	0	0	0	0	0	0	0	0	0	0	0	0
PF02524	KID	KID repeat	0	0	0	0	0	0	0	0	0	0	0	0	0	0	0	0	FALSE	FALSE	FALSE		0	0	0	0	0	0	0	0	0	0	0	0	0	0	0	0	0	0	0	0	0	0	0	0	0	0	0
PF02525	Flavodoxin_2	Flavodoxin-like fold	4	4	23	39	4	2	2	3	20	35	2.15311	0.623269	1.85778	3.20889	2.6603	0.495148	0.987665	-0.317278	1.30494		0	-1	0	3	2	0	0	-1	0	0	1	-1	0	0	-1	0	3	0	0	0	0	5	0	0	0	0	0
PF02527	GidB	rRNA small subunit methyltransferase G	5	4	16	45	4	2	2	1	13	43	3.15789	0.538278	1.26667	3.71556	6.31955	0.861714	1.92294	-0.451906	2.37485		-1	-1	0	0	0	0	0	1	0	1	2	0	1	1	-1	0	-2	0	0	0	0	0	0	0	-1	0	0
PF02529	PetG	Cytochrome B6-F complex subunit 5	0	0	0	0	0	0	0	0	0	0	0	0	0	0	0	0	FALSE	FALSE	FALSE		0	0	0	0	0	0	0	0	0	0	0	0	0	0	0	0	0	0	0	0	0	0	0	0	0	0	0
PF02530	Porin_2	Porin subfamily	0	0	0	12	0	1	0	1	0	10	0	1.07656	0	0.928889	0	0.00590067	FALSE	0.0274408	FALSE		0	0	0	0	0	0	0	0	0	0	0	0	0	0	0	0	0	0	0	0	0	0	0	0	0	0	0
PF02531	PsaD	PsaD	2	5	19	25	1	5	2	1	18	21	0.592105	2.69139	1.68889	1.85778	0.305569	5.70742	-0.236264	1.77229	-2.00855		-1	0	0	0	0	0	0	0	0	-1	-1	0	-1	0	0	0	2	3	-1	1	0	4	0	-2	0	0	0
PF02533	PsbK	Photosystem II 4 kDa reaction centre component	0	0	0	0	0	0	0	0	0	0	0	0	0	0	0	0	FALSE	FALSE	FALSE		0	0	0	0	0	0	0	0	0	0	0	0	0	0	0	0	0	0	0	0	0	0	0	0	0	0	0
PF02534	T4SS-DNA_transf	Type IV secretory system Conjugative DNA transfer	0	0	0	0	0	0	0	0	0	0	0	0	0	0	0	0	FALSE	FALSE	FALSE		0	0	0	0	0	0	0	0	0	0	0	0	0	0	0	0	0	0	0	0	0	0	0	0	0	0	0
PF02535	Zip	ZIP Zinc transporter	8	7	173	31	13	2	16	3	144	31	0.962171	0.696594	13.5111	2.87111	0.0209727	0.287205	-0.0531288	-0.227666	0.174537		-3	-3	-3	9	-1	7	-1	0	-1	0	0	1	-2	3	1	2	2	0	1	15	12	20	32	2	11	6	4
PF02536	mTERF	mTERF	7	8	54	98	3	10	8	6	47	86	0.645933	1.28719	4.64444	7.76889	0.632926	0.693568	-0.370301	0.392595	-0.762896		-3	-1	0	3	1	2	1	0	-1	0	-3	-2	-3	1	0	-2	23	1	-1	0	0	0	0	0	0	1	1
PF02537	CRCB	CrcB-like protein, Camphor Resistance (CrcB)	2	5	49	57	3	4	4	6	44	49	0.740132	0.861244	4.05333	4.64444	0.297362	0.0970611	-0.232442	-0.121831	-0.110611		-1	-1	-1	2	0	0	0	0	0	0	0	0	0	1	-1	0	-1	0	0	1	0	0	1	0	-1	1	0
PF02538	Hydantoinase_B	Hydantoinase B/oxoprolinase	1	3	38	39	1	2	2	2	35	35	0.320057	0.640114	3.12444	3.12444	1.57391	0.439915	-0.678526	-0.294852	-0.383674		-1	-1	0	0	0	0	0	0	0	0	1	0	0	0	0	0	0	-1	0	0	-1	3	1	0	0	-1	0
PF02540	NAD_synthase	NAD synthase	4	2	50	52	1	6	6	4	46	40	0.227733	1.61483	4.39111	3.71556	2.85542	1.5173	-1.04064	0.661488	-1.70213		0	0	0	2	1	0	0	1	0	0	0	0	0	0	0	-1	-1	0	1	4	0	-1	1	-1	0	0	1
PF02541	Ppx-GppA	Ppx/GppA phosphatase family	0	4	17	47	1	3	1	5	15	42	0.740132	0.755879	1.35111	3.96889	0.0991205	0.25692	-0.12327	-0.213075	0.0898055		-1	0	0	-1	0	0	0	0	0	0	-1	0	0	0	0	0	-1	0	0	0	-1	0	0	-1	0	0	0
PF02542	YgbB	YgbB family	3	1	15	43	2	3	0	1	15	37	1.57895	0.934903	1.26667	3.20889	0.458742	0.0147527	0.302585	-0.0441553	0.346741		0	-2	0	0	0	0	0	0	0	0	1	0	1	0	0	0	1	0	0	-1	0	0	0	0	0	0	0
PF02543	Carbam_trans_N	Carbamoyltransferase N-terminus	2	3	29	45	2	4	2	3	25	40	0.877193	1.10159	2.28	3.63111	0.0373201	0.0406136	-0.0722116	0.075573	-0.147785		-1	0	0	-1	0	0	0	0	0	0	0	0	-1	1	0	0	7	0	0	0	0	0	0	0	0	0	0
PF02544	Steroid_dh	3-oxo-5-alpha-steroid 4-dehydrogenase	7	4	57	54	9	5	9	4	43	45	2.0496	1.20838	4.39111	4.13778	5.21271	0.194578	1.64932	0.181027	1.46829		0	0	-1	2	2	1	-1	0	-1	0	1	1	-1	1	0	0	1	0	0	0	-1	5	1	-2	0	0	0
PF02545	Maf	Maf-like protein	4	4	35	59	2	6	5	6	31	48	0.657895	1.31579	3.04	4.56	0.386728	0.492139	-0.272439	0.316076	-0.588515		0	0	-1	1	0	1	0	0	0	0	1	1	-1	0	-1	0	0	0	-1	0	-1	0	1	0	1	0	0
PF02547	Queuosine_synth	Queuosine biosynthesis protein	0	5	27	48	1	3	1	1	24	48	0.473684	0.725027	2.11111	4.13778	0.636475	0.339906	-0.371621	-0.251902	-0.119719		0	0	0	-1	0	0	0	0	0	0	-1	0	0	0	-1	0	-1	0	-1	0	-1	2	0	0	0	0	0
PF02548	Pantoate_transf	Ketopantoate hydroxymethyltransferase	3	0	31	32	0	1	2	1	29	27	0	0.422932	2.61778	2.36444	2.85922	0.857272	-1.04167	-0.45038	-0.591289		1	0	0	0	0	0	0	0	0	0	0	1	0	0	0	1	0	0	0	0	0	0	0	-1	0	0	1
PF02550	AcetylCoA_hydro	Acetyl-CoA hydrolase/transferase N-terminal domain	0	0	4	15	0	3	0	1	4	11	0	2.96053	0.337778	1.01333	0.368932	4.1771	-0.264731	1.38749	-1.65222		0	0	0	0	0	0	0	0	0	0	0	0	0	0	0	0	0	0	0	0	0	0	0	0	2	0	1
PF02551	Acyl_CoA_thio	Acyl-CoA thioesterase	1	2	9	23	1	2	0	1	7	21	1.69173	1.07656	0.591111	1.85778	0.305407	0.0118013	0.236188	0.0392949	0.196893		0	-1	0	2	0	0	0	0	0	0	-1	0	0	0	0	0	0	0	0	0	0	0	1	-1	0	0	0
PF02556	SecB	Preprotein translocase subunit SecB	0	0	0	0	0	0	0	0	0	0	0	0	0	0	0	0	FALSE	FALSE	FALSE		0	0	0	0	0	0	0	0	0	0	0	0	0	0	0	0	0	0	0	0	0	0	0	0	0	0	0
PF02557	VanY	D-alanyl-D-alanine carboxypeptidase	0	3	5	23	0	1	0	2	2	21	0	0.514874	0.168889	1.94222	0.184466	0.497344	-0.175508	-0.318154	0.142646		0	0	0	0	0	0	0	-1	0	0	0	-1	0	0	0	0	-1	0	0	0	0	0	0	0	0	0	0
PF02558	ApbA	Ketopantoate reductase PanE/ApbA	6	5	53	77	6	5	4	7	46	66	1.42105	0.811103	4.22222	6.16444	0.809578	0.238835	0.433863	-0.204086	0.637949		0	-3	-1	0	0	1	0	2	0	0	0	-1	2	1	0	-1	4	2	-2	0	0	4	0	-1	0	1	-1
PF02559	CarD_CdnL_TRCF	CarD-like/TRCF domain	0	3	19	31	0	3	5	5	13	26	0	1.14601	1.52	2.61778	1.66019	0.0604636	-0.704263	0.0937918	-0.798055		0	0	-1	0	0	0	0	0	0	0	-1	0	0	0	0	0	-1	0	0	0	0	0	0	0	0	0	0
PF02560	Cyanate_lyase	Cyanate lyase C-terminal domain	3	4	17	46	1	2	5	2	12	43	0.696594	0.526316	1.43556	3.8	0.143603	0.927632	-0.15198	-0.474335	0.322354		1	-1	0	0	1	-1	-1	0	0	1	0	-1	0	0	0	0	0	0	0	0	0	0	0	0	0	0	0
PF02561	FliS	Flagellar protein FliS	0	0	0	0	0	0	0	0	0	0	0	0	0	0	0	0	FALSE	FALSE	FALSE		0	0	0	0	0	0	0	0	0	0	0	0	0	0	0	0	0	0	0	0	0	0	0	0	0	0	0
PF02562	PhoH	PhoH-like protein	2	6	10	42	0	5	2	7	10	35	0	1.40977	1.01333	3.54667	1.1068	0.644147	-0.533459	0.374468	-0.907928		0	-1	0	4	-1	0	0	0	0	0	-1	0	-1	-1	-1	0	1	0	0	0	-1	1	1	0	0	0	0
PF02563	Poly_export	Polysaccharide biosynthesis/export protein	0	0	3	20	0	2	0	4	2	13	0	1.39319	0.168889	1.43556	0.184466	0.240072	-0.175508	0.204708	-0.380216		0	0	0	0	0	0	0	0	0	0	0	0	0	0	0	0	0	0	0	0	0	0	0	0	0	0	0
PF02566	OsmC	OsmC-like protein	5	5	19	68	2	2	1	4	20	62	1.12782	0.358852	1.77333	5.57333	0.0313929	2.49558	0.0658215	-0.942461	1.00828		-1	-1	0	0	1	1	0	0	0	0	1	-1	0	0	0	-1	1	1	-1	1	-1	-1	1	0	0	0	0
PF02567	PhzC-PhzF	Phenazine biosynthesis-like protein	3	4	48	55	1	6	0	5	46	47	0.257437	1.3664	3.88444	4.39111	2.33485	0.637777	-0.897885	0.372105	-1.26999		1	0	0	4	0	0	0	0	0	0	-1	0	-1	0	-1	1	-1	0	0	0	-1	1	1	-1	0	0	0
PF02568	ThiI	Thiamine biosynthesis protein (ThiI)	0	2	0	16	0	2	0	3	0	13	0	1.48026	0	1.35111	0	0.336928	FALSE	0.250567	FALSE		0	0	-1	0	0	0	0	0	0	0	0	0	0	0	0	0	-1	0	0	0	0	0	0	0	0	0	0
PF02569	Pantoate_ligase	Pantoate-beta-alanine ligase	1	0	31	35	0	1	4	1	25	30	0	0.382003	2.44889	2.61778	2.67476	1.08886	-0.991609	-0.527646	-0.463963		0	0	0	0	0	0	0	0	0	0	0	0	0	0	0	0	1	0	0	0	-1	0	1	-1	0	0	0
PF02572	CobA_CobO_BtuR	ATP:corrinoid adenosyltransferase BtuR/CobO/CobP	0	0	0	0	0	0	0	0	0	0	0	0	0	0	0	0	FALSE	FALSE	FALSE		0	0	0	0	0	0	0	0	0	0	0	0	0	0	0	0	0	0	0	0	0	0	0	0	0	0	0
PF02574	S-methyl_trans	Homocysteine S-methyltransferase	7	3	61	56	7	3	3	6	54	47	1.45429	0.670308	4.81333	4.47556	1.07418	0.528736	0.522873	-0.330554	0.853427		0	-2	3	2	1	-1	0	0	1	0	0	0	0	0	1	0	2	1	-1	0	-6	2	8	-5	0	0	0
PF02575	YbaB_DNA_bd	YbaB/EbfC DNA-binding family	2	2	22	42	4	1	2	2	16	37	2.63158	0.303644	1.52	3.29333	4.34663	1.74026	1.43083	-0.727912	2.15875		0	1	0	0	0	0	0	0	0	0	-1	0	0	1	-1	0	0	0	0	0	0	-1	-1	-2	0	-1	0
PF02576	DUF150	RimP N-terminal domain	2	4	12	50	3	3	0	3	11	45	3.22967	0.740132	0.928889	4.05333	4.94605	0.297362	1.58252	-0.232442	1.81497		-1	0	-1	0	-1	0	0	0	0	0	1	0	0	0	1	0	-1	0	0	0	0	0	0	0	0	-1	0
PF02577	DUF151	Domain of unknown function (DUF151)	0	0	9	9	1	1	0	1	8	6	1.48026	1.69173	0.675556	0.591111	0.168464	0.305407	0.166546	0.236188	-0.0696418		0	0	0	0	0	0	0	0	0	0	0	0	0	0	0	0	0	0	0	0	0	0	0	0	0	0	0
PF02578	Cu-oxidase_4	Multi-copper polyphenol oxidoreductase laccase	0	0	1	14	0	0	0	5	1	9	0	0	0.0844444	1.18222	0.092233	1.29126	-0.118411	-0.592073	0.473662		0	0	0	0	0	0	0	0	0	0	0	0	0	0	0	0	0	0	0	0	0	0	0	0	0	0	0
PF02580	Tyr_Deacylase	D-Tyr-tRNA(Tyr) deacylase	2	4	33	53	1	5	3	1	28	50	0.382003	1.16099	2.61778	4.30667	1.08886	0.12092	-0.527646	0.137845	-0.665491		-1	-1	0	0	0	0	0	0	0	0	-1	0	-1	0	0	0	4	2	0	1	0	3	1	-4	-1	0	-1
PF02581	TMP-TENI	Thiamine monophosphate synthase	7	4	38	61	2	5	4	3	37	56	0.577664	1.00357	3.46222	4.98222	0.671627	6.87906e-05	-0.384592	0.00288353	-0.387475		-1	0	-1	0	0	1	0	-1	0	1	-1	0	1	1	0	1	1	0	1	0	0	1	1	-1	0	0	0
PF02582	DUF155	Uncharacterised ACR, YagE family COG1723	5	1	43	59	9	4	5	2	31	49	2.96053	0.928793	3.04	4.30667	12.5313	0.0236921	3.39773	-0.0566683	3.4544		-1	0	0	0	0	0	0	0	0	0	3	0	1	1	0	0	1	0	1	0	-1	0	0	-3	-1	0	0
PF02585	PIG-L	GlcNAc-PI de-N-acetylase	3	0	19	63	2	2	1	6	16	52	1.39319	0.408348	1.43556	4.89778	0.240072	1.86687	0.204708	-0.76489	0.969598		0	0	1	0	1	0	0	0	0	0	0	0	0	0	0	0	1	0	0	0	0	0	4	-1	-1	0	-1
PF02586	SRAP	SOS response associated peptidase (SRAP)	1	1	21	61	5	3	0	6	15	51	3.94737	0.623269	1.26667	4.81333	11.7475	0.742722	3.21521	-0.410285	3.62549		0	-1	0	0	0	0	0	0	0	0	0	0	1	0	0	0	0	0	0	0	-1	0	0	-1	0	-1	0
PF02590	SPOUT_MTase	Predicted SPOUT methyltransferase	0	1	8	59	0	5	0	3	7	50	0	1.11718	0.591111	4.47556	0.645631	0.0665929	-0.375018	0.0988885	-0.473907		0	0	0	0	0	0	0	0	0	0	0	0	-1	0	0	0	0	0	0	0	-1	0	-1	0	0	0	0
PF02591	zf-RING_7	C4-type zinc ribbon domain	0	0	0	20	0	3	0	2	0	14	0	2.22039	0	1.35111	0	2.16635	FALSE	0.850593	FALSE		0	0	0	0	0	0	0	0	0	0	0	0	0	0	0	0	0	0	0	0	0	0	0	0	0	0	0
PF02592	Vut_1	Putative vitamin uptake transporter	0	0	3	21	0	1	0	5	3	15	0	0.592105	0.253333	1.68889	0.276699	0.305569	-0.222665	-0.236264	0.0135983		0	0	0	0	0	0	0	0	0	0	0	0	0	0	0	0	0	0	0	0	0	0	0	0	0	0	0
PF02594	DUF167	Uncharacterised ACR, YggU family COG1872	4	3	9	20	3	1	1	0	8	22	3.94737	0.538278	0.76	1.85778	7.04851	0.430857	2.10056	-0.291096	2.39165		-1	0	0	0	0	1	0	0	0	0	-1	-1	1	1	0	0	1	0	0	0	-1	-1	-1	-1	0	0	0
PF02595	Gly_kinase	Glycerate kinase family	0	0	1	2	0	0	0	1	1	1	0	0	0.0844444	0.168889	0.092233	0.184466	-0.118411	-0.175508	0.0570963		0	0	0	0	0	0	0	0	0	0	0	0	0	0	0	0	0	0	0	0	0	0	0	0	0	0	0
PF02596	DUF169	Uncharacterised ArCR, COG2043	0	0	0	4	0	1	0	0	0	2	0	5.92105	0	0.168889	0	4.33393	FALSE	1.42759	FALSE		0	0	0	0	0	0	0	0	0	0	0	0	0	0	0	0	0	0	0	0	0	0	0	0	0	0	0
PF02597	ThiS	ThiS family	1	7	11	67	0	5	1	4	10	62	0	0.897129	0.928889	5.57333	1.01456	0.0640034	-0.50333	-0.0967598	-0.40657		-1	-1	-1	0	0	0	0	0	-1	0	0	0	0	0	-1	0	-1	2	-1	-1	0	0	0	0	0	0	0
PF02598	Methyltrn_RNA_3	Putative RNA methyltransferase	0	5	16	42	0	8	2	2	13	37	0	2.42915	1.26667	3.29333	1.3835	7.23338	-0.620682	2.14533	-2.76601		0	0	0	0	0	0	0	-1	0	-1	-1	-1	-1	0	0	0	0	0	0	0	-1	0	0	-1	0	0	0
PF02599	CsrA	Global regulator protein family	0	0	0	0	0	0	0	0	0	0	0	0	0	0	0	0	FALSE	FALSE	FALSE		0	0	0	0	0	0	0	0	0	0	0	0	0	0	0	0	0	0	0	0	0	0	0	0	0	0	0
PF02601	Exonuc_VII_L	Exonuclease VII, large subunit	0	0	1	6	0	0	0	1	1	5	0	0	0.0844444	0.506667	0.092233	0.553398	-0.118411	-0.340148	0.221736		0	0	0	0	0	0	0	0	0	0	0	0	0	0	0	0	0	0	0	0	0	0	0	0	0	0	0
PF02602	HEM4	Uroporphyrinogen-III synthase HemD	3	0	33	42	2	1	7	3	26	36	0.717703	0.303644	2.78667	3.29333	0.241284	1.74026	-0.205317	-0.727912	0.522595		0	0	0	0	1	0	0	0	0	0	0	0	1	0	0	0	1	0	0	0	0	0	1	0	0	0	0
PF02604	PhdYeFM_antitox	Antitoxin Phd_YefM, type II toxin-antitoxin system	0	0	0	0	0	0	0	0	0	0	0	0	0	0	0	0	FALSE	FALSE	FALSE		0	0	0	0	0	0	0	0	0	0	0	0	0	0	0	0	0	0	0	0	0	0	0	0	0	0	0
PF02605	PsaL	Photosystem I reaction centre subunit XI	1	4	13	34	1	4	0	2	13	29	0.910931	1.52801	1.09778	2.61778	0.00944995	0.788832	-0.0350059	0.426602	-0.461608		-1	0	0	0	0	0	0	0	0	-1	-1	0	0	0	0	0	0	2	-1	0	0	0	3	-1	2	0	0
PF02606	LpxK	Tetraacyldisaccharide-1-P 4'-kinase	0	0	3	26	1	3	0	5	2	17	5.92105	1.61483	0.168889	1.85778	4.33393	0.758652	1.42759	0.415951	1.01164		0	0	0	0	0	0	0	0	0	0	0	0	0	0	0	0	0	0	0	0	0	0	0	0	0	0	0
PF02607	B12-binding_2	B12 binding domain	0	3	40	30	3	1	3	0	32	29	1.01504	0.408348	2.95556	2.44889	0.000724703	0.933433	0.00942883	-0.476289	0.485718		-1	0	0	-1	0	0	0	0	0	0	0	0	0	0	0	0	-1	0	0	0	-2	0	6	-1	0	0	0
PF02608	Bmp	ABC transporter substrate-binding protein PnrA-like	0	0	13	36	0	6	0	5	12	22	0	2.63158	1.01333	2.28	1.1068	6.51994	-0.533459	1.97195	-2.50541		0	0	0	0	0	0	0	0	0	0	0	0	0	0	0	0	0	0	0	0	0	0	0	0	6	0	0
PF02609	Exonuc_VII_S	Exonuclease VII small subunit	0	0	2	22	0	3	0	4	2	15	0	1.86981	0.168889	1.60444	0.184466	1.30935	-0.175508	0.597718	-0.773226		0	0	0	0	0	0	0	0	0	0	0	0	0	0	0	0	0	0	0	0	0	0	0	0	0	0	0
PF02614	UxaC	Glucuronate isomerase	0	0	4	8	0	1	0	1	4	6	0	1.69173	0.337778	0.591111	0.368932	0.305407	-0.264731	0.236188	-0.500919		0	0	0	0	0	0	0	0	0	0	0	0	0	0	0	0	0	0	0	0	0	0	0	0	0	0	0
PF02615	Ldh_2	Malate/L-lactate dehydrogenase	5	3	43	50	2	7	4	3	41	41	0.526316	1.88397	3.8	3.71556	0.927632	3.1315	-0.474335	1.11468	-1.58901		0	0	0	2	3	1	0	0	0	0	2	0	-1	0	-1	-1	4	0	0	0	-1	1	2	-2	0	0	-1
PF02616	SMC_ScpA	Segregation and condensation protein ScpA	0	0	1	27	0	2	0	4	1	21	0	0.947368	0.0844444	2.11111	0.092233	0.00634398	-0.118411	-0.0284847	-0.0899268		0	0	0	0	0	0	0	0	0	0	0	0	0	0	0	0	0	0	0	0	0	0	0	0	0	0	0
PF02617	ClpS	ATP-dependent Clp protease adaptor protein ClpS	5	4	44	47	7	1	6	1	36	44	1.97368	0.263158	3.54667	3.8	3.62482	2.24894	1.24471	-0.873849	2.11856		-2	0	-1	1	0	3	0	0	1	0	0	0	0	2	-1	0	-2	1	0	0	1	0	2	-1	-1	-2	0
PF02620	YceD	Large ribosomal RNA subunit accumulation protein YceD	0	6	11	43	0	7	1	5	10	36	0	2.02182	0.928889	3.46222	1.01456	3.896	-0.50333	1.31514	-1.81847		-1	0	-1	0	0	0	0	-1	0	0	-1	-1	0	0	0	0	-1	0	0	0	0	0	0	0	0	0	-1
PF02622	DUF179	Uncharacterized ACR, COG1678	6	6	66	72	5	9	8	4	56	60	0.925164	1.6653	5.40444	5.40444	0.0328389	2.58336	-0.0674254	0.966609	-1.03403		-1	0	-3	5	2	4	0	0	0	0	-2	-1	-5	1	-2	0	5	0	1	0	-9	14	6	-8	-2	-1	2
PF02626	CT_A_B	Carboxyltransferase domain, subdomain A and B	0	0	5	15	0	3	1	2	4	9	0	3.22967	0.422222	0.928889	0.461165	4.94605	-0.303574	1.58252	-1.8861		0	0	0	0	0	0	0	0	0	0	0	0	0	0	0	0	0	0	0	0	0	0	0	0	0	0	0
PF02627	CMD	Carboxymuconolactone decarboxylase family	1	5	11	49	0	3	1	8	11	41	0	0.725027	1.01333	4.13778	1.1068	0.339906	-0.533459	-0.251902	-0.281557		0	-1	0	0	0	2	0	0	-1	0	0	0	-1	0	0	0	-1	-1	0	0	0	0	1	0	0	0	0
PF02628	COX15-CtaA	Cytochrome oxidase assembly protein	0	2	40	21	0	2	4	2	33	17	0	1.24654	3.12444	1.60444	3.41262	0.105586	-1.1891	0.127712	-1.31681		0	0	-1	0	0	0	0	0	0	0	0	0	0	0	0	0	-1	0	0	0	-1	0	1	0	0	1	0
PF02629	CoA_binding	CoA binding domain	5	2	50	37	1	2	7	1	45	31	0.227733	0.740132	4.39111	2.70222	2.85542	0.198241	-1.04064	-0.183001	-0.857641		0	-2	0	0	1	1	0	0	0	0	1	0	0	0	0	0	2	-1	1	0	-3	3	4	-5	7	0	0
PF02630	SCO1-SenC	SCO1/SenC	2	0	31	29	3	3	4	0	25	24	1.22505	1.48026	2.44889	2.02667	0.134303	0.505392	0.146295	0.321354	-0.175059		0	0	0	1	1	0	0	0	0	0	0	0	0	0	0	0	0	0	0	0	0	0	0	-1	0	0	0
PF02631	RecX	RecX family	0	0	6	27	0	3	0	2	6	19	0	1.69173	0.506667	1.77333	0.553398	0.91622	-0.340148	0.47048	-0.810628		0	0	0	0	0	0	0	0	0	0	0	0	0	0	0	0	0	0	0	4	-1	1	-1	-2	0	0	0
PF02632	BioY	BioY family	0	0	1	35	0	4	0	5	1	26	0	1.52801	0.0844444	2.61778	0.092233	0.788832	-0.118411	0.426602	-0.545013		0	0	0	0	0	0	0	0	0	0	0	0	0	0	0	0	0	0	0	0	0	-1	-1	-1	0	0	0
PF02633	Creatininase	Creatinine amidohydrolase	1	4	4	23	0	3	1	0	4	21	0	1.69173	0.422222	1.77333	0.461165	0.91622	-0.303574	0.47048	-0.774054		0	-1	0	0	0	0	0	1	0	0	0	-1	-1	0	0	0	-1	0	0	0	0	0	0	0	0	0	0
PF02635	DrsE	DsrE/DsrF-like family	0	0	0	0	0	0	0	0	0	0	0	0	0	0	0	0	FALSE	FALSE	FALSE		0	0	0	0	0	0	0	0	0	0	0	0	0	0	0	0	0	0	0	0	0	0	0	0	0	0	0
PF02636	Methyltransf_28	Putative S-adenosyl-L-methionine-dependent methyltransferase	3	4	49	51	5	8	6	4	37	40	1.37699	2.15311	3.63111	3.71556	0.55829	5.32061	0.342036	1.67624	-1.3342		0	0	-1	1	2	0	0	0	0	0	0	0	-1	-1	0	0	0	1	-1	0	-2	1	1	0	0	0	0
PF02637	GatB_Yqey	GatB domain	1	3	21	33	1	2	1	2	19	30	0.592105	0.740132	1.68889	2.70222	0.305569	0.198241	-0.236264	-0.183001	-0.053263		0	0	0	0	1	0	0	0	0	0	-1	0	0	0	0	0	-1	-1	0	0	0	0	0	0	0	0	0
PF02638	GHL10	Glycosyl hydrolase-like 10	0	0	0	0	0	0	0	0	0	0	0	0	0	0	0	0	FALSE	FALSE	FALSE		0	0	0	0	0	0	0	0	0	0	0	0	0	0	0	0	0	0	0	0	0	0	0	0	0	0	0
PF02645	DegV	Uncharacterised protein, DegV family COG1307	0	0	0	9	0	2	0	0	0	7	0	3.38346	0	0.591111	0	3.59408	FALSE	1.23668	FALSE		0	0	0	0	0	0	0	0	0	0	0	0	0	0	0	0	0	0	0	0	0	0	0	0	0	0	0
PF02646	RmuC	RmuC family	0	0	3	20	0	2	0	4	2	14	0	1.31579	0.168889	1.52	0.184466	0.164046	-0.175508	0.164019	-0.339527		0	0	0	0	0	0	0	0	0	0	0	0	0	0	0	0	0	0	0	0	0	0	0	0	0	1	-1
PF02652	Lactate_perm	L-lactate permease	0	0	7	32	0	3	0	4	7	22	0	1.3664	0.591111	2.19556	0.645631	0.318889	-0.375018	0.242394	-0.617412		0	0	0	0	0	0	0	0	0	0	0	0	0	0	0	0	0	0	0	0	0	0	0	0	0	-1	0
PF02653	BPD_transp_2	Branched-chain amino acid transport system / permease component	0	0	3	15	0	2	0	4	3	9	0	1.82186	0.253333	1.09778	0.276699	0.800055	-0.222665	0.430536	-0.653201		0	0	0	0	0	0	0	0	0	0	0	0	0	0	0	0	0	0	0	0	0	0	0	0	0	0	0
PF02654	CobS	Cobalamin-5-phosphate synthase	0	6	10	52	0	5	3	8	7	45	0	1.11718	0.844444	4.47556	0.92233	0.0665929	-0.472546	0.0988885	-0.571434		0	0	-1	0	0	0	0	-1	0	0	-1	-1	0	0	0	0	-1	0	-1	0	-1	0	0	0	0	0	0
PF02655	ATP-grasp_3	ATP-grasp domain	6	8	53	67	3	6	4	1	50	62	0.657895	1.12782	4.56	5.32	0.580092	0.0941786	-0.350396	0.119798	-0.470194		0	-1	-2	8	3	3	0	0	1	-1	-2	0	-1	0	-1	-1	4	-1	1	0	-6	7	8	-6	0	-1	0
PF02656	DUF202	Domain of unknown function (DUF202)	6	7	56	55	4	7	6	2	49	49	0.861244	1.62539	4.64444	4.30667	0.0970611	1.81948	-0.121831	0.751106	-0.872938		0	-2	1	10	4	0	0	0	0	-1	-2	-1	-1	0	1	-1	4	-1	1	0	-1	1	3	-1	-1	0	1
PF02657	SufE	Fe-S metabolism associated domain	3	1	24	57	4	4	3	5	19	47	2.15311	0.910931	1.85778	4.39111	2.6603	0.0377998	0.987665	-0.0727088	1.06037		0	0	-1	0	0	0	0	0	0	0	1	0	1	0	0	0	0	1	0	0	-1	-1	0	-1	0	0	-1
PF02659	Mntp	Putative manganese efflux pump	0	0	0	0	0	0	0	0	0	0	0	0	0	0	0	0	FALSE	FALSE	FALSE		0	0	0	0	0	0	0	0	0	0	0	0	0	0	0	0	0	0	0	0	0	0	0	0	0	0	0
PF02661	Fic	Fic/DOC family	3	4	25	54	2	4	4	7	20	44	0.986842	0.928793	2.02667	4.30667	0.00038054	0.0236921	-0.00681238	-0.0566683	0.0498559		0	0	-1	0	2	0	0	0	-1	0	3	0	0	0	-1	-1	2	0	0	1	0	0	0	-1	0	0	2
PF02666	PS_Dcarbxylase	Phosphatidylserine decarboxylase	1	1	17	47	1	4	1	5	14	36	0.789474	1.15533	1.26667	3.46222	0.0609669	0.090494	-0.094218	0.117163	-0.211381		0	0	0	0	0	0	0	0	0	0	-1	0	0	0	0	0	4	0	0	0	-1	0	-1	0	-1	0	0
PF02668	TauD	Taurine catabolism dioxygenase TauD, TfdA family	6	8	169	25	11	3	15	3	140	26	0.840407	1.22505	13.0889	2.44889	0.361907	0.134303	-0.261656	0.146295	-0.407951		1	-6	1	28	0	0	-1	2	0	0	-4	-2	-5	-1	-1	0	20	2	-2	14	21	51	51	11	16	8	12
PF02670	DXP_reductoisom	1-deoxy-D-xylulose 5-phosphate reductoisomerase	1	1	22	21	2	2	1	2	19	15	1.18421	1.39319	1.68889	1.43556	0.0620753	0.240072	0.0951518	0.204708	-0.109556		0	0	1	0	0	0	0	0	0	0	0	0	0	0	0	0	-1	0	0	0	0	0	2	1	0	0	0
PF02671	PAH	Paired amphipathic helix repeat	5	4	51	52	4	5	8	6	42	43	0.947368	1.20838	4.22222	4.13778	0.012688	0.194578	-0.0408082	0.181027	-0.221835		3	0	-1	4	1	2	0	0	1	0	0	0	-1	-2	0	0	-2	0	0	0	-1	0	0	0	0	0	0
PF02672	CP12	CP12 domain	2	4	30	40	3	3	1	6	28	33	1.22505	0.910931	2.44889	3.29333	0.134303	0.0283498	0.146295	-0.0623372	0.208632		-1	0	0	0	-1	0	2	0	0	0	-1	0	0	0	0	0	-1	0	1	0	0	0	1	0	0	-1	1
PF02674	Colicin_V	Colicin V production protein	0	0	0	0	0	0	0	0	0	0	0	0	0	0	0	0	FALSE	FALSE	FALSE		0	0	0	0	0	0	0	0	0	0	0	0	0	0	0	0	0	0	0	0	0	0	0	0	0	0	0
PF02675	AdoMet_dc	S-adenosylmethionine decarboxylase	2	6	31	58	1	6	5	3	26	53	0.382003	1.2688	2.61778	4.72889	1.08886	0.369883	-0.527646	0.265146	-0.792792		0	-1	0	0	1	0	0	0	-1	0	0	0	-1	0	-1	0	-1	-1	1	0	-1	0	2	0	0	3	0
PF02676	TYW3	Methyltransferase TYW3	1	4	37	58	1	7	1	4	34	49	0.338346	1.56405	2.95556	4.47556	1.40963	1.53869	-0.628715	0.66794	-1.29665		0	-1	0	0	0	0	0	0	0	0	-2	-1	-1	0	0	0	1	0	0	0	-1	2	1	-1	0	-1	1
PF02677	QueH	Epoxyqueuosine reductase QueH	0	3	12	30	0	4	2	1	8	27	0	1.69173	0.844444	2.36444	0.92233	1.22163	-0.472546	0.57018	-1.04273		0	0	0	0	0	0	0	0	0	0	-1	0	0	0	-1	0	-1	0	0	0	0	0	0	0	0	0	-1
PF02678	Pirin	Pirin	6	2	59	62	4	3	8	6	51	50	0.802855	0.634398	4.98222	4.72889	0.210269	0.687161	-0.189394	-0.390265	0.200871		0	0	0	0	0	1	0	2	-1	0	1	0	0	0	2	-2	2	0	1	0	-1	1	2	-2	2	0	3
PF02681	DUF212	Divergent PAP2 family	0	0	7	21	1	2	0	1	6	17	1.97368	1.31579	0.506667	1.52	0.517832	0.164046	0.326272	0.164019	0.162252		0	0	0	0	0	0	0	0	0	0	0	0	0	0	0	0	0	0	0	0	0	0	2	0	0	0	0
PF02682	CT_C_D	Carboxyltransferase domain, subdomain C and D	0	0	2	13	0	3	0	1	2	8	0	3.94737	0.168889	0.76	0.184466	7.04851	-0.175508	2.10056	-2.27606		0	0	0	0	0	0	0	0	0	0	0	0	0	0	0	0	0	0	0	0	0	0	0	0	0	0	0
PF02683	DsbD	Cytochrome C biogenesis protein transmembrane region	1	2	21	48	3	4	2	2	17	40	1.86981	1.12782	1.60444	3.54667	1.30935	0.0627857	0.597718	0.0957466	0.501972		0	-1	1	0	0	0	0	0	0	0	0	0	-1	0	0	0	0	0	0	0	-1	1	0	0	0	-1	0
PF02684	LpxB	Lipid-A-disaccharide synthetase	0	0	4	17	0	0	0	1	4	14	0	0	0.337778	1.26667	0.368932	1.3835	-0.264731	-0.620682	0.355951		0	0	0	0	0	0	0	0	0	0	0	0	0	0	0	0	0	0	0	0	0	0	0	0	0	0	0
PF02685	Glucokinase	Glucokinase	2	5	36	37	1	7	3	1	31	29	0.348297	2.76316	2.87111	2.53333	1.32838	8.45429	-0.603637	2.43868	-3.04232		1	0	0	4	0	0	0	0	0	0	-1	0	-1	-1	-1	0	0	-1	0	0	-1	0	0	-2	1	-1	0
PF02686	Glu-tRNAGln	Glu-tRNAGln amidotransferase C subunit	1	3	6	19	0	3	0	4	6	14	0	1.97368	0.506667	1.52	0.553398	1.5535	-0.340148	0.672396	-1.01254		0	0	0	0	0	0	0	0	0	1	-1	-1	0	0	0	0	-1	0	0	0	0	0	0	0	0	0	0
PF02687	FtsX	FtsX-like permease family	0	0	6	11	0	1	0	1	5	8	0	1.31579	0.422222	0.76	0.461165	0.0820232	-0.303574	0.110937	-0.414511		0	0	0	0	0	0	0	0	0	0	0	0	0	0	0	0	0	0	0	0	0	0	1	0	0	0	0
PF02689	Herpes_Helicase	Helicase	0	3	12	53	2	4	1	5	7	43	2.96053	0.986842	0.675556	4.05333	2.78473	0.00076108	1.02152	-0.00966513	1.03118		-1	0	0	0	0	0	0	0	0	0	0	0	-1	0	0	0	-1	0	0	0	-1	0	-1	0	1	0	-1
PF02690	Na_Pi_cotrans	Na+/Pi-cotransporter	4	3	38	35	2	4	3	2	34	32	0.640114	1.39319	3.12444	2.87111	0.439915	0.480144	-0.294852	0.311263	-0.606115		0	0	-1	0	0	0	0	2	0	0	-1	-1	0	0	4	0	9	0	1	3	-5	4	0	-6	-2	-1	7
PF02694	UPF0060	Uncharacterised BCR, YnfA/UPF0060 family	1	6	4	64	0	7	0	6	5	56	0	1.33701	0.422222	5.23556	0.461165	0.643463	-0.303574	0.374215	-0.677789		-1	-1	-1	4	0	0	0	0	0	0	-1	0	-1	0	0	0	-1	0	0	0	0	-1	0	3	0	0	-1
PF02696	UPF0061	Uncharacterized ACR, YdiU/UPF0061 family	2	3	52	47	3	6	4	2	43	39	0.755879	1.73299	3.96889	3.46222	0.25692	2.00809	-0.213075	0.805591	-1.01867		0	0	0	3	0	0	0	0	0	-1	0	0	-1	0	0	-1	2	0	0	0	-2	3	2	-1	0	0	0
PF02698	DUF218	DUF218 domain	5	2	46	64	4	5	4	3	40	54	1.07656	1.03878	3.71556	4.81333	0.0236027	0.00784846	0.0565548	0.0317943	0.0247606		0	-1	-1	4	0	2	1	0	0	0	0	0	0	1	0	0	4	0	0	2	2	0	0	-3	-2	0	-1
PF02701	zf-Dof	Dof domain, zinc finger	0	0	2	12	0	0	0	0	2	11	0	0	0.168889	0.928889	0.184466	1.01456	-0.175508	-0.50333	0.327823		0	0	0	0	0	0	0	0	0	0	0	0	0	0	0	0	0	0	0	0	0	0	0	0	0	0	0
PF02703	Adeno_E1A	Early E1A protein	0	0	0	0	0	0	0	0	0	0	0	0	0	0	0	0	FALSE	FALSE	FALSE		0	0	0	0	0	0	0	0	0	0	0	0	0	0	0	0	0	0	0	0	0	0	0	0	0	0	0
PF02705	K_trans	K+ potassium transporter	2	1	10	15	2	0	0	1	9	13	2.63158	0	0.76	1.18222	2.17331	1.29126	0.852561	-0.592073	1.44463		0	-2	0	1	0	0	0	0	0	0	0	0	1	0	0	0	0	0	0	1	-1	2	0	-1	0	0	0
PF02706	Wzz	Chain length determinant protein	0	0	1	8	0	1	0	1	1	6	0	1.69173	0.0844444	0.591111	0.092233	0.305407	-0.118411	0.236188	-0.3546		0	0	0	0	0	0	0	0	0	0	0	0	0	0	0	0	0	0	0	0	0	0	0	0	0	0	0
PF02709	Glyco_transf_7C	N-terminal domain of galactosyltransferase	3	5	43	60	1	7	3	3	38	53	0.288832	1.48026	3.46222	4.72889	1.90837	1.17925	-0.776908	0.556722	-1.33363		0	0	0	3	-1	0	0	0	-2	3	-1	0	-1	0	-1	0	6	0	0	0	-4	6	1	-12	5	0	1
PF02713	DUF220	Domain of unknown function DUF220	0	0	0	6	0	1	0	1	0	4	0	2.36842	0	0.422222	0	0.850493	FALSE	0.448046	FALSE		0	0	0	0	0	0	0	0	0	0	0	0	0	0	0	0	0	0	0	0	0	0	0	0	0	0	0
PF02714	RSN1_7TM	Calcium-dependent channel, 7TM region, putative phosphate	5	7	162	38	9	7	15	5	135	32	0.710526	2.2404	12.6667	3.12444	1.15328	5.17469	-0.548423	1.63982	-2.18824		-1	0	-2	3	1	0	2	0	0	0	-1	-1	-1	2	-1	0	9	0	-1	26	17	33	41	1	20	7	14
PF02716	0	0	0	0	0	0	0	0	0	0	0	0	0	0	0	0	0	0	FALSE	FALSE	FALSE		0	0	0	0	0	0	0	0	0	0	0	0	0	0	0	0	0	0	0	0	0	0	0	0	0	0	0
PF02719	Polysacc_synt_2	Polysaccharide biosynthesis protein	5	6	176	28	13	3	14	1	145	28	0.968222	1.22505	13.4267	2.44889	0.0147064	0.134303	-0.0440829	0.146295	-0.190378		0	-2	-3	8	0	4	0	-1	3	-3	0	4	-4	0	1	0	-5	0	0	13	9	12	34	4	14	10	8
PF02721	DUF223	Domain of unknown function DUF223	0	0	1	10	0	1	0	0	1	9	0	1.31579	0.0844444	0.76	0.092233	0.0820232	-0.118411	0.110937	-0.229349		0	0	0	0	0	0	0	0	0	0	0	0	0	0	0	0	0	0	0	0	0	0	0	0	0	0	0
PF02724	CDC45	CDC45-like protein	1	0	41	53	2	3	7	4	30	42	0.640114	0.772311	3.12444	3.88444	0.439915	0.218717	-0.294852	-0.193807	-0.101045		0	0	0	0	0	0	0	0	0	0	0	0	0	0	0	0	1	0	0	1	0	0	1	0	0	0	2
PF02727	Cu_amine_oxidN2	Copper amine oxidase, N2 domain	0	3	4	46	0	4	0	6	4	37	0	1.10159	0.337778	3.63111	0.368932	0.0406136	-0.264731	0.075573	-0.340304		0	0	0	0	0	0	0	0	0	0	-1	-1	0	0	0	0	-1	0	0	0	0	0	-1	0	0	0	0
PF02728	Cu_amine_oxidN3	Copper amine oxidase, N3 domain	0	5	7	47	0	5	1	6	6	38	0	1.34569	0.591111	3.71556	0.645631	0.480456	-0.375018	0.311388	-0.686406		0	0	0	0	-1	0	0	0	0	0	-1	-1	0	0	-1	0	-1	0	0	0	1	0	0	0	0	0	0
PF02729	OTCace_N	Aspartate/ornithine carbamoyltransferase, carbamoyl-P binding domain	3	4	43	46	1	4	5	0	39	42	0.269139	1.12782	3.71556	3.54667	2.16331	0.0627857	-0.849736	0.0957466	-0.945483		0	-1	-1	0	0	0	0	0	1	-1	0	0	1	0	0	0	0	1	-1	0	-1	5	1	-2	0	-1	0
PF02731	SKIP_SNW	SKIP/SNW domain	0	0	24	27	0	3	3	2	18	20	0	1.61483	1.77333	1.85778	1.93689	0.758652	-0.78514	0.415951	-1.20109		0	0	0	0	0	0	0	0	0	0	0	0	0	0	0	0	0	0	0	1	0	0	1	0	2	0	0
PF02732	ERCC4	ERCC4 domain	3	5	13	66	1	7	2	2	13	58	0.789474	1.38158	1.26667	5.06667	0.0609669	0.798071	-0.094218	0.429842	-0.52406		-1	0	-2	0	2	0	0	0	0	0	-1	0	0	1	-1	0	-2	1	0	0	-1	0	0	-1	0	-1	0
PF02733	Dak1	Dak1 domain	2	0	37	52	0	5	2	2	34	40	0	1.40977	3.04	3.54667	3.32039	0.644147	-1.16478	0.374468	-1.53925		0	0	0	0	0	0	0	0	0	0	0	0	0	0	0	1	2	0	0	0	-1	0	1	0	0	0	0
PF02734	Dak2	DAK2 domain	2	1	36	50	0	6	6	2	31	40	0	1.69173	3.12444	3.54667	3.41262	1.83244	-1.1891	0.754883	-1.94398		0	0	0	-1	1	0	0	0	0	0	0	0	0	0	0	0	1	0	0	0	-1	0	0	0	0	0	0
PF02735	Ku	Ku70/Ku80 beta-barrel domain	2	3	44	59	3	5	3	5	39	47	0.845865	1.13866	3.54667	4.39111	0.0914698	0.0914782	-0.117864	0.11787	-0.235735		1	0	0	0	0	0	0	0	-1	0	-1	0	-1	0	0	0	1	0	0	0	-2	0	0	-1	0	0	1
PF02736	Myosin_N	Myosin N-terminal SH3-like domain	2	5	9	42	0	6	1	5	10	34	0	1.82186	0.928889	3.29333	1.01456	2.40016	-0.50333	0.916058	-1.41939		1	0	-1	0	0	0	0	0	0	-1	-1	-1	-1	0	0	0	1	0	0	-1	-1	-1	0	0	0	0	0
PF02737	3HCDH_N	3-hydroxyacyl-CoA dehydrogenase, NAD binding domain	5	2	67	58	4	6	5	4	59	48	0.740132	1.3664	5.40444	4.39111	0.396482	0.637777	-0.276617	0.372105	-0.648722		0	-1	2	5	2	0	0	0	0	0	1	0	-3	0	0	0	4	0	0	2	-4	1	7	-4	0	0	3
PF02738	Ald_Xan_dh_C2	Molybdopterin-binding domain of aldehyde dehydrogenase	4	3	50	50	2	6	1	5	46	41	0.503919	1.54462	3.96889	3.88444	1.06281	1.2452	-0.519168	0.57762	-1.09679		0	0	-1	6	0	0	-1	0	1	0	1	-1	0	0	0	0	3	0	0	3	3	0	3	-3	0	0	1
PF02739	5_3_exonuc_N	5'-3' exonuclease, N-terminal resolvase-like domain	0	3	32	59	3	5	3	7	24	46	1.31579	1.11718	2.28	4.47556	0.24607	0.0665929	0.207709	0.0988885	0.108821		-1	0	-1	0	0	0	0	0	0	0	0	0	-1	0	0	0	0	0	0	0	-2	1	1	-1	0	0	0
PF02743	dCache_1	Cache domain	0	4	15	44	0	7	1	4	13	36	0	2.07237	1.18222	3.37778	1.29126	4.18513	-0.592073	1.38955	-1.98163		0	0	0	0	0	-1	0	0	0	0	-1	0	0	-1	0	0	-1	0	0	0	-1	0	1	0	0	1	0
PF02746	MR_MLE_N	Mandelate racemase / muconate lactonizing enzyme, N-terminal domain	3	3	18	50	0	7	1	6	17	39	0	1.84211	1.52	3.8	1.66019	2.90718	-0.704263	1.0546	-1.75887		2	0	0	1	0	0	0	0	0	0	0	0	-1	-1	-1	0	2	0	0	0	0	0	0	0	0	0	0
PF02747	PCNA_C	Proliferating cell nuclear antigen, C-terminal domain	5	1	27	27	4	2	1	0	26	21	1.75439	1.12782	2.28	1.77333	1.40055	0.0313929	0.625928	0.0658215	0.560107		0	-1	1	0	1	0	1	0	0	0	0	0	1	0	0	0	3	0	0	-2	-1	-1	7	3	0	0	0
PF02748	PyrI_C	Aspartate carbamoyltransferase regulatory chain, metal binding domain	0	0	0	0	0	0	0	0	0	0	0	0	0	0	0	0	FALSE	FALSE	FALSE		0	0	0	0	0	0	0	0	0	0	0	0	0	0	0	0	0	0	0	0	0	0	0	0	0	0	0
PF02749	QRPTase_N	Quinolinate phosphoribosyl transferase, N-terminal domain	1	0	22	39	1	2	0	1	20	33	0.592105	0.696594	1.68889	2.87111	0.305569	0.287205	-0.236264	-0.227666	-0.00859771		0	0	0	0	0	0	0	0	0	0	1	0	0	0	0	0	0	0	0	0	0	0	1	0	0	-1	0
PF02750	Synapsin_C	Synapsin, ATP binding domain	0	0	7	20	0	2	1	2	6	14	0	1.48026	0.591111	1.35111	0.645631	0.336928	-0.375018	0.250567	-0.625585		0	0	0	0	0	0	0	0	0	0	0	0	0	0	0	0	0	0	0	0	0	0	0	-1	0	0	0
PF02751	TFIIA_gamma_C	Transcription initiation factor IIA, gamma subunit	0	0	3	16	0	2	0	3	3	10	0	1.82186	0.253333	1.09778	0.276699	0.800055	-0.222665	0.430536	-0.653201		0	0	0	0	0	0	0	0	0	0	0	0	0	0	0	0	0	0	0	0	0	0	0	0	0	0	0
PF02752	Arrestin_C	Arrestin (or S-antigen), C-terminal domain	0	0	27	48	4	1	3	5	19	39	2.15311	0.269139	1.85778	3.71556	2.6603	2.16331	0.987665	-0.849736	1.8374		0	0	0	0	0	0	0	0	0	0	0	0	0	0	0	0	0	0	0	0	0	0	0	0	0	2	0
PF02753	PapD_C	Pili assembly chaperone PapD, C-terminal domain	0	0	0	0	0	0	0	0	0	0	0	0	0	0	0	0	FALSE	FALSE	FALSE		0	0	0	0	0	0	0	0	0	0	0	0	0	0	0	0	0	0	0	0	0	0	0	0	0	0	0
PF02754	CCG	Cysteine-rich domain	0	0	4	16	0	2	0	1	4	13	0	1.69173	0.337778	1.18222	0.368932	0.610813	-0.264731	0.362028	-0.626759		0	0	0	0	0	0	0	0	0	0	0	0	0	0	0	0	0	0	0	0	0	0	0	0	0	0	0
PF02755	RPEL	RPEL repeat	0	0	5	19	0	0	1	0	3	19	0	0	0.337778	1.60444	0.368932	1.75243	-0.264731	-0.731488	0.466757		0	0	0	0	0	0	0	0	0	0	0	0	0	0	0	0	0	0	0	0	0	0	0	0	0	0	0
PF02757	YLP	YLP motif	0	0	0	0	0	0	0	0	0	0	0	0	0	0	0	0	FALSE	FALSE	FALSE		0	0	0	0	0	0	0	0	0	0	0	0	0	0	0	0	0	0	0	0	0	0	0	0	0	0	0
PF02759	RUN	RUN domain	2	6	13	33	1	4	1	2	13	31	0.845865	1.43541	1.18222	2.78667	0.0304899	0.571323	-0.0648036	0.347045	-0.411848		0	-1	-1	1	0	0	-1	0	1	0	-1	-1	0	0	0	0	-1	0	0	0	0	0	0	0	0	0	0
PF02761	Cbl_N2	CBL proto-oncogene N-terminus, EF hand-like domain	0	0	1	8	0	0	0	2	1	6	0	0	0.0844444	0.675556	0.092233	0.737864	-0.118411	-0.40855	0.290139		0	0	0	0	0	0	0	0	0	0	0	0	0	0	0	0	0	0	0	0	0	0	0	0	0	0	0
PF02765	POT1	Telomeric single stranded DNA binding POT1/CDC13	1	4	13	51	1	4	3	3	8	45	1.07656	0.986842	0.928889	4.05333	0.00590067	0.00076108	0.0274408	-0.00966513	0.0371059		0	0	-1	0	0	0	0	0	-1	0	1	0	0	0	0	0	-1	-1	0	0	0	0	0	0	0	0	0
PF02767	DNA_pol3_beta_2	DNA polymerase III beta subunit, central domain	0	0	0	0	0	0	0	0	0	0	0	0	0	0	0	0	FALSE	FALSE	FALSE		0	0	0	0	0	0	0	0	0	0	0	0	0	0	0	0	0	0	0	0	0	0	0	0	0	0	0
PF02768	DNA_pol3_beta_3	DNA polymerase III beta subunit, C-terminal domain	0	0	2	11	0	1	0	4	2	6	0	1.18421	0.168889	0.844444	0.184466	0.0310377	-0.175508	0.0654226	-0.24093		0	0	0	0	0	0	0	0	0	0	0	0	0	0	0	0	0	0	0	0	0	0	0	0	0	0	0
PF02769	AIRS_C	AIR synthase related protein, C-terminal domain	3	3	60	60	1	5	5	3	55	51	0.197368	1.09649	5.06667	4.56	3.5597	0.0460123	-1.22769	0.0808417	-1.30853		0	0	-2	0	0	1	0	0	0	1	-1	1	0	0	0	0	-1	0	0	1	-5	0	1	-6	2	0	0
PF02770	Acyl-CoA_dh_M	Acyl-CoA dehydrogenase, middle domain	5	6	172	27	12	3	15	0	141	29	0.910931	1.22505	13.1733	2.44889	0.113399	0.134303	-0.132941	0.146295	-0.279236		3	0	0	4	0	-1	0	-1	0	0	1	0	-3	-2	-1	0	8	-1	1	37	23	45	41	8	13	5	4
PF02771	Acyl-CoA_dh_N	Acyl-CoA dehydrogenase, N-terminal domain	6	4	169	27	13	2	15	2	138	26	1.00619	0.845865	12.92	2.36444	0.000537164	0.0609799	0.00810561	-0.094229	0.102335		2	0	1	4	0	0	0	0	0	-1	1	0	-3	-1	0	1	6	-1	0	24	17	35	34	8	10	4	5
PF02772	S-AdoMet_synt_M	S-adenosylmethionine synthetase, central domain	3	3	41	41	3	3	2	3	37	35	0.910931	0.934903	3.29333	3.20889	0.0283498	0.0147527	-0.0623372	-0.0441553	-0.0181819		2	0	0	-1	0	0	0	0	0	0	0	1	0	-1	-2	0	6	0	0	1	-2	-1	9	-1	0	0	-1
PF02773	S-AdoMet_synt_C	S-adenosylmethionine synthetase, C-terminal domain	4	2	41	33	3	4	2	2	38	28	0.888158	1.57895	3.37778	2.53333	0.0458534	0.917484	-0.0806904	0.470908	-0.551599		2	0	0	1	0	0	0	0	0	0	0	1	0	-1	-2	0	6	0	0	-1	0	-4	6	3	0	0	-1
PF02774	Semialdhyde_dhC	Semialdehyde dehydrogenase, dimerisation domain	4	1	46	30	5	2	3	2	40	22	1.37699	0.986842	3.63111	2.02667	0.55829	0.00038054	0.342036	-0.00681238	0.348849		0	-1	1	0	0	0	0	0	0	0	1	0	1	0	0	0	0	1	0	0	-3	19	3	-5	0	-1	1
PF02775	TPP_enzyme_C	Thiamine pyrophosphate enzyme, C-terminal TPP binding domain	7	7	60	67	3	10	7	4	55	57	0.573005	1.94133	5.23556	5.15111	1.03819	4.92145	-0.511108	1.57634	-2.08745		-1	-1	-1	5	0	1	0	1	0	-1	-1	0	-1	1	0	1	10	-1	2	0	-5	14	11	-8	-1	0	4
PF02776	TPP_enzyme_N	Thiamine pyrophosphate enzyme, N-terminal TPP binding domain	6	6	55	58	2	4	8	2	48	55	0.422932	0.831025	4.72889	4.81333	1.71454	0.149207	-0.72034	-0.15534	-0.565001		-1	-4	0	2	1	-1	0	0	1	0	-1	-1	1	0	0	0	6	-1	1	0	-4	3	15	-4	0	0	4
PF02777	Sod_Fe_C	Iron/manganese superoxide dismutases, C-terminal domain	3	1	45	52	5	4	3	3	39	41	1.40977	1.07656	3.54667	3.71556	0.644147	0.0236027	0.374468	0.0565548	0.317913		0	-1	0	0	0	0	0	0	0	1	0	0	1	0	0	0	1	0	0	-2	-1	1	0	0	0	-1	1
PF02778	tRNA_int_endo_N	tRNA intron endonuclease, N-terminal domain	0	0	1	14	0	2	0	1	1	11	0	1.97368	0.0844444	1.01333	0.092233	1.03566	-0.118411	0.510278	-0.628689		0	0	0	0	0	0	0	0	0	0	0	0	0	0	0	0	0	0	0	0	0	0	0	0	0	0	0
PF02779	Transket_pyr	Transketolase, pyrimidine binding domain	5	5	173	20	12	3	15	0	142	20	0.905129	1.77632	13.2578	1.68889	0.129484	1.0985	-0.143291	0.530774	-0.674064		0	-1	-4	2	0	4	0	0	0	0	0	0	-1	0	-1	1	3	-1	1	15	11	19	31	5	11	6	8
PF02780	Transketolase_C	Transketolase, C-terminal domain	6	5	62	71	2	7	4	5	62	59	0.358852	1.29523	5.57333	5.40444	2.49558	0.509867	-0.942461	0.323127	-1.26559		0	-2	-2	1	0	3	0	0	0	1	0	1	0	0	-1	1	-1	-1	2	0	-1	3	12	-4	0	0	4
PF02781	G6PD_C	Glucose-6-phosphate dehydrogenase, C-terminal domain	4	5	46	46	2	10	5	3	40	37	0.526316	2.96053	3.8	3.37778	0.927632	13.9237	-0.474335	3.72036	-4.1947		1	0	1	2	0	-2	0	0	0	0	-2	-1	-1	-1	0	1	0	0	0	0	0	0	2	-1	0	0	1
PF02782	FGGY_C	FGGY family of carbohydrate kinases, C-terminal domain	5	4	70	72	6	7	7	5	58	60	1.09312	1.2753	5.48889	5.48889	0.051581	0.450346	0.0860089	0.299149	-0.21314		0	0	-1	1	0	0	0	0	0	1	-1	0	0	1	0	2	-1	1	-1	1	-1	1	4	-3	1	0	0
PF02784	Orn_Arg_deC_N	Pyridoxal-dependent decarboxylase, pyridoxal binding domain	5	3	53	50	3	1	7	1	45	49	0.683198	0.236842	4.39111	4.22222	0.478944	2.68102	-0.310779	-0.993318	0.682539		0	0	0	1	2	1	1	0	0	0	0	0	-1	1	0	0	-1	0	-1	0	-2	1	2	-3	0	3	-1
PF02785	Biotin_carb_C	Biotin carboxylase C-terminal domain	4	3	71	72	3	6	6	9	63	55	0.514874	1.1102	5.82667	5.40444	1.49203	0.0711195	-0.65384	0.10253	-0.756371		1	4	0	0	0	0	0	0	-1	0	-1	0	-1	0	0	0	1	0	1	-1	-4	1	6	0	2	0	1
PF02786	CPSase_L_D2	Carbamoyl-phosphate synthase L chain, ATP binding domain	5	9	169	32	11	3	15	3	139	33	0.845865	0.986842	13.0044	3.04	0.335389	0.00057081	-0.249875	-0.00835797	-0.241517		1	-1	0	2	0	0	-1	0	-1	1	-2	-1	-2	-1	-1	0	3	-2	2	18	6	34	46	6	10	8	10
PF02787	CPSase_L_D3	Carbamoyl-phosphate synthetase large chain, oligomerisation domain	2	1	41	49	2	3	4	1	36	42	0.592105	0.826193	3.37778	3.63111	0.611138	0.119092	-0.362151	-0.136664	-0.225486		0	0	-1	0	0	1	0	0	0	0	0	0	0	0	0	0	2	0	0	0	-8	10	6	-6	0	0	0
PF02788	RuBisCO_large_N	Ribulose bisphosphate carboxylase large chain, N-terminal domain	1	6	20	68	1	8	0	8	20	54	0.592105	1.52801	1.68889	5.23556	0.305569	1.57766	-0.236264	0.679651	-0.915915		0	0	0	0	-1	-1	0	0	0	-1	-1	0	0	0	-1	0	11	0	-1	5	-3	2	8	-6	1	0	0
PF02789	Peptidase_M17_N	Cytosol aminopeptidase family, N-terminal domain	3	4	30	30	1	3	2	1	28	28	0.394737	1.22505	2.53333	2.44889	1.01066	0.134303	-0.502042	0.146295	-0.648337		-1	0	-1	1	0	0	0	0	0	0	-1	0	0	0	1	0	1	0	-1	0	-1	0	0	0	1	0	1
PF02790	COX2_TM	Cytochrome C oxidase subunit II, transmembrane domain	0	0	3	21	0	3	0	4	3	14	0	1.97368	0.253333	1.52	0.276699	1.5535	-0.222665	0.672396	-0.895061		0	0	0	0	0	0	0	0	0	0	0	0	0	0	0	0	0	0	0	0	0	0	0	0	0	0	0
PF02791	DDT	DDT domain	4	6	22	48	1	4	5	9	20	39	0.473684	0.986842	2.11111	4.05333	0.636475	0.00076108	-0.371621	-0.00966513	-0.361956		0	1	-1	0	-1	1	1	-1	0	0	0	0	0	-1	-1	1	-1	0	0	0	0	0	0	0	0	0	0
PF02792	Mago_nashi	Mago nashi protein	3	1	20	52	4	4	3	2	15	44	2.63158	1.02975	1.52	3.88444	4.34663	0.00372714	1.43083	0.0216738	1.40916		0	0	0	0	1	0	0	0	0	0	0	0	1	0	0	0	1	-1	0	1	0	1	0	-2	0	0	-1
PF02793	HRM	Hormone receptor domain	0	0	0	6	0	2	0	0	0	4	0	5.92105	0	0.337778	0	8.66785	FALSE	2.48963	FALSE		0	0	0	0	0	0	0	0	0	0	0	0	0	0	0	0	0	0	0	0	0	0	0	0	0	0	0
PF02796	HTH_7	Helix-turn-helix domain of resolvase	0	0	2	3	0	0	0	1	2	2	0	0	0.168889	0.253333	0.184466	0.276699	-0.175508	-0.222665	0.0471575		0	0	0	0	0	0	0	0	0	0	0	0	0	0	0	0	0	0	0	0	0	0	0	0	0	0	0
PF02797	Chal_sti_synt_C	Chalcone and stilbene synthases, C-terminal domain	4	2	38	38	2	2	3	1	37	33	0.592105	0.696594	3.37778	2.87111	0.611138	0.287205	-0.362151	-0.227666	-0.134485		1	0	0	0	1	0	0	0	0	1	4	0	-1	0	0	0	0	-1	0	-1	0	-1	0	0	0	0	1
PF02798	GST_N	Glutathione S-transferase, N-terminal domain	7	9	174	31	13	4	16	2	143	32	0.968222	1.39319	13.4267	2.87111	0.0147064	0.480144	-0.0440829	0.311263	-0.355345		4	-6	-4	11	4	6	2	-2	0	-1	1	-2	-2	-2	-4	0	8	0	-1	37	39	48	61	9	26	4	8
PF02799	NMT_C	Myristoyl-CoA:protein N-myristoyltransferase, C-terminal domain	4	0	22	34	1	1	3	0	22	28	0.473684	0.422932	2.11111	2.36444	0.636475	0.857272	-0.371621	-0.45038	0.0787588		0	0	0	0	1	0	0	0	0	0	0	0	1	0	0	0	1	1	0	1	-1	0	1	-2	0	0	1
PF02800	Gp_dh_C	Glyceraldehyde 3-phosphate dehydrogenase, C-terminal domain	3	4	170	20	11	2	16	0	138	20	0.845865	1.18421	13.0044	1.68889	0.335389	0.0620753	-0.249875	0.0951518	-0.345027		0	0	-1	1	0	1	0	0	0	-1	-1	-1	0	0	0	0	8	0	0	22	17	52	58	12	14	6	10
PF02801	Ketoacyl-synt_C	Beta-ketoacyl synthase, C-terminal domain	5	7	126	50	9	7	11	3	102	46	0.943177	1.69173	9.54222	4.13778	0.0334253	2.13785	-0.0680671	0.842533	-0.9106		17	-1	0	5	0	0	2	-2	2	-2	-5	0	-5	-7	0	0	28	-1	0	124	84	120	160	59	49	1	1
PF02803	Thiolase_C	Thiolase, C-terminal domain	2	4	49	62	2	5	1	4	43	55	0.538278	1.00357	3.71556	4.98222	0.861714	6.87906e-05	-0.451906	0.00288353	-0.45479		0	-1	1	0	0	0	0	0	-1	0	0	0	0	-1	0	0	3	-1	0	7	0	-1	21	-9	0	1	0
PF02806	Alpha-amylase_C	Alpha amylase, C-terminal all-beta domain	3	0	26	30	1	3	1	1	26	22	0.438596	1.54462	2.28	1.94222	0.782298	0.622598	-0.424305	0.366447	-0.790752		0	0	0	0	0	0	1	0	0	0	1	0	0	0	0	0	5	0	0	0	-5	1	1	-5	1	0	0
PF02807	ATP-gua_PtransN	ATP:guanido phosphotransferase, N-terminal domain	6	1	40	55	8	3	5	4	30	47	2.70677	0.696594	2.95556	4.30667	9.24515	0.430808	2.62687	-0.291076	2.91794		0	0	1	0	1	0	0	0	0	0	2	0	-1	1	0	0	4	1	0	0	-4	6	9	-1	0	0	0
PF02809	UIM	Ubiquitin interaction motif	5	3	36	58	1	6	3	2	34	47	0.320057	1.45005	3.12444	4.13778	1.57391	0.906282	-0.678526	0.467115	-1.14564		1	0	1	4	0	0	0	0	0	0	0	-1	0	-1	0	0	3	1	-1	0	-1	0	0	-1	0	0	-1
PF02810	SEC-C	SEC-C motif	4	3	43	56	5	3	5	5	34	47	1.51822	0.683198	3.29333	4.39111	0.95598	0.478944	0.483859	-0.310779	0.794638		0	-1	0	2	-1	-1	0	1	0	0	0	0	0	0	0	1	2	0	0	0	-1	0	1	-1	0	-1	0
PF02811	PHP	PHP domain	0	0	3	23	0	1	0	5	3	16	0	0.56391	0.253333	1.77333	0.276699	0.36681	-0.222665	-0.263804	0.041139		0	0	0	0	0	0	0	0	0	0	0	0	0	0	0	0	0	0	0	0	-1	0	1	0	0	0	0
PF02812	ELFV_dehydrog_N	Glu/Leu/Phe/Val dehydrogenase, dimerisation domain	5	3	40	49	3	3	6	3	34	42	0.888158	0.789474	3.37778	3.8	0.0458534	0.182901	-0.0806904	-0.174644	0.0939535		1	-1	0	1	1	2	0	0	0	0	0	0	0	0	0	-1	-1	0	1	4	-1	-1	5	-1	0	0	0
PF02815	MIR	MIR domain	2	2	31	56	3	0	3	3	25	52	1.2688	0	2.36444	4.64444	0.184941	5.07282	0.17577	-1.61432	1.79009		0	0	0	0	0	3	0	0	1	0	0	0	0	0	-1	0	-1	0	0	0	0	0	0	0	0	0	-1
PF02816	Alpha_kinase	Alpha-kinase family	6	6	73	73	6	5	8	4	63	65	1.00074	0.858124	5.99556	5.82667	3.57282e-06	0.127309	0.000655477	-0.141921	0.142576		-1	2	0	0	7	6	0	0	0	0	5	-1	-1	0	-3	-2	15	3	-1	4	-7	0	4	-10	3	2	0
PF02817	E3_binding	e3 binding domain	5	5	48	61	4	6	2	5	44	51	1.02975	1.2688	3.88444	4.72889	0.00372714	0.369883	0.0216738	0.265146	-0.243472		0	-1	-1	2	0	1	0	0	0	0	2	0	-1	1	0	0	-3	-1	1	0	-1	0	1	0	0	-1	1
PF02820	MBT	mbt repeat	0	4	4	25	0	3	1	2	2	21	0	1.54462	0.253333	1.94222	0.276699	0.622598	-0.222665	0.366447	-0.589113		0	-1	0	0	0	0	0	0	0	0	-1	0	-1	0	0	0	-1	0	0	0	0	0	-1	0	0	0	0
PF02822	Antistasin	Antistasin family	0	0	1	3	0	0	1	1	0	2	0	0	0.0844444	0.253333	0.092233	0.276699	-0.118411	-0.222665	0.104254		0	0	0	0	0	0	0	0	0	0	0	0	0	0	0	0	0	0	0	0	0	0	0	0	0	0	0
PF02823	ATP-synt_DE_N	ATP synthase, Delta/Epsilon chain, beta-sandwich domain	4	3	37	46	1	5	5	2	35	37	0.296053	1.51822	3.37778	3.29333	1.82411	0.95598	-0.752457	0.483859	-1.23632		-1	-1	0	0	0	0	0	0	1	0	0	0	0	0	-1	1	3	1	0	1	-2	1	0	-6	-1	0	-1
PF02824	TGS	TGS domain	4	3	57	63	3	7	6	4	52	52	0.612523	1.48026	4.89778	4.72889	0.799542	1.17925	-0.430357	0.556722	-0.987079		1	0	0	3	0	0	0	0	-1	1	0	0	-1	-2	0	0	0	1	0	0	-1	1	2	-1	1	1	0
PF02825	WWE	WWE domain	6	3	94	15	3	2	8	2	84	13	0.386156	1.57895	7.76889	1.26667	3.18807	0.458742	-1.12973	0.302585	-1.43231		1	1	0	3	0	2	0	0	0	0	-2	0	-4	0	-1	1	38	0	0	20	16	43	40	7	38	0	3
PF02826	2-Hacid_dh_C	D-isomer specific 2-hydroxyacid dehydrogenase, NAD binding domain	7	8	172	30	11	5	15	3	144	28	0.819265	1.91002	13.4267	2.61778	0.476193	2.33786	-0.309669	0.898725	-1.20839		1	-2	-1	9	3	1	1	0	0	0	-3	-1	-4	-1	0	-1	15	-1	1	32	22	41	51	10	20	6	8
PF02831	gpW	gpW	0	0	0	0	0	0	0	0	0	0	0	0	0	0	0	0	FALSE	FALSE	FALSE		0	0	0	0	0	0	0	0	0	0	0	0	0	0	0	0	0	0	0	0	0	0	0	0	0	0	0
PF02833	DHHA2	DHHA2 domain	2	5	49	70	6	6	5	4	36	62	1.73299	1.07656	3.46222	5.57333	2.00809	0.035404	0.805591	0.0701972	0.735394		0	0	-1	0	0	0	0	0	0	0	1	0	-1	0	-1	-1	-1	0	1	1	0	4	1	-3	0	0	0
PF02834	LigT_PEase	LigT like Phosphoesterase	0	0	13	50	1	4	0	9	11	37	1.07656	1.02975	0.928889	3.88444	0.00590067	0.00372714	0.0274408	0.0216738	0.00576701		0	0	0	0	0	0	0	0	0	0	0	0	0	0	0	0	0	0	0	0	0	0	2	-1	0	0	0
PF02836	Glyco_hydro_2_C	Glycosyl hydrolases family 2, TIM barrel domain	4	3	48	70	3	9	4	6	42	54	0.772311	1.77632	3.88444	5.06667	0.218717	3.2955	-0.193807	1.1582	-1.35201		1	-1	0	7	0	0	0	0	0	0	0	0	-4	-1	0	1	8	0	0	5	-10	1	2	-13	0	0	0
PF02837	Glyco_hydro_2_N	Glycosyl hydrolases family 2, sugar binding domain	6	4	42	67	3	6	3	8	38	54	0.866496	1.14601	3.46222	5.23556	0.0669791	0.120927	-0.0992031	0.13785	-0.237053		1	0	0	4	-1	1	0	0	0	0	1	0	-3	-1	0	0	2	2	-1	0	-3	0	2	-3	1	0	0
PF02838	Glyco_hydro_20b	Glycosyl hydrolase family 20, domain 2	1	4	27	65	2	5	2	6	20	56	1.07656	0.955008	1.85778	5.23556	0.0118013	0.0114964	0.0392949	-0.0387623	0.0780572		0	0	-1	-1	0	0	0	0	0	0	0	0	-1	0	0	0	2	0	-1	0	-1	0	2	0	1	0	0
PF02839	CBM_5_12	Carbohydrate binding domain	0	0	0	0	0	0	0	0	0	0	0	0	0	0	0	0	FALSE	FALSE	FALSE		0	0	0	0	0	0	0	0	0	0	0	0	0	0	0	0	0	0	0	0	0	0	0	0	0	0	0
PF02840	Prp18	Prp18 domain	2	3	23	35	2	4	3	1	17	31	1.18421	1.48026	1.68889	2.70222	0.0620753	0.673856	0.0951518	0.385408	-0.290256		0	0	-1	0	0	0	0	0	0	-1	1	0	-1	0	0	0	3	0	0	0	-2	0	2	-8	0	0	0
PF02841	GBP_C	Guanylate-binding protein, C-terminal domain	2	5	25	42	3	3	2	5	21	36	1.54462	0.866496	1.94222	3.46222	0.622598	0.0669791	0.366447	-0.0992031	0.46565		0	0	0	0	-1	0	0	0	0	-1	0	-2	-1	1	-1	0	1	0	0	0	-1	2	-1	-3	1	0	0
PF02842	0	0	0	0	0	0	0	0	0	0	0	0	0	0	0	0	0	0	FALSE	FALSE	FALSE		0	0	0	0	0	0	0	0	0	0	0	0	0	0	0	0	0	0	0	0	0	0	0	0	0	0	0
PF02843	GARS_C	Phosphoribosylglycinamide synthetase, C domain	1	2	39	47	1	7	4	1	33	35	0.320057	2.30263	3.12444	3.04	1.57391	5.55085	-0.678526	1.73349	-2.41202		0	0	-1	0	0	0	0	0	0	0	0	0	-1	0	0	0	1	0	0	0	-3	1	1	-3	1	0	0
PF02844	GARS_N	Phosphoribosylglycinamide synthetase, N domain	3	0	30	49	2	5	3	3	27	35	0.789474	1.55817	2.53333	3.20889	0.121934	1.08037	-0.138498	0.524889	-0.663386		0	0	0	1	0	1	0	0	0	0	0	0	0	0	0	0	1	0	0	0	-3	1	0	-3	1	0	0
PF02845	CUE	CUE domain	5	6	42	67	6	3	5	7	33	61	1.86981	0.522446	3.20889	5.74222	2.61871	1.42479	0.976293	-0.63336	1.60965		-1	-2	0	1	3	1	0	0	0	0	0	-1	1	1	-1	-1	-1	0	0	0	-3	3	2	-3	2	-1	1
PF02847	MA3	MA3 domain	3	3	53	57	3	7	4	6	46	44	0.710526	1.65789	4.22222	4.22222	0.384426	1.97368	-0.271448	0.795724	-1.06717		0	-1	-1	1	0	1	0	0	0	1	0	0	0	-1	0	0	0	0	0	0	-3	3	8	-1	0	0	3
PF02852	Pyr_redox_dim	Pyridine nucleotide-disulphide oxidoreductase, dimerisation domain	7	7	171	15	9	4	15	1	145	15	0.666118	2.96053	13.5111	1.35111	1.63706	5.56946	-0.697388	1.73811	-2.4355		1	0	-3	1	2	6	0	0	-1	1	-3	0	-1	-1	-1	-1	2	1	0	8	8	19	20	6	8	7	8
PF02854	MIF4G	MIF4G domain	5	5	165	28	11	2	17	3	133	27	0.868421	0.789474	12.6667	2.53333	0.238025	0.121934	-0.203678	-0.138498	-0.0651805		-1	-2	0	0	1	1	0	1	0	-1	-2	1	0	0	0	0	8	-1	0	31	16	33	40	11	10	5	5
PF02861	Clp_N	Clp amino terminal domain, pathogenicity island component	5	5	52	60	1	10	3	7	51	44	0.219298	2.32198	4.56	4.30667	3.03056	8.09822	-1.08773	2.35351	-3.44124		-1	0	-1	1	0	0	0	1	-1	0	-1	0	-1	0	0	1	6	1	0	0	-6	5	7	-1	1	0	1
PF02862	DDHD	DDHD domain	4	4	28	48	3	6	2	4	26	37	1.2688	1.73299	2.36444	3.46222	0.184941	2.00809	0.17577	0.805591	-0.629822		0	0	-1	0	1	1	0	0	0	1	-1	0	-1	0	0	0	1	-1	0	0	-2	0	1	-3	0	0	0
PF02866	Ldh_1_C	lactate/malate dehydrogenase, alpha/beta C-terminal domain	2	0	159	30	9	2	15	3	129	23	0.740132	0.910931	12.16	2.19556	0.892085	0.0188999	-0.46229	-0.050291	-0.411999		0	0	0	0	0	0	0	0	0	0	0	0	0	0	0	0	6	1	0	29	14	20	29	12	7	2	2
PF02867	Ribonuc_red_lgC	Ribonucleotide reductase, barrel domain	6	2	163	18	13	1	16	2	131	15	1.04726	0.696594	12.4133	1.43556	0.0300585	0.143603	0.0643126	-0.15198	0.216293		3	0	3	0	1	-1	0	0	0	0	0	0	2	-2	0	0	7	1	0	37	9	91	29	18	4	2	3
PF02868	Peptidase_M4_C	Thermolysin metallopeptidase, alpha-helical domain	0	0	7	13	0	2	1	0	5	11	0	2.15311	0.506667	0.928889	0.553398	1.33015	-0.340148	0.604188	-0.944336		0	0	0	0	0	0	0	0	0	0	0	0	0	0	0	0	0	0	0	0	0	0	2	0	0	0	-1
PF02871	0	0	0	0	0	0	0	0	0	0	0	0	0	0	0	0	0	0	FALSE	FALSE	FALSE		0	0	0	0	0	0	0	0	0	0	0	0	0	0	0	0	0	0	0	0	0	0	0	0	0	0	0
PF02872	5_nucleotid_C	5'-nucleotidase, C-terminal domain	6	4	66	65	3	7	3	9	62	49	0.546559	1.42922	5.48889	4.89778	1.22766	0.975845	-0.572088	0.490493	-1.06258		0	0	0	3	0	2	1	0	0	-1	-2	0	0	0	1	-1	7	1	-1	1	-2	0	1	-3	0	0	1
PF02873	MurB_C	UDP-N-acetylenolpyruvoylglucosamine reductase, C-terminal domain	0	0	4	25	0	2	0	5	4	17	0	1.07656	0.337778	1.85778	0.368932	0.0118013	-0.264731	0.0392949	-0.304026		0	0	0	0	0	0	0	0	0	0	0	0	0	0	0	0	0	0	0	0	0	0	0	0	0	0	0
PF02874	ATP-synt_ab_N	ATP synthase alpha/beta family, beta-barrel domain	4	6	167	25	12	1	15	2	136	27	0.941094	0.408348	12.7511	2.44889	0.0479995	0.933433	-0.0827143	-0.476289	0.393575		0	-1	0	0	-1	0	0	0	1	-2	3	0	0	0	-1	1	-1	2	-1	14	11	18	18	8	6	6	4
PF02875	Mur_ligase_C	Mur ligase family, glutamate ligase domain	2	3	13	41	0	4	1	6	14	32	0	1.24654	1.26667	3.20889	1.3835	0.211172	-0.620682	0.189868	-0.810551		0	0	0	0	0	0	1	-1	0	0	0	1	0	0	-1	0	-1	0	0	0	0	0	0	0	0	0	0
[truncated: 5,098 more rows]
[truncated: 228 more columns]

## Sheet: 2. Arctic PFAM log10 Pvalues
		Signed log10 Pvalue		Signed log10 Pvalue
PFAM	Function	Presence/ absence	Expansion/ contraction
PF00496	Bacterial extracellular solute-binding proteins, family 5 Middle	-1.67092	0.808854
[truncated: 3,858 more rows]

## Sheet: 3. Tree topologies
Alignments								RAxML best-scoring trees
[truncated: 5,006 more rows]

[truncated: 6 more sheets: 4. IBD BLAST searches, 5. IBD BLAST heatmap, 6. Environmental correlations, 7. PF11999, 8. PF03831, 9. PF03988]
